# Supplementary material for: Integrator complex subunit 12 knockout overcomes a transcriptional block to HIV latency reversal
Source: eLife. 2025 Apr 10;13:RP103064. doi: 10.7554/eLife.103064 (PMC11984954; doi:10.7554/eLife.103064)
Supplement: Supplementary file 3. [file elife-103064-supp3.xlsx]

## Sheet: Key
Key	Tabs
Effect of LRAs alone	E vs D: AZD5582 & I-BET151 treated AAVS1 KO vs DMSO treated AAVS1 KO
Effect of KO alone	A vs D: DMSO trearted INTS12 KO vs DMSO treated AAVS1 KO
Effect of both	B vs D: AZD5582 & I-BET151 treated INTS12KO vs DMSO treated AAVS1KO
	F vs D: PMA ionomycin treated AAVS2KO vs DMSO treated AAVS1 KO
MN989412	= nomenclature for all HIV reads averaged together
Tabs 2-3 are sorted by highes fold change (FC)
NOTE that not all genes with a high FC have a high counts per million (CPM) or are statistically significant

## Sheet: E_vs_D
Geneid	gene_length	logFC	logCPM	PValue	FDR	is.sig	CPM.TMMnormalized.10	CPM.TMMnormalized.11	CPM.TMMnormalized.13	CPM.TMMnormalized.14	CPM.TMMnormalized.16	CPM.TMMnormalized.17	FPKM.TMMnormalized.10	FPKM.TMMnormalized.11	FPKM.TMMnormalized.13	FPKM.TMMnormalized.14	FPKM.TMMnormalized.16	FPKM.TMMnormalized.17
MN989412	634	3.51798	7.50718	7.37567e-16	1.11719e-11	1	28.315	365.519	30.301	359.937	29.0275	278.346	44.6608	576.529	47.7933	567.725	45.7847	439.032
FMN2	6441	2.61265	-2.28589	0.000138431	0.00281074	1	0.0357061	0.291731	0.0638812	0.271096	0.0388588	0.309642	0.00554357	0.0452928	0.0099179	0.042089	0.00603303	0.0480736
EML1	4520	2.2166	-1.74898	0.000156432	0.00307326	1	0.107118	0.350077	0.106469	0.580919	0.0582881	0.353877	0.0236988	0.0774506	0.023555	0.128522	0.0128956	0.0782913
DHRS2	1687	1.86229	-1.36904	0.000301119	0.00486772	1	0.0892653	0.544564	0.255525	0.639011	0.116576	0.464463	0.0529137	0.3228	0.151467	0.378785	0.0691027	0.275319
C5AR1	2341	1.75864	-0.796873	9.56598e-05	0.00212457	1	0.23209	0.816846	0.127762	0.871379	0.369158	0.81834	0.0991413	0.34893	0.054576	0.372225	0.157692	0.349569
BCL3	1864	1.6985	1.9553	7.29046e-08	1.24077e-05	1	1.58892	6.30138	2.34231	6.46756	1.53492	4.86581	0.852427	3.38057	1.2566	3.46972	0.823455	2.61041
WNT10A	2375	1.6801	-0.143733	6.14756e-06	0.000302328	1	0.392768	1.38086	0.383287	1.12311	0.466305	1.50398	0.165376	0.581414	0.161384	0.472888	0.196339	0.633253
EFR3B	7458	1.64194	3.55944	3.61168e-10	2.87927e-07	1	5.14168	16.7259	6.32424	20.2741	5.69281	16.4553	0.689419	2.24268	0.84798	2.71843	0.763315	2.20639
CAPN9	2593	1.61332	-1.29717	0.000245168	0.00420027	1	0.196384	0.544564	0.212937	0.561555	0.136006	0.57505	0.0757361	0.210013	0.08212	0.216566	0.0524511	0.22177
MIR3190	80	1.54059	-2.28973	0.047132	0.160863	0	0.196384	0.213936	0.0212937	0.426007	0.0194294	0.0884692	2.4548	2.6742	0.266172	5.32509	0.242867	1.10587
TPPP	6022	1.49351	1.2216	2.61401e-06	0.000166363	1	0.785535	3.38408	1.32021	3.58233	1.53492	3.22913	0.130444	0.561952	0.219231	0.594874	0.254886	0.536222
PPP3CB-AS1	3095	1.49235	3.00042	1.93854e-09	9.17595e-07	1	4.53468	10.4245	4.02451	12.7996	3.98302	12.1203	1.46516	3.36818	1.30033	4.13557	1.28692	3.91608
C16orf71	2706	1.47142	-1.29793	0.000728946	0.00896941	1	0.142825	0.622359	0.212937	0.561555	0.233153	0.442346	0.0527807	0.229992	0.0786908	0.207522	0.0861613	0.163469
INTS4P2	1768	1.46218	-2.0906	0.00408106	0.0313627	1	0.0892653	0.272282	0.127762	0.29046	0.0971469	0.309642	0.0504894	0.154006	0.0722638	0.164287	0.0549473	0.175137
ROBO1	7901	1.45521	-1.15232	0.000573689	0.00763086	1	0.23209	0.44732	0.212937	0.735831	0.213723	0.641402	0.0293747	0.0566157	0.0269507	0.0931313	0.0270501	0.0811798
ARRDC3	4161	1.45149	5.41318	5.86229e-09	1.96851e-06	1	24.2088	49.1275	19.4199	70.175	24.753	67.9001	5.81802	11.8066	4.66712	16.8649	5.94882	16.3182
ECEL1	2896	1.44848	-1.83067	0.00232369	0.0210417	1	0.107118	0.330628	0.127762	0.348551	0.155435	0.398111	0.0369884	0.114167	0.0441168	0.120356	0.0536723	0.137469
APCDD1	2562	1.43757	-0.00342985	7.67902e-05	0.001817	1	0.499886	1.69204	0.425874	1.52975	0.62174	0.973161	0.195116	0.660436	0.166227	0.597093	0.242678	0.379844
TSNAXIP1	2755	1.41566	-0.641955	0.000294858	0.00479207	1	0.410621	0.894641	0.212937	1.00693	0.349729	0.729871	0.149046	0.324734	0.0772912	0.36549	0.126943	0.264926
ABTB2	4903	1.40846	3.38979	1.08026e-09	6.06024e-07	1	5.5166	16.3564	5.72801	15.7042	5.92596	13.4916	1.12515	3.33599	1.16827	3.20297	1.20864	2.75169
KCTD11	3055	1.36836	2.55156	1.06395e-05	0.000457832	1	3.07073	6.41808	3.34311	12.1993	3.36128	6.56884	1.00515	2.10084	1.09431	3.99322	1.10026	2.15019
GGN	2154	1.36336	-0.781048	0.000341271	0.00531814	1	0.321355	0.700154	0.319406	0.968198	0.272011	0.685636	0.14919	0.325048	0.148285	0.449489	0.126282	0.318308
CHST15	6524	1.3563	-1.51218	0.0045038	0.0334942	1	0.196384	0.311179	0.234231	0.580919	0.0971469	0.464463	0.0301017	0.0476976	0.035903	0.0890434	0.0148907	0.071193
REP15	1139	1.35137	-1.25182	0.00368293	0.0290852	1	0.160678	0.369526	0.255525	0.832651	0.233153	0.442346	0.141069	0.32443	0.224341	0.731037	0.204699	0.388363
OAZ3	1172	1.34699	-1.7167	0.00620061	0.0414112	1	0.142825	0.330628	0.234231	0.464735	0.0777175	0.353877	0.121864	0.282106	0.199856	0.396532	0.0663119	0.301943
LOC101929057	5149	1.33488	0.610782	1.01539e-05	0.000444513	1	0.892653	2.04212	0.979511	1.97512	0.680028	2.4329	0.173364	0.396604	0.190233	0.383594	0.13207	0.4725
CHRNB2	5718	1.33026	-1.52734	0.00356882	0.028481	1	0.178531	0.369526	0.17035	0.619647	0.174864	0.33176	0.0312226	0.064625	0.0297918	0.108368	0.0305814	0.0580202
GADD45G	1065	1.3151	-1.73294	0.00714632	0.0456867	1	0.0892653	0.466769	0.212937	0.387279	0.155435	0.265408	0.0838172	0.438281	0.199941	0.363643	0.145948	0.249209
FAM27C	703	1.30416	-0.495388	0.000362816	0.0055567	1	0.339208	0.91409	0.361993	0.774559	0.466305	1.21645	0.482515	1.30027	0.514926	1.10179	0.663307	1.73037
SCUBE2	4707	1.29181	-1.33528	0.0024373	0.0217036	1	0.23209	0.564013	0.17035	0.600283	0.213723	0.353877	0.0493074	0.119824	0.0361907	0.12753	0.0454054	0.075181
MECOM	6826	1.2892	-1.4702	0.00468818	0.0344718	1	0.196384	0.350077	0.191644	0.367915	0.174864	0.685636	0.02877	0.0512858	0.0280755	0.0538991	0.0256174	0.100445
LOC101928414	672	1.27959	-0.698261	0.000638292	0.00823514	1	0.23209	0.816846	0.404581	0.735831	0.388588	0.928927	0.345372	1.21554	0.602055	1.09499	0.578255	1.38233
PGPEP1L	1576	1.26785	-1.71792	0.00791491	0.049114	1	0.214237	0.350077	0.17035	0.445371	0.0777175	0.33176	0.135937	0.22213	0.10809	0.282596	0.0493131	0.210507
METRNL	3223	1.26782	-0.559867	0.000719883	0.00890856	1	0.267796	0.875192	0.319406	0.987562	0.544023	0.862575	0.0830891	0.271546	0.099102	0.306411	0.168794	0.267631
ID2	1364	1.25688	1.66099	5.35123e-07	5.13007e-05	1	1.82101	4.5121	2.06549	3.96961	1.67093	4.79945	1.33505	3.30799	1.51429	2.91027	1.22502	3.51866
MEFV	3674	1.24341	-0.735597	0.00335644	0.0272299	1	0.535592	0.719602	0.191644	1.00693	0.252582	0.641402	0.145779	0.195863	0.0521621	0.274068	0.0687485	0.174579
ARRDC4	4067	1.24311	4.75079	3.17134e-09	1.29828e-06	1	17.9066	39.9088	16.6304	36.1719	13.3868	37.4004	4.40291	9.81283	4.08911	8.894	3.29158	9.19605
STOX1	3593	1.24251	3.66854	8.49834e-08	1.38413e-05	1	7.39117	13.9253	7.04822	20.1385	8.17977	19.5075	2.0571	3.87567	1.96165	5.60493	2.27658	5.4293
MLK7-AS1	2537	1.22356	-1.42289	0.0174667	0.0844249	0	0.339208	0.583461	0.191644	0.503463	0.0582881	0.309642	0.133704	0.229981	0.0755394	0.198448	0.0229752	0.122051
FAM129A	6969	1.2177	-1.75003	0.00874006	0.0526353	0	0.196384	0.466769	0.106469	0.309823	0.155435	0.309642	0.0281796	0.0669779	0.0152775	0.0444574	0.0223038	0.0444314
MIR5091	93	1.21395	-1.91733	0.0143507	0.0739606	0	0.124971	0.291731	0.149056	0.213004	0.136006	0.464463	1.34378	3.13689	1.60275	2.29036	1.46243	4.99423
IRF7	4276	1.21191	3.67486	3.13499e-08	6.75918e-06	1	6.80202	19.0597	8.45361	19.2478	7.83004	15.0619	1.59074	4.45738	1.97699	4.50135	1.83116	3.52242
GPR17	2599	1.19914	3.20297	6.10814e-09	1.96851e-06	1	5.99863	12.6417	5.30214	12.8383	5.40137	12.9165	2.30805	4.86405	2.04007	4.93971	2.07825	4.9698
MAF	6878	1.19825	-1.07133	0.00152407	0.0154209	1	0.267796	0.661256	0.234231	0.658375	0.291441	0.508698	0.0389352	0.0961408	0.0340551	0.0957218	0.0423729	0.0739602
MYLK4	5760	1.19762	0.297624	0.000122322	0.00257693	1	0.803388	1.57535	0.681399	2.09131	0.680028	1.30492	0.139477	0.273498	0.118298	0.363074	0.11806	0.226549
SSPO	15585	1.1955	4.45038	7.88505e-10	4.60482e-07	1	13.604	29.9121	13.3938	33.0349	12.8234	28.2438	0.872893	1.91929	0.8594	2.11966	0.822803	1.81224
PLEKHN1	2436	1.19269	-1.39579	0.00364233	0.0288548	1	0.196384	0.466769	0.212937	0.580919	0.213723	0.375994	0.0806173	0.191613	0.0874127	0.238473	0.0877353	0.154349
TCHH	6995	1.16556	0.252247	0.000106671	0.00232482	1	0.767682	1.45865	0.766574	1.89767	0.602311	1.43762	0.109747	0.208528	0.109589	0.271289	0.0861059	0.205522
FAM222A	3140	1.16054	3.65724	8.76469e-08	1.41233e-05	1	7.49829	18.5735	7.41022	19.4995	8.43235	14.0666	2.38799	5.91513	2.35994	6.21004	2.68546	4.47981
PAG1	10743	1.15976	4.95754	7.19575e-10	4.60482e-07	1	20.0668	39.3836	18.1635	44.905	19.3517	44.4337	1.8679	3.66598	1.69073	4.17993	1.80133	4.13606
KREMEN2	2057	1.15835	2.61949	2.61704e-07	3.00305e-05	1	3.87412	9.72436	3.3857	7.97795	4.08017	7.63047	1.88338	4.72745	1.64594	3.87844	1.98355	3.70951
LOC100507564	1181	1.14487	-0.670118	0.000913325	0.0105364	1	0.410621	0.700154	0.319406	0.890742	0.369158	0.862575	0.347689	0.592848	0.270454	0.754227	0.312581	0.730377
BZRAP1	7698	1.14367	7.81786	6.80809e-10	4.60482e-07	1	147.627	316.022	149.972	324.308	124.193	291.55	19.1773	41.0525	19.4819	42.1288	16.1331	37.8735
BMP8A	5626	1.12886	2.61059	1.59692e-07	2.14058e-05	1	3.8027	8.79082	4.23745	7.78431	3.41957	8.47093	0.675916	1.56253	0.753191	1.38363	0.607816	1.50567
LPAL2	2502	1.12432	-1.32014	0.00563734	0.0389135	1	0.160678	0.505667	0.319406	0.464735	0.213723	0.530815	0.0642197	0.202105	0.12766	0.185745	0.0854209	0.212156
RAP2C-AS1	3422	1.11939	0.880538	3.71535e-05	0.00111438	1	1.42825	2.60613	0.936924	2.53668	1.02976	2.27808	0.417372	0.76158	0.273794	0.741286	0.300923	0.665717
SGSM1	6124	1.11247	0.381714	6.47587e-05	0.00161496	1	0.803388	1.67259	0.809161	1.60721	0.796604	1.94632	0.131187	0.27312	0.13213	0.262444	0.130079	0.317819
CALML6	1101	1.11241	-1.65557	0.014914	0.0759078	0	0.107118	0.408423	0.255525	0.445371	0.174864	0.287525	0.0972919	0.370956	0.232084	0.404515	0.158823	0.261149
LOC653712	1104	1.10608	1.43521	7.49319e-05	0.00179744	1	2.24949	2.87841	1.44797	4.27944	1.36006	3.80418	2.03758	2.60726	1.31157	3.8763	1.23194	3.44581
GTF2IRD2	3755	1.10567	-1.30939	0.0117035	0.0643889	0	0.339208	0.350077	0.191644	0.503463	0.155435	0.663519	0.0903351	0.0932295	0.0510369	0.134078	0.0413941	0.176703
FAM189A1	9414	1.10256	-1.81621	0.018296	0.0871202	0	0.196384	0.427872	0.127762	0.348551	0.136006	0.221173	0.0208608	0.0454506	0.0135715	0.0370248	0.0144472	0.0234941
RNA28S5	20284	1.10152	6.69856	0.0199154	0.0921937	0	47.382	195.946	79.1062	103.52	71.675	125.449	2.33593	9.66012	3.89993	5.10352	3.53357	6.18464
TONSL-AS1	1196	1.10116	-1.22982	0.00845681	0.0515267	0	0.285649	0.486218	0.319406	0.658375	0.136006	0.442346	0.238837	0.406537	0.267062	0.550481	0.113717	0.369855
CLIC3	813	1.09635	-1.97423	0.0356184	0.13398	0	0.0714123	0.369526	0.212937	0.329187	0.136006	0.176938	0.087838	0.454521	0.261915	0.404905	0.167289	0.217636
OTUD7A	6080	1.0956	-0.332059	0.00322076	0.0263417	1	0.339208	0.777949	0.638812	1.4523	0.485734	0.862575	0.0557908	0.127952	0.105068	0.238865	0.0798905	0.141871
RNVU1-19	167	1.09095	-1.5831	0.017837	0.0857161	0	0.124971	0.525115	0.149056	0.367915	0.291441	0.309642	0.748332	3.1444	0.892551	2.20309	1.74515	1.85414
JUN	3323	1.09046	4.53746	1.07182e-07	1.62348e-05	1	15.3179	29.8343	14.4371	38.4568	14.708	26.3638	4.60967	8.97813	4.34461	11.5729	4.42613	7.93374
LANCL2	4353	1.08854	4.21794	3.1683e-08	6.75918e-06	1	11.2296	29.0369	12.0097	21.8813	12.4348	24.9262	2.57973	6.67056	2.75894	5.02671	2.8566	5.72621
C2orf61	2384	1.08595	-1.93843	0.0449237	0.155676	0	0.23209	0.44732	0.0851749	0.174276	0.0971469	0.287525	0.0973531	0.187634	0.0357277	0.0731022	0.0407495	0.120606
MAFA	2373	1.08374	0.297785	0.000151234	0.00300229	1	0.660564	1.41976	0.787868	1.80085	0.854893	1.6588	0.278366	0.598296	0.332013	0.758891	0.360258	0.69903
MAMDC4	3660	1.07859	3.6495	4.24471e-08	8.34994e-06	1	7.96247	16.4925	7.89997	19.364	8.27691	15.1061	2.17554	4.50615	2.15846	5.2907	2.26145	4.12735
PLK5	1933	1.07828	-0.664059	0.00300748	0.0252473	1	0.428474	0.622359	0.319406	1.08438	0.388588	0.707754	0.221663	0.321965	0.165238	0.560984	0.201028	0.366143
VASN	5612	1.06457	-0.270664	0.00170745	0.0167504	1	0.589151	1.28362	0.553637	1.16184	0.388588	0.751988	0.104981	0.228727	0.0986523	0.207027	0.0692423	0.133996
ARHGAP42	4752	1.05731	2.16197	2.20135e-06	0.000146245	1	2.99932	5.09556	2.57654	6.69993	3.06984	6.23708	0.631169	1.0723	0.542201	1.40992	0.64601	1.31252
IPO9-AS1	842	1.04258	-0.54032	0.00193345	0.0183065	1	0.553445	0.816846	0.3407	0.890742	0.369158	0.928927	0.657298	0.970126	0.404631	1.05789	0.43843	1.10324
NPTXR	5815	1.04236	0.248955	0.000472038	0.0066081	1	0.678417	1.26417	0.830455	1.97512	0.757746	1.41551	0.116667	0.217397	0.142813	0.33966	0.130309	0.243423
TBC1D30	7824	1.04007	0.00636587	0.00219994	0.0202814	1	0.374914	1.08913	0.830455	1.58785	0.718887	1.23857	0.0479185	0.139203	0.106142	0.202945	0.0918823	0.158304
LINC00304	2243	1.03922	1.30093	0.000188793	0.00350018	1	1.92813	3.34518	1.72479	3.91152	1.10747	2.52137	0.859622	1.49139	0.768966	1.74388	0.493747	1.12411
C1orf53	683	1.03812	-0.554754	0.00226907	0.0207797	1	0.482033	0.933538	0.468462	0.948834	0.31087	0.707754	0.705758	1.36682	0.685889	1.38922	0.455154	1.03624
IL2RB	4043	1.03618	1.59469	8.51236e-06	0.000390717	1	2.08881	4.5899	1.95902	3.42742	1.82636	4.04747	0.516648	1.13527	0.484547	0.847742	0.451734	1.0011
DACT3	2897	1.03447	2.5158	3.05725e-07	3.38016e-05	1	3.42779	7.6239	3.91805	7.82304	3.86645	7.49776	1.18322	2.63165	1.35245	2.70039	1.33464	2.58811
LINC00243	11357	1.03108	0.768895	7.10808e-05	0.00173936	1	1.23186	1.98377	0.979511	2.55604	1.06862	2.18961	0.108467	0.174674	0.0862474	0.225063	0.0940931	0.192799
SIPA1L2	6488	1.02974	6.46638	2.82151e-08	6.19383e-06	1	55.2374	103.448	53.1704	129.719	65.9627	122.884	8.51378	15.9445	8.1952	19.9937	10.1669	18.9402
TPTE2	2884	1.0289	-1.17554	0.00648198	0.0428558	1	0.249943	0.622359	0.234231	0.580919	0.31087	0.420229	0.0866654	0.215797	0.0812174	0.201428	0.107791	0.14571
CNGA4	1911	1.0264	-1.50038	0.0143328	0.0739185	0	0.249943	0.350077	0.191644	0.561555	0.174864	0.353877	0.130792	0.18319	0.100284	0.293854	0.0915041	0.185179
INO80C	1232	1.02276	3.7463	6.30019e-08	1.16377e-05	1	8.94439	19.3904	9.66735	16.5562	7.90776	17.915	7.26005	15.7389	7.84688	13.4385	6.41863	14.5414
DNAH6	12795	1.02052	2.40492	0.000150077	0.00299107	1	3.58847	4.43431	3.045	9.04297	3.78873	7.71894	0.280459	0.346566	0.237984	0.706758	0.29611	0.603278
KLF10	3594	1.01757	5.12784	5.2432e-09	1.93704e-06	1	24.6908	45.4516	22.8269	50.8498	21.7803	44.0134	6.87	12.6465	6.35138	14.1485	6.06019	12.2464
MAFB	3393	1.01716	0.273917	0.000324524	0.00511505	1	0.856947	1.40031	0.851749	1.62657	0.62174	1.70303	0.252563	0.412705	0.251031	0.479391	0.183242	0.501925
TRPC1	4170	1.01487	-0.419358	0.00197081	0.0186341	1	0.499886	0.952987	0.3407	0.832651	0.563452	1.08375	0.119877	0.228534	0.0817025	0.199676	0.13512	0.259892
NEU4	5494	1.01455	-1.62682	0.0191976	0.0900825	0	0.178531	0.388974	0.234231	0.484099	0.155435	0.265408	0.0324956	0.0707998	0.042634	0.0881142	0.0282918	0.0483086
METTL25	2094	1.01294	2.48273	9.88539e-07	8.09373e-05	1	3.69559	6.59311	3.49217	7.4164	3.86645	8.33822	1.76484	3.14857	1.6677	3.54174	1.84644	3.98196
MIR3137	75	1.01053	-1.71666	0.0767773	0.221429	0	0.178531	0.311179	0.3407	0.445371	0.0194294	0.309642	2.38041	4.14906	4.54266	5.93828	0.259058	4.12856
SNORA78	127	1.00921	-1.67016	0.032649	0.126895	0	0.124971	0.350077	0.319406	0.445371	0.116576	0.309642	0.984027	2.75651	2.51501	3.50686	0.917923	2.43813
GNA14	2491	1.0051	-1.63996	0.0164908	0.0813333	0	0.196384	0.311179	0.191644	0.348551	0.174864	0.486581	0.0788373	0.124921	0.0769344	0.139924	0.0701985	0.195335
POU3F1	2928	1.00238	-0.883021	0.00388278	0.0303001	1	0.410621	0.641808	0.319406	0.677739	0.272011	0.707754	0.140239	0.219197	0.109087	0.231468	0.0929	0.241719
NEK8	2858	1.0006	2.59742	1.42686e-05	0.000564297	1	4.05265	10.0355	4.62074	6.87421	3.38071	7.16601	1.418	3.51138	1.61677	2.40525	1.18289	2.50735
NEGR1	5669	0.99901	-1.73372	0.0196139	0.0912723	0	0.23209	0.350077	0.149056	0.348551	0.136006	0.353877	0.0409402	0.0617528	0.0262932	0.0614838	0.0239911	0.0624231
CA13	3855	0.997418	1.47054	2.84651e-05	0.000925239	0	1.92813	3.24794	2.06549	4.14389	1.49606	3.56089	0.500164	0.842525	0.535795	1.07494	0.388084	0.923706
LINC01136	2741	0.995127	-0.472547	0.00769313	0.0482517	0	0.64271	1.14747	0.383287	0.600283	0.330299	0.995279	0.23448	0.418633	0.139835	0.219001	0.120503	0.363108
MTURN	5814	0.991437	5.18132	3.89682e-09	1.55329e-06	0	25.1014	45.9768	23.7212	46.4735	23.9758	52.3517	4.31741	7.90794	4.08002	7.99338	4.12381	9.00441
RFTN2	3113	0.99044	0.666251	0.000459407	0.00650949	0	0.856947	1.517	1.19245	2.3624	1.08805	2.34443	0.27528	0.487311	0.383054	0.758883	0.349517	0.753111
LOC101928841	9405	0.988506	-1.11073	0.00960373	0.0561837	0	0.23209	0.564013	0.212937	0.522827	0.408017	0.619284	0.0246773	0.0599695	0.0226409	0.0555903	0.043383	0.0658463
ADRA2B	3371	0.988128	-0.989755	0.00949606	0.0557266	0	0.23209	0.505667	0.447168	0.619647	0.272011	0.751988	0.068849	0.150005	0.132651	0.183817	0.0806916	0.223076
MAP3K14	4486	0.983102	4.98086	2.05677e-08	5.01564e-06	0	20.6024	45.8795	23.3805	40.6643	19.6431	39.1476	4.59261	10.2273	5.21188	9.06472	4.37876	8.72662
SOCS1	1216	0.967558	1.36445	6.1071e-05	0.00155209	0	1.92813	4.02588	1.7035	3.23378	1.51549	2.8089	1.58563	3.31076	1.4009	2.65936	1.24629	2.30995
TAS2R10	2772	0.964852	-0.718704	0.00858953	0.0520215	0	0.553445	0.622359	0.276818	0.910106	0.31087	0.729871	0.199656	0.224516	0.0998623	0.328321	0.112146	0.263301
SCN11A	6523	0.964487	-0.308684	0.00169159	0.016638	0	0.589151	0.933538	0.425874	0.968198	0.544023	1.17222	0.0903191	0.143115	0.0652881	0.148428	0.0834007	0.179705
PBLD	2854	0.958891	2.10422	2.93604e-06	0.000178603	0	2.80293	5.81517	3.17276	5.17018	2.73954	5.94955	0.982106	2.03755	1.11169	1.81156	0.959896	2.08464
CRISPLD2	4589	0.956149	-0.806484	0.00524627	0.0370951	0	0.321355	0.719602	0.319406	0.793923	0.446876	0.597167	0.0700273	0.15681	0.0696025	0.173006	0.0973797	0.13013
MIR1273H	116	0.952542	-1.99457	0.2175	0.429527	0	0.0535592	0.505667	0.212937	0.309823	0.174864	0	0.461717	4.35919	1.83567	2.67089	1.50745	0
KCNC3	6272	0.950247	3.22156	1.18285e-06	9.14111e-05	0	5.60586	13.0695	7.15469	13.09	6.29512	10.5721	0.893792	2.08379	1.14074	2.08706	1.00369	1.6856
FBLL1	1058	0.945517	-1.25399	0.0514013	0.170027	0	0.214237	0.330628	0.234231	0.890742	0.330299	0.265408	0.202492	0.312503	0.22139	0.841912	0.312192	0.250858
SH3BP5	3559	0.943861	5.65013	4.92865e-09	1.91421e-06	0	34.5278	65.8145	34.0061	71.0464	34.4677	61.2649	9.70155	18.4924	9.55495	19.9625	9.68466	17.2141
PRDM11	11334	0.941741	3.28306	3.4264e-06	0.000198156	0	6.35569	13.9642	7.51668	14.0582	6.08139	10.2182	0.560763	1.23206	0.663198	1.24036	0.536562	0.901552
IQCH-AS1	6683	0.939422	2.02988	1.19024e-05	0.000496656	0	2.83864	4.90108	2.76818	6.37075	2.72011	4.68887	0.424755	0.733365	0.414213	0.953276	0.40702	0.701611
LOC101928718	2767	0.937929	-0.725077	0.00694705	0.0447965	0	0.446327	0.7585	0.468462	0.813287	0.252582	0.663519	0.161303	0.274124	0.169303	0.293924	0.0912837	0.239797
TF	2791	0.936575	-1.55448	0.0604177	0.188298	0	0.142825	0.291731	0.0851749	0.484099	0.388588	0.420229	0.0511733	0.104526	0.0305177	0.17345	0.139229	0.150566
LOC100288123	1698	0.935782	-1.67165	0.0310621	0.122685	0	0.160678	0.369526	0.234231	0.464735	0.174864	0.24329	0.0946276	0.217624	0.137945	0.273696	0.102983	0.143281
SNCB	1450	0.932158	-2.07063	0.0550563	0.176878	0	0.0714123	0.252833	0.17035	0.29046	0.174864	0.24329	0.0492498	0.174368	0.117483	0.200317	0.120596	0.167786
POLR3B	4414	0.931765	4.51197	1.8396e-08	4.56794e-06	0	15.5679	29.3481	16.6304	28.5425	14.844	31.8489	3.52693	6.64887	3.76765	6.46635	3.36295	7.21543
LOC101927322	1205	0.924239	-2.031	0.111115	0.281577	0	0.196384	0.0777949	0.106469	0.329187	0.116576	0.420229	0.162974	0.06456	0.0883557	0.273185	0.0967438	0.348738
C10orf32	2435	0.923722	3.03747	9.8569e-07	8.09373e-05	0	5.98078	10.8524	5.87707	9.58516	5.0905	11.7443	2.45617	4.45683	2.41358	3.93641	2.09055	4.82312
FAXDC2	2997	0.923529	-1.64187	0.0238074	0.103475	0	0.214237	0.44732	0.17035	0.348551	0.194294	0.309642	0.0714838	0.149256	0.0568401	0.1163	0.0648294	0.103317
DCLK2	4398	0.923403	-0.387984	0.00511325	0.0365251	0	0.392768	0.875192	0.638812	1.20057	0.485734	0.774106	0.0893059	0.198998	0.14525	0.27298	0.110444	0.176013
FAM20C	4810	0.923119	0.237467	0.00155256	0.0156361	0	0.624857	1.76983	1.0221	1.43293	0.738316	1.2828	0.129908	0.367949	0.212495	0.297907	0.153496	0.266695
MIR5010	120	0.921137	-1.68782	0.0654362	0.198789	0	0.178531	0.291731	0.0638812	0.484099	0.31087	0.287525	1.48776	2.43109	0.532343	4.03416	2.59058	2.39604
NXN	3121	0.919447	5.98773	9.55641e-08	1.49228e-05	0	42.0975	80.0898	45.6963	96.4519	43.8521	72.3678	13.4885	25.6616	14.6416	30.9042	14.0507	23.1874
XCL1	1367	0.912651	-1.97574	0.142284	0.330498	0	0.0892653	0.311179	0.0212937	0.348551	0.330299	0.176938	0.0653002	0.227637	0.015577	0.254975	0.241624	0.129436
LINC01465	1684	0.911847	-0.172966	0.00163636	0.0162236	0	0.517739	1.22527	0.596224	1.00693	0.660599	1.10587	0.307446	0.727594	0.354052	0.597937	0.39228	0.656689
GRAPL	967	0.908346	-2.03274	0.0616141	0.190813	0	0.160678	0.388974	0.106469	0.213004	0.155435	0.199056	0.166161	0.402248	0.110102	0.220273	0.160739	0.205849
PCDH19	9756	0.907934	1.13209	0.000566401	0.00757269	0	1.07118	2.45054	1.72479	3.44679	1.72921	2.54349	0.109797	0.251183	0.176793	0.353299	0.177246	0.26071
MX2	2961	0.901442	3.48073	2.50847e-07	2.92276e-05	0	7.28405	14.1392	7.36763	14.6585	8.64607	14.7301	2.46	4.77515	2.48822	4.95053	2.91998	4.97471
LRRN4CL	2585	0.900075	-0.919096	0.00731286	0.0464825	0	0.392768	0.680705	0.298112	0.600283	0.330299	0.641402	0.151941	0.263329	0.115324	0.232218	0.127775	0.248124
HBA1	606	0.897528	-0.695383	0.0515301	0.170161	0	0.23209	0.583461	0.404581	1.27802	0.582881	0.375994	0.382987	0.962808	0.667625	2.10895	0.96185	0.620452
LOC101929147	5118	0.895457	3.09987	3.40316e-07	3.64972e-05	0	5.58801	11.1247	6.1113	10.8632	6.23683	11.3683	1.09183	2.17364	1.19408	2.12255	1.21861	2.22124
SHROOM1	4113	0.889964	-0.671353	0.00695091	0.0448023	0	0.499886	0.680705	0.404581	0.890742	0.330299	0.729871	0.121538	0.165501	0.0983663	0.216568	0.0803062	0.177455
LINC00959	2671	0.887703	1.46647	3.90108e-05	0.0011496	0	1.71389	3.42297	2.12937	3.38869	1.92351	3.84841	0.641668	1.28153	0.797219	1.2687	0.720145	1.44081
STK32C	2119	0.886103	1.51736	8.51462e-05	0.00197505	0	1.69604	3.8314	2.32102	4.02771	1.96237	3.14066	0.800397	1.80812	1.09534	1.90076	0.926082	1.48214
MAMLD1	4860	0.883594	2.1744	3.33067e-05	0.0010338	0	2.87434	6.35973	3.66252	6.29329	2.93384	4.75522	0.591429	1.30859	0.753605	1.29492	0.60367	0.97844
SLIT3	9734	0.870949	-1.27651	0.0233562	0.102129	0	0.339208	0.564013	0.17035	0.445371	0.272011	0.442346	0.0348478	0.0579425	0.0175005	0.0457542	0.0279444	0.0454434
TAS1R3	2559	0.869918	0.864158	0.00111542	0.0122018	0	1.24971	1.94487	1.14986	3.09823	1.37949	1.85785	0.488361	0.760012	0.44934	1.21072	0.539072	0.726008
HAR1B	896	0.869343	-0.79827	0.011356	0.0630531	0	0.482033	0.7585	0.276818	0.580919	0.369158	0.751988	0.537983	0.84654	0.308949	0.648347	0.412007	0.839273
COL11A2	45942	0.868413	4.20303	7.88274e-08	1.31209e-05	0	13.0684	24.7193	13.3938	24.8052	12.5902	21.7413	0.284455	0.538055	0.291536	0.539925	0.274046	0.473234
SH3TC1	4260	0.868062	6.33116	4.39616e-08	8.53701e-06	0	56.9156	111.227	56.1728	110.123	57.8413	90.5925	13.3605	26.1097	13.1861	25.8504	13.5778	21.2658
INA	3231	0.866104	3.39106	1.1649e-05	0.000488773	0	6.28428	11.9999	8.1342	16.3626	7.84947	12.1424	1.945	3.71398	2.51755	5.06424	2.42942	3.75809
NOS1AP	6885	0.865403	1.09989	0.00144049	0.0147327	0	0.946213	2.43109	1.6822	3.17569	1.88465	2.56561	0.137431	0.353099	0.244329	0.461248	0.273733	0.372637
PDCL3P4	983	0.865357	0.391285	0.00135161	0.0140321	0	0.678417	1.63369	0.958218	1.76212	1.08805	1.54821	0.690149	1.66195	0.974789	1.7926	1.10686	1.57499
BDNF-AS	3049	0.864654	0.567239	0.000577314	0.00765725	0	1.19616	2.02267	0.91563	1.70403	0.952039	1.87997	0.392311	0.663387	0.300305	0.558881	0.312246	0.616586
IDUA	2218	0.864394	3.62455	1.73972e-05	0.000648129	0	8.48021	16.3564	10.7959	17.5438	6.93629	13.7127	3.82336	7.37438	4.86741	7.90972	3.12727	6.18247
LRRC16A	5431	0.86163	-1.62617	0.0723821	0.212516	0	0.0892653	0.330628	0.255525	0.522827	0.272011	0.24329	0.0164363	0.060878	0.0470493	0.0962672	0.0500849	0.0447966
KCTD21	3397	0.861328	3.49582	5.13772e-06	0.000265601	0	7.39117	14.1003	6.7714	15.375	9.79241	14.0666	2.17579	4.15081	1.99335	4.52605	2.88266	4.14089
UPK3BL	1342	0.859323	0.906806	0.000415777	0.00608262	0	1.4461	2.21715	1.38409	2.78841	1.08805	2.10114	1.07757	1.65213	1.03137	2.0778	0.810764	1.56568
SYCE3	442	0.856821	-0.609925	0.0168129	0.0823358	0	0.553445	0.7585	0.532343	0.716467	0.233153	0.928927	1.25214	1.71606	1.2044	1.62097	0.527494	2.10164
MAOA	5438	0.855227	-0.16016	0.004187	0.0318856	0	0.446327	1.10858	0.702693	0.987562	0.699458	1.23857	0.0820755	0.203857	0.129219	0.181604	0.128624	0.227762
LOC100288846	1359	0.853124	-1.15247	0.0298639	0.119859	0	0.23209	0.427872	0.425874	0.697103	0.233153	0.464463	0.17078	0.314843	0.313373	0.512953	0.171562	0.341768
DTX1	3288	0.851759	7.29202	1.65832e-06	0.000116945	0	107.44	188.03	114.603	250.047	113.176	166.787	32.6763	57.1868	34.8549	76.0483	34.421	50.7258
HIST3H2A	496	0.84979	6.28699	2.20686e-07	2.71767e-05	0	51.0598	114.203	61.5602	93.2956	54.5577	93.6889	102.943	230.248	124.113	188.096	109.995	188.889
PSMG3-AS1	6062	0.848305	4.08726	2.96115e-06	0.00017941	0	11.9437	20.2656	11.0301	26.0252	13.3674	19.1315	1.97026	3.34305	1.81956	4.29317	2.20512	3.15597
NUBP1	1287	0.846012	4.35569	9.1837e-08	1.46427e-05	0	14.1039	27.6366	14.4584	27.0321	15.2909	24.13	10.9588	21.4737	11.2342	21.004	11.8811	18.749
CFAP44	10539	0.845284	4.388	0.00108727	0.0119687	0	14.4788	18.6513	13.7983	35.3392	16.5733	26.6071	1.37383	1.76974	1.30926	3.35319	1.57256	2.52463
HES1	1461	0.844367	4.73609	7.8286e-07	6.89417e-05	0	17.9602	39.9671	20.8891	31.5633	18.3219	31.0306	12.2931	27.356	14.2978	21.6039	12.5407	21.2393
IBA57	7885	0.844015	4.88626	3.93091e-07	4.05044e-05	0	21.8522	43.6429	22.1881	34.584	19.3905	35.6089	2.77136	5.53493	2.81396	4.38606	2.45917	4.51602
CEMP1	1374	0.842658	-1.86812	0.0868848	0.240018	0	0.249943	0.44732	0.106469	0.251732	0.136006	0.199056	0.181909	0.325561	0.0774881	0.183211	0.0989852	0.144873
NGFR	3420	0.839592	-0.0815058	0.00868353	0.0524203	0	0.571298	1.61424	0.74528	1.06502	0.641169	0.796223	0.167046	0.472001	0.217918	0.311409	0.187476	0.232814
SLC6A20	5432	0.839345	4.03407	1.53273e-06	0.00010951	0	12.2115	19.1375	12.7762	23.779	10.2004	20.0162	2.24807	3.52311	2.35203	4.37757	1.87784	3.68486
NUDT14	867	0.835953	3.52599	2.11879e-06	0.00014138	0	7.15908	15.8896	8.85819	15.0652	8.76265	13.204	8.2573	18.3271	10.2171	17.3762	10.1069	15.2296
SCN3B	6066	0.834388	0.263686	0.00238697	0.0214045	0	1.05333	1.28362	0.723987	1.56848	0.718887	1.63668	0.173645	0.211608	0.119352	0.258569	0.118511	0.269812
HIST2H2BF	1067	0.834232	8.37236	1.44784e-07	2.0112e-05	0	200.74	435.009	252.671	415.764	261.053	422.949	188.135	407.694	236.805	389.657	244.661	396.391
ABLIM2	5080	0.833485	2.51925	3.74867e-05	0.00111994	0	3.96338	6.30138	4.23745	9.02361	4.0996	6.56884	0.780193	1.24043	0.834144	1.7763	0.807008	1.29308
COPZ2	923	0.833452	-1.77996	0.0913567	0.248256	0	0.107118	0.194487	0.149056	0.329187	0.291441	0.464463	0.116055	0.210712	0.161491	0.356649	0.315754	0.503211
NAV2	11758	0.830501	2.83945	2.84572e-06	0.000175942	0	4.69536	9.0242	5.70672	9.39152	5.01278	8.95751	0.399333	0.767495	0.485348	0.798735	0.426329	0.761822
SLC35D2	3089	0.821423	-0.991055	0.0207008	0.0947296	0	0.303502	0.486218	0.298112	0.542191	0.408017	0.774106	0.0982526	0.157403	0.0965076	0.175523	0.132087	0.250601
ADI1	5962	0.820264	5.30526	3.83266e-08	7.84504e-06	0	29.404	52.0448	29.6622	51.2177	26.6571	48.083	4.9319	8.72941	4.9752	8.59069	4.47117	8.06491
B9D2	1031	0.817491	2.04575	6.42724e-05	0.00160915	0	2.67796	6.14579	3.32182	4.91845	2.91441	4.6004	2.59744	5.961	3.22194	4.77056	2.82678	4.46207
FLNB	9560	0.816354	10.0738	2.23799e-08	5.13618e-06	0	787.445	1484.15	778.584	1291.94	776.106	1348.29	82.3688	155.246	81.4418	135.141	81.1827	141.035
TMEM133	1856	0.813277	-0.0888605	0.00453389	0.0336476	0	0.535592	0.972436	0.660105	1.29739	0.777175	1.19433	0.288573	0.523942	0.35566	0.699023	0.418737	0.643499
SNORA65	136	0.81327	-0.327249	0.0095132	0.0557865	0	0.589151	1.22527	0.638812	0.774559	0.427446	0.906809	4.33199	9.00933	4.69714	5.69528	3.14299	6.66772
GDF11	4260	0.812344	5.8456	7.37668e-07	6.61151e-05	0	37.4736	67.3509	42.3106	84.7367	45.3676	67.6126	8.79662	15.8101	9.93207	19.8912	10.6497	15.8715
HIST1H3A	469	0.809711	7.13859	6.5377e-07	6.03821e-05	0	89.0868	202.403	104.552	176.851	113.448	158.913	189.951	431.562	222.926	377.081	241.894	338.833
LOC100507462	2712	0.80898	-0.925502	0.0365414	0.136161	0	0.321355	0.369526	0.298112	0.639011	0.446876	0.884692	0.118494	0.136256	0.109923	0.235623	0.164777	0.326214
RPP40	1185	0.808077	2.47429	2.19605e-05	0.000759441	0	4.05265	6.04855	3.61993	7.51322	4.37161	7.56412	3.41995	5.10426	3.0548	6.34027	3.68912	6.38322
CILP2	4199	0.805924	-0.642488	0.0151897	0.0768932	0	0.517739	0.91409	0.298112	0.697103	0.485734	0.685636	0.123301	0.217692	0.070996	0.166016	0.115679	0.163286
ARHGAP31	8079	0.80568	1.27421	0.00145682	0.0148652	0	1.76745	3.85085	1.38409	2.24622	2.04008	3.00795	0.218771	0.476649	0.17132	0.278032	0.252517	0.372317
DBNDD1	2843	0.799773	-0.484046	0.0107013	0.0604334	0	0.428474	0.991884	0.638812	0.755195	0.427446	0.840457	0.150712	0.348887	0.224696	0.265633	0.15035	0.295623
PHPT1	1618	0.79781	4.98438	5.6372e-07	5.30352e-05	0	21.1202	44.7126	22.912	39.5799	25.2776	36.1397	13.0533	27.6345	14.1607	24.4623	15.6228	22.336
POLE4	696	0.797748	2.76909	4.85745e-06	0.00025371	0	4.71321	9.23814	4.81238	8.46205	5.34308	8.13917	6.77185	13.2732	6.91434	12.1581	7.67684	11.6942
WDR66	4295	0.794822	2.44664	1.58145e-05	0.000611075	0	3.98123	6.76815	3.81158	6.15774	4.0996	7.74106	0.926946	1.57582	0.887445	1.4337	0.954505	1.80234
C1orf226	4252	0.794546	1.06298	0.000303538	0.00488741	0	1.67819	2.62558	1.27762	2.69159	1.53492	2.49925	0.394682	0.617492	0.300476	0.633018	0.360988	0.587783
PRMT5-AS1	2104	0.793918	-0.685169	0.0106063	0.0599675	0	0.392768	0.7585	0.404581	0.677739	0.485734	0.796223	0.186677	0.360504	0.192291	0.322119	0.230862	0.378433
WSCD1	5821	0.793	1.30305	0.000351534	0.0054171	0	1.53536	2.80061	1.89514	3.64043	1.92351	2.8089	0.263763	0.481123	0.32557	0.625395	0.330443	0.482545
EBF1	5277	0.792373	1.54895	0.000135866	0.00278102	0	2.12452	3.7147	1.76738	3.62106	2.4481	3.67147	0.402599	0.703942	0.334921	0.686197	0.463919	0.69575
TULP1	2126	0.79146	-1.62504	0.0856992	0.238227	0	0.124971	0.466769	0.361993	0.309823	0.155435	0.309642	0.0587824	0.219553	0.17027	0.145731	0.0731115	0.145645
KIAA0825	8276	0.788449	1.6659	0.000222206	0.00392738	0	2.10666	3.22849	2.34231	4.68608	2.46753	4.02535	0.254551	0.390102	0.283024	0.566225	0.298155	0.486388
CFAP70	3704	0.786548	2.30649	0.000176461	0.00335082	0	3.89197	4.64824	3.407	6.89357	3.51672	7.16601	1.05075	1.25493	0.919815	1.86112	0.949438	1.93467
ERMAP	3500	0.785457	3.89669	1.64777e-06	0.000116945	0	11.2296	21.0241	11.4773	16.866	10.045	18.5564	3.20845	6.00687	3.27923	4.81886	2.87	5.30183
SLC12A6	8295	0.780576	5.06028	3.74401e-07	3.88428e-05	0	23.691	37.9639	25.6163	47.403	24.3061	41.0497	2.85606	4.57672	3.08817	5.71465	2.93022	4.94873
KIAA0513	8623	0.780492	4.80224	4.67681e-07	4.6605e-05	0	18.4958	36.0579	20.4207	37.1014	22.6352	32.5124	2.14494	4.1816	2.36816	4.3026	2.62498	3.77043
LAMA5	11431	0.777549	-0.639658	0.0140155	0.0727278	0	0.482033	0.739051	0.383287	0.639011	0.466305	0.928927	0.0421689	0.0646532	0.0335305	0.0559016	0.040793	0.0812638
RPRM	1471	0.7755	0.169624	0.00882207	0.052967	0	0.589151	1.75038	0.958218	1.31675	0.874322	1.03951	0.400511	1.18993	0.651406	0.895139	0.594372	0.706671
CSGALNACT1	4887	0.774564	-2.05301	0.148812	0.339159	0	0.160678	0.350077	0.0425874	0.232368	0.233153	0.176938	0.0328786	0.0716343	0.00871444	0.0475481	0.0477087	0.0362059
RUVBL1-AS1	588	0.774445	-1.59922	0.101841	0.266606	0	0.214237	0.505667	0.234231	0.445371	0.194294	0.132704	0.364348	0.859977	0.398352	0.757434	0.330432	0.225687
SGSH	2768	0.773546	2.58105	0.000119303	0.00253092	0	4.32044	9.43263	4.13098	6.29329	4.72134	6.79001	1.56085	3.40774	1.49241	2.27359	1.70569	2.45304
LOC101926935	6282	0.771536	0.747377	0.00533985	0.0374978	0	1.4461	1.49755	1.19245	2.78841	0.990898	1.92421	0.230197	0.238388	0.18982	0.443873	0.157736	0.306305
RNVU1-1	164	0.770755	-1.59862	0.146648	0.336048	0	0.107118	0.564013	0.191644	0.387279	0.349729	0.132704	0.653161	3.4391	1.16856	2.36146	2.13249	0.80917
LINC00564	1118	0.768931	-1.68697	0.0553543	0.177545	0	0.23209	0.388974	0.212937	0.329187	0.155435	0.309642	0.207594	0.34792	0.190463	0.294443	0.13903	0.276961
LOC100506022	2438	0.767631	-1.05155	0.0355626	0.13383	0	0.392768	0.641808	0.212937	0.426007	0.369158	0.619284	0.161102	0.263252	0.0873409	0.174736	0.151418	0.254013
RGAG4	4338	0.767411	-0.0882942	0.00537059	0.0376264	0	0.571298	0.991884	0.766574	1.21993	0.680028	1.21645	0.131696	0.22865	0.176711	0.281219	0.156761	0.280418
TMEM191C	1307	0.767298	-0.938545	0.0562175	0.179458	0	0.321355	0.972436	0.383287	0.484099	0.369158	0.353877	0.245872	0.744021	0.293257	0.37039	0.282447	0.270755
TMEM240	1117	0.762276	-0.964891	0.0325725	0.126803	0	0.321355	0.641808	0.468462	0.697103	0.272011	0.442346	0.287695	0.574582	0.419393	0.624085	0.243519	0.396013
LHX4	1879	0.762048	0.310881	0.00426578	0.0321957	0	0.892653	1.4392	1.0221	1.25866	0.777175	1.87997	0.475068	0.765942	0.543959	0.669855	0.413611	1.00052
RAB40AL	1029	0.761948	-1.25271	0.0970116	0.258158	0	0.374914	0.233385	0.127762	0.600283	0.330299	0.619284	0.364348	0.226807	0.124162	0.583365	0.320991	0.601831
C1orf101	3194	0.761645	0.768026	0.00140267	0.0144631	0	1.23186	1.67259	1.32021	2.40113	1.16576	2.23385	0.38568	0.523666	0.413341	0.751763	0.364985	0.699389
TNRC6C-AS1	3189	0.760019	2.55896	0.000783869	0.00945324	0	4.28474	5.54288	4.55686	10.1467	4.21617	6.3919	1.3436	1.73813	1.42893	3.18179	1.3221	2.00436
TMEM27	1580	0.758768	-0.363635	0.0542922	0.175412	0	0.535592	0.525115	0.74528	0.793923	0.388588	1.52609	0.338982	0.332351	0.471696	0.502483	0.245941	0.965882
IL10RA	3786	0.758381	2.9158	9.32591e-05	0.00209584	0	5.85581	11.8832	5.66413	7.9005	5.2265	8.53728	1.5467	3.13871	1.49607	2.08677	1.38048	2.25496
HBA2	605	0.758243	4.97624	0.0519103	0.170831	0	14.8002	32.0126	27.5541	50.966	27.8617	35.5425	24.4631	52.9134	45.5439	84.2413	46.0524	58.7479
HM13-AS1	489	0.755926	-1.73392	0.114616	0.286427	0	0.142825	0.486218	0.127762	0.232368	0.31087	0.265408	0.292075	0.994311	0.261273	0.475189	0.635726	0.542756
MIR6789	98	0.755198	-2.11185	0.101698	0.266309	0	0.107118	0.291731	0.149056	0.213004	0.174864	0.221173	1.09304	2.97684	1.52098	2.17351	1.78433	2.25687
SELM	691	0.754446	0.842247	0.000818347	0.00977564	0	1.33898	2.54778	1.32021	2.03322	1.26291	2.03479	1.93774	3.68709	1.91058	2.94243	1.82765	2.94471
LOC440600	2610	0.753561	-0.160596	0.0101597	0.0583352	0	0.446327	1.08913	0.809161	1.04565	0.680028	1.10587	0.171006	0.41729	0.310024	0.400634	0.260547	0.423703
CCR6	3687	0.752554	-2.01315	0.126717	0.306464	0	0.23209	0.272282	0.17035	0.271096	0.0582881	0.24329	0.0629482	0.0738492	0.0462028	0.0735274	0.0158091	0.065986
ANAPC1P1	1771	0.751848	-2.01264	0.0950136	0.254863	0	0.196384	0.272282	0.17035	0.251732	0.0971469	0.265408	0.110889	0.153745	0.0961885	0.142141	0.0548543	0.149863
LOC151475	2609	0.75061	-2.11125	0.115137	0.287359	0	0.0892653	0.272282	0.212937	0.232368	0.136006	0.221173	0.0342144	0.104363	0.0816164	0.0890639	0.0521294	0.0847731
CELF3	5856	0.749566	-0.479837	0.0139654	0.0725676	0	0.482033	0.855743	0.553637	1.02629	0.485734	0.663519	0.0823144	0.146131	0.0945418	0.175254	0.0829464	0.113306
PPP3CA	4676	0.748091	4.37877	1.63363e-05	0.000621725	0	14.9609	21.4714	14.8843	31.6988	16.6704	24.9483	3.1995	4.59183	3.18313	6.77904	3.5651	5.3354
CYGB	2166	0.7467	-1.73351	0.0835591	0.234436	0	0.142825	0.350077	0.255525	0.406643	0.194294	0.221173	0.0659393	0.161624	0.117971	0.187739	0.0897016	0.102111
MIR16-2	81	0.746401	-1.408	0.0701129	0.208154	0	0.321355	0.388974	0.319406	0.445371	0.116576	0.442346	3.96735	4.80215	3.94328	5.49841	1.43921	5.46106
C9orf156	1647	0.746306	3.43042	1.26865e-06	9.65642e-05	0	8.12315	14.0031	8.19808	13.2062	7.77175	13.204	4.93209	8.50217	4.97759	8.01835	4.71873	8.01702
MST1R	4771	0.743922	-0.633602	0.034447	0.131101	0	0.428474	0.486218	0.425874	1.08438	0.505164	0.707754	0.0898079	0.101911	0.0892631	0.227286	0.105882	0.148345
IBA57-AS1	641	0.743739	1.30591	0.00040492	0.00598373	0	1.89243	2.87841	1.66091	3.52424	1.90408	2.74255	2.9523	4.4905	2.59112	5.49804	2.97048	4.27854
LOC100289580	3776	0.741373	-1.10045	0.102176	0.267114	0	0.23209	0.350077	0.532343	0.852015	0.213723	0.398111	0.0614645	0.092711	0.140981	0.225639	0.0566004	0.105432
PSTK	1706	0.738788	3.10871	4.59015e-06	0.000243102	0	6.60564	10.2884	6.62235	10.3985	6.10082	11.5895	3.872	6.0307	3.8818	6.09522	3.5761	6.79336
LOXL4	3657	0.738024	-2.24275	0.226957	0.440112	0	0.23209	0.330628	0.0425874	0.0968198	0.0971469	0.221173	0.0634646	0.0904097	0.0116455	0.0264752	0.0265646	0.0604794
CAMSAP2	7388	0.737436	2.21987	0.00130144	0.0135952	0	3.24926	4.06478	2.95983	6.39011	4.19675	6.94483	0.439802	0.550187	0.400626	0.864931	0.568049	0.940015
TNFRSF25	1913	0.73718	2.1255	9.31774e-05	0.00209584	0	3.26711	5.2317	2.76818	5.82855	3.69158	5.17545	1.70785	2.73482	1.44704	3.04681	1.92973	2.70541
TSPAN10	2141	0.737132	0.568811	0.02203	0.0984622	0	1.07118	1.08913	0.830455	2.69159	1.34063	1.63668	0.50032	0.508701	0.387882	1.25717	0.626169	0.764447
FOXD4L1	2067	0.736721	-1.34904	0.0983332	0.260322	0	0.285649	0.466769	0.127762	0.600283	0.369158	0.24329	0.138195	0.22582	0.0618105	0.290413	0.178596	0.117702
NUTM2D	5543	0.735343	1.56206	0.000456284	0.00648729	0	1.85672	3.88974	2.7043	3.6017	2.04008	3.4503	0.334966	0.70174	0.487877	0.649774	0.368047	0.622461
AGAP2-AS1	1531	0.735124	-1.70114	0.0704967	0.209047	0	0.160678	0.350077	0.276818	0.329187	0.174864	0.33176	0.104949	0.228659	0.180809	0.215015	0.114216	0.216695
CDH15	2859	0.733352	-1.83252	0.0930987	0.251411	0	0.214237	0.408423	0.191644	0.251732	0.136006	0.24329	0.0749342	0.142855	0.0670317	0.0880488	0.047571	0.0850963
LIMD2	3225	0.731633	6.497	1.33548e-05	0.000536564	0	62.9499	130.734	71.9089	119.65	68.7994	87.6509	19.5194	40.5378	22.2973	37.1008	21.3332	27.1786
OCEL1	1133	0.730978	4.11618	1.305e-06	9.7856e-05	0	12.6757	22.7744	13.0318	22.7914	13.348	19.2199	11.1877	20.101	11.502	20.116	11.7811	16.9638
CCDC153	767	0.730287	-0.546067	0.0191323	0.0898243	0	0.499886	0.777949	0.617518	0.832651	0.349729	0.81834	0.651742	1.01427	0.805108	1.08559	0.45597	1.06694
SNORA33	133	0.729987	1.34615	0.00102277	0.011501	0	2.0531	2.76172	1.42668	3.46615	2.15666	3.16277	15.4369	20.7648	10.7269	26.0613	16.2155	23.7803
SFXN5	4140	0.728615	4.24291	1.41655e-05	0.000561689	0	13.1577	21.1213	14.8417	28.5231	14.708	21.0557	3.17819	5.10176	3.58496	6.88964	3.55267	5.08591
CRTC1	6992	0.727676	5.97089	5.04149e-07	4.95867e-05	0	45.9359	80.1482	48.7626	85.55	46.9414	68.7848	6.56979	11.4628	6.97406	12.2354	6.71358	9.83764
TMEM191B	1334	0.726156	-0.741652	0.0232249	0.101879	0	0.392768	0.855743	0.425874	0.677739	0.446876	0.552933	0.294428	0.641487	0.319246	0.50805	0.334989	0.414492
C1orf145	3534	0.725756	2.07188	0.000279201	0.00460681	0	3.67773	4.66769	3.25794	5.46064	2.48696	5.48509	1.04067	1.3208	0.921884	1.54517	0.703724	1.55209
LINC00893	2351	0.725602	2.4703	3.55106e-05	0.00108302	0	4.51683	6.30138	4.0671	6.91294	3.86645	7.4093	1.92124	2.6803	1.72995	2.94042	1.6446	3.15155
C5	5464	0.724143	2.82819	9.21165e-05	0.00208876	0	5.58801	7.02099	4.89756	10.0693	5.49851	9.35562	1.0227	1.28495	0.896332	1.84284	1.00632	1.71223
C12orf42	3353	0.723971	-2.13384	0.16707	0.364393	0	0.214237	0.136141	0.106469	0.348551	0.0971469	0.221173	0.0638941	0.0406027	0.0317532	0.103952	0.0289731	0.0659627
LOC100129931	4300	0.723739	-1.58097	0.159096	0.353243	0	0.107118	0.44732	0.468462	0.367915	0.116576	0.287525	0.0249113	0.104028	0.108945	0.0855617	0.0271108	0.0668663
MKNK1	2911	0.72364	5.60547	7.08605e-08	1.23371e-05	0	36.2953	60.116	36.0077	61.6742	37.8096	60.0485	12.4683	20.6513	12.3695	21.1866	12.9885	20.6281
LOC101927620	1076	0.723377	-1.9738	0.163645	0.359287	0	0.0714123	0.369526	0.149056	0.174276	0.272011	0.265408	0.0663683	0.343425	0.138528	0.161966	0.252799	0.246661
LHFPL3-AS2	1832	0.72267	1.43845	0.00116887	0.0126013	0	2.26734	2.58668	2.00161	3.44679	1.7875	4.00323	1.23763	1.41194	1.09258	1.88143	0.975711	2.18517
FSTL3	2511	0.722665	2.66679	4.71334e-05	0.00130057	0	4.374	7.60445	4.72721	8.94615	5.20707	7.0333	1.74194	3.02845	1.8826	3.56278	2.0737	2.801
TRAK2	6527	0.721876	6.22494	2.64388e-06	0.000166862	0	54.434	81.5874	50.8068	98.4077	64.0781	99.3288	8.33982	12.5	7.7841	15.077	9.81739	15.2181
COL5A2	6930	0.720647	-0.806515	0.0441376	0.153973	0	0.428474	0.60291	0.532343	0.852015	0.252582	0.530815	0.0618288	0.087	0.0768172	0.122946	0.0364476	0.0765967
GTF2IRD2B	3585	0.719753	0.995611	0.00211425	0.0197196	0	1.12474	2.52833	1.7035	2.67223	1.63207	2.10114	0.313736	0.705253	0.475174	0.745391	0.455249	0.586093
IRGM	1659	0.719288	-0.19215	0.0109255	0.0613829	0	0.660564	1.03078	0.489756	1.16184	0.738316	0.928927	0.39817	0.621327	0.295211	0.700324	0.445037	0.559932
LOC100288162	5380	0.718783	-1.97446	0.115708	0.288167	0	0.142825	0.311179	0.234231	0.29046	0.116576	0.199056	0.0265473	0.05784	0.0435374	0.0539888	0.0216684	0.0369992
FOXP3	2382	0.718094	-0.358259	0.0416754	0.148148	0	0.535592	1.22527	0.361993	0.600283	0.777175	0.951044	0.22485	0.514387	0.15197	0.252008	0.32627	0.399263
ARHGAP26-IT1	388	0.715063	-1.05902	0.0744477	0.216441	0	0.374914	0.44732	0.234231	0.367915	0.388588	0.862575	0.966274	1.15289	0.603688	0.948235	1.00151	2.22313
LOC256880	498	0.714646	-0.748614	0.0217868	0.0980115	0	0.357061	0.7585	0.425874	0.677739	0.485734	0.641402	0.716991	1.52309	0.85517	1.36092	0.97537	1.28796
MDGA1	8907	0.714238	2.01005	9.03887e-05	0.00206192	0	3.26711	4.70659	3.02371	5.38318	2.7784	4.79945	0.366803	0.528415	0.339476	0.604377	0.311935	0.538841
TLL2	6771	0.711997	-0.515262	0.0346153	0.13154	0	0.714123	0.680705	0.361993	1.00693	0.408017	0.774106	0.105468	0.100532	0.0534623	0.148712	0.0602595	0.114327
NTN4	3615	0.708491	-0.98511	0.0738058	0.215278	0	0.517739	0.797397	0.298112	0.387279	0.233153	0.552933	0.14322	0.22058	0.0824653	0.107131	0.0644959	0.152955
L1CAM	5242	0.70841	4.39029	1.28142e-06	9.70484e-05	0	16.157	28.8424	15.3102	24.3211	16.2235	24.7714	3.08223	5.50218	2.92068	4.63967	3.09491	4.72556
PRR7-AS1	1600	0.706222	-1.33687	0.087209	0.240611	0	0.339208	0.44732	0.149056	0.580919	0.31087	0.287525	0.212005	0.279575	0.09316	0.363074	0.194294	0.179703
ADD3-AS1	1280	0.705792	-1.06225	0.0616973	0.190993	0	0.410621	0.622359	0.17035	0.445371	0.408017	0.57505	0.320797	0.486218	0.133086	0.347946	0.318763	0.449258
LOC100132215	2161	0.705646	-1.16545	0.0794723	0.226357	0	0.339208	0.641808	0.149056	0.387279	0.427446	0.486581	0.156968	0.296996	0.0689755	0.179213	0.1978	0.225165
NHSL2	3678	0.704978	0.389429	0.0143087	0.0738194	0	0.92836	1.65314	0.979511	2.07194	0.990898	0.973161	0.252409	0.449467	0.266316	0.563335	0.269412	0.26459
LINC01018	3366	0.704503	-1.38176	0.163723	0.359303	0	0.0714123	0.408423	0.447168	0.600283	0.291441	0.265408	0.0212158	0.121338	0.132849	0.178337	0.0865837	0.0788496
APC2	10151	0.70243	1.44738	0.0170124	0.0830445	0	2.21378	4.92052	2.06549	1.85894	1.86522	3.22913	0.218085	0.484733	0.203477	0.183129	0.183747	0.318109
ZNF880	2262	0.70119	0.00807829	0.0148256	0.0757302	0	0.767682	0.836295	0.74528	1.52975	0.699458	1.23857	0.339382	0.369715	0.329478	0.676284	0.309221	0.547555
KLHDC1	2691	0.70073	2.96805	5.6555e-05	0.00147696	0	6.53422	8.14901	5.4299	10.108	5.82881	10.7269	2.42818	3.02825	2.0178	3.75622	2.16604	3.98621
SLC12A5	6256	0.698609	2.77007	4.8903e-05	0.00132986	0	4.69536	8.77137	6.04742	8.42333	4.81849	8.00646	0.750537	1.40207	0.966659	1.34644	0.770218	1.27981
PKI55	3304	0.696889	3.77792	3.33048e-06	0.000194751	0	11.1403	15.7729	9.81641	18.1247	10.3559	16.8976	3.37177	4.77388	2.97107	5.48568	3.13434	5.11429
LMX1B	5830	0.696026	-0.820681	0.0335277	0.128993	0	0.321355	0.60291	0.532343	0.639011	0.369158	0.729871	0.055121	0.103415	0.091311	0.109607	0.0633204	0.125192
TTC41P	4516	0.695531	-1.76305	0.131334	0.313936	0	0.124971	0.233385	0.319406	0.309823	0.155435	0.420229	0.027673	0.0516795	0.0707276	0.0686057	0.0344187	0.0930533
CPPED1	6143	0.695425	4.78328	4.66596e-07	4.6605e-05	0	19.9062	33.2184	21.3363	32.8994	21.7803	35.9406	3.24046	5.40752	3.47327	5.35559	3.54555	5.85066
KIAA1683	4443	0.694647	2.31354	9.18842e-05	0.00208661	0	3.58847	6.32083	4.00322	6.6612	3.73044	5.30815	0.807668	1.42265	0.901017	1.49926	0.839622	1.19472
MIR4748	82	0.693791	-1.2183	0.0994585	0.262273	0	0.321355	0.330628	0.425874	0.677739	0.155435	0.442346	3.91897	4.03205	5.19359	8.26511	1.89555	5.39446
CYP2G1P	2511	0.6922	-1.9016	0.258552	0.473585	0	0.178531	0.0388974	0.127762	0.503463	0.213723	0.309642	0.0710994	0.0154908	0.0508811	0.200503	0.0851147	0.123314
FAM49A	4699	0.689468	2.41223	0.000388296	0.00582905	0	3.767	6.7487	3.30053	5.98347	5.07107	6.87848	0.801659	1.4362	0.702389	1.27335	1.07918	1.46382
MAN1C1	4641	0.689451	0.139743	0.00911699	0.0541337	0	0.767682	1.06968	0.723987	1.51039	0.952039	1.37127	0.165413	0.230485	0.155998	0.325445	0.205137	0.295469
DYNLL1	984	0.689317	6.25729	0.0113687	0.0631005	0	51.756	73.2439	53.0001	125.033	70.8589	84.8641	52.5976	74.4348	53.8619	127.066	72.0111	86.244
C1QTNF3-AMACR	3612	0.689201	-0.373161	0.0969811	0.258122	0	0.69627	0.486218	0.766574	1.02629	0.233153	1.23857	0.192766	0.134612	0.21223	0.284134	0.0645494	0.342904
HEXDC	2222	0.688607	5.14554	6.669e-06	0.000319878	0	27.9043	42.0287	28.6188	50.6368	24.7336	38.2408	12.5582	18.9148	12.8797	22.7888	11.1312	17.2101
H1F0	2330	0.688472	7.99271	6.70031e-07	6.15088e-05	0	188.582	353.617	207.167	297.218	189.398	292.103	80.9365	151.767	88.9127	127.561	81.2865	125.366
MIR4730	76	0.688326	-1.47214	0.0613871	0.190266	0	0.214237	0.350077	0.255525	0.406643	0.272011	0.442346	2.81891	4.60627	3.36217	5.35057	3.5791	5.82034
CYP2B7P	2910	0.68819	-1.25295	0.0466131	0.159628	0	0.285649	0.505667	0.276818	0.503463	0.31087	0.398111	0.0981612	0.173769	0.0951266	0.173011	0.106828	0.136808
VPS9D1	2749	0.688132	2.89664	2.70475e-05	0.000895367	0	5.5166	9.00475	6.1113	10.0693	5.4208	8.36034	2.00677	3.27565	2.2231	3.66288	1.97192	3.04123
SOX7	3278	0.687889	-0.54801	0.0514472	0.170072	0	0.517739	0.91409	0.681399	0.910106	0.291441	0.552933	0.157944	0.278856	0.20787	0.277641	0.0889081	0.16868
PCDHGB6	4644	0.687684	-0.0201135	0.0103991	0.059273	0	0.607004	1.03078	0.74528	1.33611	0.835463	1.1501	0.130707	0.22196	0.160482	0.287708	0.179902	0.247653
LOC101929541	912	0.687051	-1.1421	0.0519455	0.170899	0	0.285649	0.369526	0.3407	0.619647	0.330299	0.552933	0.313212	0.405182	0.373574	0.679437	0.36217	0.606286
LOC101927189	3168	0.68657	-0.610169	0.0339113	0.130039	0	0.392768	0.91409	0.447168	0.561555	0.582881	0.81834	0.12398	0.288538	0.141152	0.177259	0.18399	0.258314
BTBD9	9382	0.685995	3.98802	2.07304e-05	0.000728547	0	12.1044	18.029	12.3717	23.3917	11.9491	17.1409	1.29017	1.92165	1.31866	2.49325	1.27362	1.827
LOC285804	1953	0.685971	-1.03963	0.0587552	0.184449	0	0.321355	0.350077	0.404581	0.658375	0.31087	0.663519	0.164544	0.179251	0.207159	0.33711	0.159176	0.339743
RNY4	96	0.68588	-1.11344	0.0715735	0.211124	0	0.357061	0.700154	0.361993	0.542191	0.252582	0.309642	3.71939	7.29327	3.77076	5.64782	2.63106	3.22544
SORBS1	7586	0.68553	2.58629	3.40713e-05	0.00105107	0	4.42756	7.44886	4.81238	7.80368	4.50762	6.83425	0.583649	0.981922	0.634377	1.02869	0.594202	0.900902
LRRC1	3180	0.685396	6.05374	2.17752e-07	2.70351e-05	0	53.2557	78.9229	49.295	80.4766	50.1861	86.2796	16.7471	24.8185	15.5016	25.3071	15.7818	27.1319
LOC100288152	1781	0.685379	3.98792	6.17721e-06	0.000302803	0	12.6221	18.0873	12.4994	22.0168	11.3079	18.4679	7.0871	10.1557	7.0182	12.3621	6.34918	10.3694
LINC01252	3671	0.684721	-1.95727	0.159283	0.353452	0	0.285649	0.252833	0.0851749	0.271096	0.116576	0.287525	0.0778123	0.0688731	0.0232021	0.0738479	0.031756	0.0783233
MIR22HG	5474	0.6836	0.982751	0.00144782	0.0147877	0	1.71389	2.56723	1.29892	2.28495	1.43777	2.32232	0.313097	0.468986	0.237288	0.417418	0.262655	0.424245
RABIF	3227	0.681098	4.95564	3.50715e-07	3.66365e-05	0	22.8876	38.6057	23.9341	39.0958	24.6364	36.8474	7.09254	11.9633	7.41684	12.1152	7.63447	11.4185
PTGES	1787	0.680393	-1.6547	0.128855	0.309805	0	0.178531	0.44732	0.276818	0.174276	0.194294	0.420229	0.0999053	0.250319	0.154907	0.0975242	0.108726	0.235159
MIR5189	114	0.680316	-1.44686	0.080375	0.228327	0	0.285649	0.272282	0.212937	0.503463	0.252582	0.442346	2.50569	2.38844	1.86787	4.41634	2.21563	3.88023
SYN1	3210	0.679037	1.48904	0.00130021	0.0135952	0	2.35661	3.77305	1.93773	3.77597	2.07894	2.65408	0.734145	1.17541	0.603654	1.17632	0.647646	0.826815
ZSWIM5	5836	0.678827	2.94224	7.41441e-05	0.00178547	0	5.08812	10.4634	5.96224	8.53951	6.62542	9.26715	0.871851	1.79291	1.02163	1.46325	1.13527	1.58793
LCN12	689	0.677875	0.0666502	0.0100388	0.0578119	0	0.767682	1.16692	0.702693	1.49103	0.854893	1.06163	1.1142	1.69365	1.01987	2.16404	1.24077	1.54083
GBGT1	2059	0.677751	0.817166	0.0269972	0.111886	0	1.24971	1.75038	1.49056	3.29187	1.24348	1.2828	0.606952	0.850114	0.723925	1.59877	0.603924	0.623023
CXXC5	1447	0.676328	1.46513	0.00129809	0.0135883	0	2.14237	3.98699	1.78867	2.88523	2.35095	3.18489	1.48056	2.75535	1.23612	1.99394	1.62471	2.20103
LOC100289495	3908	0.675242	1.60754	0.000401583	0.00594603	0	2.46372	3.42297	2.34231	3.56297	2.15666	4.15805	0.630431	0.875889	0.599363	0.911712	0.551858	1.06398
SLC39A4	2640	0.674571	3.42965	1.15685e-05	0.000486744	0	8.24812	14.8005	8.30455	12.7802	8.27691	12.0318	3.12429	5.60624	3.14566	4.84099	3.13519	4.5575
DUSP10	2738	0.672016	3.51366	1.05422e-05	0.000454938	0	8.83727	13.0501	8.73043	15.7429	8.78208	13.1819	3.22764	4.76628	3.18861	5.74978	3.20748	4.81443
BRWD1-IT2	1009	0.670678	0.747559	0.00383385	0.030011	0	0.999772	1.98377	1.32021	2.16876	1.49606	1.90209	0.990854	1.96607	1.30843	2.14942	1.48272	1.88512
ZFHX3	16168	0.670547	2.70992	6.90201e-05	0.00170268	0	4.90959	7.60445	4.55686	8.79124	5.59566	7.58623	0.303661	0.470339	0.281844	0.543743	0.346095	0.469213
PTRHD1	572	0.670389	4.08487	1.03677e-05	0.000451725	0	11.7116	21.5297	13.2873	18.512	14.2417	22.4048	20.4748	37.6394	23.2295	32.3636	24.8981	39.1693
CILP	4468	0.670363	-1.47212	0.112687	0.283817	0	0.142825	0.427872	0.383287	0.464735	0.233153	0.287525	0.0319661	0.0957636	0.0857849	0.104014	0.0521827	0.064352
ELL2	6046	0.669752	1.23801	0.00125844	0.0132833	0	1.57107	3.26738	1.95902	2.59477	1.86522	2.69831	0.259853	0.540421	0.32402	0.429172	0.308505	0.446297
LHFPL3-AS1	1776	0.669554	-1.55527	0.0820037	0.231392	0	0.303502	0.369526	0.212937	0.367915	0.174864	0.375994	0.170891	0.208066	0.119897	0.20716	0.0984597	0.211708
LOC729683	2348	0.66914	3.307	0.000136321	0.00278658	0	7.15908	12.4277	8.32585	14.2132	7.38316	9.64314	3.04901	5.2929	3.54593	6.0533	3.14445	4.10696
NPIPB6	1405	0.668421	-0.971689	0.0986628	0.260674	0	0.357061	0.525115	0.596224	0.561555	0.155435	0.663519	0.254136	0.373748	0.424359	0.399683	0.11063	0.472256
HMGN3-AS1	2993	0.668011	-0.500097	0.0474734	0.161393	0	0.553445	0.525115	0.425874	1.14247	0.563452	0.796223	0.184913	0.175448	0.14229	0.381715	0.188257	0.266028
ZNF713	4538	0.667668	3.43756	7.8147e-06	0.000366468	0	8.28382	12.4277	8.60266	14.3874	8.16034	12.9607	1.82543	2.73859	1.8957	3.17043	1.79822	2.85605
MDK	1683	0.667136	2.52251	0.000114779	0.00246255	0	4.0705	6.69036	4.59944	7.97795	4.58533	6.34767	2.4186	3.97526	2.73288	4.74032	2.7245	3.77164
HCG11	5679	0.666606	-1.78463	0.192431	0.397258	0	0.249943	0.466769	0.0851749	0.309823	0.233153	0.132704	0.0440118	0.0821921	0.0149982	0.054556	0.0410552	0.0233675
KCNC1	8366	0.666451	0.2902	0.0406831	0.145793	0	0.856947	1.63369	0.873043	1.97512	1.01033	0.707754	0.102432	0.195278	0.104356	0.236089	0.120766	0.0845988
GPR137C	3888	0.666283	2.51645	0.0010292	0.0115391	0	3.94553	5.15391	4.36521	8.48142	4.8962	7.32083	1.0148	1.32559	1.12274	2.18143	1.25931	1.88293
RNVU1-3	161	0.66553	-2.05239	0.18962	0.393621	0	0.178531	0.330628	0.212937	0.271096	0.0777175	0.132704	1.10889	2.05359	1.32259	1.68382	0.482717	0.824247
TGFB1I1	1866	0.663803	-1.10057	0.0445301	0.154737	0	0.285649	0.525115	0.383287	0.522827	0.330299	0.530815	0.153081	0.281412	0.205406	0.280186	0.177009	0.284467
MIR5009	100	0.662953	-1.91969	0.186396	0.389256	0	0.23209	0.116692	0.127762	0.387279	0.155435	0.33176	2.3209	1.16692	1.27762	3.87279	1.55435	3.3176
IQCD	1369	0.662922	1.25815	0.00113205	0.0123096	0	1.94598	2.74227	1.51185	2.9046	2.00123	3.03007	1.42146	2.00312	1.10435	2.12169	1.46182	2.21335
RNU4ATAC	130	0.661843	0.501581	0.0349613	0.132257	0	0.660564	2.11991	1.38409	1.85894	1.18519	1.06163	5.08126	16.307	10.6469	14.2995	9.11686	8.16639
HFM1	4931	0.661804	-0.391128	0.0498271	0.166785	0	0.607004	0.622359	0.638812	0.755195	0.446876	1.32704	0.1231	0.126214	0.12955	0.153152	0.0906258	0.269121
TMEM175	2356	0.661487	4.35589	4.3293e-06	0.000236736	0	15.1573	25.9835	17.7803	25.4249	14.6109	23.7319	6.43347	11.0286	7.5468	10.7915	6.20157	10.0729
BSN	15959	0.660207	4.38431	2.5414e-06	0.000163747	0	15.4429	26.1974	17.5673	26.5674	15.5046	23.8425	0.967661	1.64155	1.10078	1.66473	0.97153	1.49398
CDON	8116	0.660073	5.02164	3.20183e-05	0.00100684	0	26.9224	33.3934	21.3576	44.0918	27.1428	41.8017	3.3172	4.11452	2.63154	5.4327	3.34436	5.15053
RNY3	102	0.659696	-2.11295	0.188092	0.391331	0	0.196384	0.136141	0.106469	0.348551	0.136006	0.221173	1.92533	1.33472	1.04381	3.41717	1.33339	2.16836
MIR548A3	97	0.65894	-1.97349	0.260185	0.475567	0	0.23209	0.252833	0.0851749	0.0774559	0.174864	0.486581	2.39268	2.60653	0.878092	0.798514	1.80273	5.01629
SOX8	3049	0.657516	-0.00355757	0.0147095	0.0753995	0	0.785535	1.45865	0.74528	1.10375	0.699458	0.951044	0.257637	0.478404	0.244434	0.362003	0.229406	0.31192
KRTAP5-9	1188	0.657441	-0.0752581	0.0220952	0.0987247	0	0.892653	0.875192	0.596224	1.14247	0.62174	1.34916	0.751392	0.736694	0.501872	0.961678	0.52335	1.13565
LRRC24	1772	0.657188	2.47143	8.8643e-05	0.00202821	0	4.21332	6.80705	4.4078	7.37767	4.21617	6.03802	2.37772	3.84145	2.48747	4.16347	2.37933	3.40746
ELAC1	2233	0.656909	2.9922	2.28687e-05	0.00078547	0	5.85581	9.70491	6.19647	9.04297	6.41169	10.373	2.62239	4.34613	2.77495	4.0497	2.87134	4.64533
B4GALT1-AS1	1346	0.65665	-1.83051	0.14287	0.330995	0	0.196384	0.213936	0.255525	0.29046	0.116576	0.398111	0.145902	0.158942	0.18984	0.215795	0.0866094	0.295774
DNAJC27-AS1	4676	0.656142	1.47033	0.000706119	0.00878848	0	2.07096	3.28683	2.0442	3.75661	2.25381	2.98584	0.44289	0.702915	0.437168	0.803381	0.481995	0.638545
MCC	9266	0.655834	-0.140992	0.0198634	0.0919815	0	0.678417	0.952987	0.851749	1.16184	0.505164	1.08375	0.0732157	0.102848	0.091922	0.125387	0.054518	0.11696
GSTZ1	1722	0.655741	4.75811	1.16889e-06	9.07955e-05	0	20.7096	34.716	19.9309	31.5439	22.3244	32.9548	12.0265	20.1603	11.5743	18.3182	12.9642	19.1375
LOC440461	1643	0.655457	1.98338	0.000565511	0.00757269	0	3.07073	4.72604	2.44878	5.03463	3.59443	4.62252	1.86898	2.87647	1.49043	3.06429	2.18773	2.81346
B3GNT7	3625	0.65538	-1.1036	0.0898744	0.245727	0	0.339208	0.700154	0.3407	0.580919	0.31087	0.265408	0.0935747	0.193146	0.0939861	0.160254	0.0857572	0.0732159
PRRT3-AS1	614	0.655253	0.5609	0.00984705	0.0570594	0	1.35683	1.59479	1.21374	1.8783	0.777175	1.81362	2.20983	2.59739	1.97678	3.05913	1.26576	2.95378
EHD3	3906	0.655129	0.705231	0.00372272	0.0292925	0	1.26757	1.82818	1.3415	2.24622	1.10747	1.76938	0.324518	0.468044	0.343447	0.575069	0.283532	0.452991
TUBB2B	2019	0.655113	-1.78149	0.181842	0.383936	0	0.178531	0.311179	0.3407	0.387279	0.0777175	0.221173	0.0884253	0.154126	0.168747	0.191817	0.0384931	0.109546
NRGN	1218	0.655106	3.66736	0.000174493	0.00333171	0	8.83727	18.8458	10.7746	15.0458	9.94784	12.5626	7.25556	15.4727	8.84616	12.3529	8.16736	10.3141
FAM167A	4093	0.652001	1.69832	0.00136243	0.0141154	0	3.05287	4.41486	2.25713	3.46615	2.15666	3.89264	0.745877	1.07864	0.551462	0.846848	0.526914	0.951049
LOC101928445	1966	0.65149	-0.248008	0.021137	0.096021	0	0.785535	1.08913	0.553637	0.948834	0.524593	0.906809	0.39956	0.553982	0.281606	0.482622	0.266833	0.461246
CDK5R2	2528	0.651314	1.29731	0.00398435	0.030807	0	1.82101	3.24794	1.6822	3.44679	2.13723	2.14538	0.720337	1.28478	0.665429	1.36344	0.845424	0.848646
HIST2H2AB	448	0.651137	7.63588	1.3933e-05	0.000553921	0	125.775	260.788	161.875	232.968	176.613	235.217	280.747	582.116	361.328	520.018	394.225	525.039
LZTFL1	4514	0.650492	7.57735	1.83723e-06	0.000126456	0	153.161	202.656	151.633	241.778	141.077	255.499	33.9303	44.8949	33.5916	53.5619	31.2531	56.6015
LRRC7	6245	0.648411	-0.830783	0.0718991	0.211539	0	0.410621	0.369526	0.447168	0.871379	0.369158	0.685636	0.0657519	0.0591714	0.0716042	0.139532	0.0591126	0.10979
BIRC3	6911	0.647765	6.02587	1.37637e-05	0.00054863	0	55.2374	66.7285	47.5276	81.4061	49.4478	90.4598	7.99268	9.65541	6.87709	11.7792	7.15494	13.0892
ARHGAP28	5531	0.647731	-0.790765	0.0383562	0.140673	0	0.428474	0.719602	0.3407	0.677739	0.485734	0.57505	0.0774677	0.130103	0.0615982	0.122535	0.0878204	0.103969
SPPL2A	2003	0.645634	4.79419	7.98485e-07	6.91836e-05	0	21.6379	32.5571	21.7409	33.306	21.4695	35.6089	10.8028	16.2542	10.8542	16.6281	10.7187	17.7778
C21orf2	2795	0.645429	4.19139	2.44281e-05	0.00082592	0	14.336	26.3336	14.6075	20.4871	13.7366	19.9056	5.12916	9.42167	5.22629	7.3299	4.91469	7.12185
LOC100506136	1577	0.645306	-1.27555	0.074657	0.216883	0	0.249943	0.388974	0.276818	0.580919	0.349729	0.398111	0.158493	0.246655	0.175535	0.36837	0.221768	0.252449
DNAJC28	3820	0.645142	2.14947	0.000351556	0.0054171	0	3.44564	4.4732	3.36441	5.63491	3.49729	6.03802	0.902001	1.171	0.880735	1.47511	0.91552	1.58063
SNORA14A	134	0.644136	-2.33392	0.245161	0.459757	0	0.0535592	0.194487	0.212937	0.251732	0.116576	0.132704	0.399696	1.4514	1.58908	1.87859	0.869972	0.990327
TSGA10	3832	0.643451	3.21037	0.00013535	0.00277422	0	6.58778	9.21869	7.53798	11.6765	7.49974	12.8944	1.71915	2.40571	1.96711	3.0471	1.95713	3.36492
ITGB6	4687	0.642306	-0.730329	0.0578188	0.182683	0	0.303502	0.564013	0.447168	0.658375	0.582881	0.862575	0.064754	0.120336	0.0954061	0.140468	0.124361	0.184036
LOC101927314	2102	0.6413	-1.97607	0.217466	0.429516	0	0.285649	0.213936	0.149056	0.348551	0.0582881	0.221173	0.135894	0.101777	0.0709115	0.165819	0.0277298	0.10522
LOC101929089	1046	0.641292	0.970758	0.00984293	0.0570573	0	1.41039	3.09235	1.76738	2.18813	1.34063	1.72515	1.34837	2.95635	1.68965	2.0919	1.28167	1.64928
RNU5D-1	100	0.64076	0.785792	0.00675468	0.0439868	0	1.16045	2.41164	1.53315	1.60721	1.28234	2.1675	11.6045	24.1164	15.3315	16.0721	12.8234	21.675
MED11	970	0.640528	3.4136	2.88969e-05	0.00093526	0	7.8732	12.2721	8.24067	14.6004	8.80151	11.9433	8.1167	12.6517	8.49554	15.052	9.07372	12.3127
MIR634	97	0.640447	-1.59605	0.139437	0.326639	0	0.178531	0.408423	0.383287	0.329187	0.136006	0.33176	1.84052	4.21055	3.95141	3.39368	1.40212	3.4202
PLEKHG5	5996	0.64031	4.7225	2.38547e-06	0.000156066	0	21.3523	34.9299	20.229	31.9699	20.2454	29.4602	3.56109	5.82553	3.37376	5.33187	3.37649	4.91332
GTDC1	4565	0.639799	2.70779	0.00011873	0.0025223	0	5.37377	7.13768	5.40861	8.3846	4.46876	8.24975	1.17717	1.56357	1.1848	1.83671	0.978917	1.80717
INTS7	4571	0.639056	6.19197	1.98269e-06	0.00013407	0	58.7009	79.0201	58.7068	93.7797	54.0525	94.2418	12.842	17.2873	12.8433	20.5162	11.8251	20.6173
LINC00858	2685	0.63893	-1.97519	0.196424	0.402219	0	0.23209	0.388974	0.17035	0.154912	0.0971469	0.24329	0.0864394	0.144869	0.063445	0.0576952	0.0361813	0.0906109
SNORD99	80	0.638523	-0.855775	0.0575318	0.182156	0	0.410621	0.544564	0.532343	0.658375	0.272011	0.685636	5.13276	6.80705	6.65429	8.22969	3.40014	8.57045
COL6A1	4225	0.635939	4.71893	5.54136e-06	0.000280719	0	19.7276	34.6771	21.315	33.2867	20.77	28.0226	4.66926	8.20759	5.04497	7.8785	4.91598	6.63257
NRN1L	633	0.635863	-0.0608584	0.0208573	0.0951869	0	0.856947	1.24472	0.596224	0.890742	0.699458	1.23857	1.35379	1.96638	0.941902	1.40718	1.10499	1.95666
PTGDR2	2910	0.63549	1.00269	0.00639707	0.0424054	0	1.73175	3.034	1.27762	2.03322	1.59321	2.10114	0.595102	1.04261	0.439046	0.6987	0.547494	0.722042
TYMP	1857	0.634404	-0.852171	0.163497	0.359067	0	0.428474	0.700154	0.468462	0.968198	0.31087	0.176938	0.230734	0.377035	0.252268	0.521378	0.167404	0.0952819
NAPSA	1392	0.634054	-1.67121	0.196476	0.402219	0	0.0892653	0.291731	0.276818	0.503463	0.291441	0.199056	0.0641274	0.209577	0.198864	0.361683	0.209368	0.143
SCOC-AS1	2017	0.63399	2.57188	0.000187927	0.00350018	0	4.15976	6.84595	4.36521	7.61004	5.38194	7.12177	2.06235	3.39412	2.16421	3.77295	2.66829	3.53087
TCF7L1	2918	0.633414	-1.27525	0.241564	0.455934	0	0.196384	0.91409	0.383287	0.154912	0.31087	0.287525	0.0673008	0.313259	0.131353	0.0530883	0.106535	0.0985349
C11orf95	5582	0.633349	5.85763	1.66607e-05	0.0006309	0	41.5084	67.1175	43.5883	80.8639	51.2158	63.4103	7.43611	12.0239	7.80872	14.4866	9.17518	11.3598
PRR22	1392	0.631653	2.59357	0.000760486	0.00926716	0	4.53468	8.61578	5.11049	7.64877	4.48819	5.57356	3.25767	6.1895	3.67133	5.4948	3.22427	4.00399
MRPL54	623	0.631528	4.10765	4.54849e-05	0.00127585	0	12.3722	24.661	13.6706	19.1703	14.4749	18.8882	19.859	39.5842	21.9431	30.771	23.2342	30.3181
DFNA5	2564	0.630846	2.06031	0.000376476	0.00568568	0	2.80293	4.78438	3.30053	5.09272	3.65272	5.21968	1.09319	1.86598	1.28726	1.98624	1.42462	2.03576
CXXC4	5578	0.630118	0.219135	0.0308333	0.122068	0	0.999772	1.82818	0.851749	0.871379	0.796604	1.41551	0.179235	0.327748	0.152698	0.156217	0.142812	0.253766
MZF1-AS1	2606	0.630058	2.4683	0.0018695	0.0179245	0	4.53468	5.48454	4.10969	8.8687	4.29389	5.66203	1.74009	2.10458	1.57701	3.40318	1.64769	2.17269
NPB	704	0.629166	-0.486649	0.113922	0.285596	0	0.392768	0.816846	0.787868	1.21993	0.427446	0.398111	0.557908	1.16029	1.11913	1.73286	0.607168	0.565499
KPTN	1781	0.628756	3.98489	2.73424e-05	0.000898385	0	11.1403	20.7518	13.1808	20.0417	12.94	16.7428	6.25509	11.6518	7.40079	11.2531	7.26556	9.40078
RASD1	1746	0.627883	-0.361338	0.048326	0.163282	0	0.714123	1.20582	0.511049	0.852015	0.505164	0.619284	0.409005	0.690619	0.292697	0.487981	0.289326	0.354688
LOC100506100	576	0.627646	3.36567	4.44974e-05	0.00125279	0	7.65897	12.6611	8.04903	10.9406	8.5295	13.8675	13.2968	21.9811	13.974	18.9942	14.8082	24.0756
C16orf46	2226	0.626793	1.89238	0.00159445	0.0159414	0	3.15999	4.04533	2.93853	5.51873	2.56468	3.80418	1.41958	1.81731	1.3201	2.47921	1.15215	1.70897
LINC00638	2518	0.626383	2.99618	0.000859943	0.0101048	0	5.32021	7.585	6.452	11.7539	6.99458	9.59891	2.11287	3.01231	2.56235	4.66796	2.77783	3.81212
HIST1H2AD	510	0.62605	0.738596	0.00492435	0.0356034	0	1.30327	2.25605	1.32021	2.03322	1.22405	1.63668	2.55544	4.42363	2.58865	3.9867	2.4001	3.20918
KLF4	2933	0.625792	-0.302752	0.0229785	0.101198	0	0.607004	0.991884	0.596224	0.774559	0.62174	1.06163	0.206957	0.338181	0.203281	0.264084	0.211981	0.361961
ATP6V0A1	4161	0.625285	5.4265	1.11314e-06	8.75042e-05	0	32.4033	52.1615	32.6646	53.5801	36.3524	50.6929	7.78739	12.5358	7.85017	12.8767	8.73645	12.1829
OGDH	4840	0.624412	6.97547	1.49061e-06	0.000107515	0	92.3182	151.136	101.252	166.646	103.461	140.047	19.074	31.2264	20.9198	34.4311	21.3763	28.9353
RIPK1	3864	0.623869	5.27338	1.03664e-06	8.35693e-05	0	30.2252	48.3106	32.1322	45.4472	28.9109	46.8666	7.82227	12.5027	8.31579	11.7617	7.48212	12.129
CCDC13	2830	0.623724	-1.76469	0.197161	0.402805	0	0.178531	0.116692	0.212937	0.445371	0.213723	0.375994	0.063085	0.041234	0.0752428	0.157375	0.0755205	0.13286
KIAA1671	10494	0.623043	1.15737	0.00169577	0.0166683	0	1.57107	2.72282	1.95902	2.59477	1.67093	2.67619	0.149711	0.259464	0.18668	0.247262	0.159227	0.255021
C9orf172	2931	0.622975	2.10004	0.00155653	0.0156657	0	2.87434	5.29005	3.15147	5.92537	4.02188	4.2244	0.98067	1.80486	1.07522	2.02162	1.37219	1.44128
BAIAP3	5080	0.622508	1.3094	0.0013596	0.0140957	0	1.99954	2.72282	1.7035	3.09823	2.05951	3.0743	0.393611	0.535988	0.335334	0.609889	0.405416	0.605178
DYNLL2	1522	0.621506	6.23712	2.87957e-05	0.000933979	0	55.6837	88.8612	58.6855	107.993	63.8644	77.2778	36.5859	58.3845	38.5581	70.9546	41.9608	50.7739
GAB3	4842	0.620811	3.05808	2.84117e-05	0.000925239	0	6.76631	9.45208	6.452	10.4372	6.39226	10.2845	1.39742	1.9521	1.33251	2.15555	1.32017	2.12403
CYP21A1P	12988	0.620783	-1.61362	0.12994	0.311671	0	0.249943	0.369526	0.17035	0.445371	0.252582	0.221173	0.0192441	0.0284513	0.0131159	0.034291	0.0194473	0.017029
LOC728739	622	0.619661	-0.780615	0.084202	0.235706	0	0.392768	0.408423	0.532343	0.92947	0.369158	0.641402	0.631459	0.656629	0.855857	1.49433	0.593502	1.03119
SPTBN5	11723	0.618964	-1.32208	0.155166	0.348158	0	0.214237	0.252833	0.191644	0.600283	0.446876	0.464463	0.0182749	0.0215673	0.0163477	0.0512056	0.0381196	0.0396198
ATXN1	10636	0.618414	5.01102	1.1996e-06	9.22354e-05	0	24.4587	37.361	25.446	39.7542	26.3462	39.9438	2.29961	3.51269	2.39244	3.7377	2.47708	3.75553
CACFD1	2880	0.618081	4.92806	2.72212e-05	0.000897498	0	23.1197	43.2345	25.084	35.7072	23.801	31.495	8.02768	15.012	8.70972	12.3983	8.26423	10.9358
C1orf56	2028	0.617407	-1.00168	0.063178	0.194094	0	0.321355	0.466769	0.447168	0.658375	0.330299	0.552933	0.158459	0.230162	0.220497	0.324642	0.16287	0.272649
PPP4R1-AS1	587	0.617097	-0.766001	0.0517631	0.170669	0	0.446327	0.855743	0.404581	0.561555	0.446876	0.57505	0.760352	1.45783	0.689235	0.956653	0.761287	0.979642
LOC101060553	4071	0.615684	0.313428	0.0118155	0.0647268	0	0.946213	1.34196	1.08598	1.35548	0.835463	1.70303	0.232428	0.329639	0.26676	0.332959	0.205223	0.418333
RRAS	986	0.615596	3.4911	5.88058e-05	0.00150971	0	8.08744	14.1976	8.28326	12.5672	10.2004	13.956	8.20227	14.3991	8.40087	12.7457	10.3453	14.1542
CCR9	2653	0.61459	2.06923	0.000234704	0.00408929	0	3.32067	4.92052	3.30053	5.38318	3.24471	4.79945	1.25167	1.8547	1.24407	2.02909	1.22303	1.80907
MIR4635	158	0.614145	-1.24043	0.0808615	0.229151	0	0.303502	0.350077	0.276818	0.503463	0.330299	0.552933	1.9209	2.21568	1.75202	3.18648	2.0905	3.49957
CCDC87	2915	0.613672	1.12133	0.00211868	0.0197365	0	1.73175	2.43109	1.85255	2.73032	1.49606	2.60984	0.594082	0.833993	0.635524	0.936645	0.513229	0.895314
GLIS2-AS1	718	0.613233	-1.29757	0.0924732	0.250232	0	0.303502	0.486218	0.298112	0.309823	0.272011	0.552933	0.422705	0.677184	0.415198	0.431509	0.378846	0.770101
LOC102723780	1006	0.613133	-0.91981	0.0769014	0.221609	0	0.46418	0.408423	0.3407	0.774559	0.349729	0.597167	0.461411	0.405987	0.338668	0.769939	0.347643	0.593605
FZD9	2342	0.611817	-0.0325922	0.0240227	0.103993	0	0.714123	1.16692	0.574931	1.23929	0.93261	0.995279	0.30492	0.498259	0.245487	0.52916	0.398211	0.424969
LOC101928336	2909	0.611707	-1.5823	0.104481	0.271198	0	0.214237	0.291731	0.255525	0.387279	0.233153	0.398111	0.0736462	0.100286	0.0878394	0.133131	0.0801487	0.136855
ABHD16B	1776	0.611574	-2.13224	0.178733	0.380341	0	0.107118	0.194487	0.17035	0.251732	0.174864	0.24329	0.0603144	0.109509	0.0959177	0.141741	0.0984597	0.136988
SAMD15	2025	0.611262	0.322422	0.0151588	0.0767926	0	1.05333	1.18637	0.787868	1.54912	1.02976	1.68091	0.520163	0.585863	0.38907	0.764996	0.508522	0.830081
NCAM1	8527	0.610641	1.71293	0.000779787	0.00944159	0	2.60655	3.92864	2.3636	4.2988	2.72011	3.51665	0.305682	0.460729	0.27719	0.50414	0.319	0.412414
RABL2A	2218	0.610587	3.08235	5.55963e-05	0.00146586	0	6.9627	9.7827	6.19647	11.1536	6.85857	9.64314	3.13918	4.4106	2.79372	5.02869	3.09223	4.34767
HIST2H2BA	515	0.609942	1.08481	0.0191231	0.0898162	0	1.24971	3.01455	2.3636	2.53668	1.37949	1.99056	2.42663	5.8535	4.58952	4.92559	2.67861	3.86516
KCNJ5	2899	0.609873	-1.08006	0.0761109	0.220031	0	0.321355	0.622359	0.425874	0.406643	0.291441	0.552933	0.11085	0.214681	0.146904	0.14027	0.100531	0.190732
RELB	2275	0.609419	3.62965	0.00013314	0.00274005	0	9.42642	17.9123	10.4339	13.7291	9.48154	13.0713	4.14348	7.87352	4.58634	6.03475	4.16771	5.74564
VWA8-AS1	2079	0.608465	-0.805881	0.0522903	0.171629	0	0.339208	0.700154	0.489756	0.677739	0.446876	0.552933	0.163159	0.336774	0.235573	0.325993	0.214947	0.265961
ARMC12	1224	0.608289	0.48622	0.0148394	0.0757573	0	1.24971	1.75038	0.766574	1.47166	1.20462	1.72515	1.02101	1.43005	0.626286	1.20234	0.984168	1.40944
ARID3C	1239	0.607168	-0.346012	0.0532913	0.173555	0	0.46418	0.875192	0.74528	1.1812	0.582881	0.641402	0.374641	0.70637	0.601518	0.953351	0.470445	0.517677
TMEM59L	1619	0.6063	0.263107	0.0253059	0.107757	0	0.999772	1.45865	1.14986	1.54912	0.62174	1.19433	0.617524	0.90096	0.710229	0.956836	0.384027	0.737699
ZYG11B	8142	0.605913	5.88582	1.41674e-06	0.000102676	0	47.8284	67.0592	44.2058	72.886	48.554	74.0708	5.87428	8.2362	5.42935	8.95185	5.9634	9.09738
METTL12	1382	0.605466	1.50308	0.00872769	0.0526058	0	1.7496	3.8314	2.66172	3.85343	2.27324	2.41079	1.26599	2.77236	1.92599	2.7883	1.64489	1.74442
SNORA76C	133	0.605234	0.133081	0.0182513	0.0869347	0	0.999772	1.30306	0.851749	1.37484	0.660599	1.1501	7.51708	9.79747	6.40413	10.3372	4.96691	8.64737
RHBDL3	4661	0.605194	-0.991425	0.0728452	0.213627	0	0.392768	0.44732	0.404581	0.522827	0.31087	0.729871	0.0842668	0.0959709	0.0868013	0.112171	0.066696	0.156591
DNAJC18	5102	0.605107	4.19299	5.25026e-06	0.000270496	0	14.8359	22.191	13.5854	21.1455	15.0189	22.7808	2.90786	4.34947	2.66276	4.14454	2.94373	4.46508
LOC101928150	3470	0.603737	-0.946457	0.112295	0.283299	0	0.339208	0.369526	0.255525	0.755195	0.544023	0.619284	0.0977546	0.106492	0.0736382	0.217635	0.156779	0.178468
ABCA7	6818	0.603646	6.5981	1.15192e-05	0.000486021	0	75.3578	109.088	73.3143	135.548	81.9531	105.787	11.0528	16	10.753	19.8809	12.0201	15.5158
CCDC103	1799	0.603284	0.916104	0.00535347	0.0375238	0	1.42825	2.64503	1.3415	2.07194	1.63207	1.96844	0.793911	1.47028	0.745695	1.15172	0.907208	1.09419
GOLGA6L4	9126	0.602395	-2.35708	0.333356	0.551058	0	0.0892653	0.0972436	0.255525	0.232368	0.0388588	0.24329	0.00978143	0.0106557	0.0279996	0.0254622	0.00425803	0.026659
KCNJ1	2908	0.60143	-1.65633	0.159929	0.354412	0	0.23209	0.388974	0.319406	0.348551	0.116576	0.265408	0.0798108	0.13376	0.109837	0.119859	0.0400881	0.0912681
PTCHD2	5214	0.60106	3.4088	2.97796e-05	0.000955661	0	8.96224	12.525	8.56008	13.4386	7.71346	12.3193	1.71888	2.40218	1.64175	2.57741	1.47938	2.36274
LPP-AS2	2883	0.600173	1.51297	0.00686368	0.0444026	0	2.35661	4.04533	2.74689	3.02078	1.63207	3.11854	0.817414	1.40317	0.952789	1.04779	0.5661	1.0817
SERPINB9P1	1252	0.598888	-0.741057	0.0590448	0.185089	0	0.535592	0.525115	0.425874	0.755195	0.369158	0.751988	0.427789	0.419421	0.340155	0.603191	0.294855	0.60063
HIST2H2AC	437	0.598624	8.45929	5.317e-06	0.000273006	0	248.015	458.931	298.687	391.307	293.189	421.512	567.54	1050.19	683.494	895.439	670.914	964.557
CGREF1	2698	0.598536	1.80569	0.000719163	0.00890692	0	2.44587	4.43431	2.87465	4.02771	2.95327	4.04747	0.906549	1.64355	1.06548	1.49285	1.09461	1.50017
ATP1A1-AS1	2635	0.598429	2.41723	0.000528825	0.00720619	0	3.89197	5.54288	4.23745	7.37767	4.54647	6.2592	1.47703	2.10356	1.60814	2.79988	1.72542	2.37541
ROGDI	1741	0.598232	4.29167	0.00015559	0.00306466	0	14.0325	25.6529	14.8843	25.696	17.7584	19.2421	8.06003	14.7346	8.54929	14.7593	10.2001	11.0523
PHTF1	3244	0.598026	0.524644	0.0167468	0.082198	0	1.21401	1.34196	1.06469	1.54912	1.06862	2.21173	0.374232	0.413675	0.328202	0.477533	0.329413	0.681791
NOS1	12534	0.597984	-2.09145	0.168382	0.366032	0	0.160678	0.213936	0.149056	0.232368	0.155435	0.265408	0.0128193	0.0170684	0.0118921	0.018539	0.0124011	0.021175
CHN2	4764	0.596956	3.95178	4.14303e-05	0.0011999	0	12.39	15.9674	11.7754	19.151	12.7068	20.7018	2.60076	3.35168	2.47175	4.01993	2.66726	4.34546
C11orf72	2431	0.596678	-1.18642	0.132394	0.315458	0	0.214237	0.680705	0.319406	0.445371	0.427446	0.309642	0.088127	0.28001	0.131389	0.183205	0.175831	0.127372
KCNH3	3853	0.596607	-0.885117	0.0915714	0.248617	0	0.410621	0.544564	0.234231	0.735831	0.544023	0.530815	0.106572	0.141335	0.0607918	0.190976	0.141195	0.137767
ANKRD20A19P	5096	0.59603	5.01849	7.5116e-05	0.00179744	0	27.6544	38.3918	29.3215	39.8123	20.4008	38.7274	5.42669	7.53371	5.75382	7.81246	4.00331	7.59957
FAM27E2	1767	0.594767	-0.129653	0.0417329	0.148317	0	0.714123	1.01133	0.511049	1.31675	0.854893	0.81834	0.404144	0.572345	0.289219	0.745189	0.48381	0.463124
FBLN2	4665	0.594602	7.81832	1.90048e-06	0.000129404	0	172.532	293.714	188.258	273.942	178.692	246.918	36.9844	62.9613	40.3554	58.7228	38.3048	52.9298
SNAPIN	1052	0.593909	4.4956	2.07049e-05	0.000728547	0	15.8178	29.4843	18.8237	25.2893	19.2545	26.5186	15.0359	28.0269	17.8932	24.0393	18.3028	25.2078
NCOA5	3207	0.593909	6.23101	9.01133e-06	0.000405029	0	56.2193	86.8774	59.516	102.067	63.8061	81.9888	17.5302	27.0899	18.5581	31.8265	19.8959	25.5656
COL6A2	4342	0.593823	3.16928	0.000126767	0.00263394	0	6.92699	11.5136	7.83609	11.4247	6.68371	9.37774	1.59535	2.65169	1.80472	2.63122	1.53931	2.15977
TEN1-CDK3	3330	0.593577	0.207464	0.0221518	0.0988899	0	0.999772	1.4781	0.681399	1.4523	0.971469	1.08375	0.300232	0.443875	0.204624	0.436125	0.291732	0.32545
FAM180B	1403	0.592408	-1.78282	0.153033	0.344786	0	0.267796	0.330628	0.191644	0.309823	0.136006	0.265408	0.190874	0.235658	0.136596	0.220829	0.0969392	0.189171
MIR325HG	1403	0.59169	0.0810599	0.0470847	0.160774	0	1.05333	1.24472	0.936924	1.20057	0.446876	1.23857	0.750771	0.887183	0.6678	0.855713	0.318514	0.8828
UBE2D4	3982	0.591689	3.96978	8.55512e-06	0.000391494	0	12.64	18.379	12.2652	19.9836	12.5125	18.0256	3.17428	4.61553	3.08016	5.01849	3.14227	4.52677
MIR4441	100	0.591554	-1.78024	0.196011	0.401661	0	0.107118	0.291731	0.191644	0.232368	0.31087	0.398111	1.07118	2.91731	1.91644	2.32368	3.1087	3.98111
TRIM69	3822	0.590523	-0.356783	0.0802005	0.227971	0	0.517739	0.797397	0.361993	0.774559	0.893751	1.12798	0.135463	0.208634	0.0947131	0.202658	0.233844	0.295129
LYST	16733	0.590464	5.56984	1.94607e-05	0.00070017	0	39.7588	48.5051	35.4115	62.4488	38.4702	60.2254	2.37607	2.89877	2.11626	3.73207	2.29906	3.5992
KIAA1875	7119	0.589382	2.18693	0.000366911	0.00560807	0	3.96338	5.29005	3.42829	5.73173	3.41957	5.26392	0.556733	0.743089	0.481569	0.805132	0.480344	0.739418
CNFN	528	0.588511	1.48865	0.0085273	0.0518519	0	1.62463	3.96754	2.25713	2.98205	2.7784	3.03007	3.07695	7.51428	4.27488	5.64782	5.26212	5.73877
LOC400997	3212	0.587482	-1.37122	0.137317	0.323373	0	0.339208	0.252833	0.255525	0.561555	0.233153	0.442346	0.105607	0.0787152	0.0795531	0.17483	0.072588	0.137717
DGCR6	2428	0.58747	0.0938321	0.0184727	0.0877409	0	0.803388	1.20582	0.787868	1.43293	0.874322	1.06163	0.330885	0.496631	0.324492	0.59017	0.3601	0.437245
GOLGA8N	26631	0.587374	-1.5672	0.184484	0.386712	0	0.285649	0.194487	0.234231	0.329187	0.194294	0.57505	0.0107262	0.00730304	0.00879542	0.0123611	0.00729577	0.0215932
DDX26B-AS1	398	0.58583	-1.43318	0.13298	0.316209	0	0.321355	0.427872	0.298112	0.29046	0.174864	0.486581	0.807425	1.07505	0.749025	0.729798	0.439358	1.22256
ANKRD30BL	2168	0.584928	-0.546912	0.701834	0.835877	0	0.249943	2.06156	1.12857	0.135548	0.213723	0.0884692	0.115287	0.950906	0.520557	0.062522	0.0985808	0.0408068
ABAT	5930	0.584016	3.81129	0.000107923	0.00234536	0	11.301	16.0452	9.98676	19.2091	12.3182	15.1282	1.90573	2.70577	1.68411	3.2393	2.07727	2.55114
HMCN1	18212	0.583709	-0.825287	0.0835032	0.234436	0	0.517739	0.739051	0.425874	0.697103	0.31087	0.442346	0.0284285	0.0405805	0.0233843	0.0382771	0.0170695	0.0242887
RABEP2	2280	0.583522	4.50251	3.7845e-05	0.00112621	0	18.6386	29.3092	17.9719	29.3558	17.739	22.7366	8.17483	12.8549	7.88241	12.8753	7.78027	9.97219
CEP19	2202	0.58231	3.40683	0.000453129	0.00647504	0	7.96247	10.8718	7.36763	14.1938	10.0644	12.9829	3.61602	4.93725	3.34588	6.44586	4.57058	5.89594
ATP2B1	6933	0.582298	4.44916	0.000957098	0.0109287	0	17.3175	18.593	16.8433	29.9173	18.2442	30.0132	2.49783	2.68181	2.42944	4.31521	2.6315	4.32903
HIST1H1T	725	0.581119	1.36832	0.00482303	0.0351059	0	1.80316	3.26738	2.57654	3.09823	1.76807	2.78678	2.48712	4.50674	3.55385	4.27343	2.43872	3.84383
H3F3C	1057	0.580494	-0.275846	0.0580628	0.182957	0	0.553445	1.26417	0.74528	0.910106	0.602311	0.641402	0.5236	1.19599	0.70509	0.861028	0.56983	0.606813
CCDC30	3098	0.58013	-0.517145	0.206598	0.415198	0	0.23209	0.350077	0.681399	1.29739	0.699458	0.729871	0.074916	0.113001	0.219948	0.418782	0.225777	0.235594
LMNTD2	4196	0.578642	2.68779	0.000218848	0.00389528	0	5.23095	7.5072	4.89756	8.52015	5.28479	6.98907	1.24665	1.78913	1.1672	2.03054	1.25948	1.66565
LOC654841	2502	0.57799	0.0645894	0.0270102	0.111886	0	0.749829	0.933538	0.766574	1.37484	0.913181	1.32704	0.299692	0.373117	0.306385	0.549497	0.36498	0.530391
LFNG	3155	0.577968	0.493943	0.010575	0.0599329	0	1.19616	1.63369	1.14986	1.74276	0.952039	1.54821	0.37913	0.51781	0.364457	0.552379	0.301756	0.490717
NBN	4724	0.577306	6.33515	3.27324e-05	0.00102016	0	68.0916	81.529	61.0491	97.788	65.1467	110.675	14.414	17.2585	12.9232	20.7003	13.7906	23.4282
DNAH1	13110	0.577305	5.59454	9.34343e-06	0.000414267	0	41.0264	55.9734	41.1608	60.9384	34.0791	56.5539	3.12939	4.26952	3.13965	4.64824	2.59948	4.3138
SMIM1	573	0.577107	-1.17571	0.0956248	0.255639	0	0.285649	0.564013	0.276818	0.484099	0.408017	0.398111	0.498515	0.984315	0.483104	0.84485	0.712071	0.694784
SNORD105B	92	0.576294	-2.09179	0.310047	0.528088	0	0.0535592	0.311179	0.212937	0.29046	0.213723	0.0884692	0.582165	3.38239	2.31454	3.15717	2.32308	0.961622
ZFY	5616	0.574047	3.97141	7.21575e-05	0.00176277	0	13.0684	16.687	12.0735	17.8148	12.5902	21.7413	2.327	2.97133	2.14985	3.17216	2.24185	3.87132
FAM195B	1421	0.573346	5.73945	3.75868e-05	0.00112072	0	38.2948	71.8824	44.1419	63.843	46.3585	55.8241	26.9492	50.5858	31.064	44.9282	32.6238	39.2851
LZTS3	4101	0.573212	3.66975	5.80329e-05	0.00150518	0	10.1584	16.4342	10.1358	15.8978	10.317	13.1819	2.47705	4.00736	2.47155	3.87657	2.51573	3.21432
LOC102606465	1326	0.573122	2.06911	0.00362735	0.0287663	0	3.62417	3.8314	2.89595	6.04156	3.49729	5.06486	2.73316	2.88944	2.18397	4.55623	2.63747	3.81965
ANKHD1-EIF4EBP3	8349	0.572886	0.269585	0.0225021	0.0997482	0	0.856947	1.06968	0.958218	1.56848	1.01033	1.57033	0.102641	0.128121	0.11477	0.187865	0.121012	0.188086
FLJ30679	1980	0.571917	-1.40794	0.137491	0.323632	0	0.285649	0.525115	0.276818	0.251732	0.252582	0.442346	0.144267	0.26521	0.139807	0.127137	0.127567	0.223407
ACTA1	1492	0.571162	0.254916	0.0216192	0.0974601	0	0.785535	1.36141	1.17115	1.29739	0.854893	1.50398	0.526498	0.912473	0.784956	0.869562	0.572984	1.00803
TPI1P2	2017	0.571132	2.08298	0.000519473	0.0071079	0	3.12429	5.3095	3.51346	4.93781	3.51672	4.82157	1.54898	2.63237	1.74193	2.4481	1.74354	2.39047
SH3PXD2B	7977	0.571041	5.19784	2.59162e-06	0.000165634	0	30.2431	44.6542	28.8743	45.1955	29.3966	41.6469	3.79129	5.59788	3.61969	5.66573	3.68518	5.22087
LOC401242	22275	0.57104	-1.32302	0.128419	0.309296	0	0.392768	0.330628	0.255525	0.503463	0.213723	0.464463	0.0176327	0.014843	0.0114714	0.0226022	0.00959475	0.0208513
CLDN9	2050	0.570805	-0.572973	0.119396	0.294063	0	0.624857	0.719602	0.319406	1.08438	0.563452	0.442346	0.304808	0.351026	0.155808	0.528967	0.274855	0.215779
LOC285484	1485	0.570377	1.55489	0.00250256	0.0221416	0	2.53514	3.40353	2.0442	3.91152	2.40924	3.0743	1.70716	2.29194	1.37656	2.63402	1.62239	2.07024
SEMA3B	3367	0.569844	1.97617	0.00366243	0.0289534	0	3.17785	5.2706	3.83287	4.22134	2.42867	4.48981	0.943821	1.56537	1.13836	1.25374	0.721316	1.33348
IKZF3	10008	0.569546	4.65914	3.58423e-06	0.000204307	0	20.7453	30.3594	20.4846	30.8081	19.7208	29.2833	2.07287	3.03352	2.04682	3.07834	1.97051	2.92599
NBAT1	2295	0.569029	1.68382	0.00372165	0.0292925	0	2.37446	3.034	2.47007	4.49244	2.83669	3.87053	1.03462	1.322	1.07628	1.95749	1.23603	1.6865
C10orf12	4545	0.568625	5.82872	4.39063e-06	0.000236842	0	44.6327	61.5746	45.6112	70.601	47.0191	71.4168	9.82017	13.5478	10.0355	15.5338	10.3452	15.7133
MCPH1-AS1	4132	0.568205	0.967273	0.0140905	0.0729673	0	1.10689	2.13936	1.78867	2.6335	1.76807	2.10114	0.267882	0.517754	0.432883	0.637343	0.427898	0.508505
CHKB-AS1	1019	0.568145	2.61778	0.000343869	0.00534762	0	4.46327	7.11823	5.51507	7.78431	4.79906	6.96695	4.38005	6.9855	5.41224	7.63917	4.70957	6.83705
HIST2H3D	457	0.566572	7.17839	4.49561e-06	0.000239771	0	104.03	179.667	124.781	174.431	121.453	164.553	227.636	393.145	273.044	381.686	265.762	360.072
PRKXP1	11532	0.566215	4.29069	4.29345e-05	0.00123054	0	16.2106	20.2267	14.9695	25.8122	16.0681	23.953	1.4057	1.75396	1.29808	2.23831	1.39335	2.07709
LHPP	1685	0.564579	4.7686	5.97122e-05	0.0015261	0	19.3884	36.1552	24.4452	32.0474	22.1106	29.217	11.5065	21.4571	14.5075	19.0192	13.122	17.3394
DCXR	829	0.564481	5.21114	9.92948e-06	0.000435947	0	28.6542	48.7774	29.8538	43.0074	31.087	40.6737	34.5647	58.8388	36.0118	51.8786	37.4994	49.0636
SNORD101	73	0.564179	0.650464	0.0133068	0.0703026	0	1.51751	1.67259	1.12857	1.91703	1.04919	1.90209	20.7878	22.9122	15.4598	26.2607	14.3724	26.056
GLI3	8214	0.56396	5.62003	3.47406e-06	0.000200082	0	36.9201	59.2019	41.1182	60.3575	40.9766	56.3328	4.49478	7.20744	5.00587	7.34812	4.98862	6.85814
VWA5B2	4020	0.562711	3.41268	0.000241529	0.00417154	0	8.85512	13.3613	8.19808	14.1357	8.64607	10.4394	2.20277	3.3237	2.03932	3.51634	2.15076	2.59686
STAU2	5903	0.561303	6.5898	2.49524e-05	0.000839898	0	75.2864	96.4656	77.4453	122.496	80.6513	125.449	12.7539	16.3418	13.1196	20.7516	13.6628	21.2518
COQ7	2753	0.560585	4.36993	1.35658e-05	0.000543602	0	16.9961	24.9527	17.2053	22.772	15.8544	26.1205	6.17367	9.06382	6.24967	8.27171	5.75894	9.48802
LINC00240	977	0.560432	-2.15452	0.359049	0.575908	0	0.178531	0.311179	0.255525	0.232368	0.0194294	0.110587	0.182734	0.318505	0.26154	0.237838	0.0198868	0.11319
HIST1H3H	473	0.560278	8.98669	3.68729e-05	0.00110816	0	356.972	678.916	423.703	588.936	449.324	545.744	754.698	1435.34	895.777	1245.11	949.944	1153.79
PSMA3-AS1	2608	0.560017	5.64627	0.000147441	0.00295018	0	47.0607	53.5229	41.1395	61.3838	33.1465	64.0738	18.0447	20.5226	15.7743	23.5367	12.7096	24.5682
CYP27A1	2293	0.559921	-1.03922	0.1223	0.299317	0	0.303502	0.544564	0.3407	0.348551	0.446876	0.729871	0.13236	0.23749	0.148582	0.152007	0.194887	0.318304
KIAA1656	7605	0.559907	3.0946	0.000334301	0.00524187	0	7.05196	10.5412	7.06952	11.3666	6.50884	8.47093	0.92728	1.38609	0.929588	1.49463	0.855863	1.11386
FBXO15	1850	0.55944	0.649034	0.0251376	0.107309	0	1.03548	1.45865	1.10727	2.24622	1.57378	1.76938	0.559718	0.788461	0.598526	1.21417	0.850692	0.956424
CISD2	5891	0.559378	4.37519	2.01936e-05	0.000717124	0	17.1747	23.3968	15.7786	23.5272	17.2921	27.1822	2.91541	3.97162	2.67843	3.99376	2.93535	4.61418
TINF2	2177	0.558854	6.14819	5.05019e-06	0.00026287	0	54.1841	89.4057	55.8534	81.3868	61.9603	82.5639	24.8893	41.0683	25.6561	37.3848	28.4613	37.9255
SNORD68	72	0.558745	-0.194903	0.0376926	0.139048	0	0.571298	0.875192	0.787868	1.14247	0.680028	0.973161	7.9347	12.1554	10.9426	15.8677	9.44484	13.5161
EEF1DP3	575	0.558063	-0.822526	0.0817099	0.230734	0	0.410621	0.661256	0.3407	0.503463	0.524593	0.729871	0.714123	1.15001	0.592521	0.875588	0.912336	1.26934
ZSCAN12P1	4055	0.55786	-1.395	0.198866	0.405231	0	0.392768	0.350077	0.191644	0.251732	0.233153	0.641402	0.09686	0.0863321	0.047261	0.0620793	0.0574975	0.158176
TLR5	4267	0.55639	3.04553	0.000972505	0.0110673	0	6.28428	9.84105	7.02693	7.82304	6.68371	11.7664	1.47276	2.30632	1.64681	1.83338	1.56637	2.75754
FKRP	3474	0.556063	3.35917	0.000214539	0.00385483	0	8.35524	13.653	8.58137	12.5285	7.90776	10.3067	2.40508	3.93005	2.47017	3.60636	2.27627	2.9668
NUTM2A	3288	0.555692	0.350247	0.0382543	0.140428	0	1.1783	1.94487	1.0221	1.1812	0.796604	1.2828	0.358365	0.591506	0.310857	0.359246	0.242276	0.390147
LOC101927359	2822	0.555119	-2.11247	0.222646	0.435653	0	0.196384	0.213936	0.17035	0.251732	0.0971469	0.221173	0.0695903	0.07581	0.0603649	0.0892033	0.0344248	0.0783746
LINC00526	1306	0.554471	-1.60947	0.194765	0.400559	0	0.142825	0.233385	0.319406	0.348551	0.252582	0.464463	0.10936	0.178702	0.244568	0.266885	0.193401	0.355638
NAGK	1801	0.554089	5.04311	2.02103e-05	0.000717124	0	25.0657	40.2588	26.7875	42.4071	28.2309	34.8569	13.9177	22.3536	14.8737	23.5464	15.6751	19.3542
TMEM191A	1958	0.553814	0.85169	0.00797132	0.0494437	0	1.41039	2.41164	1.46927	2.07194	1.41834	1.81362	0.720323	1.23169	0.750392	1.05819	0.724384	0.926261
BCRP3	1425	0.553279	0.423102	0.0674751	0.202867	0	1.07118	0.991884	1.06469	2.38177	1.02976	1.26069	0.751708	0.696059	0.747148	1.67142	0.722636	0.884692
APLF	3849	0.551941	4.21106	2.95639e-05	0.000952776	0	15.2822	19.8182	14.7566	22.0168	14.9412	24.1521	3.97044	5.14893	3.83387	5.72014	3.88184	6.2749
IQUB	3883	0.550499	-0.767885	0.10698	0.275442	0	0.589151	0.875192	0.361993	0.561555	0.369158	0.508698	0.151726	0.225391	0.0932252	0.144619	0.0950703	0.131006
ING5	5198	0.549104	5.48942	1.69318e-05	0.000637402	0	39.0982	56.868	36.9233	54.6258	33.3214	48.4811	7.52178	10.9404	7.10337	10.509	6.41042	9.32688
AK1	2266	0.548589	1.91517	0.000893492	0.0103548	0	3.23141	4.37596	2.81077	4.43435	3.05041	4.51193	1.42604	1.93114	1.24041	1.95691	1.34617	1.99114
LOC100507053	4825	0.548484	1.71995	0.00498903	0.0359222	0	2.16022	3.34518	3.19406	4.26007	2.62297	4.02535	0.447714	0.693301	0.661981	0.882917	0.54362	0.834269
TCP11	2136	0.547736	-1.58406	0.197934	0.403732	0	0.285649	0.525115	0.191644	0.213004	0.233153	0.309642	0.133731	0.24584	0.0897207	0.0997208	0.109154	0.144964
H3F3B	2861	0.547239	9.00151	1.68585e-06	0.000117676	0	417.155	631.539	417.485	572.496	414.72	621.651	145.807	220.741	145.923	200.103	144.956	217.285
ARAF	3129	0.546118	6.08992	1.23013e-05	0.000507706	0	53.095	89.6586	56.8968	79.4891	56.0732	73.2746	16.9687	28.6541	18.1837	25.404	17.9205	23.4179
GPT	1886	0.5461	-1.16514	0.166319	0.363211	0	0.374914	0.350077	0.404581	0.716467	0.213723	0.375994	0.198788	0.185619	0.214518	0.379887	0.113321	0.199361
GPR35	2596	0.545971	1.17888	0.0085187	0.0518412	0	1.82101	2.21715	1.6822	3.25315	1.92351	2.45502	0.701469	0.854065	0.647999	1.25314	0.740951	0.945694
NTRK1	2857	0.545259	-1.21881	0.149054	0.339369	0	0.357061	0.60291	0.404581	0.367915	0.194294	0.420229	0.124978	0.211029	0.14161	0.128777	0.0680062	0.147087
KATNAL2	2833	0.544936	2.14438	0.000829069	0.00988033	0	3.26711	5.50399	3.91805	5.11209	3.53615	4.99851	1.15323	1.94281	1.383	1.80448	1.2482	1.76439
SGK1	3965	0.544381	1.97643	0.00110165	0.0121006	0	3.01717	4.41486	3.02371	4.97654	3.47786	4.48981	0.76095	1.11346	0.7626	1.25512	0.87714	1.13236
LINC00202-1	3620	0.544294	0.909803	0.0138922	0.0722533	0	1.60678	1.67259	1.42668	2.61414	1.4572	2.27808	0.443861	0.462041	0.39411	0.722137	0.402542	0.629304
SMPD3	5269	0.543701	0.98779	0.01824	0.0869083	0	1.89243	2.62558	1.21374	2.47859	1.61264	1.7915	0.359162	0.498306	0.230355	0.47041	0.306062	0.340008
MOB3B	6525	0.543329	-1.29963	0.15158	0.342837	0	0.267796	0.388974	0.319406	0.619647	0.31087	0.287525	0.0410415	0.0596129	0.0489511	0.094965	0.0476429	0.0440651
TMEM53	2363	0.542984	2.64876	0.000540285	0.00731994	0	4.65965	8.16846	5.32343	6.62248	5.26536	7.4093	1.97192	3.45682	2.25283	2.80257	2.22825	3.13555
MYL5	661	0.542827	3.40282	5.84956e-05	0.00150548	0	8.90868	12.525	8.8369	12.4317	8.0049	12.5626	13.4776	18.9485	13.369	18.8074	12.1103	19.0055
AKAP3	3340	0.542734	1.13234	0.0092493	0.0546622	0	2.10666	2.43109	1.42668	2.38177	1.70979	2.87525	0.630737	0.727871	0.42715	0.713104	0.511912	0.860853
TNFRSF6B	1155	0.542401	-0.792067	0.110304	0.280144	0	0.482033	0.739051	0.255525	0.639011	0.563452	0.530815	0.417344	0.639871	0.221233	0.553256	0.487837	0.45958
RAET1E-AS1	1376	0.542177	-1.07286	0.123103	0.300651	0	0.410621	0.700154	0.276818	0.426007	0.369158	0.420229	0.298416	0.508833	0.201176	0.309598	0.268284	0.305399
ZDHHC11	2606	0.541095	1.03038	0.0196719	0.0914449	0	1.62463	2.13936	1.27762	2.98205	1.9818	1.99056	0.623419	0.820936	0.490262	1.1443	0.760474	0.763836
BAIAP2	4897	0.539988	3.11963	0.000695962	0.00871628	0	6.65919	10.8718	7.66574	11.5022	6.85857	8.36034	1.35985	2.2201	1.5654	2.34883	1.40057	1.70724
ANTXR1	7123	0.539608	5.35217	1.57223e-05	0.000609067	0	31.5821	45.5489	34.3042	53.5995	33.9431	45.9155	4.43382	6.39462	4.81597	7.52484	4.76528	6.44609
RNVU1-14	164	0.539454	1.21468	0.00719249	0.0459101	0	1.82101	3.17014	2.08678	2.34304	1.69036	2.60984	11.1037	19.3301	12.7243	14.2868	10.307	15.9137
ADCK1	2234	0.539395	2.89583	0.000460145	0.00651385	0	5.89151	7.68224	6.13259	10.0693	6.10082	8.58151	2.6372	3.43878	2.74512	4.50728	2.7309	3.84132
STIM2	5246	0.538878	5.4569	8.99783e-06	0.000405029	0	35.3134	47.3965	36.0929	52.883	35.9638	55.7356	6.73148	9.03479	6.88007	10.0806	6.85547	10.6244
RNASEK-C17orf49	1909	0.538104	-1.93695	0.211301	0.421409	0	0.178531	0.213936	0.149056	0.232368	0.213723	0.353877	0.0935205	0.112067	0.0780807	0.121722	0.111956	0.185373
TSSK4	1392	0.538066	-1.3954	0.125026	0.303527	0	0.267796	0.427872	0.255525	0.348551	0.31087	0.442346	0.192382	0.307379	0.183567	0.250396	0.223326	0.317777
SHB	6021	0.536149	4.02665	8.14031e-05	0.00190574	0	13.1756	21.0046	13.0531	20.0417	13.6006	16.6764	2.18827	3.48856	2.16792	3.32863	2.25885	2.76971
CRB3	1106	0.534666	-0.242092	0.055898	0.178777	0	0.678417	0.797397	0.553637	1.20057	0.738316	0.862575	0.613397	0.720974	0.500576	1.0855	0.667555	0.779905
LOC101929577	3526	0.534607	-1.93685	0.201695	0.409362	0	0.178531	0.252833	0.191644	0.213004	0.174864	0.33176	0.0506326	0.0717054	0.0543515	0.0604094	0.0495928	0.0940895
TNFAIP8L2	1178	0.534364	0.481003	0.0191113	0.0897886	0	1.19616	1.71149	0.979511	1.37484	1.14633	1.74727	1.01541	1.45288	0.831504	1.1671	0.973118	1.48325
ZFHX2	9182	0.534362	4.88087	0.045576	0.157156	0	21.2273	26.9948	22.6991	48.255	28.2115	29.1506	2.31184	2.93997	2.47213	5.25539	3.07247	3.17476
ST7-OT4	1572	0.53349	0.330235	0.0380595	0.139992	0	1.24971	1.30306	0.894336	1.25866	0.835463	1.7915	0.794984	0.828921	0.568916	0.800673	0.531465	1.13963
SNORD100	76	0.532852	-0.174566	0.0573296	0.181702	0	0.678417	0.739051	0.702693	1.29739	0.699458	0.973161	8.92653	9.72436	9.24596	17.0709	9.20339	12.8048
ZNF329	3413	0.532689	-0.753634	0.115372	0.287567	0	0.392768	0.466769	0.553637	0.600283	0.427446	0.928927	0.11508	0.136762	0.162214	0.175881	0.125241	0.272173
SSTR2	2964	0.532242	-0.178038	0.0444837	0.154663	0	0.660564	0.933538	0.660105	0.871379	0.757746	1.21645	0.222862	0.314959	0.222708	0.293987	0.25565	0.410409
AXDND1	3862	0.531986	-0.511037	0.0870155	0.240192	0	0.571298	0.525115	0.553637	0.832651	0.505164	1.0174	0.147928	0.13597	0.143355	0.215601	0.130804	0.263438
FANCC	5838	0.531693	4.0195	2.34258e-05	0.000797373	0	12.8721	18.9042	13.99	19.3059	12.8622	19.1978	2.20488	3.23812	2.39636	3.30693	2.20319	3.28842
TPTE2P5	4361	0.530922	1.93147	0.00270714	0.0234048	0	3.65988	4.12313	2.85336	4.70544	2.73954	4.57828	0.839229	0.945455	0.65429	1.07898	0.628191	1.04982
ZNF784	1996	0.530761	3.94041	0.000462456	0.00653434	0	12.1579	22.1326	12.5633	16.3819	12.8817	15.7696	6.09115	11.0885	6.29424	8.20737	6.45375	7.90062
SNAI1	1706	0.530656	0.214382	0.0487963	0.164248	0	1.12474	1.05023	0.660105	1.35548	0.952039	1.59245	0.659287	0.61561	0.386932	0.794536	0.558054	0.933438
PHYKPL	2970	0.530146	5.49955	1.27466e-05	0.000520411	0	37.3843	52.6671	37.3066	58.5179	36.2941	49.0562	12.5873	17.733	12.5611	19.703	12.2202	16.5172
C14orf79	1890	0.529683	2.38765	0.000597969	0.00786236	0	4.23118	6.20414	4.34392	5.65428	4.19675	6.59096	2.23872	3.28261	2.29837	2.99168	2.2205	3.48728
INAFM1	936	0.528727	3.2097	0.000827078	0.00986437	0	6.78417	12.3499	8.30455	11.2505	7.57746	9.02386	7.24804	13.1944	8.87238	12.0197	8.09557	9.64087
CAPN5	4390	0.528475	5.16526	1.80125e-05	0.000660617	0	27.4937	43.2345	30.663	45.0212	29.9407	38.7495	6.26281	9.8484	6.98473	10.2554	6.8202	8.82677
TMEM44-AS1	1434	0.528428	1.99202	0.00174626	0.0170209	0	3.32067	5.13446	3.25794	4.02771	3.1087	4.82157	2.31567	3.58052	2.27192	2.80872	2.16785	3.36232
SRD5A3-AS1	926	0.52827	-2.03119	0.243267	0.457679	0	0.196384	0.213936	0.191644	0.19364	0.116576	0.33176	0.212077	0.231032	0.206958	0.209114	0.125892	0.358272
KHK	2550	0.527697	3.10715	0.000149049	0.00297843	0	6.55208	10.5218	7.36763	9.93372	7.18887	9.95279	2.56944	4.12618	2.88927	3.89557	2.81916	3.90305
C1QTNF6	2936	0.527611	2.04726	0.00202825	0.0191057	0	3.33852	4.49265	3.44958	5.67364	3.28356	4.33499	1.1371	1.5302	1.17493	1.93244	1.11838	1.4765
IKZF2	9658	0.526945	9.68922	4.5291e-05	0.00127277	0	710.749	834.447	685.488	1009.87	633.009	1079.63	73.5917	86.3996	70.9761	104.563	65.5425	111.786
SPIB	3530	0.526509	0.0192758	0.0439403	0.153602	0	0.678417	0.952987	0.979511	1.29739	0.757746	1.21645	0.192186	0.269968	0.277482	0.367531	0.214659	0.344604
THAP7-AS1	2971	0.526345	3.02859	0.00153729	0.0155235	0	6.07004	11.1441	7.96385	8.75251	5.98425	8.86904	2.0431	3.75096	2.68053	2.94598	2.01422	2.9852
TTPAL	6236	0.525934	5.68606	4.18528e-06	0.000230525	0	42.5082	58.9296	42.7365	62.8554	41.2874	60.4023	6.81657	9.4499	6.85319	10.0794	6.62082	9.68607
MIR1183	89	0.525886	-2.1311	0.403162	0.61516	0	0.107118	0.213936	0.0851749	0.0580919	0.272011	0.420229	1.20358	2.40377	0.957021	0.652718	3.05631	4.72167
LCMT2	2847	0.525219	5.1561	1.6e-05	0.000615108	0	27.9222	44.0513	28.0012	42.1941	31.7087	39.8554	9.80759	15.4729	9.83535	14.8205	11.1376	13.9991
RASAL3	3290	0.524141	5.13705	5.50917e-05	0.00146143	0	26.4761	44.5181	30.8546	43.4721	29.2218	36.383	8.04745	13.5313	9.3783	13.2134	8.882	11.0587
HIST1H4L	364	0.522796	7.21487	0.000212407	0.00382106	0	99.9593	192.153	126.868	177.742	138.939	155.485	274.614	527.894	348.538	488.302	381.702	427.156
SPIRE1	5526	0.522679	2.71011	0.000843048	0.00996073	0	5.35592	6.55422	5.45119	8.67506	5.2265	7.80741	0.969222	1.18607	0.986463	1.56986	0.945802	1.41285
PGAP3	2700	0.52252	2.79339	0.00232548	0.0210417	0	5.2488	9.35483	6.87787	7.66813	4.8962	7.36506	1.944	3.46475	2.54736	2.84005	1.81341	2.7278
DFNB31	4162	0.521674	4.20159	0.000254358	0.00429177	0	13.979	22.3466	15.0334	24.3986	16.243	18.1583	3.35871	5.36919	3.61205	5.86223	3.90268	4.36288
CIRBP	3472	0.520246	7.54614	0.000170536	0.00326976	0	148.163	263.627	169.392	196.409	143.097	200.538	42.6736	75.9295	48.7879	56.5693	41.2147	57.7585
ZNF511	1110	0.520072	4.39369	7.65533e-05	0.00181464	0	16.282	27.3254	17.8867	25.0182	17.5836	21.8077	14.6685	24.6175	16.1142	22.539	15.8411	19.6465
LOC100506834	4388	0.519921	-0.184128	0.0463594	0.158942	0	0.64271	0.972436	0.638812	0.890742	0.796604	1.12798	0.14647	0.221613	0.145582	0.202995	0.181542	0.257061
CCDC183	1716	0.519891	1.38614	0.0126506	0.0678057	0	2.0174	2.39219	2.53395	3.46615	1.82636	3.27336	1.17564	1.39405	1.47666	2.0199	1.06431	1.90755
TMEM88	874	0.519615	0.518038	0.0255098	0.108222	0	1.39254	1.75038	0.91563	1.6653	1.10747	1.50398	1.59329	2.00273	1.04763	1.90538	1.26713	1.7208
SNORD29	65	0.519467	1.39407	0.0110183	0.0617438	0	2.48158	2.45054	1.87385	3.15633	2.02066	3.583	38.1781	37.7006	28.8284	48.5589	31.087	55.1231
ORAI1	1496	0.519348	6.22077	0.000120593	0.00254758	0	57.3262	96.5434	59.9631	93.6635	66.5456	73.2083	38.3197	64.5344	40.0823	62.6093	44.4824	48.936
MYO1D	6246	0.519261	4.95418	3.13675e-05	0.000996067	0	26.369	32.6155	25.4673	39.4638	24.5199	37.3782	4.22174	5.22182	4.07738	6.31825	3.92569	5.98435
KIAA0319	7172	0.517851	0.792772	0.0289733	0.117342	0	1.26757	1.75038	1.10727	1.8783	1.80693	2.38867	0.176738	0.244058	0.154388	0.261894	0.251943	0.333055
ABALON	1903	0.517808	-0.0550683	0.123458	0.301228	0	0.46418	1.30306	1.08598	1.27802	0.757746	0.663519	0.24392	0.684742	0.570667	0.671583	0.398185	0.34867
GCHFR	713	0.517586	1.17577	0.0263887	0.110356	0	1.71389	3.0729	1.55444	1.83958	2.21495	2.96372	2.40378	4.30981	2.18014	2.58005	3.10652	4.15669
LINC00933	2775	0.51672	-1.86754	0.266354	0.482592	0	0.321355	0.291731	0.127762	0.232368	0.116576	0.309642	0.115804	0.105128	0.0460405	0.0837361	0.0420095	0.111583
TNS2	5199	0.516511	2.69521	0.000639498	0.0082368	0	5.37377	8.40184	5.60025	7.06785	4.93506	7.27659	1.03362	1.61605	1.07718	1.35946	0.949233	1.39961
NDUFB2	495	0.516431	4.62045	0.000505753	0.0069769	0	17.7459	33.0239	20.7188	30.0141	22.2078	23.6434	35.8504	66.715	41.8561	60.6346	44.8642	47.7644
TMEM2	6523	0.515563	4.5175	0.000296278	0.00480485	0	18.9778	23.5524	16.3962	30.4789	21.0809	26.7177	2.90937	3.61067	2.51359	4.67253	3.23178	4.09592
ARSK	3345	0.515072	3.13764	0.00161425	0.0160733	0	7.71253	8.09067	6.87787	11.9282	7.05286	10.9481	2.30569	2.41873	2.05617	3.56598	2.10848	3.27296
MIR4664	142	0.513972	0.883293	0.0500273	0.167059	0	1.80316	2.9951	1.23504	1.80085	1.39892	1.54821	12.6983	21.0923	8.69744	12.682	9.85151	10.9029
RAB6B	5560	0.513967	2.64184	0.000841411	0.00994914	0	4.46327	7.42941	5.53637	7.61004	5.36251	6.85636	0.802746	1.33622	0.99575	1.36871	0.96448	1.23316
AP5S1	1960	0.513132	4.01237	0.000253615	0.0042874	0	13.0327	21.6659	13.6706	19.0929	13.1148	16.0129	6.64936	11.054	6.97478	9.74126	6.69124	8.16986
DNAJA1	1538	0.512663	6.35983	0.0972238	0.258498	0	63.1999	71.0462	56.6839	131.113	83.08	87.4076	41.0922	46.1939	36.8556	85.2493	54.0182	56.832
SOX5	4994	0.512166	3.0336	0.000320625	0.00508535	0	6.49852	8.71302	6.85658	10.4759	6.81971	9.57679	1.30126	1.7447	1.37296	2.0977	1.36558	1.91766
TMPRSS3	3489	0.511855	3.61979	0.000131766	0.00271916	0	10.0691	13.089	10.6682	15.1039	9.59811	15.0619	2.88596	3.7515	3.05765	4.329	2.75096	4.31696
JAKMIP2	9270	0.510988	1.70269	0.0115254	0.0636934	0	2.76723	3.26738	2.0442	4.5118	3.12813	3.56089	0.298514	0.352469	0.220518	0.48671	0.337447	0.38413
MAGIX	2809	0.510793	0.670027	0.0179397	0.0860185	0	1.37469	1.65314	1.38409	1.99449	1.08805	1.83574	0.489386	0.588516	0.492735	0.710035	0.387342	0.653519
C11orf65	1033	0.510616	-1.70198	0.204564	0.412643	0	0.178531	0.330628	0.298112	0.367915	0.194294	0.24329	0.172827	0.320066	0.288589	0.356162	0.188087	0.235518
LOXL2	3810	0.510437	2.90945	0.00113618	0.0123185	0	5.89151	7.79893	6.40941	10.4565	6.2174	8.09493	1.54633	2.04696	1.68226	2.7445	1.63186	2.12465
LOC646626	888	0.51016	-1.34598	0.194506	0.40035	0	0.178531	0.350077	0.276818	0.522827	0.427446	0.375994	0.201048	0.394231	0.311732	0.588769	0.481358	0.423417
ITFG2	2826	0.510143	5.15221	4.65365e-05	0.00129367	0	28.3864	43.4679	33.0053	41.4776	26.5794	40.2756	10.0447	15.3814	11.6791	14.6771	9.4053	14.2518
EFCAB6	4929	0.509435	-0.806628	0.0895653	0.245059	0	0.428474	0.680705	0.383287	0.580919	0.505164	0.619284	0.0869291	0.138102	0.0777616	0.117857	0.102488	0.125641
LOC642852	7165	0.509372	5.64004	5.84854e-05	0.00150548	0	40.5265	52.6477	39.8193	66.9025	43.0361	56.0674	5.65617	7.3479	5.55747	9.3374	6.00643	7.82517
RNU11	135	0.509314	3.34949	0.0412569	0.14713	0	5.74869	13.4196	11.4347	12.9932	8.06319	9.3335	42.5829	99.4045	84.7017	96.2461	59.7273	69.137
PLCL1	6608	0.509066	4.26505	6.2803e-05	0.00158019	0	16.4784	20.6351	14.6501	23.4691	16.379	23.5549	2.4937	3.12274	2.21702	3.55162	2.47866	3.56461
HIST3H2BB	452	0.508695	7.25523	0.000284362	0.00466151	0	113.278	216.989	132.788	164.652	132.236	156.48	250.614	480.065	293.778	364.274	292.558	346.194
CTSO	5866	0.508398	1.6107	0.00381194	0.0298769	0	2.24949	3.65636	2.61913	3.21442	2.62297	3.78206	0.383479	0.623314	0.446493	0.547975	0.447147	0.644742
NEK9	5543	0.508262	7.05364	2.55129e-06	0.000163747	0	110.635	157.029	109.365	160.043	108.979	150.84	19.9595	28.3292	19.7302	28.873	19.6607	27.2127
LYRM9	1481	0.508203	2.79112	0.000558544	0.00749359	0	5.71298	9.00475	5.49378	7.51322	5.84824	7.74106	3.85752	6.08019	3.70951	5.07307	3.94885	5.22691
SPATA24	678	0.507952	1.10087	0.006878	0.0444648	0	1.76745	2.58668	1.6822	2.57541	1.76807	2.25596	2.60686	3.81516	2.48113	3.79854	2.60778	3.32738
SNORD34	66	0.507574	-0.532294	0.103182	0.268862	0	0.357061	0.7585	0.532343	0.793923	0.738316	0.751988	5.41002	11.4924	8.0658	12.0291	11.1866	11.3938
CRLF2	3902	0.50739	-1.99149	0.310807	0.529204	0	0.107118	0.291731	0.234231	0.116184	0.194294	0.353877	0.0274522	0.0747644	0.0600284	0.0297754	0.0497934	0.0906911
ZBTB11-AS1	2784	0.50651	2.05624	0.00668602	0.0437465	0	3.767	4.95942	3.79028	5.42191	2.66182	4.11382	1.35309	1.7814	1.36145	1.94753	0.956115	1.47766
SP2	3112	0.506411	5.64093	0.000764717	0.00931123	0	38.277	71.7074	46.2074	55.2648	39.1696	48.5475	12.2998	23.0422	14.8481	17.7586	12.5866	15.6001
PLCG1-AS1	1794	0.506326	1.37803	0.0114183	0.0632602	0	2.57084	2.60613	1.87385	3.38869	1.88465	3.03007	1.43302	1.45269	1.04451	1.8889	1.05053	1.689
FAM78B	1481	0.505917	1.55862	0.02307	0.101434	0	2.42802	3.7536	1.7035	3.75661	3.05041	2.69831	1.63944	2.53451	1.15023	2.53654	2.0597	1.82195
C6orf52	881	0.504573	-1.86576	0.266266	0.482547	0	0.124971	0.311179	0.149056	0.213004	0.31087	0.309642	0.141852	0.353212	0.16919	0.241775	0.35286	0.351467
TRAF3	7776	0.503894	7.08947	3.81497e-06	0.00021402	0	110.528	164.575	113.751	163.413	113.584	151.083	14.214	21.1645	14.6285	21.015	14.607	19.4294
HGSNAT	5214	0.503277	5.26784	0.000128307	0.002655	0	33.1174	40.4728	33.8357	51.1983	28.6	43.748	6.35164	7.76233	6.4894	9.8194	5.48524	8.39049
PTPRS	7347	0.503135	7.1818	1.2674e-05	0.000519566	0	121.526	177.431	126.038	178.052	112.749	155.131	16.5409	24.1501	17.155	24.2346	15.3462	21.1148
AMIGO2	3951	0.503105	-0.271457	0.0682555	0.204685	0	0.678417	1.10858	0.574931	0.948834	0.699458	0.707754	0.171708	0.280581	0.145515	0.24015	0.177033	0.179133
SCAMP5	3540	0.503094	2.96502	0.00225647	0.0207078	0	5.40948	10.6579	6.62235	8.61697	7.28602	8.0507	1.5281	3.0107	1.87072	2.43417	2.0582	2.27421
SLC38A10	5145	0.502949	6.4762	2.56559e-05	0.00085597	0	71.9122	104.323	75.8482	115.254	73.171	93.4456	13.9771	20.2766	14.7421	22.4012	14.2218	18.1624
SNORD50B	71	0.502923	0.454992	0.0395445	0.143126	0	1.35683	1.36141	1.08598	1.80085	0.854893	1.52609	19.1103	19.1748	15.2955	25.3641	12.0407	21.4943
LDLRAD4	11054	0.502881	8.21204	1.08607e-05	0.000466027	0	237.91	334.81	241.726	380.076	256.39	328.066	21.5225	30.2885	21.8678	34.3836	23.1943	29.6785
FAM173B	2966	0.502872	3.81776	0.000852439	0.010056	0	12.3365	13.4391	10.4765	18.8799	12.0851	17.1851	4.1593	4.53104	3.5322	6.36543	4.07454	5.79405
PDGFA	2807	0.502638	3.68338	0.000347135	0.00538183	0	10.7297	16.4925	9.53959	15.2782	11.5216	13.2704	3.82248	5.87549	3.3985	5.44288	4.1046	4.7276
NRSN2	2386	0.502631	0.0489512	0.0669839	0.201711	0	0.8748	1.40031	1.0221	1.12311	0.582881	0.973161	0.366639	0.586885	0.428373	0.470708	0.244292	0.407863
DNAH10	23512	0.502203	2.74412	0.00395218	0.0306522	0	5.57016	6.34028	5.55766	9.87562	5.4208	7.21024	0.236907	0.269661	0.236376	0.420025	0.230554	0.306662
RTN2	2288	0.501965	2.02214	0.00262658	0.0229837	0	3.28496	4.4732	2.91724	4.72481	3.78873	4.97639	1.43574	1.95507	1.27502	2.06504	1.65591	2.175
LOC644285	5214	0.501797	1.67508	0.0181126	0.0865737	0	2.99932	2.66447	2.61913	4.47308	2.21495	3.98111	0.575243	0.511023	0.502326	0.857897	0.424808	0.763543
S1PR1	3050	0.501625	3.93649	7.47012e-05	0.00179603	0	12.8542	18.6902	12.9679	18.512	12.1239	16.4995	4.21449	6.12794	4.25176	6.06949	3.97506	5.40967
ATP6V0E2-AS1	3069	0.500891	3.07344	0.000416029	0.00608262	0	6.81987	9.7827	6.85658	10.8438	7.15001	8.8248	2.22218	3.18759	2.23414	3.53334	2.32975	2.87547
LOC100507291	915	0.500836	1.60093	0.00427281	0.0322312	0	2.24949	3.67581	2.40619	3.3306	2.79783	3.53877	2.45846	4.01728	2.62972	3.64	3.05774	3.86751
MBD3	2499	0.500627	7.18088	4.74846e-05	0.00130299	0	114.331	189.878	121.758	173.056	124.367	146.969	45.7507	75.9815	48.7225	69.25	49.7669	58.8113
OR3A1	948	0.500546	-0.402281	0.1391	0.326255	0	0.517739	0.564013	0.425874	1.14247	0.835463	0.81834	0.546138	0.59495	0.449235	1.20514	0.88129	0.863228
TCTEX1D2	679	0.500524	2.89734	0.000398402	0.00592347	0	6.40925	9.0631	6.00483	8.98488	6.00368	8.00646	9.43925	13.3477	8.84364	13.2325	8.84194	11.7916
CYB5D2	2002	0.500259	3.48374	0.00014627	0.0029384	0	8.62303	13.0501	9.39053	13.671	9.71469	12.4742	4.30721	6.51853	4.69058	6.82865	4.85249	6.23085
RUSC1-AS1	1306	0.500018	2.23474	0.00852292	0.051846	0	4.0705	4.22037	3.98193	6.95166	3.55558	5.2418	3.11677	3.23152	3.04895	5.32287	2.72249	4.01363
LOC105377348	1175	0.499987	0.384163	0.0473114	0.161076	0	1.1426	1.73094	0.787868	1.1812	1.20462	1.54821	0.972422	1.47314	0.670526	1.00528	1.02521	1.31763
SAXO2	3130	0.49974	-1.27599	0.177996	0.379492	0	0.410621	0.525115	0.298112	0.329187	0.213723	0.464463	0.131189	0.167768	0.0952435	0.105172	0.0682821	0.148391
GPR153	4082	0.499434	6.04256	0.000123255	0.00258937	0	52.5773	86.3328	56.8755	80.4379	54.344	64.6931	12.8803	21.1496	13.9333	19.7055	13.3131	15.8484
PEX11G	1139	0.499123	0.968179	0.0247855	0.106443	0	1.28542	2.68392	1.55444	1.91703	1.94294	2.14538	1.12855	2.35639	1.36474	1.68308	1.70583	1.88356
CCDC102A	2429	0.499041	3.09593	0.00248921	0.022075	0	7.23049	11.2608	6.83529	11.0375	7.09172	7.56412	2.97674	4.63598	2.81403	4.54404	2.91961	3.11409
LOC100379224	3361	0.498972	-0.32287	0.149646	0.340138	0	0.678417	0.525115	0.383287	1.16184	0.816034	0.995279	0.20185	0.156238	0.11404	0.345682	0.242795	0.296126
MIR345	98	0.498137	-1.9573	0.253115	0.468238	0	0.23209	0.272282	0.106469	0.271096	0.194294	0.221173	2.36826	2.77839	1.08641	2.76628	1.98259	2.25687
LOC100132057	1485	0.49784	-0.100732	0.0877287	0.241781	0	0.731976	0.739051	0.553637	1.20057	0.93261	1.21645	0.492913	0.497678	0.372819	0.808462	0.62802	0.819159
LINC01021	1106	0.497475	-1.05122	0.1229	0.300322	0	0.392768	0.466769	0.298112	0.503463	0.408017	0.597167	0.355124	0.422034	0.269541	0.455211	0.368912	0.539934
STYXL1	1416	0.497266	3.40942	0.00349625	0.0280441	0	8.05173	11.2997	7.09081	13.7097	11.1913	12.1866	5.68625	7.98002	5.00763	9.68198	7.90347	8.60638
ATP5S	2187	0.496944	4.28853	6.65797e-05	0.00165597	0	17.6924	22.4049	15.2463	22.133	15.5824	23.9973	8.0898	10.2446	6.97133	10.1203	7.12499	10.9727
CYB561D2	2332	0.496878	3.99082	0.000296072	0.00480485	0	13.0684	21.413	13.9687	17.6599	12.4542	16.6101	5.60396	9.18226	5.99	7.57287	5.34058	7.12268
CCER2	1057	0.496236	1.44934	0.0234824	0.102445	0	1.85672	3.46187	3.08759	3.05951	1.80693	2.9416	1.75659	3.27519	2.92109	2.89452	1.70949	2.78297
MYCBPAP	3190	0.496208	2.69762	0.00063687	0.00823514	0	5.60586	7.15713	5.28084	8.15223	5.16821	7.34294	1.75732	2.24361	1.65544	2.55556	1.62013	2.30186
SPIRE2	3244	0.495785	0.771498	0.0388686	0.141713	0	1.30327	1.59479	1.80997	2.24622	1.06862	2.03479	0.401749	0.491614	0.557943	0.692423	0.329413	0.627248
TRMT10A	3870	0.495602	3.39416	0.000231166	0.00404327	0	9.0158	11.5525	8.02773	12.1218	9.03466	13.1377	2.32966	2.98515	2.07435	3.13226	2.33454	3.39475
TTC3P1	2542	0.495519	0.166475	0.0625926	0.193172	0	1.21401	1.10858	0.74528	1.39421	0.718887	1.30492	0.47758	0.436104	0.293187	0.548468	0.282804	0.513344
HIST1H3J	478	0.495212	8.23621	0.000209529	0.00378727	0	205.025	378.044	261.295	333.293	284.524	346.91	428.922	790.887	546.643	697.265	595.238	725.753
TEX21P	1045	0.494771	-1.24269	0.260092	0.475551	0	0.357061	0.739051	0.404581	0.348551	0.194294	0.24329	0.341686	0.707226	0.387159	0.333542	0.185927	0.232814
TMEM91	1423	0.494425	3.77939	0.000234814	0.00408929	0	10.8368	16.1813	12.2865	17.5244	11.0165	14.332	7.61547	11.3713	8.63421	12.3151	7.74171	10.0717
MAP3K8	3013	0.494405	1.39783	0.0117947	0.064646	0	1.83887	3.09235	2.00161	2.73032	2.6424	3.3176	0.610311	1.02633	0.664325	0.90618	0.876998	1.10109
SUSD4	3218	0.494262	4.14639	5.97465e-05	0.0015261	0	14.6574	19.8571	14.6075	22.4041	14.7663	19.7507	4.55481	6.17065	4.53931	6.96212	4.58867	6.13759
TOP1P2	1519	0.493912	-0.907509	0.170299	0.368572	0	0.23209	0.44732	0.553637	0.677739	0.466305	0.619284	0.152791	0.294484	0.364475	0.446174	0.306982	0.407692
SLC16A6	3955	0.493503	0.0286848	0.0580483	0.182957	0	0.856947	1.45865	0.766574	1.06502	0.816034	0.906809	0.216674	0.368813	0.193824	0.269284	0.20633	0.229282
TRADD	1482	0.493438	3.60041	0.00111926	0.0122018	0	9.44427	15.1117	9.81641	15.8978	10.8805	11.3683	6.37265	10.1968	6.62376	10.7273	7.34173	7.67091
DUSP14	3016	0.493271	4.43914	4.33877e-05	0.00123765	0	16.6926	25.4584	17.908	25.4636	19.3905	25.0589	5.53469	8.4411	5.93767	8.44284	6.42922	8.30865
LIPE-AS1	2924	0.493033	-0.876493	0.140522	0.328116	0	0.482033	0.466769	0.361993	0.813287	0.408017	0.486581	0.164854	0.159634	0.123801	0.278142	0.139541	0.166409
SMCR2	564	0.492529	-1.95569	0.231184	0.444497	0	0.178531	0.252833	0.212937	0.251732	0.155435	0.265408	0.316544	0.448286	0.377548	0.446333	0.275594	0.470581
CDK10	1798	0.49246	5.80004	4.65474e-05	0.00129367	0	45.9538	68.2844	50.7642	66.554	42.1229	60.4245	25.5583	37.978	28.2337	37.0155	23.4276	33.6065
FAM104B	2277	0.491657	3.02615	0.00140508	0.0144682	0	6.21287	8.55743	6.06871	9.97244	7.94661	9.93067	2.72853	3.75821	2.66522	4.37964	3.48995	4.36129
QRICH2	5457	0.491251	3.62202	0.0356881	0.134102	0	8.19456	11.4164	10.6682	19.79	11.7936	11.7885	1.50166	2.09206	1.95495	3.62653	2.16119	2.16026
CYP20A1	10943	0.490973	5.69551	3.79687e-05	0.00112767	0	43.99	53.834	41.5653	64.5788	43.6189	63.167	4.01992	4.9195	3.79835	5.90138	3.98601	5.77237
HIST1H3D	921	0.489746	9.41918	4.646e-05	0.00129367	0	501.314	853.818	594.393	763.231	612.841	782.024	544.315	927.055	645.378	828.698	665.409	849.103
HAGLROS	673	0.489693	0.415397	0.0503427	0.167591	0	0.910506	1.92542	1.14986	1.1812	1.18519	1.43762	1.35291	2.86096	1.70856	1.75513	1.76106	2.13614
LINC01315	1239	0.489445	-0.857898	0.154429	0.346962	0	0.374914	0.739051	0.298112	0.484099	0.602311	0.57505	0.302594	0.59649	0.240607	0.390718	0.486126	0.464124
HIST1H4B	357	0.488612	8.20833	0.000307215	0.00492944	0	211.291	401.149	257.313	323.959	269.835	310.881	591.852	1123.67	720.766	907.449	755.841	870.815
LOC100126784	3739	0.488538	-1.91936	0.270181	0.487021	0	0.214237	0.15559	0.149056	0.309823	0.194294	0.33176	0.0572979	0.0416127	0.0398652	0.0828627	0.0519641	0.0887295
THOC6	1420	0.48844	5.12133	4.73659e-05	0.00130299	0	28.3507	45.1794	29.6196	38.7086	28.8721	37.9091	19.9653	31.8165	20.8589	27.2596	20.3324	26.6965
PKIG	1758	0.488435	4.64639	0.000111514	0.00241299	0	19.3884	32.6155	21.4002	26.5286	21.6832	28.465	11.0287	18.5526	12.173	15.0902	12.334	16.1917
MBP	6900	0.488434	6.48791	8.90315e-06	0.000402555	0	73.6082	109.282	76.2528	98.9305	74.1814	106.097	10.6679	15.838	11.0511	14.3378	10.7509	15.3763
NFKBIA	1567	0.488391	5.69951	3.04241e-05	0.000970178	0	42.4367	65.5227	45.526	60.5705	41.7343	55.8019	27.0815	41.8141	29.053	38.6538	26.6332	35.6107
ZMAT1	4166	0.487722	3.64384	0.00617383	0.0413052	0	11.2474	10.1911	9.73123	16.3432	10.1421	17.1851	2.69982	2.44626	2.33587	3.92299	2.4345	4.12509
SRR	2493	0.487706	4.4041	0.000120092	0.00254055	0	17.2461	24.8166	16.5452	22.3847	19.0019	26.8725	6.9178	9.9545	6.63667	8.97904	7.62211	10.7792
GALNS	2363	0.486934	4.10326	6.16686e-05	0.00155621	0	14.3539	21.063	14.2029	20.2741	14.3	18.7112	6.07443	8.91365	6.01054	8.5798	6.05164	7.91842
AGRN	7394	0.486047	6.65705	4.42151e-05	0.00124949	0	83.0882	122.527	89.0929	126.485	79.9907	104.106	11.2372	16.5711	12.0494	17.1065	10.8183	14.0798
HLCS	7368	0.48589	5.36975	1.98671e-05	0.00071141	0	34.4386	45.3155	34.5597	51.4694	34.2734	47.8397	4.67407	6.15031	4.69051	6.98554	4.65166	6.4929
NTN3	1986	0.485571	2.14161	0.00658148	0.0433245	0	3.94553	6.30138	3.34311	4.55053	3.63329	4.44558	1.98667	3.1729	1.68334	2.29131	1.82945	2.23846
ID2-AS1	1573	0.485244	-0.724408	0.0950891	0.254962	0	0.482033	0.641808	0.489756	0.600283	0.446876	0.751988	0.306442	0.408015	0.311351	0.381617	0.284091	0.47806
SETD9	1922	0.484538	1.31838	0.0119145	0.0651042	0	2.0531	2.56723	1.98032	2.57541	2.1178	3.49453	1.06821	1.33571	1.03034	1.33996	1.10187	1.81818
KIAA0754	6979	0.483681	6.39339	2.21187e-05	0.000763171	0	77.1074	97.2436	66.2661	97.7106	66.8176	99.0192	11.0485	13.9337	9.49507	14.0007	9.5741	14.1882
ZFPM1	3241	0.483475	5.43664	0.000391162	0.00585019	0	33.3852	55.3121	37.7538	54.9743	37.1684	41.0276	10.3009	17.0664	11.6488	16.9621	11.4682	12.6589
BMF	4777	0.483399	5.48058	3.31185e-05	0.00103008	0	36.9201	57.257	37.6686	48.8166	37.0518	49.9851	7.72873	11.986	7.88541	10.2191	7.75629	10.4637
MC1R	3099	0.483263	1.56953	0.00827428	0.0507205	0	2.74937	2.9562	2.29972	3.87279	2.27324	3.42818	0.887181	0.953922	0.742085	1.24969	0.733539	1.10622
FBN1	11695	0.48323	3.83636	0.000178493	0.00337533	0	11.5331	15.6757	11.9884	18.4539	12.1434	15.7033	0.986155	1.34037	1.02508	1.57793	1.03834	1.34273
IFT80	4792	0.483014	5.43671	0.000657646	0.00837793	0	38.5983	41.9703	32.1109	49.9009	37.557	59.584	8.05474	8.75842	6.70095	10.4134	7.83743	12.4341
WASF1	3220	0.482954	5.52474	3.80829e-05	0.00112885	0	36.6881	50.4305	37.8389	58.4211	40.6074	52.042	11.3938	15.6617	11.7512	18.1432	12.611	16.1621
FAM122A	3646	0.482428	5.21927	2.25036e-05	0.000774687	0	31.2607	40.4339	31.0675	45.5441	30.8344	44.1904	8.57398	11.0899	8.52099	12.4915	8.45705	12.1202
C22orf24	1598	0.482088	-0.797947	0.14316	0.331446	0	0.321355	0.641808	0.383287	0.658375	0.641169	0.57505	0.201098	0.401632	0.239854	0.411999	0.401232	0.359856
MYO7A	7746	0.481549	-1.58207	0.195485	0.401113	0	0.23209	0.330628	0.276818	0.29046	0.233153	0.420229	0.0299625	0.0426837	0.0357369	0.037498	0.0300997	0.0542511
HHAT	3962	0.480833	2.21466	0.00316968	0.0260788	0	4.03479	6.14579	4.00322	5.054	3.49729	4.88792	1.01837	1.55118	1.0104	1.27562	0.882708	1.2337
LOC101928766	5271	0.48076	-0.772921	0.145364	0.333964	0	0.303502	0.680705	0.553637	0.735831	0.524593	0.486581	0.0575796	0.129142	0.105034	0.1396	0.0995244	0.0923128
CPS1	6165	0.480672	3.59082	0.000611931	0.00800418	0	9.94416	12.2138	9.24148	15.5686	10.8999	14.2214	1.613	1.98115	1.49902	2.52533	1.76803	2.3068
EFCAB5	6339	0.480431	1.25942	0.0174136	0.0842428	0	2.17807	2.66447	1.7035	3.29187	2.00123	2.25596	0.343599	0.42033	0.268733	0.519305	0.315701	0.355887
PIP5KL1	1708	0.48015	3.18937	0.000898647	0.0104066	0	7.69467	10.9107	8.62396	10.2823	6.46998	10.5721	4.50508	6.38801	5.04916	6.02006	3.78805	6.18974
SERPINE1	3190	0.479996	-1.17473	0.16412	0.360018	0	0.267796	0.583461	0.3407	0.387279	0.408017	0.442346	0.0839486	0.182903	0.106802	0.121404	0.127905	0.138666
KIAA0895L	3400	0.479817	6.26685	0.000193564	0.00355383	0	62.3072	88.9001	70.1415	102.242	60.4448	77.7644	18.3256	26.1471	20.6299	30.0711	17.7779	22.8719
ZNF252P	5430	0.479772	5.26031	0.000101855	0.00223917	0	31.4393	40.1421	29.4918	46.2605	35.0117	47.4416	5.78992	7.39266	5.43127	8.51943	6.44783	8.73694
ADAT3	1626	0.479704	3.06149	0.00538734	0.0376912	0	6.4271	9.08255	6.75011	12.1993	7.65517	7.71894	3.95271	5.58582	4.15136	7.50264	4.70798	4.74719
PPM1J	1714	0.479526	-1.20799	0.180264	0.382197	0	0.357061	0.330628	0.234231	0.522827	0.388588	0.530815	0.208321	0.192899	0.136657	0.305033	0.226714	0.309694
TNXB	93194	0.479234	3.4684	0.000225743	0.00397596	0	9.35501	12.0388	9.02854	13.884	9.26781	12.629	0.100382	0.12918	0.096879	0.148979	0.0994464	0.135513
LYRM7	6247	0.479176	5.96195	0.000349177	0.00539692	0	56.5228	59.6298	50.4448	78.6758	49.1563	79.4011	9.04799	9.54534	8.07505	12.5942	7.86879	12.7103
SGK3	4608	0.478675	-0.59769	0.130446	0.312588	0	0.535592	0.875192	0.660105	0.735831	0.369158	0.552933	0.116231	0.189929	0.143252	0.159685	0.0801124	0.119994
SKIDA1	6596	0.477995	0.834983	0.0193675	0.0905429	0	1.30327	2.29495	1.51185	1.83958	1.57378	1.96844	0.197586	0.34793	0.229208	0.278893	0.238596	0.298429
RAET1K	1883	0.477964	2.00873	0.00230024	0.0209154	0	3.4635	4.86218	3.10888	4.5118	3.41957	4.55616	1.83935	2.58214	1.65103	2.39607	1.81602	2.41963
EFHC1	7029	0.4778	3.33926	0.000631151	0.00818497	0	9.26574	10.6384	8.30455	11.812	7.71346	12.8059	1.31822	1.51351	1.18147	1.68047	1.09738	1.82187
SSBP2	4465	0.477217	7.72065	3.25243e-05	0.00101786	0	177.477	215.978	173.863	260.736	177.662	259.723	39.7486	48.3713	38.9391	58.3955	39.79	58.1687
DZIP3	5542	0.475791	5.03293	0.00100954	0.0114201	0	29.3326	31.8764	25.1692	35.9008	27.5509	46.4684	5.29278	5.75179	4.54153	6.47795	4.97128	8.38478
RING1	10428	0.475668	6.2211	5.46108e-05	0.00145632	0	59.0401	92.0702	63.1572	90.9913	64.9718	77.1451	5.66169	8.82913	6.0565	8.72567	6.23052	7.39788
EPHX1	2373	0.475291	4.31463	0.000144929	0.00291533	0	15.5143	25.0499	17.6099	23.2368	16.7676	21.0114	6.53785	10.5562	7.42095	9.79215	7.06597	8.85438
GLUD1P7	486	0.474904	-0.60574	0.124776	0.303221	0	0.571298	0.564013	0.489756	0.968198	0.485734	0.619284	1.17551	1.16052	1.00773	1.99218	0.999453	1.27425
TUFT1	3250	0.474769	2.65979	0.0013725	0.0141909	0	5.46304	7.77949	5.02532	6.4482	5.28479	7.71894	1.68094	2.39369	1.54625	1.98406	1.62609	2.37506
ZNF610	2382	0.474071	1.31855	0.0339728	0.130143	0	2.0531	2.02267	1.7035	3.17569	2.40924	3.40606	0.861924	0.849146	0.715154	1.3332	1.01144	1.42992
CNTF	1893	0.473638	-0.982418	0.170999	0.369716	0	0.267796	0.525115	0.553637	0.639011	0.369158	0.464463	0.141466	0.277398	0.292465	0.337565	0.195012	0.245358
LINC01124	2129	0.4734	0.0193771	0.0692856	0.206507	0	1.05333	1.18637	0.638812	1.04565	0.738316	1.17222	0.494754	0.557244	0.300052	0.491148	0.34679	0.550595
SLC35A5	3259	0.472857	4.98478	0.0001248	0.00261098	0	27.6365	34.8715	24.9137	34.0225	26.9097	41.4699	8.48007	10.7001	7.64457	10.4395	8.25704	12.7247
GLIPR2	2853	0.472839	5.74581	1.62837e-05	0.000621283	0	45.4361	65.3282	43.8864	61.6549	45.4259	60.0264	15.9257	22.8981	15.3825	21.6105	15.9221	21.0397
SH3GLB2	2305	0.47151	6.85065	9.28016e-05	0.00209584	0	91.9969	150.669	103.7	132.43	94.4073	119.057	39.9119	65.3662	44.9893	57.4534	40.9576	51.6518
SARS2	2136	0.471377	4.78387	0.000464876	0.00654413	0	21.7093	36.8359	24.0193	32.2991	23.4707	26.7177	10.1635	17.2453	11.245	15.1213	10.9881	12.5083
POR	2499	0.470911	5.20134	7.5783e-05	0.00180552	0	29.1005	44.3042	29.0446	40.7612	34.2928	43.0624	11.6449	17.7288	11.6225	16.311	13.7226	17.2318
ARSB	6678	0.470619	3.11629	0.00158313	0.015849	0	6.6949	9.31593	7.87868	11.6958	7.16944	9.06809	1.00253	1.39502	1.1798	1.7514	1.07359	1.35791
SLC4A4	8010	0.470311	5.07055	0.000311422	0.00496538	0	29.8682	32.6544	26.7662	42.8912	27.784	41.4699	3.72886	4.0767	3.3416	5.3547	3.46867	5.17727
GTF2H2C_2	9015	0.47021	-1.17384	0.226143	0.439305	0	0.214237	0.661256	0.468462	0.348551	0.349729	0.398111	0.0237645	0.0733507	0.0519647	0.0386635	0.0387941	0.044161
PGBD2	2709	0.470121	3.19111	0.00214626	0.0199199	0	8.39094	9.47152	7.49539	9.66262	6.99458	12.629	3.09743	3.49632	2.76685	3.56686	2.58198	4.66186
ASPSCR1	2125	0.470041	4.43903	6.16475e-05	0.00155621	0	17.1747	25.614	18.3765	25.9284	18.9436	23.9088	8.08219	12.0536	8.64776	12.2016	8.91465	11.2512
FLJ32255	2759	0.470027	2.40946	0.00265192	0.0231386	0	4.14191	5.62068	4.57815	7.00976	4.5659	5.7505	1.50124	2.03722	1.65935	2.54069	1.65491	2.08427
NINJ1	1281	0.469963	4.77315	0.000253368	0.0042874	0	20.8881	36.0968	24.0832	30.1691	23.7621	28.8631	16.3061	28.1786	18.8003	23.5512	18.5497	22.5317
N6AMT2	872	0.469794	2.39575	0.00240806	0.0215191	0	3.90982	5.77627	4.91885	6.02219	4.35218	6.43613	4.48374	6.62416	5.64088	6.90619	4.99103	7.38089
CCDC92	4412	0.469602	5.40895	0.000242439	0.00417298	0	31.2072	50.8	37.6047	53.4252	38.0427	43.6374	7.07325	11.5141	8.52328	12.1091	8.62256	9.89062
TSPAN5	3397	0.469559	5.30799	7.22704e-05	0.00176277	0	32.4569	46.0935	30.7907	43.1816	36.3329	48.6581	9.55457	13.5689	9.06409	12.7117	10.6956	14.3238
SUMO1P3	1206	0.469418	-0.249515	0.0848039	0.236517	0	0.571298	0.816846	0.681399	0.852015	0.777175	1.1501	0.473713	0.677318	0.565008	0.70648	0.644424	0.953648
RAB9B	3799	0.469067	3.55008	0.000391248	0.00585019	0	10.1762	12.0582	9.73123	14.0776	9.48154	14.5753	2.67867	3.17405	2.56152	3.70561	2.4958	3.83662
MIR3607	79	0.468761	-1.32334	0.218856	0.431137	0	0.446327	0.427872	0.234231	0.348551	0.213723	0.486581	5.64971	5.4161	2.96495	4.41204	2.70536	6.15925
MIR3682	84	0.468305	-1.50127	0.269152	0.485726	0	0.428474	0.388974	0.17035	0.29046	0.174864	0.420229	5.10088	4.63065	2.02797	3.45785	2.08172	5.00272
XPC	3720	0.468224	6.25393	1.26548e-05	0.000519566	0	63.3962	86.3912	66.0318	90.7202	62.6209	88.5577	17.042	23.2234	17.7505	24.3871	16.8336	23.8058
RAD51-AS1	1135	0.468103	2.34576	0.00187776	0.0179664	0	4.48112	6.08745	3.98193	5.42191	4.2356	6.08226	3.94812	5.36339	3.50831	4.77701	3.73181	5.35882
NUMBL	3650	0.467743	4.19107	0.000247802	0.00422686	0	14.8716	23.9025	14.9482	20.0998	16.0875	19.4632	4.07441	6.54862	4.0954	5.50679	4.40754	5.33239
MAPRE3	2387	0.467187	3.08976	0.00772163	0.0483104	0	6.51637	10.9302	6.19647	10.8825	8.62664	7.65259	2.72994	4.57904	2.59593	4.55909	3.61401	3.20594
TECPR2	9068	0.466877	5.36622	2.02622e-05	0.000717124	0	35.117	48.6801	33.7506	48.7391	34.934	46.0482	3.87263	5.36834	3.72194	5.37485	3.85245	5.0781
POLR2L	876	0.466532	5.17022	0.0158543	0.0790472	0	24.8693	48.3301	32.409	46.5703	33.3991	30.2122	28.3896	55.1713	36.9966	53.1625	38.1268	34.4889
ANKRD61	1423	0.466466	-1.24061	0.202035	0.409504	0	0.410621	0.388974	0.3407	0.387279	0.213723	0.57505	0.28856	0.273348	0.239423	0.272157	0.150192	0.404111
LINC01058	535	0.46605	0.518464	0.0825275	0.232437	0	1.35683	1.98377	1.38409	1.21993	0.777175	1.6588	2.53614	3.70798	2.58709	2.28024	1.45266	3.10056
MAPK8IP2	3381	0.465915	0.934493	0.0190673	0.0897131	0	1.80316	2.21715	1.40539	2.30431	1.49606	1.99056	0.533321	0.655769	0.415672	0.681547	0.442491	0.588748
UNC5B	6890	0.465725	1.53789	0.036018	0.135007	0	2.60655	3.30628	1.72479	4.06643	2.85612	2.56561	0.378309	0.479867	0.250333	0.590193	0.414531	0.372367
PFKFB1	1885	0.465691	0.881934	0.025433	0.10806	0	1.53536	2.46999	1.66091	1.78148	1.36006	2.03479	0.814517	1.31034	0.88112	0.945085	0.721515	1.07947
HTATSF1P2	4616	0.465593	2.99869	0.00381277	0.0298769	0	6.80202	7.95452	5.51507	10.2823	7.71346	9.4662	1.47357	1.72325	1.19477	2.22753	1.67103	2.05074
SSTR3	4300	0.46557	2.43195	0.0272422	0.112466	0	4.90959	8.42129	4.47168	4.26007	4.11903	5.97167	1.14177	1.95844	1.03993	0.990715	0.957913	1.38876
WHAMMP2	10492	0.465339	-1.52537	0.233439	0.446452	0	0.249943	0.350077	0.319406	0.251732	0.213723	0.486581	0.0238222	0.0333661	0.0304428	0.0239927	0.0203701	0.0463763
LOC115110	9238	0.465059	0.0437802	0.0535913	0.174232	0	0.910506	1.30306	0.809161	1.06502	0.777175	1.08375	0.098561	0.141055	0.0875905	0.115287	0.0841281	0.117314
PAPD5	8112	0.464937	5.84187	6.14452e-05	0.00155621	0	46.4537	62.2164	45.6963	65.9537	52.3427	71.3062	5.72654	7.66968	5.63318	8.13038	6.45251	8.79021
CALM1	4256	0.464601	7.25739	9.35363e-06	0.000414267	0	124.793	170.546	127.102	180.201	133.752	181.428	29.3217	40.0718	29.8642	42.3405	31.4266	42.6288
LINGO4	2666	0.464593	-0.0976234	0.0794507	0.226352	0	0.964066	1.10858	0.638812	0.92947	0.641169	1.08375	0.361615	0.41582	0.239614	0.348639	0.240499	0.406507
SSR4P1	2256	0.464456	3.21334	0.000707355	0.00879664	0	7.17693	11.3192	7.58057	9.93372	8.54893	10.9038	3.18126	5.01735	3.36018	4.40324	3.78942	4.83326
VPREB3	585	0.463416	-1.97666	0.363537	0.580855	0	0.303502	0.369526	0.106469	0.174276	0.116576	0.199056	0.518807	0.631668	0.181998	0.297907	0.199276	0.340266
LOC100507577	2549	0.463242	2.2301	0.00675399	0.0439868	0	4.01694	4.29817	3.70511	5.69301	4.02188	6.23708	1.57589	1.68622	1.45355	2.23343	1.57783	2.44687
HIST1H1E	785	0.463225	9.96114	0.000672116	0.0085034	0	721.085	1352.87	881.858	1093.39	911.393	1019.94	918.58	1723.4	1123.39	1392.85	1161.01	1299.29
SPAG8	2332	0.463203	1.03709	0.0259886	0.109408	0	1.85672	2.62558	1.3628	1.95576	1.84579	2.4329	0.796192	1.12589	0.58439	0.838662	0.791505	1.04327
SPOP	3141	0.462594	5.32841	0.000534496	0.0072545	0	33.6352	38.4696	32.6433	54.2578	35.0117	46.8666	10.7084	12.2476	10.3926	17.2741	11.1467	14.9209
RALGPS1	7634	0.462205	6.52262	4.63963e-05	0.00129367	0	78.4464	106.171	83.7695	110.2	69.732	103.133	10.2759	13.9076	10.9732	14.4355	9.1344	13.5097
ALG14	1094	0.462165	3.04874	0.00052477	0.00716744	0	6.60564	9.16034	7.09081	9.50771	7.11115	9.99702	6.03806	8.37326	6.48154	8.69077	6.50014	9.13804
PDLIM7	2277	0.461839	5.11837	3.65264e-05	0.00109993	0	28.2793	39.8699	29.5131	42.4845	29.8047	38.2629	12.4195	17.5098	12.9614	18.6581	13.0894	16.8041
CENPN	5307	0.460923	6.26652	2.82927e-05	0.000925239	0	63.2534	85.691	62.8591	86.9055	68.1777	94.8611	11.9189	16.1468	11.8446	16.3756	12.8467	17.8747
TARSL2	3294	0.460659	4.18107	0.000162579	0.00315716	0	16.2463	19.3904	14.9269	21.281	14.5332	22.2721	4.93209	5.88657	4.53154	6.46053	4.41201	6.76142
SLC23A3	2418	0.460549	1.63122	0.00916589	0.0543389	0	2.60655	3.17014	2.25713	3.93089	2.85612	3.53877	1.07798	1.31106	0.933472	1.62568	1.18119	1.46351
HIST1H2AI	469	0.460252	9.12639	0.000270395	0.0044958	0	399.32	700.64	483.602	598.501	528.479	642.574	851.428	1493.9	1031.13	1276.12	1126.82	1370.09
N6AMT1	1543	0.459941	2.88184	0.00360166	0.0286229	0	6.9627	7.91563	4.91885	9.10106	6.60599	8.47093	4.51244	5.13002	3.18785	5.89829	4.28126	5.48991
MIR30E	92	0.459654	-1.9754	0.288706	0.5069	0	0.214237	0.194487	0.127762	0.309823	0.194294	0.24329	2.32866	2.11399	1.38872	3.36765	2.11189	2.64446
ATF7	7351	0.459537	6.32319	6.72233e-05	0.00166923	0	64.0568	88.5694	65.1801	101.177	72.9573	88.2701	8.71403	12.0486	8.86683	13.7637	9.92481	12.0079
PKIB	2408	0.459456	-0.51409	0.0995791	0.262481	0	0.571298	0.894641	0.553637	0.755195	0.544023	0.641402	0.23725	0.371529	0.229916	0.313619	0.225923	0.266363
NEB	26307	0.459445	-1.28433	0.27045	0.487112	0	0.178531	0.272282	0.489756	0.542191	0.291441	0.486581	0.00678643	0.0103502	0.0186169	0.0206101	0.0110784	0.0184962
ZBTB20	28312	0.459395	5.21696	0.000394716	0.00588836	0	32.6176	37.536	33.8783	45.0212	27.3954	46.5569	1.15208	1.3258	1.19661	1.59018	0.967626	1.64442
RASSF4	2495	0.459365	3.90882	0.000115438	0.00247318	0	12.1401	17.6205	12.7124	17.079	13.0177	17.3621	4.86577	7.06234	5.09513	6.8453	5.21751	6.95875
C19orf60	880	0.459331	4.24861	0.000261765	0.00438547	0	15.6393	23.5913	17.4396	22.3654	14.8829	19.9277	17.7719	26.8083	19.8177	25.4152	16.9124	22.6451
TCP10L	2697	0.459211	1.13572	0.0447612	0.15529	0	1.71389	1.88653	1.66091	3.34997	2.07894	2.25596	0.635482	0.69949	0.615836	1.24211	0.770835	0.836472
PTPN12	3297	0.458951	2.27386	0.00586098	0.03981	0	4.40971	4.60935	3.7264	5.77046	3.98302	6.32555	1.33749	1.39804	1.13024	1.75022	1.20807	1.91858
ANKRD44	6449	0.458912	4.47488	0.00023591	0.00409981	0	19.5313	22.366	18.1423	27.4194	18.419	27.3591	3.02857	3.46814	2.81319	4.25173	2.85611	4.24238
RNY1	113	0.458748	4.44896	0.402598	0.61456	0	13.247	32.3432	22.4649	31.9118	19.4877	11.2798	117.23	286.223	198.804	282.405	172.457	99.8214
AP3B2	3787	0.458721	2.51859	0.00440592	0.0329237	0	4.39185	6.30138	4.89756	7.74559	5.10993	5.70626	1.15972	1.66395	1.29325	2.04531	1.34933	1.5068
ATP13A4	7599	0.458426	1.8231	0.0202849	0.0933908	0	2.80293	3.01455	2.7256	4.97654	3.32242	4.18017	0.368855	0.396704	0.358678	0.654894	0.437218	0.550095
PPP1R13L	3178	0.458363	4.60736	0.000758279	0.00924771	0	18.8171	33.0045	21.6131	27.4775	21.1197	23.9973	5.92106	10.3853	6.80086	8.64615	6.6456	7.55106
SNORD54	63	0.458334	-0.181482	0.142094	0.33024	0	0.589151	1.32251	0.851749	1.00693	0.699458	0.57505	9.35161	20.9923	13.5198	15.983	11.1025	9.12777
ADAM8	3301	0.458239	3.04434	0.000750086	0.00915516	0	6.83773	9.49097	6.51588	10.0886	7.40259	8.93539	2.07141	2.87518	1.97391	3.05623	2.24253	2.70687
TMEFF1	2486	0.457682	1.26163	0.0174738	0.084426	0	1.71389	2.9951	2.12937	2.88523	2.13723	2.3002	0.689419	1.20479	0.856546	1.16059	0.859707	0.925261
GATS	6008	0.457519	6.71398	2.70732e-05	0.000895367	0	91.4256	119.687	93.0323	123.465	80.8845	121.203	15.2173	19.9213	15.4847	20.55	13.4628	20.1736
KAT6B	8499	0.457045	6.39892	1.29066e-05	0.000524117	0	71.573	96.1739	72.1005	99.1241	69.6349	97.5152	8.42134	11.3159	8.48342	11.663	8.1933	11.4737
ZCCHC24	4931	0.456908	4.2849	0.000258817	0.00436074	0	16.3534	23.9997	15.2037	20.2547	17.6419	23.3116	3.31645	4.86711	3.08329	4.10763	3.57775	4.72757
ZNF321P	2334	0.456541	-1.06778	0.247688	0.462523	0	0.23209	0.311179	0.404581	0.484099	0.485734	0.751988	0.0994387	0.133325	0.173342	0.207412	0.208112	0.322189
LOC100507424	877	0.456506	2.4727	0.00260632	0.0228328	0	4.19547	6.32083	5.23826	6.11901	4.54647	6.72366	4.78389	7.20733	5.97293	6.97721	5.18412	7.66666
LINC01372	491	0.456414	0.19051	0.0769753	0.221662	0	0.8748	1.12803	1.17115	1.56848	0.757746	1.12798	1.78167	2.2974	2.38524	3.19446	1.54327	2.29732
TMCC1-AS1	3497	0.45611	1.45482	0.0240097	0.103993	0	2.0531	2.91731	2.0442	3.8147	2.73954	2.63196	0.587104	0.834231	0.584557	1.09085	0.783398	0.752633
IQCE	7205	0.455928	4.80871	0.000154358	0.00305229	0	22.352	31.468	23.0398	35.591	25.4331	30.0574	3.1023	4.36753	3.19775	4.93976	3.52992	4.17174
EBF2	4872	0.455699	-0.953989	0.203061	0.41087	0	0.339208	0.330628	0.511049	0.716467	0.369158	0.619284	0.069624	0.0678629	0.104895	0.147058	0.0757714	0.127111
TAPT1-AS1	2547	0.455643	3.04864	0.00393287	0.0305583	0	6.89128	7.91563	6.38812	11.4247	7.55803	9.24503	2.70565	3.10782	2.50809	4.48557	2.96742	3.62977
SSBP3	3254	0.455429	7.28027	2.00731e-05	0.000717092	0	128.417	175.836	131.191	193.93	133.655	169.441	39.4644	54.0368	40.3167	59.5975	41.074	52.0715
SP4	5800	0.454831	6.13825	4.93793e-05	0.00134041	0	59.8613	75.4999	56.258	81.9096	62.0574	86.8546	10.3209	13.0172	9.69966	14.1223	10.6996	14.9749
HIPK3	8113	0.454697	7.31561	1.61632e-05	0.000618242	0	134.648	171.382	132.702	188.218	135.772	192.907	16.5966	21.1244	16.3568	23.1995	16.7352	23.7775
C8orf44-SGK3	4563	0.454523	-1.97343	0.304974	0.523213	0	0.124971	0.175038	0.212937	0.271096	0.213723	0.309642	0.027388	0.0383604	0.0466661	0.0594117	0.0468383	0.0678593
JMJD7	1422	0.454406	2.36164	0.0026989	0.0233601	0	4.53468	6.32083	4.23745	6.09965	4.13846	5.26392	3.18894	4.44503	2.97992	4.28949	2.91031	3.70177
EIF4G3	6970	0.454333	6.58431	9.99574e-05	0.00220387	0	80.1424	100.258	82.2577	125.924	80.4376	106.517	11.4982	14.3842	11.8017	18.0666	11.5405	15.2822
SUOX	2462	0.453559	1.62435	0.00941164	0.0553624	0	2.33875	3.22849	2.49137	3.44679	2.89498	3.91476	0.94994	1.31133	1.01193	1.39999	1.17586	1.59007
PDE11A	9790	0.45331	-0.364175	0.135238	0.32001	0	0.731976	0.680705	0.425874	0.793923	0.699458	1.10587	0.0747677	0.0695306	0.043501	0.0810953	0.0714461	0.112959
SCN4B	4819	0.453237	-2.1118	0.292625	0.511115	0	0.142825	0.213936	0.17035	0.213004	0.174864	0.24329	0.0296378	0.0443942	0.0353496	0.0442008	0.0362864	0.0504856
CTNNA3	12419	0.452804	-1.7828	0.323254	0.541214	0	0.303502	0.272282	0.0851749	0.232368	0.233153	0.375994	0.0244385	0.0219246	0.00685843	0.0187107	0.0187739	0.0302757
ZFAND2B	1323	0.452635	5.0435	9.55244e-05	0.00212457	0	25.9584	41.2702	28.5336	36.7915	28.9886	36.1397	19.6208	31.1944	21.5673	27.8092	21.9113	27.3165
SRGAP1	8475	0.452177	-0.955494	0.147884	0.337857	0	0.374914	0.583461	0.489756	0.580919	0.349729	0.486581	0.0442377	0.068845	0.0577883	0.068545	0.0412659	0.0574136
LRRC17	2270	0.451725	-1.90305	0.381101	0.595414	0	0.357061	0.272282	0.0851749	0.19364	0.116576	0.33176	0.157296	0.119948	0.037522	0.0853038	0.0513552	0.14615
TEX12	1144	0.451341	-1.47332	0.207033	0.415796	0	0.321355	0.369526	0.234231	0.329187	0.252582	0.420229	0.280905	0.323012	0.204747	0.287751	0.220788	0.367333
PLAGL1	4132	0.451001	4.18425	0.000212092	0.00381993	0	15.1573	19.5654	15.1611	23.198	15.6795	20.1046	3.66826	4.73509	3.6692	5.61424	3.79465	4.86559
DISP2	5032	0.450454	1.17457	0.0329487	0.127673	0	2.0531	2.66447	1.46927	2.96269	2.07894	2.03479	0.408009	0.529506	0.291985	0.588769	0.413145	0.40437
FLJ42351	514	0.45032	0.220253	0.0568616	0.180916	0	0.8748	1.06968	0.979511	1.4523	1.01033	1.39339	1.70195	2.08109	1.90566	2.82548	1.96562	2.71088
SNTB2	9771	0.449915	5.77087	0.00111752	0.0122018	0	46.168	50.9362	42.9281	74.1834	49.2729	63.919	4.72501	5.213	4.39342	7.5922	5.04277	6.5417
DISP1	4924	0.449638	1.9371	0.020727	0.0947869	0	3.03502	3.44242	2.78948	5.38318	3.78873	4.31287	0.616373	0.699111	0.566506	1.09325	0.769441	0.875888
ZMYND11	5200	0.449601	6.03038	5.06757e-05	0.00136824	0	53.7556	69.7042	53.7667	78.5209	58.1715	78.0741	10.3376	13.4047	10.3397	15.1002	11.1868	15.0142
ST7	3159	0.449387	2.29453	0.00228579	0.0208741	0	4.24903	5.64013	4.28004	5.61555	3.82759	5.61779	1.34506	1.78542	1.35487	1.77764	1.21165	1.77835
RNVU1-17	164	0.449352	-2.01365	0.461777	0.664059	0	0.160678	0.44732	0.276818	0.213004	0.0971469	0.0442346	0.979742	2.72756	1.68792	1.2988	0.592359	0.269723
NPFF	592	0.449029	0.471851	0.0502978	0.167556	0	1.37469	1.75038	1.0221	1.39421	1.01033	1.52609	2.32211	2.95673	1.72652	2.35508	1.70663	2.57786
ANKRD24	4026	0.449003	2.51575	0.00165408	0.0163221	0	4.83818	6.39863	4.94014	6.91294	4.64362	6.36978	1.20173	1.58933	1.22706	1.71707	1.15341	1.58216
ENO1-AS1	446	0.448688	0.166703	0.0906739	0.246914	0	0.660564	1.49755	1.0008	1.02629	1.10747	1.23857	1.48108	3.35774	2.24396	2.3011	2.48313	2.77706
KLHL22	2616	0.448238	5.03926	0.000137874	0.00280465	0	24.9407	37.5166	29.9177	39.9285	28.5418	36.2724	9.53392	14.3412	11.4364	15.2632	10.9105	13.8656
CCNE1	1947	0.447131	3.90474	0.000691408	0.00869108	0	12.0687	18.5152	13.4576	14.8328	12.4348	18.4016	6.1986	9.50959	6.91198	7.61828	6.38665	9.45126
HERC6	3889	0.446541	2.48279	0.00220206	0.0202887	0	4.3383	6.7487	5.00402	6.21583	4.77963	6.2592	1.11553	1.73533	1.28671	1.59831	1.22901	1.60946
F8A1	5106	0.446236	2.48172	0.00572618	0.0392819	0	3.89197	7.04043	5.02532	5.86728	5.20707	6.30343	0.762234	1.37886	0.984199	1.1491	1.01979	1.23451
INHBC	3301	0.446087	-0.109631	0.12082	0.296559	0	0.803388	0.855743	0.979511	1.10375	0.485734	1.12798	0.243377	0.259238	0.296732	0.334367	0.147148	0.341709
JAK3	5434	0.445753	4.97814	0.000460978	0.00651955	0	25.7441	36.6414	27.8096	41.3614	26.4434	30.8758	4.7376	6.74298	5.1177	7.6116	4.86628	5.68196
ZDHHC14	2787	0.445523	2.62604	0.00454499	0.0337135	0	5.26666	6.96264	5.4299	8.26841	4.8962	5.97167	1.88972	2.49826	1.9483	2.96678	1.7568	2.14269
SRRM2-AS1	1645	0.445463	2.12035	0.00470763	0.034598	0	3.26711	5.2317	3.96063	4.5699	3.74987	5.13121	1.98609	3.18037	2.40768	2.77805	2.27956	3.11928
C15orf39	4427	0.445351	6.74119	0.000281843	0.00463202	0	84.6771	137.93	93.7776	127.299	93.2804	104.681	19.1274	31.1566	21.1831	28.7551	21.0708	23.6461
SMIM2-AS1	1256	0.445337	-1.38273	0.247796	0.462523	0	0.196384	0.369526	0.234231	0.406643	0.446876	0.420229	0.156356	0.294208	0.18649	0.323761	0.355793	0.334577
CELF5	5258	0.445275	4.77508	0.000787731	0.00949225	0	22.7627	30.4372	26.2339	35.7072	20.5174	28.4207	4.32915	5.78875	4.98932	6.79101	3.90213	5.40524
TIAM1	7198	0.445174	6.28667	5.32625e-05	0.00142538	0	65.5386	84.4463	68.8426	97.4395	63.9032	88.049	9.10511	11.7319	9.56413	13.537	8.87791	12.2324
PBX1	6903	0.444469	0.232583	0.0635012	0.194876	0	1.01762	1.40031	1.0008	1.04565	0.874322	1.50398	0.147418	0.202855	0.144981	0.151478	0.126658	0.217873
DOK4	2750	0.444458	3.56794	0.00111672	0.0122018	0	9.72992	15.559	9.47571	12.9739	10.8416	12.3415	3.53815	5.65781	3.44571	4.71777	3.9424	4.4878
LOC283440	571	0.444367	-0.526658	0.166671	0.363823	0	0.660564	0.486218	0.574931	0.948834	0.427446	0.840457	1.15685	0.85152	1.00688	1.66171	0.748592	1.4719
SNORA60	136	0.444307	-0.580141	0.179788	0.381627	0	0.46418	0.622359	0.809161	0.793923	0.349729	0.774106	3.41309	4.57617	5.94972	5.83767	2.57153	5.69195
OR10T2	945	0.443696	-0.735858	0.185725	0.388668	0	0.64271	0.525115	0.298112	0.793923	0.466305	0.619284	0.680117	0.555678	0.315463	0.84013	0.493444	0.655327
AP1G2	2954	0.443282	6.88884	3.2671e-05	0.00102016	0	102.905	131.104	104.211	144.397	94.1353	134.097	34.8358	44.3818	35.2781	48.8819	31.8671	45.3951
POLN	3256	0.443231	1.89434	0.0159437	0.0793881	0	2.96361	3.24794	3.00241	4.89908	3.40014	4.6004	0.910199	0.997523	0.922118	1.50463	1.04427	1.4129
APBA1	11692	0.443134	5.38141	8.21797e-05	0.00191799	0	34.2957	49.2441	35.1133	50.9466	36.5078	43.7701	2.93327	4.21178	3.00319	4.35739	3.12246	3.7436
GBAP1	4074	0.443099	2.75715	0.00424819	0.0321415	0	5.19524	6.67091	5.62154	8.90742	6.29512	7.6747	1.27522	1.63743	1.37986	2.18641	1.54519	1.88383
RUNX3	4767	0.443057	6.2004	0.000442108	0.0063574	0	60.7183	99.0329	66.4364	80.8252	59.7842	74.2035	12.7372	20.7747	13.9367	16.9551	12.5413	15.5661
PARVG	3759	0.442856	6.40363	3.99397e-05	0.00117015	0	70.5018	103.078	73.4633	99.1822	71.2669	90.2607	18.7555	27.4217	19.5433	26.3853	18.959	24.0119
EVI5	7436	0.442772	0.429306	0.0490234	0.164683	0	1.03548	1.30306	1.21374	1.74276	1.08805	1.48186	0.139252	0.175237	0.163225	0.234368	0.146321	0.199282
SNORA13	133	0.442511	-0.799173	0.15337	0.345162	0	0.410621	0.622359	0.447168	0.755195	0.505164	0.464463	3.08737	4.67939	3.36217	5.67816	3.79822	3.49221
LOC100129461	4470	0.442303	1.43159	0.0223184	0.0992962	0	1.89243	2.74227	2.3849	3.65979	2.50639	2.78678	0.423361	0.613483	0.533534	0.818745	0.560714	0.623441
DOCK9	8047	0.442134	5.26007	0.00040769	0.00600225	0	33.046	37.9833	31.1953	50.598	33.1465	43.748	4.10663	4.72019	3.87664	6.28781	4.11911	5.43656
KIAA1549L	11620	0.441448	1.9561	0.0127335	0.0681052	0	3.15999	3.7925	2.98112	5.34445	3.63329	4.13594	0.271944	0.326377	0.256551	0.459936	0.312676	0.355932
BAZ2B	10723	0.44086	3.79155	0.00068599	0.00863732	0	11.8009	13.9447	12.1161	16.1883	11.2496	17.6275	1.10052	1.30045	1.12992	1.50968	1.04911	1.6439
MIR181B1	110	0.440837	1.54813	0.0271949	0.112444	0	2.9279	3.67581	2.44878	2.69159	1.96237	3.62724	26.6173	33.4164	22.2616	24.469	17.8397	32.9749
ZNF474	1964	0.440513	-1.41761	0.348257	0.565704	0	0.214237	0.15559	0.319406	0.348551	0.330299	0.685636	0.109082	0.0792208	0.16263	0.17747	0.168177	0.349102
LOC100288798	906	0.440209	2.19174	0.00524822	0.0370951	0	4.12406	4.74549	3.61993	5.01527	3.78873	5.92744	4.55194	5.23784	3.99551	5.53562	4.18182	6.54242
C4orf32	2726	0.440072	3.68972	0.000554889	0.00746439	0	11.0153	13.3807	11.0301	14.6973	10.725	16.411	4.04084	4.90855	4.04628	5.39151	3.93434	6.02019
LOC439994	1164	0.440053	2.2833	0.00723383	0.0460963	0	4.24903	6.18469	3.64123	5.82855	4.39104	4.64463	3.65037	5.31331	3.1282	5.00735	3.77237	3.99023
KIAA0922	5019	0.439523	8.32198	1.60567e-05	0.000615725	0	279.026	354.628	270.239	374.828	265.561	375.596	55.5939	70.6571	53.8431	74.6819	52.9111	74.8348
ATP1B2	3453	0.439479	0.504578	0.039725	0.143607	0	1.19616	1.45865	1.23504	1.74276	1.08805	1.57033	0.346411	0.422431	0.35767	0.504708	0.315101	0.454772
ASAP3	4152	0.439271	3.82707	0.000383317	0.00576558	0	12.8899	17.3094	11.1579	15.5493	11.9879	16.035	3.10451	4.16892	2.68736	3.74501	2.88727	3.862
TRPV5	5734	0.439134	-0.457858	0.144219	0.332799	0	0.482033	0.60291	0.74528	0.987562	0.544023	0.796223	0.0840657	0.105147	0.129976	0.172229	0.0948766	0.13886
SNORD74	72	0.438648	0.575676	0.0457079	0.157538	0	1.28542	1.5559	1.21374	1.4523	1.20462	2.03479	17.8531	21.6097	16.8575	20.1708	16.7309	28.261
GSN	3483	0.438167	4.53292	0.000106246	0.00232482	0	18.7457	27.2282	20.7827	27.0127	19.3905	25.5455	5.38206	7.81746	5.96689	7.75559	5.56719	7.33433
HIST2H2BC	582	0.437184	1.92243	0.00984276	0.0570573	0	3.32067	4.4732	3.61993	4.00834	2.6424	4.48981	5.70562	7.68592	6.21982	6.88718	4.5402	7.71445
VIPR2	4648	0.437122	4.96	0.000373605	0.00567033	0	25.3692	38.4307	28.7891	37.5467	25.1222	31.2739	5.45809	8.26821	6.19387	8.07804	5.40494	6.72846
LYRM2	5598	0.437102	5.48331	0.000137946	0.00280465	0	39.0804	45.6072	37.4131	54.1223	37.4404	54.5634	6.98113	8.14706	6.68329	9.66815	6.68818	9.74694
KIAA1522	5606	0.43686	3.76815	0.00129097	0.0135324	0	10.7118	18.0095	11.3708	14.2325	12.5708	14.6417	1.91078	3.21254	2.02834	2.5388	2.24238	2.61178
KNDC1	6773	0.436785	-0.562736	0.298575	0.517214	0	0.285649	1.12803	0.574931	0.716467	0.777175	0.33176	0.0421747	0.166547	0.0848857	0.105783	0.114746	0.0489827
MALAT1	8751	0.435727	13.7307	0.000194765	0.00357155	0	11961.3	14312.9	11433.1	15702.8	11275.1	16878.2	1366.85	1635.57	1306.49	1794.4	1288.44	1928.71
GTF2IP20	2947	0.435672	3.28189	0.00251967	0.0222539	0	8.28382	10.0939	8.68784	13.1869	7.75232	10.1297	2.81093	3.42514	2.94803	4.47467	2.63058	3.4373
SMPD1	2472	0.435645	3.94677	0.000640197	0.00823879	0	12.9256	19.7015	14.0326	17.292	12.2988	16.0572	5.22881	7.96988	5.6766	6.99515	4.97524	6.49561
HIST1H2AH	481	0.435238	7.55168	0.000541804	0.00732742	0	132.863	236.38	169.541	206.904	176.166	203.7	276.221	491.434	352.475	430.154	366.25	423.493
ZNF414	1558	0.434926	4.62587	0.000487288	0.0067653	0	19.6384	31.6236	22.7204	28.2908	20.5757	25.081	12.6049	20.2976	14.5831	18.1584	13.2065	16.0982
LOC100129148	460	0.434868	-0.846616	0.315302	0.534751	0	0.214237	0.525115	0.787868	0.852015	0.349729	0.398111	0.465732	1.14155	1.71276	1.85221	0.76028	0.86546
KRCC1	1827	0.434786	4.53254	0.00108166	0.0119242	0	18.5136	23.0856	18.3552	26.4318	22.0912	30.2343	10.1334	12.6358	10.0466	14.4673	12.0915	16.5486
CPB2-AS1	3508	0.434491	1.149	0.0334069	0.128857	0	1.94598	1.88653	1.80997	2.88523	1.80693	2.76466	0.554728	0.537778	0.515954	0.822472	0.515089	0.788102
GPR146	2218	0.434218	3.40639	0.0139859	0.0726491	0	10.1941	16.0063	8.36843	10.0693	8.37406	10.3288	4.59608	7.21654	3.77296	4.53979	3.7755	4.6568
KANSL1L	4743	0.434031	4.66328	0.000298132	0.00482974	0	22.0307	25.4	20.9956	31.176	21.5472	30.6988	4.64488	5.35526	4.42665	6.57305	4.54294	6.47245
PRKAR2B	3661	0.433377	3.60391	0.000391005	0.00585019	0	9.92631	13.5947	10.3275	13.5354	10.7056	14.6859	2.71136	3.71337	2.82094	3.69719	2.92422	4.01144
SMIM14	1658	0.433047	3.9726	0.000197636	0.00361109	0	13.247	17.1343	13.5215	18.4926	13.2314	18.3795	7.98973	10.3343	8.15532	11.1536	7.98034	11.0853
GJC2	2381	0.432983	0.552682	0.0376356	0.138939	0	1.24971	1.69204	1.14986	1.72339	1.24348	1.50398	0.52487	0.710642	0.482932	0.723811	0.522251	0.631657
RGMB-AS1	2030	0.432365	-0.381952	0.104874	0.271776	0	0.624857	0.719602	0.596224	0.832651	0.641169	0.973161	0.307812	0.354484	0.293707	0.410173	0.315847	0.47939
LINC00337	1640	0.432347	2.77931	0.00173086	0.0169472	0	5.39163	7.95452	6.30294	7.61004	5.77052	7.98435	3.28758	4.85032	3.84326	4.64027	3.51861	4.8685
SESN3	9828	0.432269	6.814	0.00105898	0.0117685	0	96.2459	105.101	88.4754	133.089	102.529	149.513	9.79303	10.694	9.00238	13.5418	10.4323	15.213
ARHGEF3	4785	0.431856	4.89649	0.000169278	0.00324975	0	26.4225	37.3026	25.0414	31.5052	24.5199	33.7068	5.52195	7.79574	5.23332	6.58415	5.12432	7.04426
LINC00673	2257	0.431253	-0.257594	0.11776	0.29149	0	0.69627	1.14747	0.702693	0.677739	0.641169	0.928927	0.308493	0.508407	0.311339	0.300283	0.28408	0.411576
KANK2	5232	0.431132	5.61943	0.000127733	0.00264675	0	40.6336	57.3932	42.5449	61.074	42.356	50.7371	7.76636	10.9696	8.13166	11.6732	8.09557	9.69746
DOK3	3538	0.431116	1.69144	0.0325361	0.126788	0	2.9279	3.20904	1.91644	3.95025	3.28356	3.84841	0.827559	0.90702	0.541672	1.11652	0.928085	1.08774
BCO2	3002	0.430716	0.203579	0.126623	0.306284	0	1.16045	0.91409	1.04339	1.39421	0.641169	1.54821	0.386559	0.304494	0.347566	0.464426	0.213581	0.515727
STX17	6908	0.430462	6.47124	6.74716e-05	0.00167266	0	76.5897	94.5013	73.1865	100.712	76.882	110.299	11.0871	13.68	10.5945	14.579	11.1294	15.9668
LSMEM1	1806	0.430299	0.0538408	0.0863786	0.239117	0	0.731976	1.10858	0.958218	1.37484	0.874322	0.951044	0.405302	0.61383	0.530574	0.761263	0.484121	0.526602
FALEC	566	0.429616	-0.54663	0.169377	0.367277	0	0.410621	0.739051	0.447168	0.697103	0.796604	0.796223	0.725478	1.30574	0.79005	1.23163	1.40743	1.40675
LINC00663	2371	0.429615	1.35108	0.0229518	0.10115	0	2.0174	2.82006	2.27843	3.42742	2.13723	2.38867	0.850863	1.1894	0.960957	1.44556	0.901405	1.00745
ADCK5	1988	0.42945	4.03986	0.000835042	0.00990456	0	13.1934	20.285	13.2873	19.4802	15.4852	16.7207	6.63653	10.2037	6.68374	9.79887	7.78934	8.4108
C16orf45	4685	0.429066	4.76262	7.36287e-05	0.00178441	0	22.8162	31.5847	23.5934	31.602	22.9267	30.1459	4.87006	6.74167	5.03595	6.74536	4.89363	6.43455
GLCE	5043	0.428759	4.23721	0.00182666	0.0175936	0	15.6928	18.6124	14.0539	23.198	18.3802	23.0241	3.11181	3.69074	2.7868	4.60005	3.64469	4.56556
ARHGAP39	5270	0.428504	2.34415	0.0206965	0.0947296	0	4.48112	5.36785	3.407	7.08721	4.97392	4.86581	0.850307	1.01857	0.646489	1.34482	0.943818	0.923303
ZSWIM6	5503	0.4284	4.84116	0.000191188	0.00352013	0	24.8515	31.7209	23.4018	30.7113	24.9667	36.1618	4.51599	5.76428	4.25255	5.58082	4.53693	6.57129
HSD17B4	2938	0.427921	6.25715	7.28296e-05	0.00177355	0	65.4851	81.6457	62.348	88.3578	67.7502	93.1581	22.289	27.7896	21.2212	30.0741	23.06	31.708
RRNAD1	2269	0.427242	4.31997	0.000230653	0.00403897	0	16.4427	24.3692	17.1414	23.1399	17.4476	21.0778	7.24666	10.7401	7.55463	10.1983	7.68955	9.28946
ST7-OT3	1024	0.427164	-1.51486	0.269695	0.486415	0	0.285649	0.44732	0.17035	0.329187	0.330299	0.287525	0.278954	0.436836	0.166357	0.321472	0.322558	0.280786
LOC100505530	1201	0.427006	0.868719	0.0388429	0.14167	0	1.51751	2.39219	1.32021	1.9364	1.72921	1.81362	1.26354	1.99183	1.09926	1.61232	1.43981	1.51009
LINC00667	3977	0.426982	-0.396706	0.115256	0.287465	0	0.607004	0.797397	0.553637	0.968198	0.680028	0.707754	0.152629	0.200502	0.13921	0.243449	0.17099	0.177962
CERS6	6851	0.426952	7.34069	4.7139e-05	0.00130057	0	138.486	169.359	138.601	195.731	137.677	192.531	20.214	24.7204	20.2307	28.5697	20.0958	28.1026
SNORD48	316	0.426783	-0.928662	0.163011	0.358468	0	0.392768	0.525115	0.425874	0.658375	0.427446	0.486581	1.24294	1.66176	1.3477	2.08346	1.35268	1.53981
MIR4437	60	0.426611	-2.07152	0.374653	0.590183	0	0.124971	0.252833	0.255525	0.29046	0.136006	0.132704	2.08286	4.21389	4.25874	4.84099	2.26676	2.21173
LINC00029	1749	0.426506	-0.251244	0.149364	0.339702	0	0.607004	0.797397	0.489756	0.871379	0.952039	1.10587	0.347058	0.455916	0.28002	0.498215	0.544334	0.632284
ALDH16A1	3106	0.42624	4.85516	0.00043441	0.00626668	0	22.3163	36.5636	26.2552	32.7057	25.4719	30.1459	7.18491	11.7719	8.45305	10.5299	8.20087	9.70569
NCOA1	6951	0.425605	6.36555	7.50585e-05	0.00179744	0	71.6622	87.0719	67.1817	98.7562	72.1996	97.67	10.3096	12.5265	9.66504	14.2075	10.3869	14.0512
HIST2H2BE	2223	0.425413	8.66672	0.00120058	0.0128768	0	291.737	528.422	397.447	445.584	351.516	423.458	131.236	237.707	178.789	200.443	158.127	190.489
HMOX2	5634	0.425056	5.08162	0.000512738	0.00703482	0	26.4761	37.3415	27.7883	42.8912	32.3888	36.0733	4.69934	6.62789	4.93225	7.61292	5.74881	6.40279
TMEM120B	7510	0.425029	5.34449	0.000508511	0.00699507	0	36.2774	45.3155	36.3271	52.5151	31.3784	41.7353	4.83055	6.03402	4.83716	6.99269	4.17822	5.5573
REEP6	1373	0.424925	4.21777	0.000948727	0.0108866	0	15.6214	24.5443	16.1406	20.8356	15.8155	18.4458	11.3776	17.8764	11.7557	15.1753	11.5189	13.4347
C22orf23	2010	0.424799	-1.2502	0.272148	0.488865	0	0.196384	0.311179	0.468462	0.522827	0.330299	0.486581	0.0977034	0.154816	0.233066	0.260113	0.164328	0.24208
OSBPL5	3887	0.42451	6.77332	0.000168489	0.00323871	0	90.0687	140.789	98.5686	119.979	91.5318	115.187	23.1718	36.2205	25.3585	30.8668	23.5482	29.6339
HPX	1623	0.424401	-0.354777	0.144838	0.333655	0	0.678417	0.816846	0.596224	1.12311	0.62174	0.597167	0.418002	0.503294	0.367359	0.691996	0.383081	0.36794
MXD4	3773	0.424336	6.10656	0.000408707	0.00600454	0	57.2905	84.4852	58.1745	85.4726	60.9888	66.7721	15.1843	22.3921	15.4186	22.6537	16.1645	17.6974
ITFG3	3867	0.424154	5.98768	0.000113402	0.00243873	0	51.7739	76.7057	57.0246	74.7255	53.7222	66.5731	13.3886	19.836	14.7465	19.3239	13.8925	17.2157
SNORA2B	137	0.42385	0.6631	0.0499501	0.166982	0	1.4461	2.02267	1.42668	1.58785	1.08805	1.70303	10.5555	14.764	10.4137	11.5901	7.94193	12.4309
HEXIM1	4785	0.42347	6.84346	7.36e-05	0.00178441	0	92.2825	131.454	97.291	139.401	104.666	123.724	19.2858	27.4721	20.3325	29.133	21.8738	25.8567
ITGA9-AS1	874	0.423345	0.308665	0.0879949	0.242206	0	0.964066	1.78928	1.06469	1.25866	1.04919	1.06163	1.10305	2.04723	1.21818	1.44011	1.20044	1.21468
CSPG5	2590	0.422901	1.49464	0.0126349	0.0677695	0	2.12452	3.18959	2.51266	3.25315	2.50639	3.11854	0.820276	1.2315	0.970139	1.25604	0.967718	1.20407
B3GNT9	2705	0.422882	2.21122	0.0511014	0.16941	0	3.82056	4.35651	4.10969	7.53258	3.84702	3.84841	1.41241	1.61054	1.51929	2.78469	1.42219	1.4227
DET1	2343	0.422871	3.35361	0.00133783	0.0139146	0	8.37309	12.2527	9.36924	10.4372	8.39349	12.3415	3.57366	5.22949	3.99882	4.45462	3.58237	5.26737
LINC01547	2185	0.422176	3.55001	0.00112117	0.0122087	0	9.3193	14.8588	10.2636	12.9932	10.3753	12.253	4.26513	6.80037	4.69729	5.94655	4.74841	5.60777
CHTF8	3004	0.421726	6.91232	0.000252889	0.00428469	0	95.014	134.838	96.9716	147.941	116.848	130.89	31.6292	44.8861	32.2808	49.2479	38.8976	43.572
LOC400684	951	0.421279	0.524861	0.0761837	0.220178	0	1.24971	1.4392	1.14986	2.09131	1.18519	1.26069	1.31411	1.51336	1.20911	2.19906	1.24626	1.32564
ACTA2	1851	0.421114	0.888397	0.113381	0.284853	0	0.910506	2.17826	1.85255	2.4205	1.92351	1.61456	0.4919	1.1768	1.00084	1.30767	1.03917	0.872265
RABL2B	2616	0.42068	3.94715	0.000883408	0.0102694	0	12.1401	16.4536	13.9048	19.7319	13.4646	16.6543	4.64071	6.28961	5.31529	7.54277	5.147	6.36633
PLSCR3	2069	0.420257	-0.992801	0.184484	0.386712	0	0.321355	0.525115	0.468462	0.600283	0.408017	0.464463	0.155319	0.253801	0.226419	0.290132	0.197205	0.224487
TRDMT1	7670	0.420195	4.50858	0.000870607	0.0101621	0	20.6381	22.4827	18.3339	26.1994	19.3322	29.416	2.69076	2.93125	2.39034	3.41583	2.5205	3.8352
SIX2	2154	0.420098	-1.75088	0.331343	0.548924	0	0.214237	0.252833	0.191644	0.445371	0.252582	0.176938	0.09946	0.117379	0.088971	0.206765	0.117262	0.0821441
HYMAI	3815	0.420083	0.918799	0.0298173	0.119768	0	1.46395	2.15881	1.83126	2.13004	1.47663	2.07903	0.383736	0.565873	0.480016	0.558332	0.38706	0.544961
SNRK-AS1	3475	0.419674	0.490666	0.145599	0.334403	0	1.33898	0.91409	1.23504	2.1494	0.93261	1.63668	0.385318	0.263047	0.355406	0.618532	0.268377	0.470987
C2	26972	0.419611	1.7193	0.0264839	0.110575	0	2.6244	4.35651	3.42829	3.36933	2.33153	3.4503	0.0973009	0.16152	0.127105	0.12492	0.0864424	0.127922
ERVK13-1	8336	0.419087	5.56551	0.000124778	0.00261098	0	42.9902	50.625	40.3516	56.2136	38.1399	55.625	5.15717	6.07306	4.84064	6.74347	4.57532	6.67287
SLC5A3	11623	0.41905	8.00769	0.000529034	0.00720619	0	231.411	245.015	216.642	325.663	212.596	312.694	19.9098	21.0802	18.6391	28.0189	18.291	26.9031
POT1-AS1	4156	0.418989	-0.957825	0.198018	0.403848	0	0.499886	0.661256	0.361993	0.542191	0.349729	0.420229	0.120281	0.159109	0.0871014	0.13046	0.0841503	0.101114
FAM86HP	2116	0.418836	1.93873	0.0127304	0.0681052	0	3.15999	5.03722	3.0663	4.27944	3.51672	3.69359	1.49338	2.38054	1.4491	2.02242	1.66196	1.74555
LOC104968399	1370	0.418748	-0.230625	0.149833	0.340259	0	0.69627	0.7585	0.468462	1.06502	0.913181	0.973161	0.508226	0.55365	0.341943	0.777386	0.666555	0.710337
TTLL1	1877	0.418396	4.01939	0.000586022	0.00774562	0	13.9611	18.0095	14.0539	20.5839	13.5423	16.9197	7.43799	9.59484	7.4874	10.9664	7.21485	9.01424
TCF7	4188	0.41837	9.73297	0.000633267	0.00820538	0	689.485	979.301	774.964	1112.65	720.83	828.381	164.634	233.835	185.044	265.677	172.118	197.799
ZNF34	2836	0.418025	1.69447	0.0172407	0.083722	0	2.48158	3.26738	2.53395	4.04707	3.20585	3.67147	0.875027	1.15211	0.893495	1.42703	1.13041	1.2946
KANK1	6696	0.417453	3.87862	0.0012542	0.0132663	0	11.9616	14.8977	12.1587	18.8411	13.5811	16.6101	1.78637	2.22487	1.81582	2.81379	2.02825	2.4806
JOSD2	1041	0.417173	3.10423	0.012112	0.0658747	0	6.51637	11.2997	6.89917	10.3985	8.58778	7.63047	6.25972	10.8547	6.62744	9.98891	8.24955	7.32994
SH3BGR	1286	0.417127	1.03941	0.0569838	0.180996	0	1.73175	2.45054	1.23504	2.40113	2.19552	2.05691	1.34662	1.90555	0.96037	1.86713	1.70725	1.59946
CBLN3	2344	0.416788	0.502746	0.0602989	0.188048	0	1.24971	1.49755	1.12857	1.35548	1.16576	1.90209	0.533155	0.638887	0.481471	0.578275	0.497339	0.811471
SURF2	845	0.416486	3.56775	0.00139413	0.0143848	0	9.23004	14.5476	10.6043	13.9033	10.5696	12.076	10.9231	17.2161	12.5494	16.4536	12.5084	14.2912
ZNF565	2220	0.416122	1.90959	0.0119374	0.0651586	0	3.08858	4.06478	2.83207	4.70544	3.63329	3.98111	1.39125	1.83098	1.27571	2.11957	1.63662	1.79329
TMEM249	1674	0.415988	1.19184	0.0342049	0.130669	0	1.69604	2.68392	2.15067	2.92396	1.94294	2.07903	1.01317	1.6033	1.28475	1.74669	1.16066	1.24195
HNRNPM	2636	0.41595	7.39456	7.64802e-05	0.00181464	0	139.111	202.675	148.375	199.41	144.963	174.815	52.7736	76.8874	56.2878	75.6488	54.9934	66.3183
MIRLET7D	87	0.415832	-0.482469	0.182166	0.384358	0	0.803388	0.91409	0.511049	0.755195	0.408017	0.641402	9.23435	10.5068	5.87413	8.6804	4.68985	7.37243
LOC100507557	4155	0.415818	0.873485	0.0357627	0.13435	0	1.32113	2.04212	1.59703	1.91703	1.70979	2.21173	0.317961	0.491484	0.384363	0.46138	0.411501	0.532306
PRMT2	7953	0.415627	6.60569	3.4645e-05	0.00106444	0	81.7313	108.952	82.8539	111.866	85.703	113.042	10.2768	13.6994	10.4179	14.0658	10.7762	14.2137
C9orf139	3815	0.415614	-0.493537	0.133926	0.31756	0	0.571298	0.875192	0.489756	0.697103	0.660599	0.729871	0.149751	0.229408	0.128376	0.182727	0.173158	0.191316
PRKACA	3408	0.415456	6.95312	0.000910368	0.0105262	0	96.2637	162.28	111.643	143.138	110.611	119.279	28.2464	47.6174	32.7591	42.0007	32.4564	34.9996
H1FX	1507	0.415438	9.08699	0.00369908	0.0291975	0	437.132	766.649	497.57	605.666	463.429	492.243	290.068	508.725	330.173	401.902	307.518	326.637
PIK3C2B	7606	0.415379	7.08505	4.36156e-05	0.00123948	0	117.134	150.669	114.837	166.085	117.023	148.672	15.4002	19.8093	15.0982	21.836	15.3856	19.5467
CERS3	4240	0.41522	-1.58435	0.286735	0.504845	0	0.267796	0.291731	0.17035	0.426007	0.31087	0.287525	0.0631594	0.0688044	0.0401768	0.100473	0.0733184	0.0678125
RWDD2B	1705	0.415185	2.99497	0.00162804	0.0161602	0	6.71275	9.12145	6.32424	9.17852	7.36373	8.91327	3.9371	5.34982	3.70923	5.3833	4.31891	5.22773
TFDP2	10141	0.415151	9.21243	3.16657e-05	0.00100343	0	500.475	663.337	504.597	671.872	520.202	698.663	49.3516	65.4114	49.7581	66.253	51.2969	68.8949
RNF32	3813	0.413732	1.94411	0.0214064	0.0967313	0	2.83864	3.53967	3.17276	4.91845	3.80816	4.62252	0.744463	0.928315	0.832091	1.28992	0.99873	1.2123
UCN	615	0.413711	1.76397	0.0183169	0.0871649	0	2.39231	4.27872	3.045	3.77597	3.22528	3.4503	3.88994	6.95726	4.95122	6.13979	5.24435	5.61024
HIST1H1D	777	0.413435	10.524	0.00020433	0.00370213	0	1152.43	1821.76	1312.23	1620.61	1323.9	1603.37	1483.18	2344.61	1688.84	2085.73	1703.86	2063.54
TMEM232	3193	0.413146	-0.676805	0.192424	0.397258	0	0.482033	0.505667	0.447168	0.600283	0.582881	0.928927	0.150966	0.158367	0.140046	0.188	0.18255	0.290926
DGKQ	4643	0.412781	5.84759	0.000322486	0.00509354	0	47.8998	72.6993	50.0828	66.8444	50.1472	57.5935	10.3166	15.6578	10.7867	14.3968	10.8006	12.4044
STK11IP	3624	0.412756	4.95426	0.000269075	0.00447876	0	26.7439	38.6835	25.8293	35.3199	27.1234	32.0701	7.37966	10.6743	7.12729	9.7461	7.48438	8.84936
TBCB	1577	0.412225	5.54301	0.000566439	0.00757269	0	37.4022	60.5438	41.0756	51.9535	41.4817	47.0656	23.7173	38.3918	26.0467	32.9445	26.3042	29.845
KAT2B	4824	0.412136	4.72187	0.000442479	0.0063574	0	23.4411	26.7809	21.4641	30.6532	22.9267	32.8884	4.85926	5.55159	4.44943	6.3543	4.75262	6.81767
CD82	1691	0.412078	6.89244	0.000309298	0.00494191	0	96.4958	147.927	109.556	140.04	99.7504	118.836	57.0644	87.479	64.7878	82.815	58.989	70.2757
FKBP5	10628	0.412065	6.5796	4.24086e-05	0.00122355	0	83.5524	106.987	80.0857	107.354	82.4971	113.196	7.86153	10.0666	7.53535	10.101	7.76224	10.6508
APOLD1	4825	0.412038	3.44602	0.00457133	0.0338359	0	9.92631	10.9302	8.4962	14.8715	9.52039	11.3904	2.05727	2.26532	1.76087	3.08218	1.97314	2.36071
TP53I3	2034	0.411845	2.97706	0.0030421	0.0254719	0	6.01648	9.52987	6.83529	9.12043	7.3443	8.1834	2.95796	4.68529	3.36051	4.48399	3.61077	4.0233
SNORD18B	70	0.411799	-1.76684	0.383865	0.597943	0	0.374914	0.213936	0.127762	0.29046	0.136006	0.375994	5.35592	3.05623	1.82518	4.14942	1.94294	5.37134
C7orf61	1004	0.411463	0.992057	0.0332237	0.128345	0	1.58892	2.04212	1.89514	2.49795	1.55435	2.14538	1.58259	2.03398	1.88759	2.488	1.54816	2.13683
GTF2IRD1P1	2426	0.411394	-0.201147	0.191908	0.396513	0	0.46418	1.05023	0.574931	0.871379	1.10747	0.928927	0.191335	0.432906	0.236987	0.359183	0.456502	0.382905
KIF3A	6347	0.411388	6.47678	0.000953033	0.0109195	0	81.892	86.2745	68.3741	105.592	78.961	113.108	12.9025	13.593	10.7727	16.6365	12.4407	17.8207
KLF8	5421	0.411187	-0.427404	0.169108	0.366967	0	0.482033	0.719602	0.681399	1.06502	0.660599	0.619284	0.0889195	0.132743	0.125696	0.196462	0.121859	0.114238
D2HGDH	2622	0.410774	4.51273	0.000245661	0.00420027	0	19.9776	26.5475	20.3994	26.9159	18.3413	24.5723	7.61922	10.1249	7.78009	10.2654	6.99517	9.37159
DOCK4	8336	0.410296	2.84835	0.00229153	0.0208844	0	6.14146	8.79082	6.26035	8.21032	6.06197	7.51988	0.736739	1.05456	0.751002	0.984923	0.727203	0.902097
HEXA-AS1	2676	0.410093	-1.34653	0.225813	0.439007	0	0.339208	0.388974	0.319406	0.406643	0.252582	0.420229	0.126759	0.145357	0.119359	0.151959	0.0943878	0.157036
UBE2Q2L	498	0.410028	-0.283148	0.142229	0.330472	0	0.749829	1.16692	0.617518	0.793923	0.641169	0.707754	1.50568	2.34322	1.24	1.59422	1.28749	1.42119
ODC1	2626	0.409888	6.80377	5.03948e-05	0.00136309	0	93.1216	130.929	93.4582	127.202	101.208	124.211	35.4614	49.8586	35.5895	48.4394	38.5406	47.3004
UBTD2	3015	0.409773	5.65488	0.000206603	0.00373885	0	43.2044	52.9977	41.3737	56.5234	45.1539	62.8795	14.3298	17.578	13.7226	18.7474	14.9764	20.8556
MRPS28	707	0.409672	3.84743	0.00106518	0.0118286	0	11.8009	17.076	11.2644	15.9559	13.9309	16.1235	16.6915	24.1527	15.9326	22.5685	19.7042	22.8055
CARD8-AS1	1963	0.409068	-0.778863	0.203119	0.410877	0	0.339208	0.486218	0.553637	0.619647	0.524593	0.774106	0.172801	0.247691	0.282036	0.315663	0.267241	0.394348
NES	5558	0.408898	-0.665791	0.291885	0.510293	0	0.357061	0.700154	0.489756	0.987562	0.680028	0.309642	0.0642428	0.125972	0.0881172	0.177683	0.122351	0.0557111
TUBB3	2006	0.408585	2.41923	0.0126428	0.0677877	0	4.44541	7.04043	4.08839	6.02219	5.14878	5.08698	2.21606	3.50969	2.03808	3.00209	2.56669	2.53588
COLQ	3366	0.408308	2.6018	0.0269622	0.111881	0	5.73083	5.44564	5.79189	8.30714	4.04131	6.9006	1.70257	1.61784	1.7207	2.46796	1.20063	2.05009
USP40	5617	0.408292	4.00469	0.00041111	0.00602815	0	14.3539	17.5816	13.1169	18.0279	13.8143	19.2199	2.55543	3.13008	2.33522	3.20952	2.45937	3.42174
ZNF571-AS1	3332	0.408264	-1.12452	0.243321	0.457694	0	0.499886	0.525115	0.234231	0.464735	0.330299	0.442346	0.150026	0.157598	0.0702974	0.139476	0.0991295	0.132757
EPC2	3641	0.408019	5.05879	0.000151667	0.00300694	0	28.6363	39.0725	29.1724	35.2811	28.056	39.59	7.86496	10.7312	8.01219	9.68996	7.70558	10.8734
C2orf42	2524	0.408019	3.94017	0.000470023	0.00659207	0	13.3184	18.029	12.8614	16.1883	13.3091	18.2025	5.2767	7.14301	5.09565	6.41374	5.27303	7.21178
RABEP1	6132	0.407999	7.04683	0.000189926	0.00350831	0	111.314	138.786	105.383	152.84	124.154	160.682	18.1529	22.6331	17.1857	24.9249	20.2469	26.2039
LRP12	4149	0.407882	6.72803	9.77105e-05	0.00216377	0	94.5141	121.127	88.3051	111.982	90.4437	129.497	22.78	29.1942	21.2835	26.9901	21.7989	31.2116
PCNXL2	6817	0.407562	5.6987	9.44419e-05	0.0021099	0	45.1147	56.7125	45.2279	62.7199	43.5218	58.1243	6.61797	8.31927	6.63457	9.20051	6.3843	8.52637
ZFX	7883	0.407488	6.17336	0.000150771	0.00299701	0	65.1816	75.5777	61.5814	84.8335	59.279	86.3902	8.26862	9.58743	7.81193	10.7616	7.51986	10.959
STRADA	2883	0.407459	5.67002	6.0115e-05	0.00153293	0	43.9364	57.9766	43.929	57.1043	43.3664	58.9868	15.2398	20.1098	15.2372	19.8073	15.0421	20.4602
ARFIP1	3230	0.407166	4.55445	0.00291044	0.0247249	0	19.9062	21.5686	18.6107	29.8592	21.9941	28.8631	6.1629	6.67759	5.76183	9.24435	6.8093	8.93594
LOC101927666	6113	0.406935	-1.65356	0.453841	0.657259	0	0.267796	0.194487	0.404581	0.251732	0.0582881	0.530815	0.0438076	0.0318153	0.0661837	0.0411797	0.00953511	0.0868338
SPECC1L	7174	0.406741	5.9373	6.3577e-05	0.00159483	0	51.524	69.9765	52.7446	71.4918	53.7417	67.9886	7.18204	9.75418	7.35218	9.9654	7.49117	9.47708
CRB1	5585	0.406383	-1.40613	0.301829	0.520252	0	0.249943	0.311179	0.298112	0.271096	0.330299	0.597167	0.0447525	0.055717	0.0533773	0.0485399	0.0591404	0.106923
TBC1D16	11303	0.4062	5.90232	0.000302728	0.0048833	0	47.6855	69.8598	54.1925	73.1571	52.401	61.3534	4.21884	6.18064	4.79453	6.47236	4.63603	5.42806
CCDC101	1151	0.406192	4.84842	0.000166936	0.00321949	0	25.0836	34.5798	23.998	32.7057	25.161	31.0969	21.7928	30.0433	20.8497	28.4151	21.8602	27.0173
FAM161B	3596	0.406092	3.23885	0.00105592	0.0117517	0	8.35524	11.1636	7.96385	10.3404	7.94661	10.6605	2.32348	3.10444	2.21464	2.87552	2.20985	2.96455
TMEM140	2055	0.405436	-1.14353	0.199732	0.406431	0	0.357061	0.486218	0.319406	0.464735	0.388588	0.464463	0.173752	0.236602	0.155429	0.226149	0.189094	0.226016
ZNF117	6404	0.405396	5.43758	0.00582067	0.0396429	0	41.0442	37.4582	36.9659	55.4584	33.7488	55.1827	6.40915	5.84919	5.77231	8.65996	5.26996	8.61691
RAPGEF1	6483	0.40512	7.7919	0.000153198	0.00303332	0	186.582	273.546	194.454	258.916	190.991	224.955	28.7803	42.1944	29.9945	39.9376	29.4602	34.6992
ABCA3	6623	0.404546	2.34564	0.00739373	0.0468982	0	4.6418	5.07611	4.02451	6.25456	4.35218	5.92744	0.70086	0.766437	0.607657	0.94437	0.657131	0.894978
INIP	1519	0.404208	4.75302	0.000478785	0.00667786	0	24.7444	29.0175	20.9317	30.0141	23.8398	33.0432	16.2899	19.103	13.7799	19.7592	15.6944	21.7533
LINC01006	758	0.404172	-0.946925	0.231801	0.445061	0	0.428474	0.661256	0.298112	0.387279	0.505164	0.597167	0.565269	0.87237	0.393288	0.510923	0.666443	0.787819
GXYLT1	7488	0.403997	6.10584	0.00156993	0.0157497	0	62.9499	64.2002	58.5152	81.4836	56.3063	89.6193	8.40677	8.57375	7.81452	10.8819	7.51954	11.9684
GNAZ	3208	0.403797	4.76597	0.000463814	0.00654134	0	21.6379	28.998	23.9341	33.945	24.6364	29.9026	6.74499	9.03929	7.46077	10.5814	7.67969	9.32126
EIF4EBP2	7531	0.403764	8.19587	3.5781e-05	0.00108612	0	250.568	330.764	255.376	345.55	251.358	325.545	33.2715	43.9204	33.9099	45.8837	33.3764	43.2273
LDB3	6521	0.403198	0.0197231	0.0914432	0.248372	0	0.92836	1.24472	0.766574	1.06502	0.816034	1.0174	0.142365	0.190878	0.117555	0.163321	0.125139	0.156018
RMST	2099	0.403173	2.99406	0.00192258	0.018235	0	6.55208	8.90751	6.55847	9.04297	7.38316	9.15656	3.12152	4.24369	3.12457	4.30823	3.51747	4.36235
ZNF337-AS1	2472	0.403049	3.45796	0.00102587	0.0115165	0	10.0334	12.6028	8.68784	12.3929	9.55925	12.4299	4.05883	5.09821	3.5145	5.01332	3.86701	5.02829
BCL2L11	6212	0.403029	6.21268	0.000174867	0.00333171	0	65.5208	86.5273	68.1825	84.7561	57.8413	81.9667	10.5475	13.9291	10.9759	13.6439	9.31121	13.1949
LRRC46	1922	0.403015	0.0502309	0.126275	0.305795	0	0.607004	1.12803	0.894336	1.25866	1.08805	1.0174	0.315819	0.586902	0.465315	0.654869	0.5661	0.529342
LINC00461	4186	0.402971	0.00686422	0.0953815	0.255391	0	0.946213	1.14747	0.766574	0.968198	0.777175	1.19433	0.226042	0.274122	0.183128	0.231294	0.185661	0.285316
MIR3605	100	0.40285	-0.873548	0.245113	0.459724	0	0.374914	0.544564	0.660105	0.677739	0.291441	0.508698	3.74914	5.44564	6.60105	6.77739	2.91441	5.08698
SCN9A	9760	0.402401	-2.13234	0.372395	0.588181	0	0.107118	0.233385	0.212937	0.213004	0.174864	0.199056	0.0109752	0.0239124	0.0218173	0.0218241	0.0179164	0.0203951
PATZ1	4817	0.402297	6.62818	0.000443217	0.0063574	0	80.196	124.238	91.3075	114.577	84.0903	98.8865	16.6485	25.7917	18.9553	23.7859	17.457	20.5286
PYGB	4131	0.401715	6.57493	5.57429e-05	0.00146586	0	79.9639	111.616	82.6196	108.748	83.7795	105.079	19.357	27.0192	19.9999	26.3249	20.2807	25.4368
HIST1H3I	477	0.401676	8.76081	0.00122658	0.013047	0	316.874	553.919	390.442	476.838	413.982	450.419	664.306	1161.26	818.536	999.66	867.886	944.274
MIR98	119	0.401536	-0.927415	0.219895	0.432228	0	0.428474	0.388974	0.361993	0.580919	0.466305	0.707754	3.60062	3.26869	3.04196	4.88167	3.91853	5.94751
NIN	10936	0.401529	7.61318	0.000184752	0.00346498	0	173.514	197.91	162.578	239.861	169.968	230.728	15.8663	18.0971	14.8663	21.9332	15.5421	21.098
COL5A1	8508	0.40103	3.28058	0.00353418	0.0282791	0	7.73038	10.1133	9.07113	12.6253	8.25748	10.3067	0.908601	1.18868	1.06619	1.48393	0.970555	1.21141
LINC00476	9171	0.400827	2.05876	0.0114337	0.0633083	0	3.767	5.17336	3.7477	4.22134	3.16699	4.71099	0.410751	0.5641	0.408646	0.460293	0.345326	0.513683
HIST1H2AC	546	0.400512	8.83771	0.00188998	0.0180387	0	325.961	587.351	415.355	486.946	441.921	487.443	596.999	1075.73	760.724	891.842	809.379	892.753
LRRC29	1493	0.400472	2.16606	0.0146771	0.0752585	0	3.24926	5.52343	3.76899	4.97654	4.50762	4.68887	2.17633	3.69955	2.52444	3.33325	3.01917	3.14057
C15orf62	2489	0.400093	-1.65735	0.30307	0.521286	0	0.23209	0.350077	0.17035	0.329187	0.31087	0.265408	0.0932462	0.14065	0.0684411	0.132257	0.124898	0.106632
NEDD9	5780	0.399094	2.44669	0.02602	0.109479	0	5.23095	6.80705	5.40861	5.82855	3.38071	5.83897	0.905008	1.17769	0.935745	1.0084	0.584898	1.0102
PPP1R21	3215	0.398959	4.18113	0.00166379	0.0163965	0	16.6569	18.6513	15.225	19.3446	14.9606	23.8425	5.181	5.80134	4.73562	6.01698	4.65338	7.416
CHRNB4	2448	0.398842	-1.00431	0.258673	0.473634	0	0.410621	0.661256	0.468462	0.580919	0.31087	0.309642	0.167737	0.270121	0.191365	0.237304	0.126989	0.126488
SLFN5	4647	0.39856	6.66867	0.000563959	0.00755955	0	92.711	99.7136	88.9226	124.568	81.5839	122.729	19.9507	21.4576	19.1355	26.8062	17.5563	26.4104
MOB3C	2985	0.398207	3.81116	0.000621641	0.00809083	0	11.5688	16.1619	12.904	15.8591	11.7936	15.7475	3.87564	5.41437	4.32295	5.31293	3.95097	5.27555
YJEFN3	1032	0.397977	2.35732	0.0398816	0.143874	0	4.32044	4.62879	3.96063	7.76495	4.87677	4.93216	4.18648	4.48527	3.83782	7.52418	4.72556	4.77922
PAQR4	2793	0.397943	6.20051	0.000542657	0.00733107	0	59.8078	93.9762	63.4979	82.3743	67.0119	74.3584	21.4135	33.647	22.7347	29.4931	23.9928	26.6231
PPP1R13B	4959	0.397533	5.24937	0.000232585	0.00406339	0	31.9927	44.4403	33.8996	45.5828	32.5248	39.5679	6.45144	8.96155	6.83598	9.19193	6.55874	7.979
CTD-2201I18.1	2715	0.397526	1.17492	0.084072	0.235473	0	1.7496	1.80873	1.72479	3.34997	2.27324	2.41079	0.64442	0.666199	0.635282	1.23387	0.837288	0.887951
NTNG2	3091	0.397315	4.53023	0.00184723	0.0177425	0	18.7636	27.9867	21.2085	28.8136	19.7985	21.8298	6.07039	9.05425	6.86139	9.32177	6.40522	7.06237
PCDHGB8P	1973	0.397216	-1.71767	0.415012	0.625637	0	0.142825	0.252833	0.361993	0.484099	0.194294	0.154821	0.0723895	0.128147	0.183474	0.245362	0.0984763	0.0784699
ZNF487	1491	0.397138	-0.326125	0.151195	0.342221	0	0.624857	0.952987	0.809161	0.697103	0.544023	0.951044	0.419086	0.63916	0.542697	0.46754	0.364871	0.637856
ATP6V0D1	1670	0.396926	4.60291	0.00104455	0.0116593	0	19.5134	29.4454	21.1021	29.3945	22.2466	23.8646	11.6847	17.6319	12.636	17.6015	13.3213	14.2902
NAIP	28605	0.396784	1.09063	0.058713	0.184393	0	2.19593	1.98377	1.53315	2.32368	1.67093	2.85313	0.0767673	0.0693504	0.0535972	0.0812332	0.0584138	0.0997424
CBX5	11868	0.396758	10.3367	0.000137012	0.00279693	0	1123.26	1374.42	1161.04	1529.58	1065.08	1505.61	94.6462	115.809	97.8295	128.883	89.7438	126.863
ARNTL2	7444	0.39675	5.42726	0.00111643	0.0122018	0	35.6347	41.0173	38.4991	54.587	37.2461	51.0246	4.78704	5.51012	5.17182	7.33302	5.00351	6.85446
PITX1	2383	0.396691	4.50347	0.00101435	0.0114429	0	18.9243	28.648	19.3986	26.2188	20.3426	22.3164	7.94136	12.0218	8.1404	11.0024	8.53653	9.36482
GNG7	4246	0.396257	3.49586	0.00111972	0.0122018	0	8.99795	13.2251	10.0506	12.664	10.1033	12.452	2.11916	3.11473	2.36708	2.98258	2.37948	2.93265
TIMP1	916	0.396215	-0.602564	0.241168	0.455482	0	0.428474	0.641808	0.830455	0.852015	0.369158	0.619284	0.467766	0.700663	0.90661	0.930147	0.403011	0.676075
RBM4B	1844	0.396163	4.7283	0.000245688	0.00420027	0	22.9769	30.6123	21.677	28.7168	23.9176	30.9421	12.4604	16.601	11.7554	15.5731	12.9705	16.7799
SOX15	1394	0.395937	-1.50255	0.418385	0.629009	0	0.357061	0.622359	0.127762	0.19364	0.31087	0.24329	0.256142	0.446455	0.0916516	0.138909	0.223006	0.174527
CXorf58	1547	0.395826	-2.24217	0.41022	0.621318	0	0.214237	0.213936	0.106469	0.154912	0.116576	0.221173	0.138485	0.138291	0.0688226	0.100137	0.0753563	0.142969
SCN3A	9217	0.395816	7.1572	0.00230052	0.0209154	0	126.221	128.167	115.071	179.62	128.428	178.73	13.6944	13.9055	12.4847	19.4879	13.9338	19.3913
BAIAP2-AS1	4421	0.395709	5.0499	0.00020432	0.00370213	0	27.6544	38.3723	29.1937	39.2895	28.9109	35.1223	6.25524	8.67956	6.60341	8.88701	6.53945	7.94442
FRMPD1	4916	0.395483	-0.50863	0.19143	0.395959	0	0.64271	0.855743	0.361993	0.716467	0.699458	0.685636	0.130738	0.174073	0.0736357	0.145742	0.142282	0.13947
IL21R-AS1	2614	0.39485	-1.43063	0.412537	0.623498	0	0.0714123	0.311179	0.383287	0.348551	0.427446	0.486581	0.0273192	0.119043	0.146629	0.13334	0.163522	0.186144
C17orf97	1839	0.394838	3.59661	0.00320591	0.0262344	0	9.39071	14.3726	11.1153	14.9103	10.7833	11.7885	5.10642	7.81544	6.04422	8.10781	5.86368	6.41029
RBM23	2604	0.394811	6.38449	8.93841e-05	0.00204208	0	71.4837	96.524	72.3987	98.4851	72.5881	89.5751	27.4515	37.0676	27.8029	37.8207	27.8756	34.399
LOC731157	475	0.394653	-0.815607	0.204449	0.412521	0	0.589151	0.525115	0.383287	0.600283	0.388588	0.685636	1.24032	1.10551	0.80692	1.26375	0.818079	1.44344
FUS	5119	0.394514	8.23692	0.00059963	0.00787736	0	250.978	368.028	287.785	359.899	243.275	299.955	49.0288	71.8945	56.2189	70.3064	47.524	58.5964
LOC101928068	4834	0.394329	2.92699	0.00402473	0.0311034	0	7.08767	9.23814	6.64364	7.97795	5.8871	8.58151	1.46621	1.91108	1.37436	1.65038	1.21785	1.77524
FAM149B1	3132	0.394207	4.5509	0.000356004	0.00547452	0	21.745	26.0418	19.5476	25.909	19.3711	27.8236	6.94286	8.31476	6.24126	8.27235	6.18489	8.88364
UROS	1354	0.393757	4.36602	0.000782585	0.00945258	0	16.8711	26.0029	18.4404	22.5009	18.0887	21.6086	12.4602	19.2045	13.6192	16.6181	13.3595	15.9591
ZMIZ2	5209	0.393508	6.76403	0.000275197	0.00455564	0	92.3539	123.13	96.9929	136.38	92.445	110.587	17.7297	23.6379	18.6203	26.1817	17.7472	21.2299
TTN	116853	0.393406	6.22793	0.0109648	0.0615124	0	66.6455	62.1192	63.6682	102.687	63.9809	90.4376	0.570336	0.531601	0.544857	0.878772	0.547534	0.773944
LINC00094	5734	0.393251	4.87435	0.000536959	0.0072814	0	24.6908	34.0741	26.1274	36.1332	25.1805	29.5487	4.30603	5.94247	4.55657	6.30156	4.39143	5.15325
GALNT10	5955	0.392722	4.9571	0.000447918	0.00641874	0	26.1012	36.2913	26.319	37.7016	28.0754	31.6499	4.38307	6.09426	4.41965	6.33109	4.7146	5.31484
LEAP2	707	0.392559	0.483427	0.10032	0.263902	0	1.35683	1.22527	1.23504	1.83958	0.93261	1.57033	1.91914	1.73305	1.74687	2.60195	1.31911	2.22112
POMK	1623	0.392551	5.54907	0.000127138	0.00263802	0	41.2227	55.7984	40.5007	51.605	39.6554	51.9314	25.3991	34.3798	24.9542	31.796	24.4334	31.9972
FXN	7454	0.392478	3.85176	0.00058585	0.00774562	0	12.4793	15.9285	12.4142	17.2146	12.4737	15.9023	1.67417	2.13691	1.66545	2.30944	1.67342	2.1334
RSPH14	1252	0.392069	-0.344023	0.150528	0.341427	0	0.624857	0.875192	0.766574	0.697103	0.563452	0.995279	0.499087	0.699035	0.61228	0.556791	0.450041	0.794951
ESPNL	4822	0.391921	0.387535	0.0801409	0.227876	0	1.1783	1.69204	1.0221	1.25866	1.08805	1.37127	0.24436	0.3509	0.211966	0.261024	0.225642	0.284378
WDR31	2507	0.391433	2.23986	0.0116024	0.0639991	0	3.89197	5.17336	3.76899	4.82163	4.50762	5.99379	1.55244	2.06357	1.50339	1.92327	1.79801	2.39082
ZC3H10	2497	0.39142	4.74076	0.00024337	0.00417951	0	21.8879	31.3513	23.8703	29.9367	23.5678	29.6151	8.76566	12.5556	9.55958	11.9891	9.43846	11.8603
CEP170B	6810	0.391406	3.85227	0.000913335	0.0105364	0	12.2472	16.5898	12.2865	17.4663	12.8622	14.9734	1.79841	2.43609	1.80418	2.5648	1.88873	2.19874
MAP2K7	3546	0.390904	6.67228	0.000625674	0.00812787	0	85.6412	128.77	91.8611	118.856	87.199	99.373	24.1515	36.3141	25.9056	33.5183	24.5908	28.024
DGCR6L	1217	0.390802	5.54173	0.000741264	0.00909143	0	38.3127	60.1938	40.0535	50.0946	42.492	48.1272	31.4813	49.4608	32.9117	41.1624	34.9154	39.5458
ZNF407	9037	0.390395	5.52992	0.000505479	0.0069769	0	42.7581	46.8325	37.7325	54.3353	39.3639	56.001	4.73145	5.18231	4.17533	6.01254	4.35586	6.19686
BRPF3	6023	0.390266	5.22049	0.00126638	0.0133271	0	31.1715	38.0222	32.771	49.533	32.7968	39.1919	5.1754	6.31284	5.44098	8.22398	5.44526	6.50703
DUSP28	1555	0.390012	2.97079	0.00308292	0.0256805	0	6.94484	9.0631	7.1121	8.28778	6.2174	9.22291	4.46614	5.82836	4.5737	5.32976	3.99833	5.93113
DECR2	3166	0.38998	4.07305	0.00276207	0.0237576	0	13.9968	21.6659	15.1611	19.5189	14.4749	15.9245	4.42097	6.84329	4.78873	6.16515	4.57198	5.02983
HIST1H2AM	487	0.389877	8.76538	0.000368996	0.00562859	0	332.281	518.6	392.912	463.728	404.889	498.347	682.302	1064.89	806.8	952.214	831.394	1023.3
CCDC146	3333	0.389725	1.6313	0.0708048	0.209644	0	2.49943	2.33385	3.10888	4.02771	2.37038	4.0917	0.749904	0.700224	0.932758	1.20843	0.711186	1.22763
DHFR	3917	0.389658	6.50567	8.61107e-05	0.0019856	0	81.1422	100.958	79.6811	103.733	75.0945	104.394	20.7154	25.7744	20.3424	26.4827	19.1714	26.6514
RDH5	1342	0.389616	0.454565	0.088301	0.242652	0	1.24971	1.40031	0.873043	1.60721	1.3212	1.52609	0.931233	1.04345	0.650553	1.19762	0.984499	1.13718
TUBB2A	1753	0.389579	2.07125	0.0106806	0.0603431	0	3.37423	4.93997	3.68381	4.9959	3.7693	4.2244	1.92483	2.81801	2.10143	2.84992	2.1502	2.40981
FBXL5	3644	0.389165	6.10735	0.000431379	0.00624675	0	60.3791	73.1466	55.7257	74.6481	62.8929	86.6998	16.5695	20.0732	15.2924	20.4852	17.2593	23.7925
HIST1H2BF	430	0.388679	8.70357	0.000600817	0.00788612	0	312.304	489.913	365.145	452.032	405.744	476.119	726.288	1139.33	849.174	1051.24	943.59	1107.25
PAX9	3106	0.388647	4.4245	0.000251906	0.00427282	0	18.4244	24.1553	18.3978	24.6891	18.8854	24.0857	5.93186	7.77698	5.9233	7.94883	6.08028	7.75458
LY6G5C	5082	0.388517	-0.230915	0.183448	0.385794	0	0.660564	0.719602	0.532343	1.1812	0.913181	0.862575	0.129981	0.141598	0.104751	0.232429	0.179689	0.169731
HIST1H4A	372	0.388393	7.63	0.00191045	0.0181883	0	146.592	256.373	184.638	219.239	183.491	197.994	394.063	689.175	496.338	589.352	493.255	532.242
MRPS33	817	0.388347	4.26767	0.000544963	0.00735045	0	16.5676	21.4325	15.6296	21.1842	17.7584	22.8029	20.2786	26.2332	19.1305	25.9292	21.7362	27.9106
STS	6377	0.388075	3.23048	0.00311808	0.0257854	0	7.78394	10.8524	8.90078	11.3086	7.63574	9.62103	1.22063	1.7018	1.39576	1.77333	1.19739	1.50871
STX1A	2125	0.387783	2.38317	0.0128441	0.0685277	0	4.78462	5.2706	3.91805	6.69993	4.74077	5.63991	2.25159	2.48028	1.84379	3.15291	2.23095	2.65408
POLR2J2	1987	0.387567	-1.22961	0.250448	0.465521	0	0.374914	0.369526	0.298112	0.406643	0.330299	0.552933	0.188684	0.185972	0.150031	0.204652	0.16623	0.278275
NFE2L3	3710	0.387055	4.01646	0.00179011	0.0173369	0	14.6752	20.1878	13.2873	15.9559	14.0086	18.7776	3.95559	5.44145	3.58148	4.30078	3.7759	5.06134
LINC01134	1952	0.387052	-0.894816	0.245995	0.460636	0	0.499886	0.700154	0.276818	0.522827	0.505164	0.464463	0.256089	0.358685	0.141813	0.267842	0.258793	0.237942
LOC101927768	2007	0.38691	-0.749672	0.227482	0.4405	0	0.392768	0.622359	0.574931	0.813287	0.485734	0.442346	0.195699	0.310094	0.286463	0.405225	0.24202	0.220402
PTPRC	11338	0.386893	9.52933	0.000886648	0.0102912	0	665.455	708.108	628.846	867.874	626.967	936.292	58.6925	62.4544	55.4636	76.5456	55.2978	82.58
TBL1X	6018	0.386493	5.94138	0.000186772	0.00348403	0	52.6487	73.6328	52.5529	70.5042	54.5188	64.6268	8.74854	12.2354	8.73262	11.7156	9.05929	10.7389
IKBKE	3474	0.38642	5.12569	0.000220056	0.00389846	0	29.1184	39.3059	30.4926	41.5357	31.1064	37.71	8.38179	11.3143	8.77738	11.9562	8.95407	10.8549
RTBDN	2365	0.386289	-0.473525	0.159219	0.353414	0	0.553445	0.855743	0.638812	0.832651	0.582881	0.619284	0.234015	0.361837	0.270111	0.352072	0.246461	0.261854
DHRS12	2779	0.386288	1.81612	0.0171738	0.083613	0	2.98146	4.23982	3.10888	4.22134	2.97269	3.36183	1.07285	1.52566	1.11871	1.51902	1.0697	1.20973
LOC283140	2749	0.386031	0.808609	0.0734805	0.214701	0	1.85672	1.86708	1.32021	1.76212	1.26291	2.21173	0.675416	0.679184	0.480251	0.641004	0.459407	0.804558
MVB12B	6760	0.385928	6.28307	0.000443064	0.0063574	0	66.4134	97.4381	70.6952	88.0673	65.3798	79.0251	9.82447	14.4139	10.4579	13.0277	9.67158	11.6901
ADPRHL1	2178	0.385772	1.49372	0.0394811	0.142964	0	2.30305	3.52022	2.00161	2.80778	2.91441	3.11854	1.05741	1.61626	0.919013	1.28915	1.33811	1.43184
ZACN	1473	0.385514	-1.62474	0.388212	0.602126	0	0.214237	0.272282	0.425874	0.329187	0.116576	0.375994	0.145443	0.184849	0.28912	0.223481	0.0791421	0.255257
LINC01221	662	0.385482	2.82704	0.0112619	0.0627377	0	7.06982	7.11823	6.15389	8.63633	5.12936	8.24975	10.6795	10.7526	9.2959	13.0458	7.74827	12.4619
TMEM63A	4453	0.38539	6.31655	0.00010038	0.00220996	0	70.3768	93.8206	68.4593	87.6994	68.4303	89.2212	15.8044	21.0691	15.3738	19.6945	15.3672	20.0362
TNFAIP3	4738	0.3853	7.27724	0.00011667	0.00248901	0	137.486	181.068	139.942	179.678	126.077	166.256	29.0178	38.216	29.5362	37.9228	26.6098	35.0899
MIB2	3574	0.385154	6.03563	0.000871139	0.0101621	0	52.9522	77.542	57.9402	80.9995	59.7259	64.2065	14.8159	21.6961	16.2116	22.6635	16.7112	17.9649
C11orf94	368	0.384829	0.124766	0.180163	0.382043	0	0.839094	1.14747	1.19245	1.58785	0.718887	0.81834	2.28015	3.11814	3.24035	4.3148	1.9535	2.22375
CASC2	5214	0.384741	1.02501	0.0444192	0.1546	0	1.96384	2.11991	1.44797	2.28495	1.76807	2.38867	0.376647	0.40658	0.277709	0.438233	0.339101	0.458126
MESTIT1	3242	0.384629	-1.88328	0.340575	0.558421	0	0.178531	0.291731	0.234231	0.213004	0.194294	0.287525	0.0550681	0.0899848	0.0722489	0.0657013	0.0599302	0.0886875
MARCKSL1	1562	0.38455	8.20563	0.00050816	0.00699507	0	246.426	365.305	261.615	349.016	260.198	288.498	157.763	233.87	167.487	223.442	166.58	184.698
LOC100506023	5619	0.384281	1.16512	0.0323896	0.126445	0	1.83887	2.33385	2.0229	2.78841	1.88465	2.36655	0.327259	0.415349	0.360011	0.496247	0.335407	0.421169
HIST1H1B	790	0.384148	10.6062	0.000779762	0.00944159	0	1161.13	1843.15	1457.02	1713.85	1439.31	1738.27	1469.78	2333.11	1844.33	2169.43	1821.91	2200.34
ADAMTSL5	2857	0.384133	2.5432	0.0129148	0.068756	0	4.87389	5.97076	4.34392	7.18403	5.84824	6.5246	1.70595	2.08987	1.52045	2.51454	2.04699	2.28373
RSRP1	1465	0.383969	5.25951	0.00110302	0.0121069	0	33.4209	37.75	32.2174	49.4362	33.982	42.8191	22.8129	25.7679	21.9914	33.7449	23.1959	29.2281
PPM1L	3056	0.383738	5.2141	0.000222747	0.00393234	0	32.9211	39.6365	31.0888	43.5883	32.5248	42.7527	10.7726	12.9701	10.173	14.2632	10.6429	13.9898
KDM8	2672	0.383451	3.54012	0.00653203	0.0430926	0	10.6761	15.4228	10.5404	12.5866	8.97637	11.3462	3.99556	5.77202	3.94476	4.71055	3.35942	4.24632
PYCRL	5356	0.383381	4.11959	0.00637841	0.0423282	0	14.818	22.5022	15.1398	21.0874	15.2132	15.2609	2.76663	4.2013	2.82671	3.93715	2.8404	2.84932
IFT88	3160	0.383296	4.48866	0.00148302	0.0150659	0	21.2273	22.5605	17.6951	26.1994	19.4099	27.4033	6.7175	7.1394	5.59971	8.29096	6.14239	8.67194
XYLT1	9336	0.383274	5.24714	0.00216439	0.0200391	0	31.2072	42.3204	33.9635	50.172	33.6517	36.3166	3.34267	4.53303	3.63791	5.37404	3.60451	3.88995
FAM120AOS	2765	0.383084	5.4138	0.000142046	0.00288028	0	37.6343	47.2215	37.264	48.4099	36.0221	49.0341	13.6109	17.0783	13.477	17.5081	13.0279	17.7338
CHST6	6885	0.382955	-1.97545	0.451524	0.655791	0	0.321355	0.15559	0.127762	0.251732	0.0971469	0.33176	0.0466747	0.0225984	0.0185566	0.0365623	0.0141099	0.0481858
GAS2L2	3014	0.382923	-0.978211	0.296765	0.51573	0	0.553445	0.60291	0.298112	0.658375	0.349729	0.309642	0.183625	0.200037	0.0989091	0.218439	0.116035	0.102735
PBRM1	7574	0.382537	8.31958	0.000218142	0.00388872	0	282.007	324.463	278.564	374.538	271.448	385.681	37.2336	42.839	36.779	49.4505	35.8394	50.9218
PPP1R12C	2965	0.382497	6.44997	0.00029471	0.00479207	0	71.0731	97.3019	76.5935	106.947	79.9713	92.4503	23.9707	32.8168	25.8326	36.0699	26.9718	31.1805
LOC101928069	846	0.38236	1.37624	0.0275863	0.113392	0	2.48158	2.87841	2.21455	2.78841	1.96237	3.03007	2.93331	3.40238	2.61767	3.29599	2.31958	3.58164
STK4	6330	0.382081	7.436	0.000228331	0.00401221	0	147.948	177.47	144.457	206.246	158.602	204.076	23.3726	28.0363	22.821	32.5822	25.0556	32.2395
CLDN15	2244	0.381212	4.37544	0.00377839	0.0296689	0	17.4424	21.7048	18.4191	28.2327	18.147	20.3479	7.77293	9.67236	8.20814	12.5814	8.08691	9.0677
CCDC183-AS1	2386	0.380586	4.28016	0.00126698	0.0133271	0	16.7105	21.5103	18.1423	24.1081	15.7184	20.171	7.00355	9.0152	7.60363	10.104	6.58775	8.45389
APLP2	3992	0.38045	7.16053	6.35953e-05	0.00159483	0	120.758	163.583	123.993	162.096	128.098	159.665	30.25	40.9777	31.0605	40.6052	32.0886	39.9962
MIR425	87	0.380291	-0.687516	0.238414	0.452254	0	0.589151	0.719602	0.617518	0.716467	0.31087	0.530815	6.77185	8.27129	7.09791	8.23525	3.57322	6.10132
MIR648	94	0.380074	-0.846545	0.261073	0.476606	0	0.285649	0.700154	0.596224	0.464735	0.485734	0.597167	3.03882	7.44844	6.34281	4.94399	5.16739	6.35284
ADAMTS10	4364	0.37996	5.1684	0.000906173	0.0104857	0	30.2788	40.57	33.0266	45.2536	30.3875	36.0291	6.93831	9.29652	7.56796	10.3698	6.96323	8.25598
FLJ31104	2287	0.37991	0.121567	0.108293	0.277362	0	0.856947	1.30306	0.830455	1.02629	1.04919	1.23857	0.374704	0.56977	0.36312	0.44875	0.458761	0.541569
BARHL2	1496	0.379709	2.34733	0.0252569	0.107589	0	3.87412	6.12635	4.45039	6.50629	4.85734	4.46769	2.58965	4.09515	2.97486	4.34913	3.24689	2.98643
RBX1	906	0.379341	5.75808	0.000289786	0.00473505	0	46.7572	64.6864	46.3564	55.807	47.9323	62.9901	51.6084	71.3978	51.166	61.5971	52.9054	69.5255
BMPR2	12070	0.379243	6.1586	0.000833765	0.00990456	0	62.6464	69.1596	60.2399	86.5957	63.3203	86.4786	5.19026	5.72988	4.99088	7.17445	5.24609	7.16476
SCARF1	7044	0.379231	-0.495175	0.195291	0.400905	0	0.624857	0.952987	0.553637	0.774559	0.563452	0.530815	0.0887077	0.135291	0.0785969	0.10996	0.0799903	0.0753571
EEFSEC	2229	0.379138	4.95639	0.000675165	0.00851518	0	26.494	36.019	27.7244	37.9727	26.6765	31.1633	11.886	16.1593	12.4381	17.0358	11.9679	13.9808
RNU12	149	0.379043	4.87021	0.0352934	0.133049	0	18.5315	32.246	31.5573	37.8953	26.2102	28.8852	124.372	216.416	211.794	254.331	175.908	193.86
MIR4473	91	0.378878	-1.97486	0.412341	0.623326	0	0.23209	0.15559	0.106469	0.251732	0.213723	0.33176	2.55044	1.70978	1.16998	2.76628	2.34861	3.64571
OGFOD3	4513	0.378505	5.38644	0.000881966	0.0102678	0	36.7416	53.0561	38.2222	45.8539	34.0791	42.797	8.14128	11.7563	8.46936	10.1604	7.55132	9.48304
RMND5B	2106	0.378247	4.83518	0.000646044	0.00827187	0	24.548	33.6074	26.3829	33.6933	23.4707	29.3497	11.6562	15.9579	12.5275	15.9987	11.1447	13.9362
PNPLA7	4842	0.37806	2.23956	0.0138536	0.0721598	0	4.15976	4.5899	4.00322	6.08029	4.06074	5.21968	0.859101	0.947934	0.82677	1.25574	0.838649	1.078
AP4S1	6323	0.377816	2.62281	0.00917975	0.0543738	0	5.80225	6.92374	5.04661	7.68749	5.10993	6.12649	0.917641	1.09501	0.798136	1.2158	0.808149	0.968922
AHNAK2	18317	0.377699	0.0711914	0.133185	0.316497	0	0.981919	1.38086	0.958218	1.00693	0.699458	1.03951	0.053607	0.0753867	0.052313	0.0549722	0.0381862	0.0567513
HIST1H2BL	453	0.377621	8.3175	0.00120791	0.0129028	0	235.553	387.73	286.145	342.587	310.773	351.156	519.985	855.915	631.667	756.263	686.033	775.18
PRR7	1563	0.376701	3.3546	0.00702587	0.045151	0	8.05173	13.5558	9.39053	10.5146	9.19009	10.4615	5.15146	8.67291	6.00802	6.72721	5.87978	6.69321
ATG7	5051	0.376592	4.38341	0.000651892	0.00833266	0	17.9066	21.802	17.759	25.1151	18.7299	23.7097	3.54516	4.31637	3.51593	4.9723	3.70816	4.69407
TMEM169	3461	0.376408	2.29483	0.0100572	0.0578786	0	3.99909	5.81517	4.25874	4.95718	4.46876	5.7505	1.15547	1.6802	1.2305	1.4323	1.29117	1.66151
HIST1H1C	732	0.376172	9.92613	0.000780788	0.00944617	0	748.633	1195.73	896.423	1075.71	895.189	1025.45	1022.72	1633.51	1224.62	1469.55	1222.94	1400.88
MIR4774	76	0.376133	-1.67142	0.339583	0.557182	0	0.249943	0.213936	0.191644	0.348551	0.272011	0.375994	3.28872	2.81495	2.52163	4.5862	3.5791	4.94729
RNU5F-1	116	0.376036	1.0966	0.0703932	0.208781	0	1.71389	2.48944	2.3636	2.16876	1.43777	2.47714	14.775	21.4607	20.3759	18.6962	12.3946	21.3546
DTWD2	5925	0.375796	4.30808	0.00108483	0.0119505	0	17.6388	21.2769	15.7574	21.6102	18.2248	24.1521	2.97702	3.59104	2.65947	3.64729	3.07591	4.0763
ATP6V0E2	2801	0.375533	6.181	0.000510582	0.00701159	0	60.272	90.0087	63.4553	81.561	65.6907	74.1151	21.518	32.1345	22.6545	29.1185	23.4526	26.4602
IFT74	2772	0.375496	-0.569314	0.220304	0.432744	0	0.499886	0.933538	0.660105	0.697103	0.505164	0.508698	0.180334	0.336774	0.238133	0.25148	0.182238	0.183513
KIAA0141	4958	0.375447	4.47609	0.000808772	0.00968416	0	19.0671	26.4891	21.0595	24.2437	17.9333	24.5502	3.84572	5.34271	4.24758	4.88981	3.61705	4.95163
MIEN1	754	0.375357	5.7524	0.00143124	0.0146678	0	42.0261	66.4174	46.2074	61.287	52.4982	54.7846	55.7376	88.0867	61.283	81.2824	69.6262	72.6586
AMIGO3	2972	0.375328	4.87845	0.00104433	0.0116593	0	23.9053	35.4745	27.98	34.0612	24.889	29.9689	8.04349	11.9362	9.41452	11.4607	8.37451	10.0838
CHRM4	1817	0.375252	-1.06127	0.237024	0.45074	0	0.339208	0.564013	0.447168	0.503463	0.369158	0.420229	0.186686	0.310409	0.246102	0.277085	0.203169	0.231276
CCDC33	3843	0.375216	0.729191	0.11922	0.293805	0	1.7496	1.88653	1.40539	1.39421	1.06862	2.23385	0.45527	0.490899	0.3657	0.362791	0.278068	0.581277
MCRS1	1995	0.374962	6.15444	0.000280887	0.00462959	0	60.8968	87.2469	62.2841	78.6371	62.8152	75.2873	30.5247	43.7328	31.2201	39.4171	31.4863	37.738
SPAG1	4031	0.374919	4.11798	0.00264893	0.0231258	0	15.6393	18.943	13.7557	17.5825	15.8544	22.2279	3.87975	4.69934	3.41249	4.36182	3.93311	5.51424
UBR3	7953	0.37483	6.49599	0.00268033	0.0232565	0	83.963	82.6376	75.1668	109.348	76.5517	113.705	10.5574	10.3907	9.45138	13.7493	9.62552	14.2971
PIK3R1	7661	0.37444	7.40591	0.000146977	0.00294479	0	155	183.732	144.776	186.978	143.233	203.634	20.2324	23.9828	18.8978	24.4065	18.6964	26.5806
RTEL1	5197	0.374398	1.37877	0.0299547	0.119969	0	2.26734	3.18959	2.23584	2.53668	2.19552	2.96372	0.436279	0.613737	0.430218	0.488105	0.422459	0.570275
PITPNA	3641	0.373898	6.7546	0.000150534	0.00299624	0	95.014	118.443	95.2681	129.952	91.8232	117.155	26.0956	32.5303	26.1654	35.6912	25.2192	32.1767
C3orf70	5901	0.373862	-0.302304	0.223579	0.436467	0	0.714123	0.875192	0.511049	1.16184	0.777175	0.552933	0.121017	0.148313	0.0866039	0.196888	0.131702	0.0937015
GBA	5362	0.373687	3.33247	0.00192399	0.0182369	0	9.05151	11.9026	8.41102	11.1149	8.76265	10.9702	1.68808	2.21981	1.56863	2.07291	1.63421	2.04591
PPAP2C	1532	0.373284	-1.7349	0.402113	0.614178	0	0.178531	0.369526	0.212937	0.367915	0.291441	0.132704	0.116534	0.241205	0.138993	0.240154	0.190235	0.0866213
ACYP2	1222	0.373224	1.45575	0.0556915	0.178229	0	1.7496	3.26738	2.51266	3.04014	2.83669	2.85313	1.43175	2.6738	2.05619	2.48784	2.32135	2.33481
FAM27B	703	0.372968	1.58942	0.0546151	0.176049	0	2.58869	3.53967	2.44878	4.04707	2.72011	2.4329	3.68235	5.03509	3.48333	5.75686	3.86929	3.46074
PMEL	2202	0.372605	-0.234473	0.197687	0.403446	0	0.8748	0.816846	0.596224	0.716467	0.641169	1.23857	0.397275	0.370956	0.270765	0.325371	0.291176	0.562474
MME	6032	0.372494	2.89095	0.0125455	0.0674813	0	7.46258	7.21547	5.70672	8.98488	6.10082	8.80269	1.23717	1.1962	0.946074	1.48954	1.01141	1.45933
MRPL27	703	0.37241	4.46039	0.000427763	0.00621817	0	18.4601	24.5832	18.9514	24.9214	20.0705	24.9041	26.259	34.969	26.9579	35.4501	28.5499	35.4254
PPDPF	777	0.37239	6.57493	0.020856	0.0951869	0	74.2509	134.546	88.3051	106.231	86.6939	81.7234	95.561	173.161	113.649	136.719	111.575	105.178
CDK19	6448	0.372318	5.65629	0.000411556	0.00602885	0	45.1326	51.8697	42.5449	61.0352	44.1047	57.704	6.99947	8.04431	6.59815	9.46576	6.84006	8.94914
ITIH4	3283	0.372255	3.55715	0.00187341	0.0179485	0	10.6761	12.3499	9.62476	13.6322	10.3753	13.757	3.25194	3.76178	2.9317	4.15237	3.16031	4.19036
GUSBP2	1200	0.372046	2.16579	0.0178611	0.0857772	0	4.28474	4.43431	3.83287	4.9959	3.51672	5.66203	3.57061	3.69526	3.19406	4.16325	2.9306	4.71836
SOGA3	11818	0.371818	2.50533	0.0265435	0.110735	0	5.8201	5.48454	4.19486	7.49386	4.70191	6.10437	0.492478	0.464083	0.354955	0.634105	0.39786	0.516532
LOC284023	2525	0.371816	3.36616	0.00309188	0.0256899	0	8.90868	12.525	9.64606	11.4247	8.3352	10.8154	3.52819	4.96039	3.82022	4.52465	3.30107	4.28331
KIF6	4236	0.371472	0.178224	0.162082	0.357255	0	1.1426	0.952987	0.723987	1.58785	0.971469	1.1501	0.269735	0.224973	0.170913	0.374845	0.229336	0.271506
RASD2	2972	0.371462	3.29836	0.00550508	0.0381976	0	8.37309	12.6806	8.09161	10.4953	9.17067	9.9749	2.81732	4.26668	2.72262	3.53138	3.08569	3.35629
SNORD14B	91	0.371378	0.812859	0.138025	0.324486	0	1.42825	1.94487	1.06469	2.38177	1.9818	1.45974	15.695	21.3722	11.6998	26.1733	21.778	16.0411
ERC1	9623	0.371222	6.17007	0.000159608	0.00311544	0	61.4324	78.7867	64.5626	83.4587	62.31	81.3032	6.38391	8.18734	6.70919	8.67284	6.47511	8.44884
SLF2	8016	0.371082	6.74214	0.00517843	0.0368079	0	95.3354	93.2371	91.0094	139.653	93.6302	129.254	11.8931	11.6314	11.3535	17.4218	11.6804	16.1244
VAV2	4851	0.371039	5.17791	0.00187614	0.0179633	0	29.3683	40.8229	34.2403	45.912	31.0481	35.5867	6.05407	8.41535	7.0584	9.46443	6.40036	7.33596
GPS2	1157	0.370709	5.97797	0.000601417	0.00788716	0	49.8101	74.0996	57.2588	73.4282	57.8024	65.5778	43.051	64.0446	49.489	63.4643	49.9589	56.6792
ARPC4-TTLL3	3987	0.370662	-1.45651	0.484456	0.682673	0	0.23209	0.0972436	0.255525	0.309823	0.369158	0.729871	0.0582117	0.0243902	0.0640895	0.0777084	0.0925905	0.183063
LMO4	5405	0.370516	5.4944	0.000441205	0.00635296	0	36.7595	49.5164	38.9888	53.8318	42.1423	49.0341	6.80101	9.16123	7.21347	9.95964	7.79691	9.07198
MMEL1	5804	0.370494	-1.15465	0.300342	0.51911	0	0.303502	0.622359	0.404581	0.464735	0.369158	0.287525	0.0522919	0.107229	0.0697072	0.0800715	0.0636041	0.0495391
MEF2B	1451	0.370485	-0.702419	0.283194	0.501055	0	0.428474	0.875192	0.681399	0.658375	0.408017	0.398111	0.295295	0.603165	0.469607	0.453739	0.281197	0.27437
PIM1	2709	0.370119	4.87696	0.00372244	0.0292925	0	24.8693	39.7532	26.4894	28.6974	25.4719	30.8094	9.18026	14.6745	9.77829	10.5934	9.4027	11.373
FAM83H	11194	0.369645	5.8502	0.00238738	0.0214045	0	49.8993	70.4432	51.0411	71.4724	49.9918	53.0152	4.45768	6.29295	4.55968	6.38488	4.46594	4.73603
ENC1	5728	0.369236	-0.31712	0.159604	0.354009	0	0.624857	0.894641	0.574931	0.910106	0.796604	0.774106	0.109088	0.156187	0.100372	0.158887	0.139072	0.135144
MSRB2	1811	0.369202	3.66297	0.00135053	0.0140305	0	10.444	13.9058	11.4134	14.6585	11.2302	14.1551	5.767	7.67854	6.30228	8.09416	6.20109	7.81616
DNM1P46	3831	0.36897	2.64063	0.0194841	0.0909479	0	5.30236	7.07933	6.26035	5.9641	4.70191	7.96223	1.38407	1.84791	1.63413	1.5568	1.22733	2.07837
HYAL1	2950	0.368943	0.178383	0.182267	0.38439	0	1.16045	1.34196	1.0008	0.852015	0.699458	1.52609	0.393373	0.454902	0.339256	0.288818	0.237104	0.51732
KRTAP5-7	898	0.36877	-0.458199	0.18051	0.382349	0	0.624857	0.7585	0.660105	0.658375	0.524593	0.928927	0.695832	0.844655	0.735084	0.733157	0.584179	1.03444
HCG25	4919	0.368331	1.21794	0.0398149	0.143795	0	1.7496	2.64503	1.98032	2.59477	2.27324	2.49925	0.355682	0.537716	0.402585	0.5275	0.462134	0.508082
CAPN3	3662	0.368151	0.384026	0.114102	0.285731	0	1.03548	1.12803	1.08598	1.43293	1.20462	1.74727	0.282763	0.308035	0.296554	0.391298	0.328952	0.477135
POP5	801	0.368001	4.70624	0.000723381	0.00892293	0	21.0309	30.0288	22.401	28.7555	24.8696	29.3497	26.2558	37.4892	27.9663	35.8995	31.0482	36.6413
IZUMO4	1015	0.367674	2.7679	0.00798949	0.0495159	0	5.58801	7.46831	5.57896	7.16467	6.58656	8.29399	5.50543	7.35794	5.49651	7.05879	6.48922	8.17142
OGFRP1	1242	0.367441	-0.668132	0.274756	0.49164	0	0.339208	0.564013	0.787868	0.755195	0.446876	0.685636	0.273115	0.454117	0.634354	0.608047	0.359803	0.552042
UFSP1	996	0.367388	1.05865	0.0611627	0.189768	0	1.57107	2.74227	1.87385	2.16876	1.92351	1.99056	1.57738	2.75328	1.88137	2.17747	1.93123	1.99855
SIAE	3278	0.367218	2.53466	0.0132169	0.0699445	0	5.12383	5.83461	4.87626	6.06092	5.0905	7.60835	1.5631	1.77993	1.48757	1.84897	1.55293	2.32103
BCL7A	3783	0.367138	8.11196	0.00035642	0.00547535	0	237.606	342.375	251.713	306.822	235.542	285.667	62.809	90.5036	66.538	81.1055	62.2634	75.5134
HIST1H4H	374	0.366971	8.67339	0.00278388	0.0238709	0	299.217	515.333	378.539	446.998	392.085	417.265	800.047	1377.89	1012.14	1195.18	1048.36	1115.68
PKNOX1	5352	0.366878	4.8749	0.000450744	0.00645314	0	26.0655	31.3708	25.084	35.2231	25.6468	32.4461	4.87023	5.86151	4.68685	6.58129	4.792	6.06242
LINC01569	2093	0.366838	3.63359	0.00213024	0.0198199	0	9.97987	14.2948	11.7754	14.097	10.7056	13.4252	4.76821	6.82982	5.6261	6.73529	5.11495	6.41433
SMDT1	6284	0.366662	4.42267	0.00132418	0.0137946	0	18.3172	26.3336	19.8245	24.205	17.9916	21.7855	2.9149	4.19057	3.15475	3.85184	2.86308	3.46683
MAPK8	5923	0.366564	6.18902	0.000313366	0.00498587	0	63.2177	77.7754	62.4332	80.0119	65.477	88.6683	10.6733	13.1311	10.5408	13.5087	11.0547	14.9702
ENY2	2976	0.366303	5.35982	0.000351126	0.0054171	0	35.9561	47.2993	36.3697	43.0074	35.2255	48.3484	12.082	15.8936	12.221	14.4514	11.8365	16.2461
RER1	3104	0.36612	6.52911	0.000637557	0.00823514	0	77.4466	104.615	77.1259	112.563	87.4322	94.7063	24.9506	33.7032	24.8473	36.2638	28.1676	30.511
HYAL3	1987	0.366087	2.13535	0.0446182	0.154901	0	3.12429	5.25115	3.36441	5.07336	4.93506	4.37923	1.57236	2.64275	1.69321	2.55328	2.48367	2.20394
PI4KA	6752	0.365562	7.42702	0.000272881	0.00453216	0	156.464	190.967	155.465	205.994	139.192	184.237	23.173	28.283	23.0251	30.5086	20.6149	27.2863
HPCA	1406	0.365446	-1.81537	0.380447	0.594992	0	0.196384	0.388974	0.212937	0.19364	0.233153	0.24329	0.139675	0.276653	0.151449	0.137724	0.165827	0.173037
RNU6-10P	107	0.364875	0.648721	0.159681	0.354023	0	1.4818	1.12803	1.49056	1.82021	1.04919	2.25596	13.8486	10.5423	13.9305	17.0113	9.80548	21.0838
AP2A2	13408	0.364745	6.63569	0.000574505	0.00763157	0	84.8913	109.671	88.6884	124.762	87.1407	101.231	6.33139	8.17954	6.61459	9.30504	6.49916	7.55004
PTAFR	4533	0.364401	-0.633892	0.196695	0.402342	0	0.589151	0.583461	0.489756	0.716467	0.505164	0.751988	0.129969	0.128714	0.108042	0.158056	0.111441	0.165892
EFR3A	5414	0.364362	5.94328	0.00349064	0.0280343	0	57.0048	56.8097	49.3376	73.525	54.9463	77.3884	10.5292	10.4931	9.11296	13.5805	10.1489	14.2941
ERAP1	7592	0.36383	7.03144	0.000281569	0.00463202	0	118.437	134.079	112.665	153.556	112.03	153.959	15.6003	17.6606	14.84	20.2261	14.7563	20.279
ACSBG2	2789	0.363547	-1.93751	0.382235	0.596266	0	0.23209	0.213936	0.191644	0.232368	0.155435	0.309642	0.0832162	0.076707	0.0687141	0.0833157	0.0557314	0.111023
NOTCH3	8071	0.363248	8.38903	0.000800826	0.00961181	0	293.683	423.068	289.147	379.34	296.842	329.083	36.3874	52.4183	35.8255	47.0004	36.7788	40.7735
GDPGP1	1351	0.362902	2.56879	0.00822763	0.0505779	0	4.98101	6.63201	5.51507	7.04848	4.99335	6.21496	3.6869	4.90896	4.08222	5.21723	3.69604	4.60027
PTOV1-AS1	2148	0.362867	-0.633376	0.287669	0.505724	0	0.589151	0.369526	0.553637	0.910106	0.446876	0.774106	0.274279	0.172032	0.257745	0.423699	0.208043	0.360384
SNORD28	75	0.362825	1.11515	0.0802883	0.228124	0	1.94598	2.21715	1.57574	1.97512	2.05951	3.03007	25.9465	29.562	21.0098	26.335	27.4602	40.4009
TEAD1	9416	0.362487	5.44173	0.00282562	0.0240889	0	39.4196	40.6867	35.9012	55.1873	38.6645	50.715	4.18645	4.32102	3.81279	5.86101	4.10625	5.38604
LIPT2	960	0.362314	3.03759	0.0113174	0.0629557	0	6.58778	10.8329	7.68703	8.22969	7.2083	8.51516	6.86227	11.2843	8.00733	8.57259	7.50864	8.86996
ARMC5	5044	0.362236	4.7888	0.00682429	0.0442498	0	24.2088	36.6219	26.7875	30.324	21.5083	26.1648	4.79952	7.26049	5.31077	6.01189	4.26414	5.18731
WAC-AS1	5376	0.36223	4.4774	0.00069515	0.00871628	0	20.531	24.661	19.5689	24.5341	18.283	25.8772	3.81902	4.58723	3.64005	4.56364	3.40086	4.81348
CCDC88B	4920	0.362063	3.79013	0.00432399	0.0324556	0	11.7295	16.1035	13.0531	17.0403	11.4633	13.381	2.38404	3.27308	2.65306	3.46347	2.32995	2.71971
TSC22D2	4998	0.362048	5.9834	0.000245502	0.00420027	0	56.4514	71.3573	55.5553	74.0865	54.0137	67.9222	11.2948	14.2772	11.1155	14.8232	10.8071	13.5899
GLYCTK	3800	0.36201	4.27478	0.0051776	0.0368079	0	17.1925	24.3303	18.9301	21.5715	14.6303	19.2642	4.52434	6.40272	4.98161	5.6767	3.85008	5.06952
THG1L	1305	0.361946	3.29072	0.00391637	0.03048	0	8.39094	11.1247	7.8148	11.3279	9.38439	10.4394	6.42984	8.52465	5.98835	8.6804	7.1911	7.99951
MIR548AR	57	0.361665	-0.666307	0.362746	0.5799	0	0.803388	0.661256	0.191644	0.503463	0.524593	0.840457	14.0945	11.601	3.36217	8.83269	9.20339	14.7449
PRKRA	2172	0.361039	5.6251	0.000348049	0.00538499	0	44.6505	52.92	40.8839	55.8844	43.9881	57.5935	20.5573	24.3646	18.8232	25.7295	20.2524	26.5163
C1QTNF9B	1402	0.360943	1.73578	0.0642228	0.196203	0	2.74937	3.18959	3.70511	3.8147	2.23438	4.13594	1.96104	2.27503	2.64273	2.7209	1.59371	2.95003
NTN1	5954	0.36094	2.71174	0.0105803	0.0599329	0	5.76654	7.46831	5.40861	8.13287	5.92596	6.34767	0.968515	1.25433	0.908399	1.36595	0.99529	1.06612
RUNDC3A-AS1	5081	0.36048	2.67314	0.0139284	0.0723998	0	5.35592	7.37106	6.47329	7.39704	4.85734	6.61307	1.05411	1.45071	1.27402	1.45582	0.955982	1.30153
ZNF347	4563	0.360456	4.14279	0.00147832	0.0150282	0	16.0321	18.7097	16.1832	20.1773	14.1057	20.5912	3.51349	4.1003	3.54662	4.42193	3.09133	4.51265
ING3	3025	0.36015	4.78591	0.00383904	0.0300166	0	25.1193	32.8294	21.6557	26.1414	25.5885	33.9943	8.30389	10.8527	7.15891	8.64177	8.459	11.2378
EXOC3-AS1	1325	0.360126	2.18295	0.0125229	0.0673835	0	3.82056	5.32895	4.23745	5.01527	3.78873	4.84369	2.88344	4.02185	3.19808	3.78511	2.85942	3.65561
STON2	13046	0.360122	5.47591	0.00306277	0.0255884	0	38.3484	41.8536	40.3729	57.8983	38.1399	50.2284	2.93947	3.20816	3.09466	4.43801	2.92349	3.8501
MIR2276	89	0.360016	-1.31131	0.376362	0.591426	0	0.23209	0.311179	0.319406	0.639011	0.408017	0.265408	2.60775	3.4964	3.58883	7.1799	4.58446	2.98211
CRIPAK	4443	0.359713	3.78069	0.00282217	0.0240889	0	12.7471	14.4115	12.4142	16.5756	10.861	15.2388	2.86903	3.24364	2.79411	3.73071	2.44452	3.42985
SLC39A2	1418	0.359597	-1.39719	0.455424	0.658375	0	0.410621	0.330628	0.404581	0.542191	0.0777175	0.265408	0.289577	0.233165	0.285318	0.382363	0.0548078	0.18717
ID1	1232	0.359581	4.35426	0.00319643	0.0261993	0	17.1747	26.5669	17.8016	21.9006	18.6911	20.3479	13.9405	21.5641	14.4493	17.7765	15.1713	16.5162
JUND	1963	0.359547	6.96013	0.0077758	0.0484891	0	101.495	168.873	116.604	140.64	109.077	110.122	51.7039	86.0281	59.4011	71.6457	55.5662	56.0988
DSE	4182	0.359297	3.2255	0.0137999	0.0719788	0	7.3019	8.55743	8.43231	10.9794	8.78208	11.9212	1.74603	2.04625	2.01634	2.62539	2.09997	2.8506
MIR6079	62	0.359227	-1.39499	0.317291	0.536115	0	0.214237	0.44732	0.3407	0.329187	0.349729	0.375994	3.45543	7.21485	5.49515	5.30947	5.64079	6.06442
SOAT1	7026	0.359196	6.50641	0.00101354	0.0114429	0	79.6604	88.9973	77.4453	113.221	81.7588	104.195	11.3379	12.6669	11.0227	16.1146	11.6366	14.8299
HHLA3	951	0.359113	2.32146	0.0154676	0.077753	0	4.24903	5.15391	4.36521	6.40947	4.4299	5.15333	4.46796	5.41946	4.59013	6.73972	4.65815	5.41885
DUSP5P1	2472	0.358992	2.36816	0.014139	0.0731684	0	4.96315	5.69847	4.59944	5.9641	3.9053	5.61779	2.00775	2.30521	1.86062	2.41266	1.57982	2.27257
LOC103344931	4237	0.358535	4.57382	0.00135481	0.0140557	0	20.1026	28.4535	20.7827	27.9616	21.6443	23.7097	4.74453	6.71548	4.90504	6.59938	5.10841	5.59588
PPP3CB	4645	0.35843	6.13764	0.000416755	0.00608736	0	61.1468	75.3443	61.2195	75.8874	62.6597	86.0142	13.164	16.2205	13.1796	16.3374	13.4897	18.5176
CDC5L	6432	0.358154	6.8174	0.000243286	0.00417951	0	98.299	120.096	98.2492	123.91	99.9253	136.044	15.2828	18.6716	15.2751	19.2646	15.5356	21.151
ARPP21	6873	0.357907	8.3866	0.000158588	0.00310353	0	289.702	373.921	309.078	377.868	281.26	376.016	42.1507	54.4043	44.9699	54.9787	40.9224	54.7092
CTSK	1810	0.357827	2.02499	0.0303656	0.120975	0	4.17762	4.23982	3.19406	5.09272	3.20585	4.24652	2.30808	2.34244	1.76467	2.81366	1.77119	2.34614
SNORD31	68	0.357406	2.02012	0.017468	0.0844249	0	3.62417	4.84273	3.70511	4.5118	3.24471	4.18017	53.2967	71.2166	54.4869	66.3501	47.7163	61.4731
CAPS	2147	0.35738	3.53358	0.00481929	0.0351059	0	10.1941	14.4115	10.2423	13.2643	9.92841	11.1914	4.74807	6.71239	4.77051	6.17807	4.62432	5.21255
KCNMB3	3495	0.357211	-1.57037	0.459131	0.661385	0	0.196384	0.466769	0.319406	0.426007	0.272011	0.0884692	0.0561899	0.133553	0.0913894	0.12189	0.0778287	0.0253131
ANGPTL4	1905	0.357049	0.507354	0.120377	0.295805	0	1.30327	1.61424	1.44797	1.62657	0.893751	1.41551	0.684133	0.847372	0.760091	0.853844	0.469161	0.743048
LOC100287944	569	0.357005	-1.54278	0.456552	0.659111	0	0.196384	0.311179	0.212937	0.561555	0.388588	0.132704	0.345138	0.546888	0.374231	0.986916	0.682931	0.233223
PDE3B	6090	0.356555	7.54634	0.00024842	0.0042307	0	167.408	194.662	165.367	221.93	158.971	213.034	27.489	31.9642	27.1539	36.4418	26.1036	34.9809
ZNF461	3208	0.356268	1.85457	0.0517914	0.170717	0	3.51705	3.0729	2.95983	4.22134	2.93384	4.79945	1.09634	0.957886	0.92264	1.31588	0.914537	1.49609
AACS	3321	0.35609	5.28365	0.000383687	0.00576558	0	35.2777	45.0627	34.2616	43.9949	32.8745	42.0229	10.6226	13.569	10.3167	13.2475	9.89898	12.6537
PPIP5K1	5927	0.35599	4.95345	0.000374578	0.00567941	0	26.8332	34.4631	26.6384	34.7777	27.9783	35.0117	4.52728	5.8146	4.49442	5.86767	4.72048	5.90715
RPS6KA2	6053	0.355863	4.52936	0.00161325	0.0160733	0	21.0309	24.3498	18.0784	27.4194	21.5472	25.8994	3.47446	4.02276	2.98668	4.52988	3.55975	4.27876
TCF25	2259	0.355787	6.46122	0.000236023	0.00409981	0	78.8749	102.456	78.4035	99.3565	74.5311	94.8169	34.9158	45.3545	34.7072	43.9825	32.993	41.9729
P2RY10	1790	0.355671	-0.612417	0.252025	0.46725	0	0.714123	0.60291	0.404581	0.619647	0.485734	0.862575	0.398951	0.336821	0.226023	0.346171	0.27136	0.481885
PIGZ	2739	0.355601	3.41307	0.00900104	0.0536555	0	8.98009	12.3888	10.7746	12.7028	8.21863	10.6384	3.2786	4.52312	3.93378	4.63774	3.00059	3.88405
UBXN8	1448	0.355554	2.26909	0.016995	0.0829864	0	4.57039	4.88163	4.02451	5.98347	3.98302	5.2418	3.15634	3.37129	2.77936	4.13223	2.75071	3.62003
LOC100129534	2247	0.355536	0.632263	0.136552	0.322225	0	1.10689	1.45865	1.40539	2.24622	1.47663	1.37127	0.492608	0.649156	0.62545	0.999653	0.657157	0.610268
EXTL3-AS1	780	0.355416	0.884058	0.0792102	0.226206	0	1.7496	2.02267	1.78867	2.01385	1.22405	2.05691	2.24308	2.59316	2.29317	2.58186	1.5693	2.63706
SDCBP2-AS1	2694	0.355144	2.9925	0.0074755	0.0472191	0	7.3019	8.36295	6.36682	9.85626	7.16944	8.44881	2.71043	3.10429	2.36333	3.6586	2.66126	3.13616
FRMD5	5790	0.354688	1.8027	0.0323476	0.126346	0	3.28496	3.26738	2.95983	4.33753	2.83669	4.02535	0.567351	0.564315	0.511196	0.749141	0.489929	0.695224
ZNF33B	8465	0.354502	5.24324	0.00904351	0.0538663	0	37.5986	34.0158	32.1535	46.4154	29.8629	47.0214	4.44165	4.01841	3.79841	5.48322	3.52781	5.5548
SRGAP2	8652	0.354384	5.89629	0.00113002	0.0122963	0	51.9346	59.338	50.9985	74.4932	53.8194	66.5731	6.00261	6.8583	5.89441	8.60994	6.22045	7.69453
ANKDD1B	2552	0.354342	-0.0215492	0.210119	0.419987	0	0.892653	0.700154	0.638812	1.21993	0.952039	1.2828	0.349786	0.274355	0.250318	0.478029	0.373056	0.502666
CASC10	1989	0.353853	-1.57996	0.423889	0.634263	0	0.196384	0.233385	0.361993	0.232368	0.233153	0.552933	0.0987349	0.117338	0.181998	0.116826	0.117221	0.277995
DGCR2	4492	0.353657	6.63396	0.00083106	0.00989627	0	82.8204	121.613	90.4557	113.318	88.2677	99.1961	18.4373	27.0732	20.1371	25.2266	19.65	22.0828
GAS1	2828	0.353653	2.45471	0.0148649	0.0758364	0	4.9453	6.94319	4.7485	5.92537	4.64362	5.44086	1.74869	2.45516	1.6791	2.09525	1.64202	1.92392
SLC41A2	3544	0.353214	0.23475	0.170147	0.368383	0	0.946213	1.18637	0.702693	1.23929	1.34063	1.41551	0.26699	0.334755	0.198277	0.349688	0.378281	0.399409
TADA2A	4032	0.353147	5.40726	0.000715801	0.0088798	0	35.117	49.2247	37.3066	43.9949	39.3056	49.4985	8.70957	12.2085	9.25263	10.9114	9.74842	12.2764
SCAMP2	1291	0.353101	5.56487	0.000529626	0.00720776	0	40.3658	55.9345	41.757	54.2772	42.5115	48.9456	31.2671	43.3265	32.3447	42.0428	32.9291	37.9129
ATG10	2425	0.353053	4.00028	0.000997736	0.0113034	0	14.211	17.7761	13.9474	17.8536	13.9114	18.1141	5.86022	7.33036	5.7515	7.3623	5.73667	7.46972
GBAT2	439	0.352619	0.502035	0.108246	0.277362	0	0.981919	1.61424	1.38409	1.62657	1.28234	1.39339	2.23672	3.67709	3.15283	3.70518	2.92105	3.17401
CITED4	1291	0.352473	0.690089	0.0945696	0.253983	0	1.33898	2.00322	1.61832	1.76212	1.20462	1.52609	1.03717	1.55168	1.25354	1.36493	0.933092	1.1821
NBPF1	5947	0.352164	5.68442	0.000288299	0.00471584	0	44.3113	56.7125	46.4629	59.0988	44.6876	57.0848	7.45104	9.53631	7.81283	9.93759	7.5143	9.59892
VAX2	1146	0.351809	-0.0508221	0.208702	0.418149	0	0.607004	1.36141	0.936924	0.948834	0.913181	0.796223	0.529672	1.18797	0.81756	0.827953	0.796842	0.694784
BTG2	2711	0.351807	4.86072	0.00106821	0.0118536	0	26.5118	35.3189	25.8719	32.028	24.1119	30.2565	9.77935	13.028	9.5433	11.8141	8.89408	11.1606
S1PR3	4388	0.351697	5.37204	0.00125699	0.0132793	0	36.813	44.6542	35.5605	52.244	36.7021	42.2662	8.38948	10.1764	8.10404	11.9061	8.3642	9.63222
CCDC154	2191	0.351692	0.0812055	0.149739	0.340249	0	0.767682	1.01133	0.91563	1.37484	1.01033	1.03951	0.35038	0.461585	0.417905	0.627495	0.461126	0.474447
FBXL3	3549	0.351628	5.68763	0.000458599	0.006505	0	46.7393	55.3121	45.1427	56.3104	43.891	61.663	13.1697	15.5853	12.7198	15.8666	12.3671	17.3748
SLC4A2	5762	0.3511	6.83842	0.00107347	0.0118775	0	94.0321	138.494	103.232	133.669	104.413	112.555	16.3194	24.0358	17.916	23.1984	18.121	19.534
POPDC2	1769	0.35107	-0.316522	0.17135	0.370091	0	0.767682	0.816846	0.660105	0.852015	0.582881	0.906809	0.433964	0.461756	0.373152	0.481636	0.329498	0.512611
PDGFC	3069	0.350936	5.03437	0.00132222	0.0137837	0	28.4935	33.1212	27.5328	36.8496	30.2904	40.165	9.28429	10.7922	8.97126	12.007	9.86979	13.0873
SYNGR2	1694	0.350873	5.06272	0.00236047	0.0212646	0	27.458	40.3561	29.2576	39.5412	31.3396	32.3355	16.209	23.823	17.2713	23.3419	18.5003	19.0882
RAB21	2627	0.350689	5.87709	0.000673489	0.00850821	0	52.7737	60.9328	51.5521	72.0533	50.5747	64.5383	20.0889	23.1948	19.6239	27.428	19.2519	24.5673
UBE2E2	1760	0.350614	5.97981	0.000456555	0.00648729	0	55.5766	72.1936	54.1286	65.6051	56.6366	74.3362	31.5776	41.0191	30.7549	37.2756	32.1799	42.2365
ZNF35	2649	0.350581	0.323322	0.183995	0.386289	0	1.07118	0.991884	0.873043	1.83958	1.24348	1.23857	0.404373	0.374437	0.329574	0.694442	0.469415	0.467561
COL7A1	9169	0.350557	3.85368	0.0075439	0.0475322	0	12.6935	14.5282	12.6911	19.364	12.6485	14.5753	1.3844	1.58449	1.38413	2.1119	1.37949	1.58963
LMLN	7154	0.350487	4.21705	0.0104521	0.0594735	0	17.0497	16.7648	14.863	24.3018	17.0201	21.3653	2.38324	2.34342	2.07758	3.39695	2.37911	2.98648
EXOC6B	2594	0.350487	4.86589	0.00096587	0.011	0	26.4761	30.4178	24.6368	32.1442	25.6856	35.4098	10.2067	11.7262	9.49762	12.3917	9.90194	13.6507
SLC25A13	3193	0.350386	2.4688	0.0105793	0.0599329	0	4.90959	5.71792	4.85497	6.56438	4.74077	6.21496	1.53761	1.79077	1.5205	2.05587	1.48474	1.94643
UNC45A	4047	0.350133	5.86973	0.000693405	0.00870896	0	49.453	67.2926	50.0828	68.8776	54.616	60.2918	12.2197	16.6278	12.3753	17.0194	13.4954	14.8979
THAP8	1825	0.350012	3.44947	0.00863864	0.0522562	0	8.90868	13.7891	10.1358	12.4317	9.69526	10.3509	4.88147	7.55569	5.55387	6.81187	5.31247	5.67172
TOP1P1	2429	0.349819	-0.501259	0.300866	0.519553	0	0.678417	0.427872	0.468462	1.08438	0.602311	0.729871	0.279299	0.176151	0.192862	0.446432	0.247967	0.300482
NHS	9131	0.349811	-0.92919	0.276435	0.493711	0	0.410621	0.719602	0.383287	0.445371	0.485734	0.464463	0.0449699	0.0788087	0.0419765	0.0487757	0.0531962	0.0508666
FBXO10	4575	0.349515	2.61935	0.00890993	0.0533339	0	5.10598	6.47642	5.64284	7.16467	5.38194	6.9006	1.11606	1.41561	1.23341	1.56605	1.17638	1.50833
MYH7B	6584	0.349381	0.391055	0.162564	0.358022	0	0.92836	1.08913	1.38409	1.78148	1.06862	1.41551	0.141002	0.16542	0.210221	0.270578	0.162305	0.214992
DTNBP1	2558	0.349079	4.90481	0.000791066	0.00952486	0	24.423	32.5571	27.8096	33.4803	26.7542	34.5472	9.54769	12.7276	10.8716	13.0885	10.4591	13.5056
HELZ2	10129	0.349034	5.05638	0.0019807	0.0187043	0	28.7613	40.2783	27.7457	38.8054	31.2036	32.6009	2.8395	3.97653	2.73924	3.83112	3.08062	3.21857
ARL15	2486	0.348485	3.35612	0.00570964	0.0392394	0	9.42642	10.4829	8.56008	11.0181	8.93751	12.828	3.7918	4.21676	3.44331	4.43206	3.59514	5.16011
ELMOD2	4409	0.347963	6.28709	0.00320434	0.0262344	0	73.3226	76.4529	62.1777	85.4532	70.5286	100.435	16.6302	17.3402	14.1024	19.3815	15.9965	22.7795
MAP3K6	4348	0.34796	1.68644	0.0368304	0.137002	0	2.94576	3.81195	3.10888	3.42742	2.35095	3.4503	0.677497	0.876713	0.715015	0.788276	0.540698	0.793537
SNORD79	81	0.347697	0.129104	0.205031	0.413155	0	1.07118	0.7585	0.830455	1.51039	0.874322	1.2828	13.2245	9.3642	10.2525	18.6468	10.7941	15.8371
SLC25A2	1435	0.347395	-0.562252	0.329913	0.547378	0	0.374914	0.952987	0.702693	0.793923	0.62174	0.375994	0.261264	0.664102	0.489681	0.553256	0.433268	0.262017
SLC26A4	4928	0.347331	0.611757	0.0862515	0.238987	0	1.37469	1.69204	1.25633	1.49103	1.30177	1.83574	0.278954	0.343352	0.254937	0.302562	0.264157	0.372511
CHAC1	1560	0.347172	3.01687	0.0735143	0.214737	0	6.87343	9.0631	5.17437	10.7664	9.19009	7.18812	4.40605	5.80968	3.31691	6.90152	5.89109	4.60777
MEX3D	2850	0.347083	5.51146	0.00704954	0.0452838	0	35.6526	55.4677	38.9249	55.0518	45.8145	42.5316	12.5097	19.4624	13.6579	19.3164	16.0753	14.9234
C14orf80	2048	0.346875	4.95651	0.00246385	0.0218629	0	24.4409	37.7305	28.0651	35.0488	29.4355	31.3623	11.934	18.4231	13.7037	17.1137	14.3728	15.3136
MAPK8IP1	3205	0.346862	1.31391	0.0638927	0.195591	0	2.07096	3.32573	2.3849	2.49795	2.02066	2.38867	0.646164	1.03767	0.744118	0.779392	0.63047	0.745294
MIR4753	83	0.34615	-1.93796	0.432034	0.640566	0	0.142825	0.252833	0.234231	0.329187	0.213723	0.154821	1.72078	3.04618	2.82206	3.96611	2.57498	1.86531
CLTCL1	5514	0.345916	4.34844	0.00145737	0.0148652	0	18.8171	22.6383	16.311	22.3073	18.5745	23.3559	3.41261	4.1056	2.95811	4.04557	3.3686	4.23574
TSACC	1199	0.345795	-1.21958	0.298488	0.517183	0	0.303502	0.486218	0.319406	0.464735	0.408017	0.353877	0.253129	0.405519	0.266394	0.387602	0.340298	0.295143
IPO5P1	5510	0.345734	5.60518	0.000579648	0.00767692	0	44.2935	51.403	43.3114	57.5884	40.9183	54.3422	8.03874	9.32903	7.86051	10.4516	7.42618	9.86247
TMEM64	4819	0.345629	3.87231	0.00337116	0.0272772	0	13.6755	15.4034	12.5207	15.5299	12.3959	18.1583	2.83782	3.19639	2.5982	3.22264	2.57231	3.76806
PCBP3	1989	0.345501	3.57989	0.0051528	0.0367119	0	9.47998	13.7697	11.5838	13.9227	10.4724	12.3193	4.7662	6.92292	5.82392	6.99985	5.26518	6.19373
LCAT	1354	0.345358	2.25462	0.0380898	0.140002	0	4.17762	6.20414	4.47168	5.51873	3.86645	4.13594	3.08539	4.58208	3.30257	4.07587	2.85557	3.05461
NAA40	3885	0.345173	6.20871	0.00044123	0.00635296	0	66.0564	79.9342	66.6068	87.893	62.718	80.3522	17.0029	20.5751	17.1446	22.6237	16.1436	20.6827
C17orf107	3082	0.345118	-0.40755	0.250925	0.466122	0	0.482033	0.60291	0.638812	1.04565	0.777175	0.751988	0.156403	0.195623	0.207272	0.339278	0.252166	0.243994
MSANTD2	2382	0.345075	3.21994	0.0051927	0.0368641	0	8.19456	9.51042	7.89997	11.1924	8.43235	10.4615	3.4402	3.99262	3.31653	4.69873	3.54003	4.39189
DBNL	2218	0.345071	6.44464	0.0023789	0.0213847	0	69.5734	107.299	82.5345	100.034	78.0478	84.9083	31.3676	48.3763	37.2112	45.1011	35.1884	38.2815
SNHG12	739	0.344875	3.52476	0.00232824	0.0210417	0	10.2298	12.6611	10.0506	13.2256	10.045	12.629	13.8428	17.1328	13.6003	17.8966	13.5927	17.0893
TAF4B	4449	0.344652	3.89968	0.00234014	0.0211366	0	12.8006	16.0063	12.3504	17.2146	14.2029	16.7649	2.8772	3.59773	2.77599	3.86931	3.19237	3.76824
POLR3H	4581	0.344623	5.52922	0.00252584	0.0222825	0	39.6517	54.9621	39.6063	56.02	42.7252	43.8586	8.65568	11.9978	8.64578	12.2288	9.32661	9.57402
NR6A1	7064	0.344382	3.32665	0.0471939	0.160965	0	7.28405	9.19924	8.75172	14.31	10.4141	10.0191	1.03115	1.30227	1.23892	2.02576	1.47426	1.41834
SEMA6A-AS1	967	0.34434	-0.560403	0.228585	0.4418	0	0.571298	0.564013	0.638812	0.774559	0.485734	0.81834	0.590794	0.58326	0.660612	0.800991	0.502311	0.846267
ZDHHC16	2079	0.344273	5.37255	0.00109543	0.0120497	0	34.5814	45.6267	35.2411	49.5137	39.6165	43.7701	16.6337	21.9465	16.951	23.8161	19.0556	21.0535
SNORD36B	71	0.344003	-1.11337	0.329001	0.546638	0	0.517739	0.427872	0.234231	0.445371	0.349729	0.552933	7.2921	6.02636	3.29903	6.27283	4.92576	7.78778
TCTN1	2230	0.343801	3.21001	0.011046	0.0618534	0	8.42665	9.8605	7.21857	11.7152	8.70436	9.3335	3.77877	4.42175	3.23703	5.25345	3.9033	4.18543
INCA1	1553	0.343419	-0.613788	0.278534	0.496757	0	0.731976	0.583461	0.511049	0.832651	0.369158	0.641402	0.47133	0.3757	0.329072	0.536156	0.237706	0.413008
APOM	6370	0.343376	1.81497	0.0336365	0.12928	0	3.01717	4.5121	3.02371	3.40806	3.16699	3.75994	0.473653	0.708336	0.47468	0.535017	0.497172	0.590258
PYGO1	8396	0.343299	-0.517374	0.29698	0.515867	0	0.660564	0.564013	0.723987	0.658375	0.369158	1.0174	0.078676	0.0671764	0.0862299	0.0784153	0.0439683	0.121176
FAM83H-AS1	5474	0.343102	-1.2998	0.313626	0.532626	0	0.339208	0.505667	0.276818	0.367915	0.349729	0.353877	0.0619672	0.0923761	0.0505697	0.0672114	0.0638891	0.0646468
FANCL	1732	0.343016	4.38571	0.00609043	0.0410008	0	18.9957	19.2153	17.9506	24.5922	18.2442	26.2532	10.9675	11.0943	10.3641	14.1988	10.5336	15.1578
DNASE1L1	3647	0.342705	3.10606	0.00786224	0.0489073	0	7.14123	9.64656	7.30375	10.3404	8.23806	8.75845	1.95811	2.64507	2.00267	2.83531	2.25886	2.40155
TEX9	1782	0.342474	2.75616	0.0259264	0.109313	0	6.4271	6.22359	6.04742	7.49386	5.30422	8.86904	3.60668	3.49247	3.39361	4.20531	2.97655	4.97701
KCTD16	5183	0.342419	-1.21584	0.39129	0.604906	0	0.23209	0.505667	0.553637	0.29046	0.272011	0.530815	0.0447791	0.0975625	0.106818	0.0560408	0.0524814	0.102415
FAM66B	2305	0.342106	0.935379	0.0664053	0.200606	0	1.85672	2.08101	1.59703	2.16876	1.49606	2.03479	0.805518	0.902825	0.692854	0.940896	0.649051	0.882773
MIR597	97	0.342024	-1.41086	0.438012	0.645034	0	0.46418	0.466769	0.298112	0.387279	0.116576	0.265408	4.78536	4.81205	3.07332	3.99257	1.20182	2.73616
MIR4691	85	0.342019	-0.876094	0.247538	0.462497	0	0.482033	0.60291	0.383287	0.580919	0.466305	0.508698	5.67097	7.09306	4.50926	6.83434	5.48594	5.98468
SEC14L2	4857	0.341334	4.72459	0.000703233	0.00876698	0	23.5303	29.1731	23.7425	30.4982	22.6158	28.8631	4.84463	6.0064	4.88831	6.27924	4.65633	5.94257
SNORD26	75	0.341136	1.33579	0.102788	0.268483	0	2.66011	2.37274	1.53315	2.94332	2.35095	3.03007	35.4681	31.6366	20.442	39.2443	31.3461	40.4009
SMARCA1	4108	0.341119	4.90679	0.00224734	0.0206489	0	26.4582	29.6398	25.7441	33.3641	27.104	37.5109	6.44066	7.21515	6.26682	8.12174	6.59785	9.13119
DYRK1B	2570	0.341101	4.68197	0.00311816	0.0257854	0	22.4949	32.1682	23.8064	28.6393	21.5666	25.1031	8.75287	12.5168	9.26318	11.1437	8.39168	9.76776
KIF27	4690	0.340655	4.73646	0.0101315	0.0581957	0	24.3873	23.2996	22.5501	32.6476	23.529	33.3529	5.19985	4.96792	4.80811	6.96112	5.01684	7.11149
MIR320B2	138	0.340618	-1.31227	0.448169	0.653235	0	0.571298	0.369526	0.234231	0.348551	0.136006	0.508698	4.13984	2.67772	1.69733	2.52573	0.985548	3.68622
LOC728392	1493	0.340613	4.1461	0.0029178	0.0247596	0	14.336	21.5492	15.949	18.8992	16.515	18.7776	9.60215	14.4335	10.6825	12.6586	11.0616	12.5771
MORN1	6378	0.340523	3.8933	0.00261076	0.0228585	0	12.5507	16.2202	13.2021	17.9117	13.5034	15.5485	1.96781	2.54315	2.06994	2.80835	2.11719	2.43783
UBTF	5369	0.340379	7.88748	0.00126469	0.0133271	0	194.866	275.763	222.051	284.282	209.993	233.581	36.2947	51.3621	41.358	52.9489	39.1121	43.5055
ORMDL2	1334	0.340173	3.83374	0.00258819	0.0227265	0	11.7116	16.0257	12.4568	16.2076	13.5034	15.4379	8.77932	12.0133	9.33795	12.1497	10.1225	11.5726
RNU6-59P	107	0.339973	-1.68715	0.397792	0.610595	0	0.267796	0.194487	0.234231	0.406643	0.213723	0.309642	2.50277	1.81764	2.18907	3.8004	1.99741	2.89385
C19orf25	2257	0.339947	4.39698	0.00360212	0.0286229	0	18.1923	25.8084	19.0579	24.4954	18.4579	20.1489	8.06038	11.4348	8.4439	10.8531	8.17807	8.92728
FOXO3	7534	0.339868	5.91751	0.000771862	0.00938314	0	53.6842	64.3558	56.0025	72.2663	50.3027	65.8432	7.12559	8.54205	7.4333	9.59203	6.67675	8.73947
APPBP2	6499	0.339641	5.99353	0.00182708	0.0175936	0	58.4688	63.0527	51.616	74.164	58.5407	76.2383	8.99658	9.70191	7.94214	11.4116	9.00765	11.7308
HMGN2	1969	0.339637	8.06897	0.00043292	0.0062571	0	222.985	315.73	251.287	296.211	236.883	287.923	113.248	160.351	127.622	150.437	120.306	146.228
RPL13AP3	1473	0.339587	-0.0279651	0.273308	0.49024	0	0.46418	1.24472	1.21374	1.00693	0.854893	0.906809	0.315125	0.845022	0.823993	0.683589	0.580375	0.615621
ATP2B3	6574	0.33926	-0.64032	0.266092	0.48234	0	0.446327	0.486218	0.574931	0.852015	0.582881	0.685636	0.0678927	0.0739607	0.0874552	0.129604	0.0886646	0.104295
TNRC6C	9780	0.339234	8.19429	0.000321353	0.00509156	0	259.084	340.858	269.323	312.806	247.394	327.778	26.4912	34.8526	27.5381	31.9842	25.2959	33.5152
THY1	4033	0.339093	4.86053	0.00160161	0.0159918	0	24.0124	33.4129	24.7646	33.3448	28.0949	30.4555	5.95397	8.28487	6.14049	8.26798	6.96625	7.55158
PACS2	6863	0.338927	6.18383	0.00130126	0.0135952	0	61.5217	80.7705	69.1833	88.3578	61.8243	74.3141	8.96425	11.769	10.0806	12.8745	9.00835	10.8282
LOC100132077	2162	0.338825	-2.26557	0.477935	0.677328	0	0.196384	0.213936	0.106469	0.213004	0.136006	0.132704	0.0908343	0.0989528	0.0492454	0.0985216	0.0629073	0.0613801
RAPH1	10501	0.338657	1.48028	0.0484749	0.163749	0	2.66011	3.034	2.55525	2.86587	2.07894	3.33971	0.253319	0.288925	0.243334	0.272914	0.197976	0.318038
SARM1	7298	0.338438	3.38778	0.0088339	0.0529929	0	9.85489	12.6417	9.56088	11.9282	8.21863	10.3509	1.35036	1.73221	1.31007	1.63445	1.12615	1.41832
SLC22A14	1977	0.338212	-1.65541	0.456697	0.659194	0	0.249943	0.408423	0.255525	0.116184	0.233153	0.420229	0.126425	0.206587	0.129249	0.0587677	0.117932	0.212559
DFNB59	1524	0.338149	2.59011	0.0223511	0.0993596	0	5.96292	6.068	5.32343	6.64184	4.5659	7.36506	3.91268	3.98163	3.49306	4.35816	2.996	4.83272
GPR155	7599	0.337938	4.53076	0.00538748	0.0376912	0	21.9771	21.977	20.2716	26.6061	18.9048	28.7746	2.89211	2.8921	2.66767	3.50126	2.4878	3.78663
FBXL19-AS1	3951	0.337777	3.75233	0.00553493	0.0383696	0	11.1046	13.6724	12.6698	16.7886	11.8713	14.5532	2.81058	3.4605	3.20672	4.24919	3.00464	3.68342
TMED10P1	4033	0.337687	-1.38445	0.325055	0.542964	0	0.357061	0.427872	0.255525	0.367915	0.291441	0.353877	0.0885349	0.106093	0.0633585	0.0912262	0.072264	0.0877453
GAS6-AS1	895	0.336957	3.17158	0.0200753	0.0927076	0	8.48021	9.64656	9.07113	10.4565	6.25626	9.95279	9.47509	10.7783	10.1353	11.6833	6.99023	11.1204
LOC101927124	1213	0.336783	-1.83276	0.400633	0.612987	0	0.267796	0.311179	0.191644	0.232368	0.174864	0.265408	0.220772	0.256537	0.157991	0.191564	0.144159	0.218803
PHOSPHO1	2173	0.336642	0.829066	0.127748	0.308269	0	1.30327	2.00322	1.3415	2.20749	1.96237	1.59245	0.599758	0.921867	0.617351	1.01587	0.903068	0.732833
LAGE3	949	0.336537	4.29398	0.00804661	0.0496869	0	16.2463	25.4778	18.27	21.5908	17.4281	18.4458	17.1194	26.847	19.2519	22.7511	18.3648	19.4371
NSF	11955	0.33649	5.76591	0.00238817	0.0214045	0	48.3283	54.5342	43.2901	64.2884	52.5565	63.2776	4.04251	4.56162	3.62109	5.37753	4.39619	5.29298
RNU6-36P	107	0.336448	-0.49802	0.227427	0.4405	0	0.446327	0.7585	0.681399	0.735831	0.660599	0.751988	4.17128	7.08878	6.36822	6.87692	6.17382	7.02793
TRIM8	2744	0.336413	6.63804	0.00156252	0.0157051	0	86.266	115.564	86.7719	121.18	90.9878	96.5641	31.4381	42.1153	31.6224	44.1617	33.1588	35.191
SNORD1A	74	0.336356	-0.720968	0.332166	0.549811	0	0.714123	0.486218	0.3407	0.852015	0.427446	0.552933	9.65031	6.57051	4.60405	11.5137	5.7763	7.47206
BTD	3189	0.336038	2.54705	0.0153524	0.0774606	0	4.6418	6.90429	5.55766	6.21583	5.2265	6.32555	1.45557	2.16503	1.74276	1.94915	1.63892	1.98355
RORB-AS1	824	0.335969	-1.43432	0.389349	0.602891	0	0.23209	0.544564	0.319406	0.29046	0.330299	0.265408	0.281662	0.660879	0.387628	0.352499	0.400849	0.322097
TM4SF19-AS1	2061	0.335487	1.04426	0.0863833	0.239117	0	2.21378	2.2366	1.61832	2.32368	1.51549	2.21173	1.07413	1.0852	0.785212	1.12745	0.735318	1.07313
SLC8A2	5111	0.335094	0.959068	0.0720511	0.211832	0	1.55322	2.02267	1.6822	2.3624	1.82636	1.99056	0.303897	0.395748	0.329134	0.46222	0.357339	0.389465
LINC00637	2056	0.335092	-1.17433	0.309007	0.527086	0	0.267796	0.486218	0.404581	0.426007	0.408017	0.442346	0.130251	0.236487	0.196781	0.207202	0.198452	0.215149
PPIL2	4102	0.334901	6.72301	0.000322218	0.00509354	0	91.6219	115.448	94.6932	122.981	93.9022	114.988	22.3359	28.1442	23.0846	29.9806	22.8918	28.0321
PRKCQ	3285	0.33488	6.56968	0.000407594	0.00600225	0	82.4276	102.884	87.1339	103.926	82.4	110.985	25.0921	31.3192	26.5248	31.6367	25.0837	33.7853
STARD7	3383	0.334781	7.44094	0.000308161	0.00493416	0	156.661	195.79	145.5	197.183	158.796	188.395	46.3082	57.8747	43.0092	58.2865	46.9395	55.6888
MIR1914	80	0.334755	-0.378566	0.230782	0.444176	0	0.678417	1.01133	0.511049	0.697103	0.738316	0.729871	8.48021	12.6417	6.38812	8.71379	9.22895	9.12339
ZNF837	2033	0.334607	3.72457	0.0195137	0.0910018	0	10.7475	17.5233	12.5633	14.7941	11.6965	11.7443	5.28655	8.61943	6.17968	7.27697	5.75331	5.77683
CEL	2386	0.33449	2.38855	0.0382252	0.140397	0	4.42756	5.21226	4.17357	6.99039	5.18764	5.17545	1.85564	2.18452	1.74919	2.92975	2.1742	2.16909
PNPLA8	4973	0.334341	5.27644	0.0047443	0.0347714	0	35.0277	37.6916	30.6417	43.4527	37.0712	48.4811	7.04358	7.57925	6.16161	8.73773	7.4545	9.74887
LINC00597	1497	0.334218	-0.492058	0.321875	0.539916	0	0.714123	0.466769	0.702693	0.910106	0.369158	0.884692	0.477036	0.311803	0.469401	0.607954	0.246599	0.590977
LOC642361	1701	0.334164	2.72205	0.0101791	0.0584026	0	5.74869	7.33217	6.23906	7.43576	5.44023	7.18812	3.37959	4.3105	3.66788	4.37141	3.19825	4.22582
ITGA10	5269	0.334156	1.34104	0.142528	0.330761	0	2.42802	2.2366	1.59703	3.67915	2.56468	2.41079	0.460812	0.424483	0.303099	0.698264	0.486748	0.457541
P2RX5-TAX1BP3	6285	0.33398	2.48474	0.0301098	0.120241	0	5.32021	5.46509	5.34472	6.75802	4.0996	6.3919	0.846494	0.869545	0.850394	1.07526	0.652283	1.01701
LINC01550	1458	0.333924	2.32456	0.0207827	0.0949176	0	4.17762	5.9902	4.28004	5.67364	4.74077	4.95428	2.86531	4.10851	2.93555	3.89139	3.25156	3.39799
FSIP1	2813	0.333573	0.297488	0.126134	0.305549	0	1.08904	1.22527	0.958218	1.4523	1.10747	1.30492	0.387144	0.435574	0.340639	0.516281	0.393699	0.463889
DLGAP4	6071	0.33325	5.6902	0.00347406	0.0279159	0	41.9369	62.0414	46.761	61.1514	48.3209	49.3437	6.90773	10.2193	7.70236	10.0727	7.95929	8.12777
CD14	1806	0.333203	-1.83181	0.398827	0.611463	0	0.214237	0.311179	0.234231	0.213004	0.194294	0.287525	0.118625	0.172303	0.129696	0.117942	0.107582	0.159205
BAALC-AS1	726	0.33271	-0.876775	0.336086	0.553516	0	0.410621	0.486218	0.383287	0.813287	0.544023	0.375994	0.565593	0.669722	0.527944	1.12023	0.749342	0.517898
PHLDB2	6624	0.332604	6.15072	0.000954218	0.0109248	0	64.1818	72.1742	60.6871	81.0769	63.7089	84.2669	9.68928	10.8959	9.1617	12.2399	9.61789	12.7215
ADAMTS13	5257	0.332573	3.42465	0.015722	0.0785427	0	10.8725	11.2803	9.02854	13.671	8.49064	10.8154	2.0682	2.14576	1.71743	2.60053	1.61511	2.05733
SPIN1	4534	0.332238	7.29487	0.000625275	0.00812787	0	143.307	160.996	135.833	174.799	137.832	189.214	31.6071	35.5087	29.9587	38.5528	30.3996	41.7321
AASDH	3906	0.331518	4.82439	0.00482541	0.0351059	0	26.5118	29.8927	23.6999	28.1939	24.9473	36.582	6.78746	7.65301	6.06757	7.21811	6.38692	9.3656
ENHO	1078	0.331486	3.00636	0.0194388	0.0907925	0	6.62349	10.3662	7.75092	8.69442	6.89743	7.65259	6.14424	9.61611	7.19009	8.06533	6.39836	7.09887
SNORA34	137	0.331328	0.32086	0.278499	0.496753	0	0.892653	1.84763	1.49056	1.37484	0.854893	0.796223	6.51572	13.4863	10.88	10.0353	6.24009	5.81185
ACKR2	2960	0.331143	-0.726467	0.28962	0.508151	0	0.428474	0.680705	0.553637	0.774559	0.524593	0.420229	0.144755	0.229968	0.187039	0.261675	0.177227	0.141969
LOC101927502	1448	0.33111	1.19897	0.0598844	0.187135	0	1.76745	2.56723	2.17196	2.3624	2.07894	2.63196	1.22062	1.77295	1.49997	1.63149	1.43573	1.81765
FLJ23867	2716	0.330839	2.38274	0.0258309	0.109095	0	4.83818	5.81517	4.98273	6.21583	3.94416	5.26392	1.78136	2.14108	1.83458	2.2886	1.4522	1.93811
MYBPHL	1372	0.330824	-1.28936	0.434422	0.64225	0	0.553445	0.311179	0.234231	0.484099	0.174864	0.442346	0.403386	0.226807	0.170722	0.352842	0.127452	0.32241
RPGRIP1L	6924	0.330715	4.26638	0.0253164	0.107757	0	16.9069	16.0841	16.46	26.1026	17.6807	22.0288	2.44178	2.32295	2.37725	3.76988	2.55354	3.18152
AK9	7553	0.330684	4.24879	0.00586884	0.0398455	0	16.6926	17.9706	16.2897	21.9394	17.4476	23.5549	2.21006	2.37927	2.15672	2.90472	2.31002	3.11862
SP2-AS1	2182	0.330353	-0.696525	0.291279	0.509822	0	0.571298	0.7585	0.532343	0.735831	0.427446	0.420229	0.261823	0.347617	0.24397	0.337228	0.195897	0.192589
ACAD10	4107	0.330072	5.23728	0.000675099	0.00851518	0	34.6885	41.6786	33.133	42.6975	32.3499	41.5584	8.44619	10.1482	8.06745	10.3963	7.87677	10.1189
FAM66D	1071	0.329886	-0.419787	0.222381	0.435364	0	0.660564	0.719602	0.723987	0.774559	0.505164	0.884692	0.616773	0.671898	0.675991	0.723211	0.471675	0.826043
LINC00173	2004	0.329831	3.49023	0.00565111	0.038961	0	9.85489	12.5055	9.94417	11.3086	9.9867	13.6464	4.91761	6.24028	4.96216	5.64299	4.98338	6.80957
AKT3	14682	0.329819	3.98365	0.0315121	0.123978	0	13.5683	13.3029	13.3938	21.9006	14.9995	17.539	0.924147	0.90607	0.912257	1.49167	1.02162	1.19459
POP1	4771	0.329671	4.05688	0.0305297	0.12131	0	14.7466	13.8475	13.266	21.9394	16.1264	19.7286	3.09089	2.90243	2.78055	4.59849	3.38008	4.13511
DMAP1	1766	0.328433	5.07755	0.00175912	0.017132	0	29.6361	41.3869	30.45	36.9464	29.6492	34.3039	16.7815	23.4354	17.2424	20.921	16.7889	19.4247
TBC1D24	6595	0.328278	5.95493	0.00113685	0.0123185	0	53.6485	69.004	53.4898	74.2221	57.783	63.8084	8.13472	10.4631	8.11066	11.2543	8.76163	9.67527
STRA13	796	0.328103	4.8369	0.00391791	0.03048	0	23.2268	34.1908	25.7441	33.2479	26.9874	27.8457	29.1794	42.9533	32.3418	41.7688	33.9038	34.982
FAM53B	5740	0.328035	7.09442	0.00154544	0.0155851	0	116.027	171.129	123.269	148.038	124.193	137.061	20.2138	29.8135	21.4755	25.7905	21.6363	23.8782
RHOBTB2	5823	0.328034	5.27282	0.00278585	0.0238709	0	33.5459	41.5036	32.6646	48.2937	36.5467	39.1697	5.76093	7.12752	5.60958	8.29362	6.27626	6.72673
RGAG1	5426	0.327994	-1.99378	0.431694	0.640447	0	0.214237	0.194487	0.191644	0.271096	0.155435	0.24329	0.0394834	0.0358436	0.0353195	0.0499623	0.0286463	0.0448379
LRRC66	3329	0.327888	-0.668784	0.313187	0.532179	0	0.571298	0.525115	0.617518	0.542191	0.388588	0.928927	0.171613	0.15774	0.185497	0.162869	0.116728	0.279041
PGM2L1	8513	0.327646	5.88254	0.00689844	0.0445779	0	56.505	54.787	53.426	69.4198	46.9414	72.7217	6.63749	6.43569	6.27581	8.15457	5.51408	8.54243
ABHD15	3355	0.327599	4.70301	0.00419723	0.0319314	0	24.0302	28.1812	20.6123	32.0667	24.5393	26.585	7.16251	8.39976	6.14376	9.55789	7.31425	7.92399
HECTD2	6430	0.327366	3.25702	0.0271415	0.112295	0	9.69422	8.90751	7.8148	10.3597	7.81061	12.5847	1.50765	1.38531	1.21536	1.61115	1.21471	1.95719
WDR26	6872	0.327125	7.73701	0.000357243	0.00547688	0	192.438	225.099	186.767	242.921	188.465	244.153	28.0032	32.756	27.178	35.3494	27.425	35.5286
SLC9B1	2375	0.326806	2.10946	0.0414614	0.147545	0	4.26688	4.33706	3.83287	4.49244	3.28356	5.48509	1.79658	1.82613	1.61384	1.89155	1.38255	2.30951
JAK1	5053	0.3268	7.2828	0.000454265	0.00647904	0	144.092	165.197	131.617	174.605	138.648	179.946	28.5162	32.6929	26.0472	34.5547	27.4388	35.6118
UBE3C	5181	0.326559	7.19475	0.000480009	0.00668877	0	130.167	151.622	127.038	170.074	132.664	167.229	25.1239	29.265	24.52	32.8264	25.6058	32.2773
FBRS	4108	0.326391	7.31665	0.00336072	0.0272299	0	136.63	200.866	143.818	181.711	143.855	149.358	33.2594	48.8964	35.0092	44.2336	35.0183	36.3579
FAM83E	2011	0.32636	-0.458453	0.247224	0.462252	0	0.553445	0.777949	0.809161	0.793923	0.485734	0.729871	0.275209	0.386847	0.402368	0.39479	0.241539	0.362939
ADGRB2	5440	0.326284	6.58901	0.00121686	0.012971	0	83.8916	118.054	86.2609	105.921	86.0527	97.2055	15.4212	21.701	15.8568	19.4708	15.8185	17.8687
SRSF6	4014	0.326237	8.32798	0.00126629	0.0133271	0	293.237	365.869	289.808	318.537	272.361	388.092	73.0535	91.1483	72.1992	79.3566	67.8528	96.6847
TMEM72-AS1	3300	0.326055	-1.52782	0.393104	0.606539	0	0.23209	0.44732	0.298112	0.348551	0.291441	0.221173	0.0703303	0.135552	0.090337	0.105622	0.0883153	0.0670221
UQCC2	1338	0.326018	4.82591	0.00249467	0.0220846	0	22.6198	33.0628	26.4681	31.9312	26.3657	29.5266	16.9057	24.7106	19.7818	23.8649	19.7053	22.0677
EIF4G2	4359	0.325952	9.80809	0.000490162	0.00679898	0	777.769	991.612	772.387	987.039	836.59	1013.13	178.428	227.486	177.194	226.437	191.922	232.422
MKL2	8816	0.325898	6.65469	0.000597076	0.00786236	0	90.3365	104.09	88.4967	115.777	89.3363	116.293	10.2469	11.8069	10.0382	13.1326	10.1334	13.1911
NPIPA5	2176	0.32586	1.39919	0.101464	0.265942	0	2.73152	2.76172	2.49137	3.29187	1.69036	2.60984	1.25529	1.26917	1.14493	1.51281	0.776818	1.19938
SCNN1D	3054	0.325779	4.1649	0.00467503	0.0344252	0	16.1927	19.896	16.46	22.0556	15.0189	17.7602	5.30214	6.51475	5.38967	7.22186	4.91778	5.81539
LINC00174	4424	0.325587	3.35941	0.0180684	0.0864443	0	8.26597	9.72436	9.36924	13.3418	9.61754	11.0587	1.86844	2.19809	2.11782	3.01577	2.17395	2.49969
WHAMMP3	3588	0.325408	-0.527896	0.26612	0.48234	0	0.731976	0.661256	0.596224	0.793923	0.408017	0.729871	0.204007	0.184297	0.166172	0.221272	0.113717	0.20342
FAM43B	2582	0.324868	0.0866469	0.215518	0.42667	0	0.999772	1.24472	0.596224	1.16184	1.10747	0.995279	0.387208	0.482075	0.230916	0.449976	0.428921	0.385468
SAP30L	6269	0.324867	5.66431	0.0038861	0.0303104	0	44.2756	49.7109	44.3974	65.2372	46.3196	54.121	7.06263	7.92964	7.08206	10.4063	7.38868	8.63312
LOC283177	2737	0.324621	1.91453	0.0308601	0.12211	0	3.32067	3.7925	3.3857	4.10516	3.24471	4.57828	1.21325	1.38564	1.23701	1.49988	1.1855	1.67274
NBEA	11210	0.32462	4.71692	0.00450658	0.0334942	0	23.9767	24.9138	23.2102	31.8731	22.7712	30.8536	2.13886	2.22246	2.07049	2.84327	2.03133	2.75233
LCOR	10524	0.324543	6.64115	0.0045227	0.0335975	0	95.7639	96.5045	85.3027	108.322	84.7121	128.103	9.09957	9.16995	8.10554	10.2929	8.04942	12.1725
C6orf89	7239	0.324471	7.69571	0.000395416	0.00588925	0	185.529	225.877	180.549	222.705	186.133	242.936	25.6291	31.2028	24.9412	30.7646	25.7126	33.5594
GTF2H5	7486	0.324457	4.09296	0.00341831	0.0275461	0	15.7643	17.9706	14.6714	18.1053	14.9218	20.7681	2.10583	2.40056	1.95984	2.41856	1.99329	2.77426
HCN2	3408	0.324347	3.36106	0.0117369	0.0644828	0	10.0334	12.6222	8.19808	11.0956	9.01523	10.4172	2.94408	3.7037	2.40554	3.25574	2.64531	3.0567
UBQLNL	2334	0.3243	-1.5409	0.425251	0.635188	0	0.374914	0.252833	0.212937	0.29046	0.213723	0.486581	0.160632	0.108326	0.0912327	0.124447	0.0915695	0.208475
UNG	2366	0.32421	6.38816	0.00208696	0.0195183	0	71.5551	99.2468	78.1693	98.3883	73.3653	81.5907	30.2431	41.9471	33.0386	41.5842	31.0082	34.4847
SP5	1947	0.324164	1.88409	0.0937966	0.252755	0	3.08858	5.17336	2.7256	3.58233	3.9053	3.40606	1.58633	2.65709	1.3999	1.83992	2.00581	1.74939
LOC100133331	4273	0.324057	1.51649	0.0537737	0.174638	0	2.30305	3.20904	2.85336	2.86587	2.38981	3.36183	0.538976	0.751003	0.667765	0.670692	0.559282	0.786761
DIS3L	3839	0.323853	4.9258	0.00189875	0.0181111	0	27.0831	35.2994	29.0446	32.454	24.7919	33.5077	7.05473	9.19495	7.56568	8.45377	6.4579	8.72824
ATP5H	622	0.323755	5.39092	0.00308397	0.0256805	0	38.6876	51.5391	33.5802	43.4721	39.4222	44.8097	62.1987	82.8603	53.9875	69.8908	63.3797	72.0412
MRPS6	990	0.323308	4.63285	0.00350833	0.0281168	0	20.9416	25.2444	21.0169	27.4387	24.073	29.9689	21.1532	25.4994	21.2292	27.7159	24.3162	30.2717
FGD6	9288	0.323256	5.28178	0.00225712	0.0207078	0	35.7954	39.8893	32.2387	42.2134	35.5363	47.5522	3.85394	4.29472	3.47101	4.54494	3.82605	5.11975
BPHL	2231	0.32316	3.92374	0.0135798	0.071102	0	14.6931	16.9009	14.9056	16.6724	10.7639	16.9197	6.58587	7.5755	6.68113	7.47305	4.82469	7.58392
ZNF264	12163	0.323118	7.74039	0.000339516	0.00530721	0	191.742	237.644	191.409	229.928	186.736	245.391	15.7644	19.5383	15.737	18.9039	15.3528	20.1752
AVIL	2995	0.322941	1.34451	0.0961595	0.256476	0	2.33875	2.68392	1.66091	3.07887	2.6424	2.56561	0.780885	0.896134	0.554561	1.028	0.882269	0.85663
INTS6-AS1	787	0.322916	2.63291	0.0222823	0.0992962	0	5.71298	6.00965	5.49378	7.80368	5.2265	6.74578	7.25919	7.63615	6.98066	9.91573	6.64104	8.57151
RABL3	3883	0.322878	4.66452	0.0053319	0.0374767	0	23.9231	27.3449	23.849	26.0639	19.7402	31.0748	6.16099	7.04221	6.14189	6.71231	5.08376	8.00278
ZBTB16	2425	0.322799	4.6646	0.00892413	0.0533846	0	21.7093	27.6755	25.1479	32.2604	20.6923	24.4617	8.9523	11.4126	10.3703	13.3032	8.5329	10.0873
ZNF280C	4695	0.322736	5.13688	0.00169902	0.0166894	0	32.0998	35.7467	30.663	39.1733	30.9316	42.3104	6.83702	7.61379	6.53098	8.34362	6.58819	9.0118
ABCD1	3664	0.322464	5.15182	0.00692401	0.0446669	0	30.2967	46.6964	32.8988	37.1401	31.5144	34.5251	8.26874	12.7446	8.97893	10.1365	8.6011	9.42279
BBC3	2095	0.322461	2.15721	0.103598	0.269575	0	3.67773	6.69036	3.61993	4.0858	4.48819	3.93688	1.75548	3.19349	1.72789	1.95026	2.14233	1.87918
RHBDF1	2992	0.322366	-1.33577	0.344824	0.562559	0	0.357061	0.427872	0.298112	0.445371	0.291441	0.309642	0.119339	0.143005	0.0996364	0.148854	0.0974066	0.10349
CYP46A1	2077	0.322331	2.13919	0.030283	0.120741	0	4.3383	4.74549	3.91805	4.9959	3.38071	4.82157	2.08873	2.28478	1.8864	2.40535	1.62769	2.32141
GCLC	3813	0.322283	6.19047	0.000660231	0.00839674	0	66.4134	77.7171	63.1998	81.2125	65.0107	84.4439	17.4176	20.3821	16.5748	21.2988	17.0497	22.1463
ZNF513	2354	0.32214	4.49577	0.00873604	0.0526352	0	17.9245	28.0645	22.7204	24.6503	19.4682	22.3385	7.61448	11.922	9.65183	10.4717	8.27028	9.48958
ACVR2A	5443	0.322046	0.387872	0.157191	0.350366	0	1.08904	1.26417	1.3628	1.37484	0.952039	1.61456	0.20008	0.232255	0.250376	0.252589	0.174911	0.296631
MGAT5	8145	0.321847	7.11725	0.000320608	0.00508535	0	125.239	157.787	121.608	154.098	123.299	150.774	15.3762	19.3723	14.9304	18.9194	15.138	18.5112
FAM166A	1148	0.321653	0.450509	0.164366	0.360454	0	1.16045	1.82818	1.21374	1.47166	1.16576	1.10587	1.01084	1.59249	1.05727	1.28194	1.01547	0.963297
SREK1	8932	0.321626	6.44773	0.011589	0.0639719	0	84.6057	77.0558	74.3151	103.152	73.7539	110.675	9.4722	8.62694	8.3201	11.5486	8.25727	12.3908
BACE1	6020	0.321359	-1.25358	0.404641	0.616746	0	0.357061	0.427872	0.447168	0.561555	0.213723	0.265408	0.0593125	0.071075	0.0742804	0.0932816	0.0355022	0.0440876
ADAM10	5034	0.321281	7.58144	0.00325964	0.0265736	0	176.995	180.815	162.769	219.917	170.998	237.518	35.16	35.9187	32.334	43.6862	33.9686	47.1827
SH3GL3	2514	0.321131	3.29935	0.0094592	0.0555774	0	8.49806	11.4553	8.53878	9.64326	9.13181	11.6116	3.38029	4.5566	3.39649	3.83582	3.63238	4.61877
MIR181A1HG	604	0.320977	5.30365	0.0110809	0.0620262	0	36.1346	35.1244	33.8357	45.3504	35.2837	51.091	59.8255	58.1529	56.0194	75.0835	58.4168	84.5877
IFIT5	4034	0.320833	5.14149	0.00208752	0.0195183	0	30.868	35.7856	31.5786	38.4956	31.631	43.2614	7.65195	8.87101	7.82811	9.54278	7.84111	10.7242
NMRK1	1450	0.320464	3.106	0.0134863	0.0708677	0	8.42665	9.0242	6.70752	9.43025	7.71346	10.1297	5.81148	6.22359	4.62588	6.50362	5.31963	6.98602
SLC16A2	4141	0.320453	-1.80058	0.558682	0.736819	0	0.178531	0.213936	0.0851749	0.464735	0.388588	0.132704	0.0431129	0.0516628	0.0205687	0.112228	0.0938391	0.0320463
MPP7	5206	0.320413	1.45148	0.178625	0.380218	0	2.73152	2.11991	1.61832	3.07887	2.81726	3.82629	0.524687	0.407205	0.310857	0.591408	0.541156	0.734978
ZNF703	3349	0.320254	2.74411	0.0316476	0.124381	0	5.37377	8.61578	5.98354	7.35831	6.43112	6.19284	1.60459	2.57264	1.78666	2.19717	1.92031	1.84916
HERC2P7	1764	0.320062	-1.14398	0.34925	0.566937	0	0.482033	0.369526	0.3407	0.503463	0.272011	0.508698	0.273261	0.209482	0.19314	0.28541	0.154201	0.288378
IFFO2	5835	0.319853	4.34675	0.00215485	0.019963	0	18.1209	24.097	18.3126	21.3585	17.7779	22.2058	3.10555	4.12973	3.13841	3.6604	3.04677	3.80562
CBFA2T3	4553	0.319786	8.1023	0.00387252	0.0302512	0	224.502	323.782	258.591	331.55	250.289	259.923	49.3087	71.114	56.7957	72.8201	54.9724	57.0882
EPHA3	6674	0.319686	8.28889	0.00125303	0.0132632	0	278.794	335.276	271.665	320.377	284.174	386.08	41.7731	50.2362	40.705	48.0037	42.5793	57.8483
LINC00324	2094	0.319493	0.218861	0.150728	0.341669	0	1.07118	1.28362	0.958218	1.10375	0.971469	1.37127	0.511549	0.612997	0.457602	0.527099	0.46393	0.654858
2023-03-02	1651	0.31945	4.08582	0.00776256	0.0484265	0	15.2287	21.8798	14.8417	17.505	15.1549	17.0303	9.22391	13.2525	8.98954	10.6027	9.17923	10.3152
NFKB2	3885	0.319045	5.84577	0.00141801	0.0145717	0	50.917	67.8566	49.8273	65.4502	52.6925	58.08	13.106	17.4663	12.8256	16.8469	13.5631	14.9498
GSTO2	1591	0.318716	0.316162	0.178146	0.379679	0	1.28542	1.32251	0.809161	1.20057	1.10747	1.50398	0.807933	0.831246	0.508587	0.754598	0.696087	0.945303
DPY19L2	4057	0.318576	2.17734	0.0371258	0.137728	0	4.12406	4.22037	4.13098	5.15082	3.73044	5.59568	1.01653	1.04027	1.01824	1.26961	0.919507	1.37926
AMER1	8443	0.318461	6.02521	0.00200671	0.0189145	0	56.4335	70.5599	56.0025	79.5859	61.3774	66.5731	6.68406	8.35721	6.63301	9.42626	7.26962	7.885
METTL1	1307	0.318213	2.39814	0.0340544	0.1303	0	4.73106	6.04855	4.85497	6.52566	4.39104	4.82157	3.61979	4.62781	3.71459	4.99285	3.35963	3.68904
NRIP1	7556	0.317923	2.6857	0.0681475	0.204483	0	6.78417	7.99342	5.60025	5.48	4.68248	7.85164	0.897852	1.05789	0.741166	0.725252	0.619703	1.03913
SPAST	5213	0.317788	5.28739	0.00219556	0.0202535	0	35.4383	39.442	33.0904	43.3172	35.6723	47.1762	6.79807	7.56608	6.34768	8.30946	6.84296	9.04972
RPUSD1	2050	0.317661	5.01718	0.0124065	0.0670191	0	26.494	40.4144	30.1732	38.3794	29.7658	28.8188	12.9239	19.7144	14.7186	18.7217	14.5199	14.058
CHKB-CPT1B	4276	0.317638	0.343424	0.269171	0.485726	0	1.19616	0.777949	0.873043	1.80085	1.20462	1.52609	0.279737	0.181934	0.204173	0.421153	0.281717	0.356898
OBSCN	28628	0.317297	7.65253	0.00178794	0.0173288	0	185.833	211.738	181.785	250.454	169.793	207.394	6.49129	7.39619	6.34989	8.74855	5.93102	7.24444
COPG2	4029	0.31727	6.36572	0.00147449	0.0149994	0	73.5368	97.477	70.6952	82.7616	75.9689	94.1533	18.2519	24.1938	17.5466	20.5415	18.8555	23.3689
GLRB	3214	0.317181	5.12531	0.00395737	0.030661	0	32.9746	33.8602	30.7481	40.1028	29.4161	42.1335	10.2597	10.5352	9.56694	12.4775	9.15248	13.1094
UBE3B	5977	0.316928	6.29406	0.0010789	0.0119074	0	70.4839	81.8791	66.9262	92.8889	72.1413	86.2796	11.7925	13.699	11.1973	15.5411	12.0698	14.4353
MBNL1-AS1	6656	0.316593	1.23897	0.0695615	0.207018	0	2.07096	2.64503	2.32102	2.43986	1.82636	2.65408	0.311141	0.39739	0.34871	0.366565	0.274393	0.398749
LOC93622	1668	0.316516	5.23028	0.00119326	0.0128096	0	34.0637	41.8731	34.3894	39.9479	31.767	42.996	20.4219	25.1038	20.6171	23.9496	19.045	25.777
ZNF678	8940	0.316361	6.47202	0.00659978	0.0434261	0	87.3551	85.6327	76.8916	96.7811	72.8602	112.931	9.77126	9.5786	8.60085	10.8256	8.14991	12.6321
GNMT	1068	0.316309	1.1396	0.0929601	0.251216	0	1.99954	2.91731	1.93773	2.11067	1.84579	2.1675	1.87223	2.73156	1.81435	1.97629	1.72827	2.02949
LOC153684	2260	0.31625	3.43133	0.0158436	0.0790444	0	9.10506	11.6303	10.7959	13.4386	8.8598	10.6827	4.02879	5.14616	4.77695	5.94628	3.92026	4.72684
PLXNA1	9066	0.316055	7.20686	0.00110144	0.0121006	0	132.22	172.141	128.976	172.204	133.558	147.058	14.5841	18.9875	14.2263	18.9945	14.7317	16.2208
EOMES	3660	0.315876	2.08165	0.0314909	0.123927	0	3.82056	4.97887	3.98193	4.2988	3.41957	4.68887	1.04387	1.36035	1.08796	1.17454	0.934309	1.28111
SNORD16	100	0.315621	-0.864906	0.299835	0.518724	0	0.357061	0.486218	0.511049	0.619647	0.505164	0.597167	3.57061	4.86218	5.11049	6.19647	5.05164	5.97167
DENND5A	4966	0.315427	7.58221	0.000434109	0.00626668	0	169.997	213.722	173.203	219.394	169.016	204.253	34.2322	43.037	34.8778	44.1792	34.0347	41.1303
TMC3-AS1	1077	0.315351	0.923673	0.118585	0.293079	0	1.4461	1.71149	1.91644	2.11067	1.63207	2.38867	1.34271	1.58912	1.77942	1.95977	1.51538	2.21789
PCBP2-OT1	590	0.314697	2.64728	0.0246621	0.106004	0	5.14168	7.72114	6.15389	6.50629	5.38194	6.48037	8.71472	13.0867	10.4303	11.0276	9.12193	10.9837
KIDINS220	7361	0.314641	7.01628	0.00171548	0.0168184	0	117.205	126.708	111.473	153.672	117.392	150.066	15.9225	17.2135	15.1437	20.8766	15.9479	20.3866
PBX3	3104	0.314516	4.98186	0.00630259	0.0419075	0	27.583	29.8538	28.9808	39.8704	27.8617	35.255	8.88627	9.61784	9.33658	12.8448	8.97607	11.3579
PSMB8-AS1	12688	0.314515	3.14314	0.0100821	0.0579781	0	8.26597	9.33538	8.11291	10.0886	7.15001	9.8422	0.651479	0.735765	0.639416	0.795131	0.563525	0.775709
TPST2	2075	0.314503	4.5741	0.0056449	0.038936	0	21.0131	24.6804	19.9096	29.9367	22.6741	24.4617	10.1268	11.8942	9.595	14.4273	10.9273	11.7888
MNX1-AS1	987	0.314492	2.07807	0.0439183	0.153602	0	3.32067	5.13446	3.98193	4.7829	3.9053	3.98111	3.36441	5.20209	4.03437	4.8459	3.95674	4.03355
RNU4-1	144	0.314268	5.64277	0.435339	0.642761	0	31.8677	66.573	58.0467	65.5858	43.755	33.7068	221.304	462.312	403.102	455.457	303.854	234.075
CASD1	3879	0.314127	5.97849	0.00295218	0.0249814	0	57.7547	62.0803	53.6389	69.8458	57.1418	77.676	14.8891	16.0042	13.828	18.0061	14.7311	20.0247
CCDC64	3081	0.314003	4.03266	0.0144679	0.0743874	0	13.9432	15.8507	13.3512	20.7969	16.379	17.6496	4.52556	5.14466	4.33339	6.75005	5.31612	5.72853
LYRM5	1135	0.314002	3.4432	0.0144576	0.0743598	0	9.96201	10.0939	9.43312	12.7802	9.59811	13.204	8.7771	8.89329	8.31112	11.2601	8.45649	11.6335
SCAMP4	2526	0.313863	5.46338	0.00525213	0.0371054	0	37.7592	56.2262	41.0969	47.3643	39.0919	42.9518	14.9482	22.259	16.2696	18.7507	15.4758	17.0039
MPPED2	7209	0.313772	4.32082	0.00226731	0.0207762	0	18.3172	21.3741	17.397	23.2561	17.6419	21.6971	2.54089	2.96492	2.41323	3.22598	2.4472	3.00972
VPS9D1-AS1	1753	0.313123	3.69984	0.0219859	0.0983522	0	12.1401	15.345	11.5838	16.2851	10.9387	11.3904	6.92532	8.75359	6.60798	9.28984	6.24001	6.49767
CYBA	723	0.312932	5.94681	0.00868653	0.0524203	0	49.7208	77.3281	57.0459	70.2718	58.2298	57.2617	68.7701	106.954	78.9016	97.1948	80.5392	79.2001
LOC100133985	661	0.312902	0.156432	0.215735	0.426989	0	0.892653	1.53645	1.0221	0.871379	0.971469	1.17222	1.35046	2.32443	1.54629	1.31827	1.4697	1.7734
PRKCG	3128	0.312727	2.07336	0.0389446	0.141801	0	3.767	4.18147	4.02451	5.15082	3.38071	4.53405	1.20428	1.33679	1.28661	1.64668	1.08079	1.4495
ARL3	3874	0.312331	4.73411	0.00437449	0.0327232	0	23.4946	27.5588	21.3363	30.2272	26.2879	30.5661	6.0647	7.11379	5.50757	7.80257	6.78574	7.89006
SLC25A34	3073	0.311801	1.95958	0.0386049	0.141141	0	3.03502	4.43431	3.66252	4.33753	3.63329	4.02535	0.987641	1.44299	1.19184	1.4115	1.18233	1.30991
TREX2	1255	0.3118	0.756793	0.101199	0.265385	0	1.55322	1.69204	1.44797	1.85894	1.41834	1.94632	1.23762	1.34824	1.15376	1.48123	1.13015	1.55085
MIR3936	110	0.311465	-0.500641	0.287651	0.505724	0	0.660564	0.622359	0.660105	0.948834	0.466305	0.641402	6.00512	5.65781	6.00096	8.62577	4.23914	5.83092
POLR2A	6738	0.311424	9.49097	0.00181349	0.0174961	0	623.983	879.918	667.899	781.588	634.641	729.119	92.6065	130.59	99.1242	115.997	94.1884	108.21
SNORD2	70	0.311386	1.95922	0.0535333	0.174081	0	3.57061	4.16202	2.95983	3.79534	3.7693	4.86581	51.0088	59.4575	42.2833	54.2191	53.8471	69.5115
APLP1	2450	0.311308	4.97051	0.00174522	0.0170209	0	26.851	36.7775	29.0233	33.4028	27.9977	33.8616	10.9596	15.0112	11.8463	13.6338	11.4276	13.8211
U2AF2	3131	0.311271	7.84948	0.0047205	0.0346589	0	188.564	272.574	219.9	275.588	209.041	217.922	60.2249	87.0564	70.2332	88.0192	66.7648	69.6013
LOC100507506	2277	0.311057	-1.84925	0.548261	0.729618	0	0.214237	0.15559	0.0638812	0.271096	0.349729	0.375994	0.0940873	0.068331	0.028055	0.119058	0.153592	0.165127
CTBP1-AS2	2930	0.310885	5.12852	0.00239926	0.0214532	0	31.4571	40.1227	32.6859	40.5288	29.4549	35.4098	10.7362	13.6938	11.1556	13.8323	10.0529	12.0853
PIGQ	2985	0.310754	5.88421	0.00476275	0.0348509	0	52.8094	71.1628	56.258	68.2967	49.0397	56.5761	17.6916	23.8401	18.8469	22.88	16.4287	18.9535
SATB1-AS1	843	0.310588	2.2303	0.0548348	0.17644	0	3.89197	4.12313	4.59944	5.57682	4.00245	5.79473	4.61681	4.89102	5.45604	6.61545	4.74787	6.87394
AZIN1-AS1	884	0.310487	1.42249	0.109466	0.27886	0	2.26734	3.65636	2.7256	2.69159	2.09837	2.41079	2.56486	4.13615	3.08325	3.04479	2.37372	2.72713
LOC101928279	2386	0.310447	-1.2633	0.360419	0.577198	0	0.267796	0.369526	0.319406	0.426007	0.427446	0.464463	0.112236	0.154872	0.133867	0.178545	0.179148	0.194662
TTYH3	4822	0.30999	7.64361	0.0053491	0.0375238	0	162.177	249.041	188.322	224.409	185.143	190.474	33.6328	51.6468	39.0547	46.5386	38.3954	39.5011
ARRDC1	1598	0.309937	4.97051	0.0068162	0.0442163	0	26.1012	37.1276	28.0864	37.2756	29.7269	29.5487	16.3337	23.2338	17.576	23.3264	18.6026	18.4911
GSDMB	1809	0.309866	4.95875	0.00418036	0.0318511	0	29.3504	31.7014	28.9595	36.869	24.9085	34.5915	16.2247	17.5243	16.0085	20.3809	13.7692	19.1219
FAM69A	3099	0.309864	4.31086	0.00445502	0.0332251	0	18.0137	20.6934	16.8859	20.855	18.1665	24.2848	5.81276	6.67745	5.44883	6.72959	5.86204	7.83633
CCDC53	1015	0.30981	4.41523	0.0023768	0.0213847	0	19.3349	22.191	18.5681	24.5148	19.1574	24.0415	19.0491	21.863	18.2937	24.1525	18.8743	23.6862
DGAT2	2454	0.309742	3.60596	0.00965833	0.0564409	0	10.1048	14.7616	11.5412	13.3224	10.8999	12.2087	4.1177	6.01531	4.70301	5.42885	4.44168	4.97504
SLFNL1	2155	0.309665	-0.378859	0.243697	0.457919	0	0.714123	0.855743	0.511049	0.832651	0.718887	0.729871	0.331379	0.397097	0.237146	0.386381	0.33359	0.338687
HLA-B	9432	0.309576	7.93166	0.00140758	0.0144841	0	207.524	294.629	230.015	262.324	216.579	253.663	22.0021	31.2371	24.3866	27.8121	22.9622	26.8939
MFSD11	3631	0.309571	5.53979	0.0010172	0.0114554	0	42.4903	50.8778	39.6702	51.7792	42.3755	51.7102	11.7021	14.0121	10.9254	14.2603	11.6705	14.2413
PINX1	1570	0.309537	3.78875	0.00549236	0.0381443	0	12.5507	15.6757	11.3496	15.4912	13.0177	14.5974	7.99408	9.9845	7.22902	9.86699	8.29152	9.29772
PCDHB16	4532	0.309367	-1.95661	0.48418	0.682538	0	0.178531	0.213936	0.234231	0.348551	0.174864	0.154821	0.0393934	0.0472056	0.0516838	0.076909	0.0385844	0.0341618
RNF213	23207	0.309282	9.10896	0.000665922	0.00844077	0	503.671	602.735	497.485	638.333	478.371	592.191	21.7034	25.9721	21.4369	27.5061	20.6132	25.5178
PKD2	5079	0.308715	5.49587	0.00279318	0.0239165	0	42.2939	45.9962	41.7783	51.1209	36.7798	52.5949	8.32721	9.05615	8.22569	10.0651	7.24155	10.3554
MIR4659A	81	0.3085	-1.56797	0.471056	0.672043	0	0.178531	0.175038	0.298112	0.464735	0.330299	0.353877	2.20408	2.16097	3.6804	5.73747	4.07777	4.36885
ST7-AS1	1888	0.308493	-2.17691	0.562128	0.739487	0	0.196384	0.252833	0.191644	0.271096	0.0971469	0.0663519	0.104017	0.133916	0.101506	0.143589	0.0514549	0.035144
IFT22	2543	0.308371	4.02792	0.00545767	0.037973	0	13.5862	19.4293	14.6714	16.9047	15.3881	17.6938	5.34258	7.64029	5.76932	6.64756	6.05115	6.95786
ZSCAN23	3161	0.30826	2.0763	0.0605579	0.188584	0	4.24903	3.8314	3.61993	5.20891	3.32242	4.84369	1.3442	1.21208	1.14519	1.64787	1.05107	1.53233
VTI1A	4391	0.308078	5.52754	0.00103485	0.011584	0	41.2763	49.0497	40.671	52.4957	41.6177	51.4448	9.4002	11.1705	9.26236	11.9553	9.47796	11.716
RIC1	6971	0.307931	6.91728	0.00116688	0.0125888	0	113.367	131.337	105.83	126.04	104.744	143.696	16.2627	18.8405	15.1814	18.0806	15.0256	20.6134
RBM26-AS1	2471	0.307719	2.39631	0.0326167	0.126873	0	4.83818	4.97887	4.49298	6.00283	4.68248	6.3919	1.95799	2.01492	1.81828	2.42931	1.89497	2.58677
MAP2K4P1	2539	0.307624	-1.10268	0.329774	0.547286	0	0.446327	0.427872	0.3407	0.522827	0.349729	0.464463	0.175788	0.16852	0.134187	0.205919	0.137743	0.182932
ZC3H12B	7256	0.30754	4.12109	0.0168124	0.0823358	0	16.4962	19.4876	17.6312	18.7056	12.4542	19.4411	2.27346	2.68572	2.42988	2.57795	1.7164	2.67931
DAG1	6593	0.307138	6.15187	0.00174264	0.0170209	0	61.8609	84.0573	65.393	79.7602	63.3592	71.9697	9.38281	12.7495	9.91855	12.0977	9.61007	10.9161
GPR65	4522	0.306541	2.70321	0.0270171	0.111886	0	5.39163	6.80705	5.55766	6.68057	6.43112	8.02858	1.19231	1.50532	1.22903	1.47735	1.42219	1.77545
PRMT7	3097	0.306425	5.53824	0.00110595	0.012128	0	41.0085	51.5585	41.6931	53.1735	41.8703	49.2995	13.2414	16.6479	13.4624	17.1693	13.5196	15.9185
ACACB	9249	0.306147	5.25031	0.00153858	0.0155262	0	34.0994	43.2539	35.3902	42.6201	32.5442	40.2535	3.68682	4.67661	3.82638	4.60808	3.51867	4.3522
WASH2P	1958	0.305902	3.18656	0.0186843	0.0884961	0	8.21241	11.0663	8.94336	9.64326	7.18887	9.35562	4.19429	5.65185	4.5676	4.92505	3.67154	4.77815
UBTD1	1693	0.305853	3.28292	0.0511614	0.16946	0	7.19479	12.3305	8.87948	11.2892	9.96727	8.49304	4.24973	7.28322	5.24482	6.66816	5.88734	5.01656
UBXN2A	1893	0.305612	4.86872	0.00164875	0.0162801	0	26.0833	31.0596	26.6597	32.3185	25.5691	33.4192	13.7788	16.4076	14.0833	17.0726	13.5072	17.6541
SNORD13	104	0.305534	5.26409	0.531073	0.717717	0	24.2802	52.9783	45.5686	51.9729	33.3214	22.1837	233.463	509.407	438.159	499.739	320.398	213.304
LOC101928105	703	0.305414	-0.603537	0.323481	0.541352	0	0.64271	0.661256	0.489756	0.484099	0.524593	0.928927	0.91424	0.940621	0.696665	0.688619	0.746221	1.32138
EXOC6	3732	0.305288	4.70242	0.0118546	0.0648703	0	24.3873	24.7193	22.5075	27.5356	22.8684	34.0385	6.53464	6.62361	6.03094	7.37823	6.12765	9.12072
CLTB	1767	0.305282	4.52364	0.0149464	0.0759802	0	18.2101	28.4924	21.1873	26.335	22.2661	21.2768	10.3057	16.1247	11.9905	14.9038	12.6011	12.0412
FGFRL1	3237	0.305235	5.22331	0.00253137	0.0222846	0	31.475	43.9152	33.5376	41.497	35.1672	38.3293	9.7235	13.5666	10.3607	12.8196	10.8641	11.841
NLGN2	4646	0.305229	6.1375	0.00478773	0.0349654	0	60.3791	85.8077	64.0941	80.709	64.389	66.7721	12.9959	18.4692	13.7955	17.3717	13.859	14.372
ZBTB22	13645	0.305176	5.65317	0.00828749	0.050781	0	44.2578	65.795	46.9527	49.6298	43.7744	51.3121	3.24351	4.82191	3.44102	3.63722	3.20809	3.76051
SMARCD1	3429	0.305149	7.64962	0.000888928	0.0103098	0	176.888	238.227	183.424	214.417	178.537	213.1	51.5859	69.4743	53.492	62.5305	52.0666	62.1465
TAF6L	2115	0.304857	4.91509	0.00334999	0.0271931	0	25.7441	36.1163	27.043	33.3448	28.1143	30.4334	12.1722	17.0762	12.7863	15.7658	13.2928	14.3893
ASMTL-AS1	6034	0.304601	3.70019	0.0733009	0.214462	0	13.6933	11.183	11.7115	17.8729	9.36496	13.9118	2.26936	1.85333	1.94093	2.96204	1.55203	2.30557
SNORA61	130	0.304594	1.16141	0.0874177	0.240967	0	1.7496	2.21715	2.17196	2.45922	2.00123	2.63196	13.4585	17.055	16.7074	18.9171	15.394	20.2458
RPS26P11	553	0.304354	-0.366245	0.332831	0.550481	0	0.571298	0.972436	0.425874	0.755195	0.971469	0.707754	1.03309	1.75847	0.770117	1.36563	1.75672	1.27984
HOOK2	2610	0.304286	4.00549	0.00664952	0.0435693	0	14.5503	18.8847	14.7991	18.3764	13.6783	15.836	5.57481	7.23552	5.67017	7.04077	5.24072	6.06743
TTC38	2610	0.304153	2.03873	0.0449356	0.155681	0	3.71344	4.39541	3.96063	4.97654	3.26414	4.11382	1.42277	1.68406	1.51748	1.90672	1.25063	1.57618
CASKIN1	5695	0.30405	4.56584	0.00675907	0.0439964	0	22.4413	28.9202	21.4641	26.2382	19.5848	23.201	3.94053	5.07818	3.76893	4.60723	3.43895	4.07393
LINC01341	1123	0.303823	1.6855	0.0617704	0.191141	0	2.91005	3.01455	2.74689	4.00834	2.87555	3.51665	2.59132	2.68437	2.44603	3.56932	2.56059	3.13148
ZDHHC21	9171	0.30377	4.61582	0.0808276	0.229097	0	25.3335	19.3904	19.8457	29.2202	20.5174	32.623	2.76235	2.11431	2.16397	3.18615	2.23721	3.55719
PDPK1	7243	0.303742	6.39841	0.00130451	0.0136178	0	75.5006	89.6197	72.2709	98.8337	78.6501	91.0348	10.4239	12.3733	9.97803	13.6454	10.8588	12.5687
SIK1	9404	0.303694	0.504225	0.138154	0.324637	0	1.23186	1.38086	1.17115	1.60721	1.30177	1.59245	0.130993	0.146837	0.124538	0.170907	0.138427	0.169337
FOSB	3776	0.303648	0.826353	0.140118	0.327577	0	1.80316	1.96432	1.25633	2.13004	1.57378	1.63668	0.477532	0.520212	0.332714	0.564099	0.416785	0.433443
MED19	1514	0.303513	4.01911	0.006122	0.0411037	0	14.0682	19.2737	14.2242	18.0859	15.1549	16.2341	9.29209	12.7303	9.39512	11.9458	10.0098	10.7227
DLX2	2304	0.303451	1.95084	0.0948582	0.254574	0	3.39208	5.2706	3.55605	3.13696	3.34185	4.29076	1.47226	2.28759	1.54343	1.36153	1.45046	1.86231
CCDC102B	2919	0.303393	2.03168	0.0547521	0.176303	0	3.767	4.12313	3.44958	5.32509	3.65272	3.959	1.29051	1.41251	1.18177	1.82429	1.25136	1.35629
CD320	1251	0.303254	4.90667	0.019741	0.0916817	0	24.0659	36.7775	28.5975	36.0751	27.8423	26.3638	19.2374	29.3985	22.8597	28.837	22.256	21.0742
PDCL3	1075	0.303146	3.63268	0.00559684	0.0387456	0	10.5869	14.0031	11.4347	13.5354	11.2107	13.4473	9.84825	13.0261	10.637	12.5911	10.4286	12.5091
PRKCB	8014	0.303125	7.44565	0.000712998	0.00885228	0	158.625	192.62	161.087	187.889	148.44	197.109	19.7934	24.0354	20.1007	23.445	18.5226	24.5956
CHKA	2717	0.30311	4.92207	0.00507596	0.0363354	0	27.2616	29.387	28.3419	36.017	25.7439	34.9675	10.0337	10.816	10.4313	13.2562	9.47513	12.8699
DNAJC15	2776	0.303026	3.91033	0.0106398	0.0601349	0	12.64	14.4309	13.777	17.0209	13.892	18.291	4.5533	5.19847	4.96291	6.13146	5.00432	6.58898
LOC100129550	5904	0.302422	3.56255	0.0228966	0.100936	0	11.5866	11.008	10.6256	14.5617	9.42325	13.4694	1.96251	1.86449	1.79972	2.46641	1.59608	2.28141
SNORD12	90	0.302296	1.19252	0.120363	0.295805	0	1.69604	2.17826	2.51266	2.6335	1.86522	2.65408	18.8449	24.2028	27.9184	29.2611	20.7247	29.4897
ASB16-AS1	2258	0.30211	4.88609	0.00411237	0.0315334	0	27.2616	32.1682	27.7031	35.378	24.4033	30.2786	12.0734	14.2463	12.2689	15.6678	10.8075	13.4095
SUFU	5346	0.301954	5.47228	0.00320122	0.0262244	0	39.5088	49.5164	39.1805	53.5607	40.5102	43.8365	7.39036	9.26233	7.32893	10.0188	7.57767	8.19987
GHET1	1898	0.301935	1.3182	0.0892914	0.244663	0	2.08881	2.43109	2.49137	2.61414	2.04008	3.11854	1.10053	1.28087	1.31263	1.37731	1.07486	1.64307
ST3GAL1	6971	0.301768	6.98284	0.00284849	0.0242666	0	114.849	154.909	119.798	128.983	105.191	134.982	16.4752	22.2219	17.1853	18.5029	15.0897	19.3633
HGD	2010	0.301423	-0.223343	0.238141	0.452021	0	0.749829	0.933538	0.873043	0.852015	0.582881	0.928927	0.373049	0.464447	0.43435	0.423888	0.289991	0.462153
MRPL48	980	0.301401	4.27542	0.00391741	0.03048	0	16.6569	21.7242	16.5665	20.8744	18.7299	21.4317	16.9968	22.1676	16.9046	21.3004	19.1122	21.869
MAPRE2	4880	0.301305	7.08942	0.000956966	0.0109287	0	114.26	150.65	122.034	149.722	129.672	150.575	23.4139	30.8708	25.007	30.6808	26.5721	30.8554
HMG20A	4135	0.301222	6.20053	0.00101533	0.0114429	0	65.7886	78.8062	64.4135	83.3812	67.3811	81.2811	15.9102	19.0583	15.5776	20.1648	16.2953	19.6569
PCSK5	12191	0.301026	3.08733	0.0159547	0.0794172	0	8.06959	9.49097	7.62315	8.53951	7.05286	10.0191	0.66193	0.778523	0.62531	0.700477	0.57853	0.821847
SMIM17	2542	0.300917	2.17668	0.0763276	0.220426	0	4.85603	5.19281	4.0671	5.17018	3.1087	4.46769	1.91032	2.0428	1.59996	2.0339	1.22293	1.75755
WDR7	7282	0.300915	5.66329	0.00235037	0.0212037	0	46.9357	51.1696	44.3122	60.067	44.8819	56.4876	6.44544	7.02686	6.08517	8.2487	6.1634	7.75715
PARP11	4679	0.300655	5.30137	0.00255723	0.0224789	0	36.5988	43.0011	35.454	40.5675	33.8654	46.9329	7.82193	9.19023	7.57727	8.67012	7.23774	10.0305
MTMR1	4800	0.300652	5.85341	0.00117577	0.0126577	0	51.0062	63.6362	53.213	61.8098	51.1381	65.9096	10.6263	13.2575	11.086	12.877	10.6538	13.7312
A1BG-AS1	2130	0.300595	4.24111	0.00322834	0.0263753	0	16.8533	20.2267	17.2479	21.9006	16.651	20.37	7.91235	9.49609	8.09761	10.282	7.81736	9.5634
IQCH	5593	0.300378	2.0491	0.0616066	0.190813	0	3.4635	3.90919	3.49217	4.35689	4.08017	5.35239	0.619255	0.698944	0.624382	0.77899	0.729513	0.95698
MIR2278	96	0.300068	-1.70176	0.519982	0.709246	0	0.160678	0.136141	0.255525	0.464735	0.31087	0.287525	1.67373	1.41814	2.66172	4.84099	3.23823	2.99505
LRRC6	1987	0.29986	0.67832	0.123977	0.301909	0	1.39254	1.65314	1.51185	1.85894	1.30177	1.6588	0.700825	0.831978	0.760873	0.935552	0.655143	0.834825
ACOT12	1989	0.299643	-0.565663	0.333438	0.551126	0	0.428474	0.505667	0.638812	0.716467	0.660599	0.906809	0.215422	0.254232	0.321172	0.360215	0.332126	0.455912
GPR157	1153	0.299522	2.32707	0.0334073	0.128857	0	4.55253	5.89296	4.4078	5.7511	4.4299	4.82157	3.94842	5.11098	3.8229	4.98794	3.84206	4.18176
RNU86	55	0.29942	0.65139	0.187171	0.390077	0	1.10689	1.5559	1.55444	2.11067	1.47663	1.39339	20.1253	28.289	28.2626	38.3759	26.8479	25.3344
SAYSD1	6425	0.29939	6.10254	0.0027489	0.0236577	0	65.6636	76.4334	61.1769	69.9233	57.8801	81.0157	10.22	11.8963	9.52169	10.883	9.00858	12.6094
LPAR6	3458	0.299373	0.00505126	0.264807	0.480651	0	0.856947	0.7585	0.830455	1.00693	0.913181	1.45974	0.247816	0.219346	0.240155	0.291187	0.264078	0.422135
GADD45B	1375	0.299355	3.29457	0.00974102	0.0567271	0	8.85512	11.2997	8.4962	10.96	8.93751	10.0855	6.44009	8.21797	6.17905	7.97091	6.50001	7.3349
OGG1	2841	0.299094	4.72408	0.00235917	0.0212646	0	24.0659	28.8813	22.9333	30.5563	23.9953	27.912	8.47094	10.1659	8.07228	10.7555	8.44607	9.82472
DPY19L1	4865	0.299034	5.53576	0.0113429	0.063027	0	39.5267	42.2232	41.3737	53.1541	43.8132	58.1021	8.12471	8.67896	8.50436	10.9258	9.00581	11.9429
PCMTD1	4394	0.298838	5.5999	0.0132019	0.0699436	0	45.6503	44.1097	39.4147	56.1168	45.2899	60.2254	10.3892	10.0386	8.97011	12.7712	10.3072	13.7063
TIMELESS	5138	0.298379	7.595	0.000957447	0.0109287	0	169.818	224.944	180.507	206.11	169.852	208.61	33.0515	43.7804	35.1317	40.1148	33.0579	40.6015
ZNF524	1133	0.29818	3.2988	0.0277465	0.113742	0	7.74823	11.9999	9.43312	11.2505	9.22895	9.15656	6.83869	10.5912	8.32579	9.9298	8.14559	8.0817
LOC101927932	683	0.297879	-0.291258	0.249587	0.464567	0	0.714123	0.719602	0.723987	0.832651	0.660599	1.03951	1.04557	1.05359	1.06001	1.21911	0.967202	1.52198
AGBL4	2988	0.297857	-1.58126	0.512473	0.703044	0	0.321355	0.233385	0.319406	0.213004	0.155435	0.552933	0.107549	0.0781073	0.106896	0.0712864	0.0520197	0.185051
ELP6	1349	0.297849	5.15359	0.00215004	0.0199428	0	30.8322	41.0951	31.7915	37.082	33.0882	39.4794	22.8556	30.4634	23.5667	27.4885	24.528	29.2657
ZFP41	6215	0.297836	5.03882	0.00496231	0.0357754	0	29.0112	36.8748	30.2158	39.8123	29.1635	31.9153	4.66794	5.93319	4.86175	6.40584	4.69244	5.1352
MAT2A	3006	0.297819	8.21235	0.00207001	0.0194265	0	273.206	293.442	259.358	352.811	265.6	334.944	90.8867	97.6188	86.28	117.369	88.3565	111.425
SKI	5707	0.29775	6.68243	0.0025918	0.0227451	0	87.8192	118.462	95.0978	119.94	93.4553	101.253	15.388	20.7573	16.6634	21.0164	16.3756	17.7419
TG	8453	0.297711	-1.81364	0.580393	0.751661	0	0.142825	0.0777949	0.17035	0.329187	0.349729	0.420229	0.0168963	0.00920322	0.0201526	0.0389433	0.0413733	0.0497136
LINC01473	602	0.297657	0.737631	0.200938	0.408209	0	1.69604	1.26417	1.32021	1.89767	1.36006	2.25596	2.81734	2.09994	2.19304	3.15227	2.25923	3.74745
FUOM	975	0.297594	3.69574	0.00801625	0.0495803	0	10.9618	15.17	11.6477	13.3611	12.1822	14.2214	11.2429	15.559	11.9463	13.7037	12.4946	14.5861
TLN2	11649	0.297418	3.87145	0.00993696	0.057361	0	13.5862	16.9787	11.5625	15.9172	14.1252	15.3936	1.1663	1.45753	0.992574	1.3664	1.21256	1.32146
TNNC2	681	0.29725	-0.974263	0.387016	0.601244	0	0.446327	0.680705	0.532343	0.387279	0.291441	0.486581	0.655399	0.999567	0.781708	0.568692	0.42796	0.714509
LLGL1	4224	0.297103	6.27096	0.00808602	0.0498693	0	67.4667	97.6714	74.6345	83.5749	65.7296	74.0266	15.9722	23.123	17.6692	19.7857	15.561	17.5252
FZD6	3933	0.297092	5.69804	0.00535215	0.0375238	0	45.204	54.3397	46.6333	51.8761	47.8351	65.4451	11.4935	13.8164	11.8569	13.1899	12.1625	16.64
ADGRA3	4567	0.297036	5.52962	0.00502565	0.0360697	0	41.437	44.8876	40.3942	56.9688	42.4338	50.8256	9.07313	9.82869	8.8448	12.474	9.29139	11.1289
GPAT4	6310	0.297034	6.44843	0.000993867	0.0112737	0	78.2143	98.1966	77.3601	92.6759	79.4467	97.8912	12.3953	15.5621	12.2599	14.6872	12.5906	15.5137
LOC100132111	761	0.296996	-0.427798	0.315779	0.535024	0	0.624857	0.60291	0.447168	0.871379	0.816034	0.862575	0.8211	0.79226	0.587606	1.14504	1.07232	1.13348
C5orf42	11199	0.29658	6.34835	0.0189913	0.0895554	0	79.1962	70.7155	70.0563	97.575	70.0235	101.12	7.07172	6.31445	6.25559	8.71283	6.25265	9.0294
CDK5R1	3854	0.296389	4.80674	0.0102065	0.0584934	0	26.2262	35.5134	24.3387	26.6061	24.6947	30.3228	6.80492	9.21467	6.31519	6.9035	6.40756	7.86788
CHST2	4137	0.296186	5.86417	0.00991934	0.0573466	0	49.0602	68.6929	52.8084	70.4461	54.9268	53.3027	11.8589	16.6045	12.7649	17.0283	13.277	12.8844
TRIM66	9753	0.295921	6.05953	0.00140505	0.0144682	0	61.6466	70.9684	57.3014	75.016	60.5808	74.4468	6.32079	7.27657	5.87526	7.69158	6.2115	7.63322
GNPTG	1245	0.295886	4.12346	0.00571222	0.0392394	0	15.0501	20.849	16.0342	18.4926	15.7767	18.1583	12.0885	16.7462	12.8789	14.8535	12.672	14.585
MIR7111	72	0.295872	-0.330787	0.357518	0.574631	0	0.607004	1.05023	0.425874	0.793923	0.990898	0.641402	8.43062	14.5865	5.91492	11.0267	13.7625	8.90836
MUC20	18712	0.295768	1.66165	0.072035	0.211826	0	2.71367	3.05345	2.87465	4.04707	2.83669	3.22913	0.145023	0.163181	0.153626	0.216282	0.151597	0.17257
SNORA80B	136	0.295455	0.22892	0.195006	0.400836	0	1.03548	1.34196	1.04339	1.39421	0.971469	0.995279	7.61381	9.86736	7.672	10.2515	7.14315	7.31822
CCDC91	2335	0.295333	4.65135	0.0204825	0.0940663	0	24.298	22.2493	21.9538	29.1621	21.3335	31.6056	10.406	9.52862	9.40207	12.4891	9.13638	13.5356
HEY1	2578	0.295287	-0.445974	0.290499	0.509046	0	0.46418	0.7585	0.681399	0.852015	0.738316	0.685636	0.180054	0.29422	0.264313	0.330494	0.286391	0.265957
C7orf26	2178	0.295087	6.2095	0.00187884	0.0179664	0	63.2534	84.5436	70.0563	82.9165	66.0016	77.0346	29.042	38.8171	32.1654	38.07	30.3038	35.3694
EPHA10	6643	0.294973	3.23622	0.0155384	0.0779098	0	8.39094	10.7162	8.94336	10.9794	7.96604	9.31138	1.26313	1.61316	1.34628	1.65277	1.19916	1.40168
LENG1	9238	0.294776	3.11737	0.0171427	0.083519	0	7.24835	10.055	8.60266	9.19788	7.46088	9.31138	0.784623	1.08844	0.931226	0.995658	0.807629	1.00794
SPEF1	1587	0.294663	1.02608	0.157026	0.350231	0	1.85672	2.3144	1.42668	2.53668	2.07894	1.72515	1.16996	1.45835	0.898979	1.59841	1.30998	1.08705
ULK1	5222	0.294649	7.19777	0.00167776	0.0165127	0	130.792	172.724	134.704	165.349	130.021	147.014	25.0463	33.0762	25.7955	31.6639	24.8988	28.1528
S100A13	1402	0.294634	0.651955	0.149359	0.339702	0	1.46395	1.98377	1.27762	1.56848	1.37949	1.50398	1.04419	1.41496	0.911286	1.11875	0.983941	1.07274
DDHD1	12982	0.294593	7.74174	0.00534894	0.0375238	0	207.613	203.881	187.896	248.44	181.159	255.057	15.9924	15.7049	14.4736	19.1372	13.9547	19.647
RPL23AP53	5788	0.294572	4.72627	0.0117713	0.0646011	0	25.3157	24.7582	23.9341	30.1884	21.9746	32.4682	4.37382	4.27751	4.13513	5.21569	3.79658	5.60957
ATP5EP2	368	0.294483	-0.50932	0.323616	0.541457	0	0.64271	0.836295	0.553637	0.871379	0.582881	0.464463	1.7465	2.27254	1.50445	2.36788	1.58392	1.26213
BCL7B	2065	0.294302	6.86566	0.0154475	0.0776837	0	96.1923	119.298	127.23	129.313	90.8518	136.707	46.5822	57.7716	61.6126	62.6211	43.996	66.202
TSSC2	1477	0.294169	0.426243	0.186842	0.389584	0	1.26757	1.63369	1.25633	1.47166	0.990898	1.19433	0.858204	1.10609	0.850596	0.996386	0.670886	0.808622
ARL2BP	2100	0.293977	6.03971	0.00160468	0.0160119	0	60.5576	75.8889	56.8117	69.8652	59.8425	71.5274	28.837	36.1376	27.0532	33.2691	28.4964	34.0606
SYAP1	3525	0.293898	4.84291	0.00372164	0.0292925	0	25.2085	30.8068	26.8088	34.2742	25.2582	29.6151	7.15136	8.73951	7.60533	9.72318	7.16544	8.40144
BRWD1-AS1	691	0.293821	-0.3126	0.384863	0.598943	0	0.535592	1.08913	0.851749	0.426007	0.699458	1.03951	0.775097	1.57616	1.23263	0.616508	1.01224	1.50436
PRPF38B	3756	0.293755	6.26254	0.00317816	0.0261097	0	70.6089	75.9861	68.8639	92.308	67.3811	85.2843	18.799	20.2306	18.3344	24.5762	17.9396	22.7062
SNORD9	103	0.293731	-0.500825	0.291179	0.509714	0	0.64271	0.777949	0.447168	0.677739	0.699458	0.751988	6.23991	7.5529	4.34144	6.57999	6.79085	7.30086
SVBP	798	0.293625	4.4768	0.00910566	0.0541088	0	18.6029	27.8117	20.3994	22.9076	20.9449	22.7145	23.3119	34.8517	25.5631	28.7062	26.2467	28.4642
HIST1H2BC	438	0.293302	9.86306	0.00867333	0.0523895	0	700.322	1036.67	862.204	988.453	948.231	1051.61	1598.91	2366.84	1968.5	2256.74	2164.91	2400.94
BGLAP	743	0.29311	-0.958034	0.365608	0.582986	0	0.46418	0.544564	0.383287	0.658375	0.427446	0.353877	0.624737	0.732926	0.515864	0.886103	0.575298	0.476281
IFIT3	2839	0.293014	1.32881	0.131852	0.314806	0	2.33875	3.36463	2.42748	2.59477	1.90408	2.18961	0.823794	1.18515	0.855049	0.913974	0.670686	0.771262
SS18	3558	0.29299	5.25012	0.00252884	0.022283	0	33.7066	38.7224	34.1977	43.8594	34.6231	43.0403	9.47347	10.8832	9.6115	12.327	9.73107	12.0968
C5orf45	1201	0.29293	3.63693	0.0167937	0.0823358	0	11.8901	12.4861	11.3496	15.4524	10.2004	13.0271	9.9002	10.3964	9.45009	12.8663	8.49327	10.8469
NEIL2	2751	0.292817	3.23216	0.0264292	0.110434	0	8.99795	11.9415	8.30455	9.04297	7.92719	9.93067	3.27079	4.34079	3.01874	3.28716	2.88156	3.60984
AQP1	3172	0.292704	-0.480001	0.267149	0.483395	0	0.589151	0.836295	0.638812	0.735831	0.602311	0.663519	0.185735	0.263649	0.201391	0.231977	0.189884	0.20918
FAM120C	8441	0.292631	5.56953	0.0128212	0.0684531	0	42.8295	47.0075	42.6726	62.8167	42.4726	46.8887	5.07399	5.56895	5.0554	7.44186	5.0317	5.55487
TARP	1027	0.292598	-0.429697	0.279636	0.497375	0	0.767682	0.797397	0.532343	0.832651	0.582881	0.685636	0.747499	0.776434	0.518348	0.81076	0.567557	0.667611
BTG1	4680	0.292591	5.53866	0.00191699	0.0182187	0	42.3832	51.2474	43.2901	49.533	39.5971	52.6613	9.05624	10.9503	9.25003	10.584	8.46091	11.2524
SMIM7	1979	0.292492	5.6648	0.00297925	0.0251123	0	47.2928	57.471	45.5899	50.8885	43.8327	59.1195	23.8973	29.0404	23.0368	25.7143	22.1489	29.8734
KDM4A-AS1	1560	0.292478	1.46118	0.085478	0.237828	0	2.41016	2.85896	2.81077	3.21442	2.1178	2.89737	1.54498	1.83267	1.80178	2.06052	1.35757	1.85729
UBL3	4346	0.292358	5.40436	0.00510212	0.0364709	0	36.7416	42.6316	35.9012	46.7446	41.4817	50.4274	8.45412	9.80938	8.26075	10.7558	9.5448	11.6032
ZNF740	4256	0.292323	6.66363	0.00230184	0.0209154	0	92.1397	121.36	93.4794	103.094	87.7236	110.277	21.6494	28.515	21.9642	24.2232	20.6118	25.9109
STAT4	3089	0.292323	-0.0589678	0.232435	0.445657	0	0.767682	0.91409	0.830455	0.910106	0.893751	1.23857	0.248521	0.295918	0.268843	0.294628	0.289334	0.400961
LOC100996579	2377	0.29216	4.72007	0.00776052	0.0484265	0	25.2799	30.0677	22.0603	25.5798	23.6261	31.3181	10.6352	12.6494	9.28073	10.7614	9.93947	13.1755
LMBRD2	3237	0.291949	5.05268	0.013745	0.0717504	0	28.6185	30.1066	29.364	38.3407	31.4562	41.0939	8.84105	9.30078	9.07138	11.8445	9.71769	12.6951
C8G	877	0.291927	-0.469974	0.356636	0.574631	0	0.357061	0.797397	0.873043	0.755195	0.641169	0.707754	0.40714	0.909233	0.995488	0.861111	0.731094	0.807017
LINC01096	1749	0.291869	2.18397	0.0670814	0.201964	0	3.83841	4.10368	4.47168	5.80919	3.86645	4.97639	2.19463	2.3463	2.55671	3.32144	2.21066	2.84528
GRIK5	4301	0.291844	0.822306	0.175176	0.375409	0	1.60678	1.67259	1.23504	2.32368	1.80693	1.70303	0.373582	0.388884	0.287151	0.540264	0.420119	0.395962
NEK7	4132	0.291805	8.57867	0.0223242	0.0992962	0	349.724	332.748	313.912	433.075	367.623	496.732	84.6379	80.5295	75.971	104.81	88.9698	120.216
MYO5A	12224	0.291778	6.22563	0.00249137	0.0220764	0	70.2518	76.0056	65.4356	83.0327	66.0793	88.0047	5.74704	6.21773	5.35304	6.7926	5.4057	7.19934
HIST1H3F	466	0.291765	8.13331	0.00549902	0.0381731	0	219.843	336.618	270.515	292.957	267.057	297.522	471.765	722.357	580.505	628.664	573.083	638.459
EMC10	2211	0.29169	6.26654	0.00623014	0.0415901	0	63.7355	94.229	69.0768	83.8072	74.8031	76.0393	28.8265	42.6183	31.2424	37.9047	33.8322	34.3914
MIR6837	64	0.291448	-2.05381	0.577937	0.750387	0	0.196384	0.252833	0.0638812	0.29046	0.272011	0.110587	3.0685	3.95052	0.998143	4.53843	4.25018	1.72791
ZNF705E	3441	0.291262	-1.27298	0.432683	0.641026	0	0.249943	0.350077	0.383287	0.309823	0.388588	0.597167	0.0726367	0.101737	0.111388	0.0900388	0.112929	0.173545
PPEF1	2872	0.291254	0.443153	0.253394	0.468426	0	1.24971	0.91409	1.12857	1.76212	1.18519	1.70303	0.435137	0.318276	0.392955	0.613552	0.412671	0.592978
SQSTM1	3336	0.291245	6.10662	0.00176261	0.0171362	0	59.4686	79.2535	62.4758	75.4614	63.9032	72.6774	17.8263	23.757	18.7278	22.6203	19.1556	21.7858
LINC00479	2033	0.291162	-0.86032	0.399352	0.611935	0	0.482033	0.777949	0.404581	0.580919	0.485734	0.309642	0.237104	0.38266	0.199007	0.285745	0.238925	0.152308
C22orf46	4975	0.290973	4.87726	0.00422479	0.0320445	0	25.1728	31.468	28.5975	34.3129	25.4719	31.119	5.05986	6.32523	5.74824	6.89708	5.11998	6.25508
LOC100507373	2887	0.290912	3.29684	0.0270203	0.111886	0	9.24789	11.008	9.90158	10.96	7.28602	10.3509	3.20329	3.81295	3.42971	3.79633	2.52373	3.58535
PROB1	3251	0.290854	2.50059	0.0714178	0.210753	0	4.92745	5.81517	5.81319	7.45513	4.44933	5.26392	1.51567	1.78873	1.78812	2.29318	1.3686	1.61917
GSK3B	7118	0.290788	8.01552	0.000779448	0.00944159	0	231.697	277.572	234.444	289.956	232.103	286.64	32.5509	38.9958	32.9368	40.7356	32.6079	40.2698
DZANK1	3500	0.290588	2.61863	0.0290922	0.117729	0	5.83795	6.28193	5.66413	6.89357	4.97392	6.98907	1.66799	1.79484	1.61832	1.96959	1.42112	1.99688
C10orf111	1714	0.290227	-0.56646	0.393904	0.607088	0	0.767682	0.777949	0.298112	0.793923	0.62174	0.508698	0.447889	0.453879	0.173928	0.463199	0.362742	0.29679
SNORD88B	97	0.290033	0.789664	0.245602	0.460242	0	1.69604	1.88653	1.46927	2.49795	1.37949	1.1501	17.485	19.4487	15.1471	25.7521	14.2215	11.8567
GAL3ST4	2540	0.289883	4.21736	0.0059501	0.0402709	0	16.9069	19.1959	16.9924	22.2105	16.2235	19.8613	6.65624	7.55743	6.68992	8.74428	6.38722	7.81942
JHDM1D-AS1	2380	0.289718	1.85176	0.103149	0.268826	0	3.05287	4.39541	3.66252	3.02078	2.95327	4.40134	1.28272	1.84681	1.53887	1.26923	1.24087	1.8493
XXYLT1	2875	0.289553	3.76752	0.0116523	0.0642275	0	11.4617	16.0841	13.0105	15.2007	12.2211	13.5137	3.98667	5.59447	4.52538	5.2872	4.25081	4.70041
PDZD4	4191	0.289155	6.46986	0.00623526	0.0416059	0	79.1962	110.449	84.6	94.7479	75.4831	87.12	18.8967	26.3539	20.1861	22.6075	18.0108	20.7874
SMURF2	3866	0.288866	5.56982	0.00150944	0.0152831	0	42.4903	51.3446	43.205	52.2246	42.492	53.0373	10.9908	13.2811	11.1756	13.5087	10.9912	13.7189
ACADSB	5941	0.288835	5.35333	0.00697191	0.0448995	0	38.9018	39.5392	35.305	45.3698	36.0804	49.8966	6.54803	6.65532	5.9426	7.63672	6.07311	8.39869
ASCL4	2260	0.288835	0.123018	0.280457	0.498426	0	1.12474	1.40031	0.660105	0.871379	1.02976	1.19433	0.497674	0.619605	0.292082	0.385566	0.455645	0.528466
STK3	3338	0.288554	4.97443	0.0149289	0.0759585	0	27.0295	29.2314	26.3829	36.3849	31.3979	38.0196	8.09753	8.75717	7.90381	10.9002	9.40619	11.3899
ZBTB3	2974	0.288307	4.21582	0.0085185	0.0518412	0	16.3177	22.0937	17.8654	20.5452	15.9321	18.5122	5.48679	7.42896	6.00721	6.90826	5.35712	6.22467
INPP4A	6998	0.288204	8.09773	0.000987994	0.0112182	0	250.371	288.794	244.516	310.869	245.024	303.87	35.7776	41.2681	34.9408	44.4226	35.0134	43.4223
CIC	8334	0.28798	7.68501	0.00523399	0.0370464	0	175.781	246.435	190.174	237.092	189.922	195.075	21.0921	29.5698	22.8191	28.4488	22.7888	23.4071
KIFC2	3266	0.287922	5.54188	0.00718091	0.0458555	0	40.4551	50.1388	45.3556	57.298	39.9857	46.0703	12.3867	15.3517	13.8872	17.5438	12.243	14.106
PSMA8	1899	0.287674	2.58085	0.0400643	0.144256	0	5.49875	5.64013	4.96144	7.12594	5.59566	6.85636	2.8956	2.97005	2.61266	3.75247	2.94664	3.61051
SLC12A2	6926	0.28756	6.13306	0.00383926	0.0300166	0	62.7357	69.3152	61.986	77.9593	64.8164	84.1121	9.058	10.008	8.94976	11.256	9.35842	12.1444
CASS4	3258	0.287464	-1.17498	0.382741	0.596622	0	0.303502	0.544564	0.404581	0.387279	0.388588	0.398111	0.093156	0.167147	0.124181	0.11887	0.119272	0.122195
MYL6	809	0.287462	6.81384	0.0122697	0.0665409	0	87.3015	140.089	103.913	117.481	112.729	113.307	107.913	173.163	128.447	145.218	139.344	140.058
HIST1H2BJ	481	0.287455	7.81883	0.018309	0.0871545	0	162.195	267.303	230.313	247.104	217.59	230.064	337.204	555.724	478.821	513.729	452.369	478.304
CEP112	4102	0.287364	3.38912	0.0528419	0.172623	0	9.60495	9.23814	8.1555	11.599	10.4336	13.6464	2.34153	2.25211	1.98818	2.82765	2.54353	3.32676
ZNF547	2862	0.287286	2.77823	0.0434554	0.152745	0	5.83795	6.18469	6.23906	8.50078	6.37284	7.82952	2.03982	2.16097	2.17997	2.97022	2.22671	2.73568
SLC22A13	2560	0.287044	0.464959	0.17825	0.379824	0	1.21401	1.63369	1.04339	1.41357	1.36006	1.37127	0.474222	0.638161	0.407575	0.552176	0.531272	0.535653
GGPS1	2969	0.286957	5.17372	0.0041103	0.0315334	0	31.6356	38.9363	31.8767	36.8496	33.9431	43.1509	10.6553	13.1143	10.7365	12.4115	11.4325	14.5338
MEF2BNB	2130	0.286927	3.31481	0.0153369	0.0774199	0	8.81942	10.8913	9.19889	11.8701	8.78208	9.90855	4.14057	5.11328	4.31873	5.57282	4.12304	4.6519
LHX4-AS1	2657	0.286818	3.8362	0.0263314	0.110208	0	12.6935	14.1392	12.2226	18.783	13.5811	14.0224	4.77739	5.3215	4.60015	7.06927	5.11145	5.27752
MIR1289-1	144	0.28638	-1.46209	0.483055	0.681725	0	0.357061	0.330628	0.298112	0.522827	0.213723	0.199056	2.47959	2.29603	2.07022	3.63074	1.48419	1.38233
LOC100506730	2490	0.286019	3.64997	0.00775322	0.0484265	0	11.4974	13.9058	11.5625	13.7097	10.7833	13.6464	4.61742	5.58467	4.64357	5.5059	4.33064	5.48047
HOTTIP	4665	0.286015	-0.121995	0.268494	0.48496	0	0.731976	0.894641	0.958218	1.1812	0.699458	0.81834	0.156908	0.191777	0.205406	0.253205	0.149937	0.175421
DMPK	3705	0.28586	4.86786	0.00885084	0.0530326	0	24.548	32.81	28.5549	34.8358	25.7828	28.4428	6.62563	8.8556	7.70712	9.40237	6.95892	7.67688
ZNF497	3562	0.28548	3.35378	0.0170682	0.0832362	0	8.4088	10.4829	9.53959	12.1412	9.61754	10.9481	2.36069	2.94297	2.67815	3.40854	2.70004	3.07357
AFAP1	7770	0.285409	5.5122	0.00259702	0.0227777	0	41.5441	53.2311	42.2255	48.468	39.5582	48.5917	5.34673	6.85085	5.43442	6.23784	5.09115	6.25376
LRRIQ3	2862	0.285342	0.950579	0.163179	0.358734	0	1.80316	1.73094	1.3415	2.26558	1.96237	2.25596	0.630035	0.604799	0.46873	0.791609	0.685663	0.788248
MYCN	3038	0.285258	5.04613	0.0114054	0.0632349	0	26.8867	36.3302	34.3894	38.5924	28.0366	33.8174	8.85014	11.9586	11.3197	12.7032	9.22863	11.1315
PQLC1	2544	0.285204	5.53663	0.00750496	0.047346	0	40.9192	56.129	40.6497	52.5151	43.8715	44.1682	16.0846	22.0633	15.9787	20.6427	17.2451	17.3617
SLC25A46	4874	0.285202	6.18578	0.0154445	0.0776837	0	70.2518	67.7593	59.2391	79.7989	67.2451	92.2955	14.4136	13.9022	12.1541	16.3724	13.7967	18.9363
TAF10	817	0.285063	6.23623	0.0253611	0.107823	0	62.5214	99.4607	69.9925	82.0064	71.3058	66.7721	76.5256	121.739	85.6701	100.375	87.2776	81.7284
PI16	2332	0.284959	3.37472	0.0277751	0.113798	0	8.62303	11.8054	10.2849	12.4898	9.07352	9.73161	3.6977	5.06234	4.41032	5.35581	3.89087	4.17308
ETS1	5541	0.284947	8.79457	0.00185174	0.0177745	0	398.766	456.967	403.175	526.506	398.982	479.68	71.9665	82.4701	72.7622	95.0201	72.0055	86.5692
FAM27E3	1507	0.284835	0.507698	0.197519	0.403319	0	1.35683	1.18637	1.25633	1.72339	1.1269	1.6588	0.900354	0.787241	0.833663	1.14359	0.74778	1.10073
TTC34	3550	0.284819	1.63674	0.0916944	0.24882	0	2.51728	3.92864	3.10888	3.17569	2.70068	3.00795	0.709094	1.10666	0.875742	0.894561	0.760756	0.847311
LOC100294362	3698	0.284702	0.0836053	0.248705	0.463305	0	0.8748	1.05023	0.873043	1.41357	1.01033	0.884692	0.23656	0.284	0.236085	0.382252	0.273209	0.239235
APOBEC3F	5031	0.284398	4.34441	0.00505377	0.0362107	0	18.8171	23.7858	17.8654	21.4553	18.1665	21.5644	3.74024	4.72784	3.55107	4.26461	3.61091	4.2863
UXT	842	0.284025	6.31258	0.00360277	0.0286229	0	64.7709	91.1172	76.2954	86.2858	73.9288	84.3112	76.9251	108.215	90.6121	102.477	87.8014	100.132
NXF1	4147	0.283565	6.87442	0.00232798	0.0210417	0	105.833	127.428	103.743	139.575	107.833	119.323	25.5204	30.7277	25.0164	33.657	26.0027	28.7733
ZFP2	2405	0.283541	0.198305	0.382322	0.596266	0	1.10689	0.544564	0.936924	1.68467	0.952039	1.43762	0.460245	0.22643	0.389573	0.700484	0.395858	0.597765
PCMTD2	6440	0.283439	6.28006	0.00229144	0.0208844	0	73.0369	84.2713	68.2038	81.2318	68.9549	90.3713	11.3411	13.0856	10.5907	12.6136	10.7073	14.0328
KLF12	10909	0.283367	7.27935	0.00843235	0.0514397	0	148.645	144.115	134.832	178.226	136.822	189.258	13.6259	13.2106	12.3597	16.3375	12.5421	17.3488
RNU5A-1	117	0.283179	4.37449	0.477356	0.676919	0	15.3536	30.34	24.9349	24.2243	15.8544	13.4916	131.228	259.316	213.119	207.045	135.507	115.312
ALPK1	5412	0.283153	4.81055	0.00661313	0.0434762	0	25.7441	28.1228	23.3166	32.5896	26.7737	31.6056	4.75686	5.19639	4.30832	6.02172	4.9471	5.83992
AHDC1	6358	0.283073	6.83619	0.00966745	0.0564506	0	97.442	126.125	100.208	142.054	111.525	107.955	15.3259	19.8372	15.761	22.3426	17.5408	16.9793
RAB3IP	10222	0.283044	5.83481	0.018675	0.08848	0	54.1484	50.3527	50.4661	70.9108	49.7586	66.6173	5.29724	4.92592	4.93701	6.93708	4.8678	6.51705
CHTOP	2166	0.282991	6.94391	0.00124878	0.0132316	0	107.386	137.736	110.11	134.444	115.663	133.168	49.5781	63.5899	50.8356	62.0702	53.3994	61.4812
FNBP1L	5517	0.282861	6.30074	0.00678112	0.0441134	0	70.7339	76.1612	66.479	89.3066	76.066	94.0649	12.8211	13.8048	12.0498	16.1875	13.7876	17.05
C1orf123	1566	0.282848	5.15952	0.00444405	0.0331923	0	29.7968	41.5425	32.5794	38.0115	34.2928	38.0196	19.0273	26.5277	20.8042	24.273	21.8984	24.2782
SMIM10L2A	3456	0.282681	2.84271	0.0345742	0.131417	0	5.62372	8.24626	7.23987	7.86177	6.48941	7.38718	1.62723	2.38607	2.09487	2.27482	1.87772	2.13749
ADGRF3	5399	0.282674	2.09075	0.0980126	0.259759	0	3.99909	4.31761	4.47168	5.28636	2.97269	4.29076	0.740709	0.799706	0.828243	0.979137	0.550601	0.794732
CAAP1	2969	0.282563	4.53178	0.00330461	0.0268968	0	20.9059	24.7971	20.6123	25.2119	21.0032	26.0542	7.04141	8.35201	6.94251	8.49171	7.07415	8.77541
PCYOX1	5377	0.282362	5.73102	0.00299103	0.0251416	0	48.5246	53.5229	47.5915	60.3768	47.5825	60.8889	9.02448	9.95404	8.85093	11.2287	8.84927	11.324
ZFYVE16	7818	0.282227	5.66761	0.0458908	0.157979	0	52.1845	43.4484	41.4163	56.7752	43.8715	67.1039	6.67492	5.55749	5.29756	7.26211	5.61161	8.58326
ZBTB1	5668	0.282074	6.72189	0.00327139	0.026655	0	97.6741	104.829	93.1387	116.823	94.8931	125.803	17.2326	18.4948	16.4324	20.6109	16.7419	22.1953
ZNF425	3218	0.281862	1.50945	0.11541	0.287567	0	2.91005	3.38408	2.00161	3.05951	2.66182	2.78678	0.904304	1.05161	0.622004	0.950748	0.827167	0.865997
CNOT7	3560	0.281734	7.12262	0.00415157	0.0317115	0	130.506	139.72	119.33	148.405	127.418	170.569	36.659	39.2471	33.5197	41.6869	35.7915	47.9125
PMEPA1	5517	0.281613	8.6728	0.0018367	0.0176638	0	356.865	475.19	369.574	447.056	378.679	421.047	64.6846	86.132	66.9882	81.0324	68.6385	76.3181
RB1	4772	0.281559	9.32752	0.0033844	0.0273552	0	591.972	634.728	584.598	717.551	563.296	762.582	124.051	133.011	122.506	150.367	118.042	159.804
ATOX1	489	0.281506	3.57653	0.0213928	0.0966994	0	9.40857	14.2754	11.6051	12.5672	11.2302	12.2972	19.2404	29.193	23.7323	25.6998	22.9656	25.1477
C16orf87	1383	0.281463	4.96832	0.0154716	0.077753	0	29.3147	30.4372	28.0438	31.9118	27.3177	40.6516	21.1965	22.0081	20.2775	23.0743	19.7525	29.3938
WFS1	3640	0.281454	4.25635	0.0108504	0.0610516	0	15.7643	22.6189	17.1627	20.7969	18.7493	19.3526	4.33084	6.21397	4.71504	5.71343	5.15092	5.31666
MIR6759	65	0.281327	-1.93883	0.515398	0.705279	0	0.285649	0.213936	0.127762	0.251732	0.174864	0.265408	4.3946	3.29132	1.96557	3.87279	2.69022	4.08319
HGH1	2531	0.280811	5.03682	0.0186321	0.0883042	0	27.4759	38.2556	28.2142	39.3282	33.1465	30.2786	10.8557	15.1148	11.1474	15.5386	13.0962	11.9631
ZBTB42	3531	0.280755	4.13837	0.0136726	0.0714628	0	15.8178	21.6075	16.5878	19.2091	15.2132	16.9861	4.4797	6.11938	4.69777	5.44012	4.30847	4.81056
SNORA64	134	0.280586	1.06116	0.225754	0.439007	0	1.89243	2.93676	2.00161	2.32368	1.6515	1.43762	14.1226	21.9161	14.9374	17.3409	12.3246	10.7285
DRICH1	1300	0.280581	-1.11017	0.398711	0.611453	0	0.339208	0.427872	0.511049	0.426007	0.31087	0.552933	0.260929	0.329132	0.393115	0.327698	0.239131	0.425333
MIR3609	80	0.2805	4.0668	0.117111	0.29042	0	12.1044	21.2185	18.3126	20.2353	14.9606	13.4916	151.305	265.232	228.908	252.942	187.008	168.644
MZF1	2921	0.280206	4.68577	0.00494507	0.0357021	0	22.727	29.0175	23.5083	29.6462	23.4124	25.8772	7.78054	9.93409	8.04802	10.1493	8.0152	8.85904
SNORD4A	72	0.280153	0.803813	0.179562	0.381427	0	1.37469	2.2366	1.80997	1.82021	1.4572	1.54821	19.0929	31.0639	25.1384	25.2807	20.2389	21.5029
DLC1	8597	0.280126	1.38047	0.0929938	0.251218	0	2.21378	3.01455	2.15067	2.78841	2.58411	2.63196	0.257506	0.350651	0.250165	0.324347	0.300582	0.306149
DNLZ	750	0.280103	1.73595	0.108527	0.27759	0	2.85649	4.12313	2.87465	3.91152	3.18642	2.76466	3.80865	5.4975	3.83287	5.21536	4.24856	3.68622
HIGD2A	611	0.28008	5.62774	0.00474774	0.0347714	0	40.8657	57.4515	46.1435	54.3353	46.9025	50.7592	66.8833	94.0286	75.5213	88.9285	76.7635	83.0756
HIST1H2BH	425	0.279744	7.35373	0.00926757	0.0547353	0	125.793	194.643	157.339	173.521	160.098	169.817	295.983	457.983	370.21	408.284	376.701	399.569
STRADB	2322	0.279669	5.09815	0.00387508	0.0302556	0	31.7428	36.797	29.577	35.7265	31.3979	40.0765	13.6704	15.8471	12.7377	15.3861	13.5219	17.2595
PTPRA	3975	0.27947	6.9578	0.00126408	0.0133271	0	109.404	136.141	116.498	135.315	110.942	137.371	27.5229	34.2493	29.3077	34.0416	27.9099	34.5586
HIST1H4E	377	0.279407	8.49292	0.14246	0.330738	0	249.604	487.832	361.269	369.677	365.583	327.425	662.079	1293.98	958.274	980.577	969.717	868.5
GPR75	2159	0.279402	1.65598	0.105063	0.272041	0	3.08858	2.80061	2.68301	3.44679	2.66182	4.02535	1.43056	1.29718	1.24271	1.59647	1.2329	1.86445
RHPN2	3531	0.279376	2.34959	0.0390199	0.141973	0	4.42756	5.44564	4.81238	5.24764	4.48819	5.97167	1.25391	1.54224	1.36289	1.48616	1.27108	1.69121
ZNF333	6357	0.279271	3.86514	0.0133544	0.0704315	0	13.4255	16.1619	14.352	15.4718	11.6382	16.1899	2.11193	2.54238	2.25766	2.43382	1.83077	2.54678
TAF3	3298	0.279087	5.65125	0.00249229	0.0220764	0	44.1328	55.3121	45.1853	57.1818	46.8248	52.6834	13.3817	16.7714	13.7008	17.3383	14.1979	15.9744
CCDC71L	4424	0.279079	5.50209	0.00272122	0.0234996	0	39.1875	50.3138	40.7349	50.6561	42.8418	47.9724	8.85793	11.3729	9.20771	11.4503	9.68395	10.8437
ZMYM4	6994	0.279033	7.17008	0.0185552	0.0879947	0	129.703	127.759	122.673	183.144	137.91	162.695	18.5448	18.2669	17.5398	26.1859	19.7183	23.2621
ENKD1	1538	0.278706	4.11926	0.0334973	0.128974	0	14.0504	20.285	14.6501	20.5839	18.3219	16.1235	9.13548	13.1892	9.52541	13.3835	11.9128	10.4834
BBS2	2814	0.278624	5.74335	0.0056253	0.0388893	0	49.7744	52.8811	45.5899	59.5442	49.7586	63.6757	17.6881	18.7921	16.2011	21.16	17.6825	22.6282
SPATA6	5008	0.278621	3.16697	0.0275111	0.113168	0	8.08744	8.53799	8.56008	10.6115	7.61632	10.2845	1.6149	1.70487	1.70928	2.1189	1.52083	2.05362
CUL1	3209	0.278508	6.25535	0.00594204	0.0402343	0	69.8412	76.9002	62.6887	89.0936	74.4728	85.1295	21.7642	23.9639	19.5353	27.7637	23.2075	26.5284
TIMP3	5486	0.278461	0.0806522	0.220134	0.432529	0	0.839094	1.18637	0.91563	1.14247	1.01033	1.0174	0.152952	0.216254	0.166903	0.208253	0.184165	0.185453
ZRANB3	7058	0.278418	4.45663	0.00505054	0.0362047	0	19.7633	22.5216	20.2716	24.7665	19.4099	24.8156	2.80013	3.19093	2.87215	3.509	2.75006	3.51596
ACTR10	2441	0.278387	5.03422	0.00519463	0.0368641	0	27.9579	34.1714	28.9169	35.4748	31.8836	38.0196	11.4535	13.9989	11.8463	14.5329	13.0617	15.5754
USP20	4619	0.277968	7.42874	0.00211152	0.0197062	0	153.34	196.627	159.085	196.021	154.736	173.731	33.1977	42.5691	34.4415	42.4381	33.4998	37.6123
CCDC142	4339	0.277834	4.85773	0.00669614	0.0437938	0	26.726	32.1098	25.8293	34.5647	25.9771	28.5092	6.15949	7.40028	5.95282	7.96605	5.98688	6.57045
PMF1	1234	0.277751	4.38424	0.022742	0.100565	0	17.621	27.0726	20.0587	20.216	18.8854	21.2326	14.2796	21.9389	16.255	16.3825	15.3042	17.2063
RORC	3214	0.277287	3.43395	0.0380202	0.139881	0	9.87275	14.2365	9.88029	10.9213	9.46211	10.2182	3.07179	4.42951	3.07414	3.39803	2.94403	3.17928
CDK9	2472	0.277267	6.62649	0.00296944	0.0250575	0	91.854	117.49	89.1142	105.398	86.9465	101.784	37.1578	47.5282	36.0494	42.6368	35.1725	41.1747
WDR13	2804	0.277056	4.84232	0.00667826	0.0437146	0	24.1195	33.6852	27.6393	31.0792	25.9965	29.3939	8.60182	12.0133	9.85708	11.0839	9.27122	10.4828
SNORD4B	74	0.276967	-1.61334	0.526808	0.714438	0	0.285649	0.369526	0.3407	0.406643	0.155435	0.154821	3.86012	4.99359	4.60405	5.49518	2.10047	2.09218
VASH1	6030	0.276908	5.73305	0.00500145	0.035972	0	50.3457	59.5325	47.2934	62.4682	46.5528	52.6834	8.3492	9.87272	7.84301	10.3596	7.7202	8.73688
CDC42SE2	3656	0.276805	7.35069	0.00545323	0.0379596	0	150.912	180.056	141.561	157.72	150.247	198.658	41.2779	49.2495	38.7201	43.1399	41.0961	54.3374
RAB3B	12844	0.276785	3.53959	0.0212965	0.0966068	0	10.9261	11.4164	10.7107	14.2519	9.81183	12.4299	0.850676	0.88885	0.83391	1.10961	0.763924	0.967761
CD99L2	3745	0.276633	5.46316	0.00782378	0.0487312	0	37.7414	54.3397	40.5645	46.3573	41.3069	44.1461	10.0778	14.5099	10.8317	12.3785	11.0299	11.788
SEC22B	1884	0.276429	5.55892	0.00314434	0.0259476	0	41.2763	51.1696	41.7996	49.6105	44.7459	54.0547	21.9089	27.1601	22.1866	26.3325	23.7505	28.6914
SMAD3	6623	0.276427	5.16028	0.00474959	0.0347714	0	30.8322	42.0481	34.07	37.6823	32.0585	37.6658	4.65533	6.3488	5.14419	5.68961	4.84048	5.68712
FIBP	1450	0.276366	5.77026	0.00947543	0.0556296	0	48.7924	67.8955	48.9117	59.2925	50.3027	52.0199	33.65	46.8245	33.7322	40.8914	34.6915	35.8758
SYT11	5280	0.276357	-0.339073	0.27526	0.492367	0	0.660564	0.739051	0.723987	0.813287	0.660599	0.928927	0.125107	0.139972	0.137119	0.154032	0.125113	0.175933
SCGB1B2P	602	0.276269	-0.892441	0.374307	0.589936	0	0.517739	0.60291	0.425874	0.406643	0.408017	0.641402	0.860032	1.00151	0.707433	0.675487	0.677769	1.06545
ZNF582	2297	0.276145	-1.78452	0.57799	0.750392	0	0.249943	0.252833	0.17035	0.464735	0.252582	0.0884692	0.108813	0.110071	0.0741619	0.202323	0.109962	0.0385151
SFPQ	3073	0.276042	9.23608	0.00376454	0.0295754	0	530.272	614.035	537.496	726.4	568.678	641.07	172.558	199.816	174.909	236.382	185.056	208.614
LOC100128494	4233	0.275961	1.85152	0.152165	0.343699	0	2.66011	4.18147	4.30133	4.22134	2.7784	3.3176	0.628421	0.987827	1.01614	0.997247	0.656367	0.783746
PSPN	471	0.275821	0.509482	0.282571	0.500599	0	1.53536	1.22527	0.830455	1.89767	1.36006	1.41551	3.2598	2.60142	1.76317	4.02902	2.88759	3.00532
SERHL	1357	0.27574	-1.68719	0.563415	0.740224	0	0.23209	0.136141	0.127762	0.406643	0.369158	0.353877	0.171032	0.100325	0.0941506	0.299663	0.27204	0.260779
HIST1H2BD	861	0.27574	9.0117	0.0075763	0.0476571	0	419.833	624.537	472.103	523.795	508.972	547.58	487.611	725.363	548.32	608.357	591.14	635.982
PLXNA3	6752	0.275596	5.63337	0.0135801	0.071102	0	46.8465	50.8	44.3761	63.7462	43.4052	48.3927	6.93816	7.5237	6.57229	9.44108	6.4285	7.16716
TMEM164	5708	0.27555	6.69333	0.00312654	0.0258361	0	91.6755	118.579	94.7571	118.294	94.3879	103	16.0609	20.7741	16.6007	20.7243	16.5361	18.0449
PNPLA2	2427	0.275412	6.32489	0.0149665	0.0760477	0	68.288	102.65	76.2741	85.0272	72.9767	75.5306	28.1368	42.2951	31.4273	35.0339	30.0687	31.121
SATB2	6337	0.275394	5.76198	0.00365849	0.0289374	0	47.1678	56.2846	49.1672	63.6687	50.8855	58.2127	7.44324	8.8819	7.75875	10.0471	8.02991	9.18617
SIRT1	4313	0.275235	5.76546	0.00489297	0.0354237	0	50.8991	55.7595	47.9535	57.2786	48.7094	65.5999	11.8013	12.9282	11.1184	13.2805	11.2936	15.2098
AP3M2	3670	0.275206	5.55635	0.00607329	0.0409217	0	42.9545	46.6769	39.798	54.7807	44.8819	53.0373	11.7042	12.7185	10.8441	14.9266	12.2294	14.4516
TTC23	4228	0.275087	1.89411	0.0863305	0.239081	0	3.32067	3.88974	2.74689	4.06643	3.9053	4.13594	0.7854	0.919996	0.64969	0.961786	0.923677	0.978225
GPR21	1595	0.274987	0.927383	0.207117	0.415854	0	1.78531	1.45865	1.74609	2.11067	1.53492	2.58772	1.11931	0.914516	1.09472	1.32331	0.962333	1.6224
PLEKHO1	2807	0.274747	6.06148	0.014731	0.0754327	0	57.719	82.6181	63.8812	75.3839	59.6676	61.1986	20.5625	29.4329	22.7578	26.8557	21.2567	21.8021
RNF215	1920	0.274556	3.74043	0.0121413	0.0660104	0	11.908	14.392	11.7115	15.7042	12.5708	13.6685	6.20208	7.49586	6.09976	8.17926	6.54729	7.11901
BIRC2	4265	0.2744	6.56008	0.0089847	0.0536003	0	87.73	92.1091	78.1906	102.048	90.1912	115.696	20.5697	21.5965	18.3331	23.9269	21.1468	27.1268
FAM213B	5962	0.274395	4.84186	0.0209382	0.0954359	0	22.4949	31.7598	26.6597	34.797	28.6583	27.4697	3.77304	5.32703	4.47161	5.83647	4.80683	4.60746
ZNF33A	6472	0.274347	6.82718	0.0258693	0.1092	0	116.241	104.673	103.062	125.672	88.9283	142.546	17.9607	16.1732	15.9242	19.4178	13.7405	22.025
RNVU1-6	164	0.274177	-0.967433	0.423245	0.6338	0	0.428474	0.700154	0.3407	0.503463	0.505164	0.33176	2.61264	4.26923	2.07744	3.0699	3.08027	2.02292
LMBR1	4890	0.274175	6.21256	0.00280075	0.0239678	0	66.9669	76.8224	67.9909	80.3411	66.3513	86.3017	13.6947	15.7101	13.9041	16.4297	13.5688	17.6486
RNU2-2P	138	0.273923	8.97226	0.0835279	0.234436	0	366.381	632.239	537.709	578.305	460.049	438.608	2654.93	4581.44	3896.44	4190.62	3333.69	3178.32
COLEC11	2396	0.27392	-0.0941408	0.319257	0.537969	0	0.946213	0.7585	0.660105	1.31675	0.816034	0.862575	0.394913	0.316569	0.275503	0.549562	0.340582	0.360006
B4GALT6	4814	0.273906	6.10313	0.015782	0.0788164	0	62.7178	61.6913	60.4103	80.8639	63.4758	83.1168	13.0282	12.815	12.5489	16.7977	13.1857	17.2656
CPEB4	8583	0.273808	5.08957	0.00643532	0.0425844	0	33.171	34.9882	30.3648	36.9271	28.8332	39.8111	3.86473	4.07646	3.53779	4.30235	3.35934	4.63837
KCND1	4720	0.273804	2.69459	0.0467713	0.16006	0	6.01648	6.24304	6.04742	8.05541	5.4208	6.83425	1.27468	1.32268	1.28123	1.70665	1.14847	1.44793
EIF4E2	3891	0.273679	5.84047	0.00293322	0.0248379	0	50.9884	63.1889	49.5292	61.713	55.024	63.1449	13.1042	16.2398	12.7292	15.8604	14.1413	16.2284
ACTR8	3629	0.273479	5.53816	0.00296353	0.0250215	0	42.1689	49.8665	40.16	52.1665	43.7938	50.4274	11.62	13.7411	11.0664	14.3749	12.0677	13.8957
PLCD4	3237	0.273433	-0.149373	0.257505	0.472721	0	0.892653	0.991884	0.723987	0.890742	0.718887	0.951044	0.275766	0.306421	0.22366	0.275175	0.222084	0.293804
MIR1282	101	0.273416	-0.505852	0.442261	0.64774	0	0.374914	0.816846	0.873043	0.92947	0.582881	0.420229	3.71202	8.08758	8.64399	9.20268	5.7711	4.16068
CARD9	2123	0.27325	-0.742401	0.397718	0.610555	0	0.410621	0.544564	0.425874	0.793923	0.680028	0.486581	0.193415	0.256507	0.2006	0.373963	0.320315	0.229195
SLED1	751	0.273172	-1.4996	0.45007	0.654851	0	0.321355	0.350077	0.319406	0.29046	0.213723	0.398111	0.427903	0.466148	0.425307	0.386764	0.284585	0.530108
TNFSF10	3064	0.273093	2.69958	0.0611696	0.189768	0	6.60564	6.61256	6.21777	7.26149	4.72134	7.34294	2.15589	2.15815	2.0293	2.36994	1.54091	2.39652
MIR3975	70	0.273017	-1.49997	0.506221	0.699439	0	0.214237	0.330628	0.17035	0.329187	0.466305	0.375994	3.06053	4.72326	2.43357	4.70268	6.6615	5.37134
ELF4	4272	0.27299	5.37931	0.00397362	0.0307397	0	36.331	47.1242	39.436	46.6091	37.2461	42.7749	8.50445	11.031	9.23127	10.9104	8.71866	10.0128
IFT43	1856	0.272974	3.57182	0.0173406	0.0841042	0	9.80133	13.5947	10.9024	13.1675	11.5216	12.1424	5.28089	7.3247	5.87413	7.09456	6.20777	6.54224
RECK	4412	0.272903	4.55164	0.00835053	0.0510639	0	22.477	23.5329	21.3789	26.5093	19.7597	26.8504	5.09452	5.33385	4.84563	6.00845	4.47862	6.08577
SFXN2	2562	0.2728	5.24593	0.00751691	0.0474016	0	33.4745	43.3123	38.1158	41.5357	31.4562	39.59	13.0658	16.9057	14.8773	16.2122	12.278	15.4528
SNORD35A	86	0.272435	0.470883	0.241803	0.456057	0	1.16045	1.76983	1.25633	1.58785	1.24348	1.03951	13.4936	20.5795	14.6085	18.4633	14.4591	12.0874
GDAP1	3889	0.27225	4.25688	0.00875612	0.0526723	0	17.7638	19.896	15.9703	20.8163	18.1082	21.9404	4.5677	5.11598	4.10653	5.3526	4.65626	5.64165
SLC35G5	1201	0.272233	-0.61005	0.408829	0.62004	0	0.589151	0.680705	0.787868	0.600283	0.31087	0.751988	0.490551	0.566782	0.65601	0.499819	0.258843	0.626135
TCAF1	5960	0.272112	5.57041	0.00295827	0.0249911	0	42.8652	51.3641	44.5039	53.9093	41.6954	50.5601	7.19215	8.61813	7.46709	9.04518	6.99588	8.48325
TBC1D20	4469	0.272099	6.41187	0.0027242	0.023512	0	81.3386	94.8319	76.3167	94.9222	73.6568	89.5751	18.2006	21.2199	17.0769	21.2401	16.4817	20.0436
FLCN	4052	0.271914	5.01047	0.00539755	0.0376934	0	29.1005	37.3026	27.5115	34.6034	30.8927	33.751	7.18176	9.20598	6.78961	8.53983	7.62406	8.32947
ZNF862	6897	0.271832	5.67845	0.00546924	0.0380361	0	45.8645	54.6703	44.8446	61.3063	48.3986	51.9535	6.64992	7.92668	6.50204	8.88884	7.01734	7.53277
CRTAP	6651	0.271787	6.62739	0.00241276	0.021523	0	87.1587	114.028	91.9889	107.025	89.5111	103.266	13.1046	17.1445	13.8308	16.0915	13.4583	15.5263
TTC31	2929	0.271739	6.06682	0.00266924	0.0232362	0	58.0225	73.5939	62.6035	74.9579	61.5134	71.3062	19.8097	25.126	21.3737	25.5916	21.0015	24.3449
NR1H2	2090	0.27161	5.72133	0.0133512	0.0704315	0	43.8828	63.9474	50.0828	59.4474	49.3895	49.5649	20.9966	30.5968	23.9631	28.4437	23.6313	23.7152
CEP104	6458	0.27157	6.54651	0.00309187	0.0256899	0	82.7311	97.0296	85.4517	110.278	85.839	99.3067	12.8106	15.0247	13.2319	17.0762	13.2919	15.3773
KCNE1	4136	0.271532	-1.74896	0.487825	0.685598	0	0.178531	0.330628	0.298112	0.251732	0.233153	0.265408	0.0431651	0.0799391	0.0720774	0.0608635	0.0563715	0.0641701
EPC1	4981	0.271475	5.86666	0.00302465	0.0253538	0	52.9879	63.5001	52.3826	60.5318	53.1588	67.3472	10.638	12.7485	10.5165	12.1525	10.6723	13.5208
CD3EAP	3292	0.271273	3.46666	0.0518123	0.170717	0	9.6228	12.9528	10.9876	13.5935	9.36496	9.55467	2.92309	3.93464	3.33766	4.12925	2.84476	2.90239
SNORA52	134	0.271202	1.24477	0.141219	0.328983	0	1.92813	2.93676	2.3849	2.59477	2.04008	2.10114	14.389	21.9161	17.7977	19.364	15.2245	15.6802
HIST1H2AG	498	0.271108	9.55191	0.00881667	0.052967	0	585.759	854.401	709.23	785.732	745.816	822.52	1176.22	1715.67	1424.16	1577.77	1497.62	1651.65
ZNF611	4713	0.271094	5.73731	0.00569169	0.0391668	0	50.8991	55.3899	47.4424	55.5359	46.5916	64.0296	10.7997	11.7526	10.0663	11.7835	9.88577	13.5857
ZNF701	5596	0.271045	0.383523	0.211381	0.42151	0	1.10689	1.36141	1.29892	1.23929	1.04919	1.57033	0.1978	0.243283	0.232115	0.221461	0.187489	0.280616
SNORD12B	103	0.270986	1.61733	0.0984092	0.260322	0	3.21355	3.28683	2.61913	3.25315	2.38981	3.40606	31.1995	31.911	25.4284	31.5839	23.2021	33.0686
LOC101927056	1400	0.270947	-1.55501	0.498995	0.69443	0	0.178531	0.291731	0.255525	0.426007	0.388588	0.265408	0.127522	0.208379	0.182518	0.304291	0.277563	0.189577
SCX	1003	0.270913	1.14212	0.209958	0.419834	0	2.44587	2.11991	1.83126	3.00141	1.59321	1.96844	2.43855	2.11357	1.82578	2.99244	1.58844	1.96255
MYO15B	9540	0.27091	5.85372	0.00683267	0.0442662	0	53.7377	62.4109	55.7044	68.1224	47.7185	59.0532	5.63289	6.54203	5.83903	7.14072	5.00194	6.19006
SCUBE3	7713	0.270749	-2.28724	0.613693	0.776168	0	0.0714123	0.213936	0.212937	0.232368	0.174864	0.0884692	0.00925869	0.027737	0.0276076	0.0301267	0.0226714	0.0114701
ADCY1	12931	0.270716	5.43435	0.00973194	0.0567178	0	39.7945	45.8406	40.2238	53.4445	37.4793	42.421	3.07745	3.54502	3.11065	4.13306	2.8984	3.28056
SLC9A3R2	2363	0.270619	3.03398	0.0522374	0.171524	0	7.12337	10.1133	8.07032	9.27534	6.99458	7.32083	3.01455	4.27987	3.41529	3.92524	2.96004	3.09811
MPDU1	1618	0.270611	5.45755	0.00420408	0.0319675	0	40.098	51.403	38.4565	45.699	40.8405	46.9329	24.7824	31.7694	23.7679	28.2441	25.2414	29.0067
ANO5	6661	0.270607	2.82417	0.0283312	0.115513	0	6.1236	7.37106	6.83529	7.91986	6.2174	7.82952	0.919322	1.1066	1.02617	1.18899	0.933403	1.17543
LOC148413	1748	0.270575	4.64822	0.0148713	0.0758437	0	21.0309	29.2703	23.9129	29.1815	23.1792	23.6434	12.0314	16.745	13.6801	16.6942	13.2604	13.526
KIAA1033	5815	0.270475	6.23343	0.0289173	0.117146	0	75.0543	67.3315	62.71	82.8584	66.7205	96.5863	12.907	11.5789	10.7842	14.2491	11.4739	16.6098
KLRG1	1788	0.270342	0.202041	0.249981	0.465053	0	1.01762	0.952987	0.894336	1.37484	1.10747	1.32704	0.569141	0.532991	0.500188	0.768927	0.619393	0.742191
TAF12	1451	0.270199	4.41782	0.00971676	0.0566512	0	19.1563	21.5103	18.121	24.4761	20.7506	24.0194	13.2022	14.8245	12.4886	16.8684	14.3009	16.5537
DNAJB2	3125	0.270151	4.98223	0.0126685	0.0678297	0	27.101	36.0385	28.2994	37.5274	30.4847	29.9468	8.67231	11.5323	9.05579	12.0088	9.7551	9.58298
MREG	3213	0.270027	3.70545	0.0138681	0.0722095	0	12.4257	13.8475	11.8606	13.671	11.0942	15.1725	3.86733	4.30983	3.69144	4.25489	3.4529	4.72221
NUTM2B	3292	0.270001	-0.111601	0.28598	0.503867	0	0.856947	1.03078	0.958218	0.948834	0.602311	0.928927	0.260312	0.313117	0.291075	0.288224	0.182962	0.282177
KCNH4	3923	0.269896	-0.772749	0.38668	0.600907	0	0.374914	0.661256	0.660105	0.639011	0.466305	0.486581	0.0955683	0.168559	0.168265	0.162888	0.118864	0.124033
METTL23	1317	0.269873	4.38815	0.0104954	0.0596078	0	18.6029	21.2185	17.6738	23.2755	20.5757	24.0857	14.1252	16.1113	13.4197	17.6731	15.6232	18.2883
SUPT4H1	1530	0.269422	6.2373	0.00395585	0.030661	0	64.5388	84.8547	66.7558	80.1087	73.8705	82.3206	42.1822	55.4606	43.6313	52.3586	48.2814	53.8043
TBC1D3F	10395	0.269233	-0.504447	0.362295	0.579543	0	0.482033	0.875192	0.702693	0.522827	0.641169	0.796223	0.0463716	0.0841936	0.0675991	0.050296	0.0616806	0.0765967
API5	3830	0.269213	6.68544	0.00393511	0.0305583	0	93.1752	103.778	88.8587	114.596	97.9046	119.035	24.3277	27.0962	23.2007	29.9206	25.5626	31.0797
ACSF3	4296	0.269151	8.80697	0.00359674	0.0286229	0	397.142	515.255	428.685	502.921	392.765	450.286	92.4445	119.938	99.7871	117.067	91.4257	104.815
CHAC2	1275	0.269143	3.32975	0.0786316	0.224766	0	9.33715	9.04365	7.26116	11.5409	10.6279	12.2972	7.32326	7.09306	5.69503	9.05171	8.33558	9.64488
SNORA23	189	0.269029	2.18369	0.171613	0.37034	0	3.40994	5.91241	4.91885	5.38318	3.96359	3.42818	18.042	31.2826	26.0257	28.4824	20.9714	18.1385
SIK2	5742	0.268916	6.03516	0.00436424	0.0326929	0	56.1658	68.654	58.4513	74.9192	63.7478	71.3283	9.78157	11.9565	10.1796	13.0476	11.102	12.4222
FAM151B	1705	0.268736	-1.74997	0.594664	0.763079	0	0.214237	0.116692	0.298112	0.522827	0.194294	0.199056	0.125652	0.0684412	0.174846	0.306643	0.113955	0.116748
PAQR8	4738	0.268735	5.6876	0.0031043	0.0257366	0	47.7927	58.0739	45.3982	56.8526	46.9608	53.922	10.0871	12.257	9.58173	11.9993	9.91152	11.3807
HOMER1	4312	0.268666	5.12508	0.00573239	0.0392837	0	31.2429	37.9444	30.5991	35.5329	33.0299	40.8507	7.24556	8.79973	7.09626	8.24046	7.66	9.47371
TMEM39B	1818	0.268548	5.33781	0.00529052	0.0372723	0	35.599	47.3187	36.902	44.3628	37.4793	40.7622	19.5814	26.0279	20.2981	24.402	20.6157	22.4214
MIR4746	71	0.268299	-0.929146	0.488149	0.685899	0	0.553445	0.525115	0.596224	0.619647	0.174864	0.442346	7.795	7.39599	8.39752	8.72742	2.46288	6.23023
NDUFA6-AS1	9614	0.268225	2.37996	0.0474559	0.161393	0	4.96315	5.3484	4.72721	6.06092	4.37161	5.52933	0.516242	0.556313	0.4917	0.630427	0.454713	0.575133
FRG1JP	1071	0.268072	-1.06253	0.435808	0.643328	0	0.553445	0.388974	0.298112	0.484099	0.330299	0.57505	0.516755	0.363188	0.278349	0.452007	0.308403	0.536928
MAP3K14-AS1	1633	0.268045	3.93127	0.0105498	0.0598493	0	14.1932	16.3758	14.4371	16.7305	12.804	16.787	8.69148	10.0281	8.84087	10.2452	7.84076	10.2799
ARL13B	3992	0.267983	4.68627	0.0198198	0.0918077	0	23.9767	24.0775	21.7622	28.1358	24.2284	32.1143	6.00618	6.03144	5.45145	7.04806	6.06925	8.04467
CSAD	3026	0.267963	3.78892	0.0217212	0.0977746	0	13.5148	13.9836	12.7549	16.5562	11.2496	14.6417	4.46622	4.62116	4.21512	5.47131	3.71765	4.83862
TPCN1	5467	0.267728	5.03003	0.0158485	0.0790444	0	28.5471	32.4988	31.2805	41.4002	29.0469	33.0432	5.2217	5.94454	5.72169	7.57274	5.31314	6.04413
C14orf132	7857	0.267475	4.79515	0.0051574	0.0367274	0	24.2266	30.4567	26.3403	31.2534	24.9473	29.1506	3.08344	3.87638	3.35247	3.97778	3.17517	3.71014
CATSPER2P1	1635	0.267115	1.3948	0.100272	0.263822	0	2.39231	2.9562	2.53395	2.73032	2.13723	2.8089	1.46319	1.80808	1.54982	1.66992	1.30718	1.71798
SOGA1	8726	0.267095	6.51846	0.015279	0.0771951	0	77.7501	92.1091	82.7048	116.939	89.1031	91.2117	8.91017	10.5557	9.47798	13.4012	10.2112	10.4529
NQO2	1787	0.267054	4.39965	0.00889162	0.0532548	0	19.2635	24.836	18.2487	21.6489	19.8568	22.5596	10.7798	13.8982	10.2119	12.1147	11.1118	12.6243
STK38L	5096	0.266676	6.65919	0.00869075	0.0524248	0	93.193	100.647	85.8137	105.921	96.1365	124.52	18.2875	19.7502	16.8394	20.7851	18.8651	24.4349
TMEM141	858	0.266554	4.70722	0.0154361	0.0776837	0	22.3163	32.3821	23.9767	25.3668	24.7725	27.713	26.0097	37.7414	27.9449	29.565	28.8723	32.2995
WDR27	3592	0.266304	4.57506	0.00775668	0.0484265	0	22.1557	24.2136	22.2945	27.4	20.3814	26.3638	6.16806	6.74099	6.20672	7.62807	5.67411	7.33959
MSLN	2193	0.266266	-1.86737	0.512092	0.703044	0	0.285649	0.252833	0.17035	0.251732	0.174864	0.265408	0.130255	0.115291	0.0776789	0.114789	0.0797375	0.121025
CCSER2	8100	0.265995	6.83402	0.00809633	0.0499125	0	108.279	110.994	97.2484	124.084	105.152	138.587	13.3678	13.7029	12.006	15.319	12.9817	17.1095
PPP4R3B	5609	0.265777	6.84101	0.0259445	0.109313	0	104.333	100.744	95.8005	140.64	112.088	134.053	18.6011	17.9612	17.0798	25.0741	19.9836	23.8996
TMCC2	4614	0.265647	3.56309	0.0218118	0.0980367	0	9.64066	12.1554	10.9024	13.6129	11.5799	12.828	2.08944	2.63447	2.36289	2.95034	2.50973	2.78024
DNAJC16	6299	0.265339	5.37859	0.00609654	0.0410054	0	38.1163	41.5036	36.6891	48.7004	38.4507	45.9376	6.05117	6.58891	5.82459	7.73145	6.10426	7.29285
ELOF1	1019	0.265284	5.16646	0.0181383	0.0866143	0	29.3326	41.2507	35.1133	42.4458	33.3602	33.751	28.7857	40.4816	34.4586	41.6544	32.7382	33.1217
ARMC2	3736	0.265246	2.6785	0.0522083	0.171503	0	5.46304	6.0291	5.74931	7.74559	6.13968	7.07754	1.46227	1.61379	1.53889	2.07323	1.64338	1.89442
C2orf76	950	0.265153	2.64075	0.0429868	0.151628	0	5.58801	6.04855	5.53637	7.33894	5.77052	6.92272	5.88212	6.3669	5.82776	7.7252	6.07424	7.28707
GALT	1405	0.264934	5.04086	0.00576798	0.0393548	0	30.6894	37.0304	29.1724	37.4305	29.7464	33.1981	21.843	26.3561	20.7633	26.641	21.1718	23.6285
LOC100507283	2908	0.264914	-0.0432047	0.266571	0.482811	0	0.981919	1.08913	0.809161	1.02629	0.738316	0.928927	0.337661	0.374528	0.278254	0.35292	0.253891	0.319438
INTS5	3285	0.264826	5.53064	0.0138954	0.0722533	0	40.1873	57.4515	40.3942	48.2744	45.3093	45.4953	12.2336	17.489	12.2966	14.6954	13.7928	13.8494
IL6ST	9101	0.26479	5.65989	0.0172122	0.0836424	0	48.7389	48.1161	42.3745	54.0642	46.5528	63.3218	5.35533	5.2869	4.65603	5.94047	5.11513	6.95768
HMGXB3	5406	0.264722	6.17995	0.0160516	0.0797159	0	65.4851	75.6749	65.0523	92.7147	66.9731	68.8512	12.1134	13.9983	12.0334	17.1503	12.3887	12.7361
PTP4A2	3929	0.264594	9.46225	0.00217506	0.0201011	0	637.658	772.834	652.972	746.984	631.902	789.72	162.295	196.7	166.193	190.121	160.83	200.998
SLC35A3	6081	0.264581	5.4299	0.0142988	0.0737933	0	42.9723	41.3091	36.3697	48.7391	38.0233	51.0246	7.06666	6.79314	5.98087	8.01498	6.2528	8.39083
SLC2A11	7830	0.264526	4.10407	0.00957595	0.0560676	0	15.8535	19.2153	16.1406	19.1122	14.7858	17.8487	2.02472	2.45407	2.06138	2.4409	1.88835	2.27952
EFHD2	2419	0.264279	6.80869	0.00671032	0.0438486	0	94.0321	127.175	104.765	129.506	106.726	110.188	38.8723	52.5734	43.3093	53.5371	44.1197	45.5512
NPR2	3430	0.264257	2.93691	0.0626315	0.193253	0	6.30213	7.19602	7.28245	9.91435	7.2083	7.82952	1.83736	2.09797	2.12316	2.89048	2.10154	2.28266
MYBL1	5192	0.264149	5.2661	0.0326641	0.126895	0	34.2779	33.0628	34.4107	45.2149	36.1192	47.6407	6.60206	6.36803	6.62763	8.70856	6.9567	9.17578
USP5	3190	0.264123	6.31256	0.00892739	0.0533846	0	71.2516	98.6633	74.017	80.4379	71.3252	80.9714	22.3359	30.9289	23.2028	25.2156	22.359	25.3829
SESN2	3528	0.264024	4.2779	0.0210642	0.0957848	0	16.764	22.5022	16.8859	22.5977	19.1379	18.2468	4.75171	6.37816	4.78626	6.40526	5.42458	5.17199
TTC25	2287	0.263753	1.61059	0.105089	0.272053	0	2.49943	3.32573	3.0663	2.94332	2.68125	3.62724	1.09289	1.45419	1.34075	1.28698	1.17239	1.58602
ADCY6	6102	0.263716	-1.68694	0.483804	0.682135	0	0.249943	0.291731	0.298112	0.329187	0.194294	0.265408	0.0409608	0.047809	0.0488548	0.0539475	0.031841	0.0434952
FAM219A	3645	0.263386	5.76521	0.00665031	0.0435693	0	48.8103	64.6475	49.806	59.5829	49.6032	53.6345	13.391	17.7359	13.6642	16.3465	13.6086	14.7145
RPS6KA3	7710	0.263351	6.82852	0.00954893	0.0559743	0	107.743	107.435	103.36	128.402	98.7207	136.088	13.9745	13.9345	13.4059	16.654	12.8042	17.6508
RPL34-AS1	3773	0.263232	2.01614	0.0736517	0.214948	0	3.98123	4.39541	3.25794	4.06643	3.67215	4.66675	1.05519	1.16496	0.863488	1.07777	0.973271	1.23688
MIR3176	90	0.262858	-0.349889	0.361834	0.578927	0	0.767682	0.991884	0.489756	0.832651	0.757746	0.597167	8.5298	11.0209	5.44173	9.25167	8.4194	6.63519
BTBD6	1987	0.262817	5.36165	0.00531631	0.0374217	0	36.9023	45.2961	38.4352	47.403	36.7215	41.7132	18.5719	22.7962	19.3433	23.8566	18.4809	20.9931
SNORD63	68	0.262638	-1.01449	0.452169	0.656223	0	0.499886	0.427872	0.425874	0.697103	0.31087	0.353877	7.35126	6.29223	6.26286	10.2515	4.57162	5.20407
CORO7	7674	0.262363	3.86193	0.0493463	0.165506	0	13.5505	17.6789	13.4789	17.3501	12.5319	12.3636	1.76576	2.30374	1.75644	2.2609	1.63304	1.6111
[truncated: 13,148 more rows]

## Sheet: A_vs_D
Geneid	gene_length	logFC	logCPM	PValue	FDR	is.sig	CPM.TMMnormalized.10	CPM.TMMnormalized.13	CPM.TMMnormalized.16	CPM.TMMnormalized.1	CPM.TMMnormalized.4	CPM.TMMnormalized.7	FPKM.TMMnormalized.10	FPKM.TMMnormalized.13	FPKM.TMMnormalized.16	FPKM.TMMnormalized.1	FPKM.TMMnormalized.4	FPKM.TMMnormalized.7
SNORD3D	217	4.49352	7.32761	0.113429	0.459879	0	1.30329	21.5166	18.4578	7.01906	863.028	53.4313	6.00596	99.1546	85.0588	32.3459	3977.09	246.227
OR2L1P	925	4.1404	-2.48244	4.98904e-05	0.00710678	1	0.0178533	0	0.0193884	0.371482	0.231691	0.20295	0.0193009	0	0.0209604	0.401603	0.250477	0.219406
TRIM55	2851	3.97875	-1.39216	2.89128e-07	0.000146911	1	0.0178533	0.0637843	0.0387768	0.723413	0.674011	0.553501	0.00626213	0.0223726	0.0136011	0.25374	0.236412	0.194143
GZMK	1045	3.33443	-0.686109	4.35574e-08	5.13039e-05	1	0.10712	0.0850457	0.11633	0.879827	1.09527	1.2177	0.102507	0.0813834	0.111321	0.84194	1.0481	1.16526
MN989412	634	3.07496	7.10369	5.49557e-18	8.41482e-14	1	28.3154	30.255	28.9663	251.826	261.221	224.537	44.6615	47.7208	45.6881	397.202	412.021	354.159
CRH	1434	3.01182	-1.82123	4.11033e-05	0.0064013	1	0.0178533	0.106307	0.0387768	0.430138	0.315942	0.553501	0.01245	0.0741333	0.027041	0.299956	0.220323	0.385984
FLG	12747	2.89287	-2.0749	0.000333067	0.0235256	1	0.0714134	0.0637843	0	0.215069	0.315942	0.516601	0.00560237	0.00500386	0	0.0168721	0.0247856	0.0405272
KRT72	2015	2.82589	-0.679535	6.05681e-07	0.000231855	1	0.0892667	0.191353	0.155107	0.977585	0.800388	1.2915	0.0443011	0.0949642	0.0769763	0.485154	0.397215	0.640944
DHRS2	1687	2.76267	-0.671068	1.43398e-06	0.000467171	1	0.0892667	0.255137	0.11633	0.840723	0.947827	1.2915	0.0529145	0.151237	0.068957	0.498354	0.561842	0.765561
LINC00967	1503	2.61404	-1.4435	1.90877e-05	0.00360829	1	0.0892667	0.14883	0.0387768	0.664758	0.463382	0.571951	0.0593924	0.0990219	0.0257996	0.442287	0.308305	0.380539
ZCCHC12	2197	2.40282	-1.69438	0.000197053	0.0172416	1	0.0892667	0.14883	0.0193884	0.527896	0.315942	0.516601	0.0406312	0.0677424	0.00882494	0.24028	0.143806	0.235139
IL1R2	1699	2.3021	-1.50919	0.000529991	0.0309741	1	0.0178533	0.0850457	0.213272	0.332379	0.505508	0.719551	0.0105081	0.0500563	0.125528	0.195632	0.297533	0.423514
LOC101928823	1309	2.15322	-1.97742	0.00062673	0.0341933	1	0.0714134	0.127569	0.0387768	0.449689	0.379131	0.23985	0.0545557	0.0974549	0.0296232	0.343536	0.289634	0.183232
GPR101	1527	2.12429	-2.21929	0.00145494	0.054739	0	0.10712	0.0212614	0.0581652	0.312827	0.358068	0.20295	0.0701507	0.0139237	0.0380912	0.204864	0.234491	0.132908
NGFR	3420	2.09825	0.808259	9.1106e-09	1.74377e-05	1	0.571307	0.74415	0.639817	2.50262	3.05411	2.8044	0.167049	0.217588	0.187081	0.73176	0.893015	0.820001
SLAMF7	2933	1.95543	-1.85386	0.00142908	0.0543456	0	0.124973	0.0212614	0.135719	0.351931	0.526571	0.27675	0.0426094	0.00724904	0.046273	0.11999	0.179533	0.0943574
MIR663B	115	1.92869	0.270318	0.156796	0.52713	0	1.01764	0.212614	0.193884	2.46352	2.92773	0.27675	8.84905	1.84882	1.68595	21.4219	25.4586	2.40652
RNVU1-19	167	1.92077	-1.02571	7.88765e-05	0.00894503	1	0.124973	0.14883	0.290826	0.606103	0.674011	0.867151	0.748344	0.891197	1.74147	3.62936	4.03599	5.19252
CRISPLD2	4589	1.91871	-0.143441	1.32091e-06	0.000459677	1	0.32136	0.318921	0.445933	1.50548	1.39015	1.23615	0.0700284	0.0694969	0.0971744	0.328063	0.30293	0.269373
MIR3654	112	1.90969	1.26392	0.168527	0.542347	0	1.32115	0.829195	0.775536	0.977585	1.17952	8.81911	11.796	7.40353	6.92443	8.72844	10.5314	78.7421
FUT7	2414	1.90959	-0.610045	1.18956e-05	0.00253348	1	0.232093	0.29766	0.252049	0.899378	1.24271	0.811801	0.0961448	0.123306	0.104411	0.372568	0.514792	0.336289
HCG26	7080	1.90528	-1.96063	0.000870755	0.0417962	1	0.10712	0.106307	0.0581652	0.273724	0.315942	0.442801	0.01513	0.0150151	0.00821542	0.0386616	0.0446246	0.0625424
SULT1B1	1309	1.89942	-0.577375	1.02407e-05	0.00230597	1	0.2678	0.340183	0.193884	1.01669	0.863576	1.107	0.204584	0.25988	0.148116	0.776691	0.659722	0.845685
ZNF683	1732	1.88474	-1.59301	0.001721	0.0603731	0	0.142827	0.170091	0.0581652	0.273724	0.337005	0.756451	0.0824635	0.0982052	0.0335827	0.158039	0.194576	0.43675
TARP	1027	1.82619	0.561359	2.9743e-07	0.000146911	1	0.767694	0.531536	0.581652	1.99427	2.12735	2.60145	0.747511	0.517561	0.56636	1.94184	2.07142	2.53306
HLA-DMB	11176	1.81326	-2.11464	0.00375441	0.093324	0	0.142827	0.0850457	0.0193884	0.371482	0.252754	0.27675	0.0127798	0.00760967	0.00173482	0.0332393	0.0226158	0.0247629
ANKRD62	4733	1.79399	-0.0922684	1.6881e-06	0.000516963	1	0.339214	0.467751	0.407156	1.32952	1.45334	1.42065	0.0716699	0.0988276	0.086025	0.280903	0.307064	0.300159
CLIC3	813	1.74559	-1.56288	0.00111623	0.0477236	1	0.0714134	0.212614	0.135719	0.312827	0.484445	0.590401	0.0878393	0.261518	0.166936	0.384781	0.595873	0.7262
PPARGC1A	6318	1.72622	-1.71092	0.00296113	0.0827389	0	0.142827	0.0212614	0.193884	0.410586	0.29488	0.516601	0.0226063	0.00336521	0.0306876	0.0649867	0.0466729	0.0817665
ANKRD30BL	2168	1.68514	0.169025	0.012764	0.1756	0	0.249947	1.12686	0.213272	2.01383	1.09527	1.845	0.115289	0.519767	0.0983729	0.928886	0.505197	0.851016
MIR7641-2	1501	1.68208	-0.0782518	0.331905	0.697711	0	0.64272	0.361444	0.252049	0.136862	0.168503	3.70845	0.428195	0.240802	0.167921	0.0911805	0.11226	2.47066
GLI2	6769	1.67725	-2.11501	0.00355771	0.0907928	0	0.142827	0.0637843	0.0581652	0.254172	0.273817	0.35055	0.0211001	0.009423	0.00859288	0.0375494	0.0404516	0.0517876
LOC101927166	2265	1.63894	-0.61027	8.24397e-05	0.00904057	1	0.21424	0.44649	0.252049	0.938482	1.03208	0.848701	0.0945873	0.197126	0.11128	0.414341	0.455664	0.374702
PI16	2332	1.63099	4.25523	1.78686e-12	1.36802e-08	1	8.62317	10.2693	9.05438	27.7048	28.8561	29.889	3.69776	4.40363	3.88267	11.8803	12.374	12.8169
EPPK1	16007	1.60505	-2.0744	0.00291499	0.0818979	0	0.0892667	0.106307	0.096942	0.254172	0.273817	0.369	0.00557673	0.00664129	0.00605623	0.0158788	0.0171061	0.0230524
KRT2	2414	1.60313	0.166469	5.07602e-05	0.00710678	1	0.303507	0.722888	0.60104	1.6619	1.17952	2.0295	0.125728	0.299457	0.248981	0.68844	0.488616	0.840722
GNG3	951	1.59814	-1.60515	0.00140357	0.0541347	0	0.0714134	0.191353	0.174496	0.391034	0.421257	0.498151	0.0750929	0.201212	0.183486	0.411182	0.442962	0.523818
HKDC1	3689	1.57211	1.04444	1.38318e-07	0.000109957	1	0.946227	1.12686	0.988808	3.10872	2.61179	3.3579	0.2565	0.305464	0.268042	0.8427	0.707994	0.910248
CCR4	1657	1.52229	1.34861	2.56795e-07	0.000145632	1	0.928374	1.53082	1.45413	3.69527	3.62281	3.85605	0.560274	0.923852	0.877568	2.2301	2.18637	2.32713
LOC101928336	2909	1.51539	-1.02614	0.00107717	0.047532	1	0.21424	0.255137	0.232661	0.371482	0.674011	0.959401	0.0736473	0.0877061	0.0799796	0.127701	0.231698	0.329804
TSPAN32	1376	1.50125	-0.308271	5.10544e-05	0.00710678	1	0.446334	0.489013	0.271438	1.0949	1.24271	1.08855	0.32437	0.355387	0.197266	0.795709	0.90313	0.791098
KRT73	2284	1.49929	-0.326888	5.18082e-05	0.00714673	1	0.303507	0.403967	0.48471	1.27086	0.947827	1.1439	0.132884	0.176868	0.21222	0.556419	0.414986	0.500832
CXCL3	1157	1.48403	-1.80504	0.00495025	0.108129	0	0.142827	0.106307	0.135719	0.547448	0.231691	0.31365	0.123446	0.0918817	0.117302	0.473161	0.200252	0.271089
PRG4	5050	1.47818	-1.288	0.00167064	0.0596006	0	0.196387	0.233876	0.155107	0.586551	0.315942	0.719551	0.0388885	0.046312	0.0307143	0.116149	0.0625629	0.142485
LOC101928370	1213	1.47621	-1.9421	0.0144466	0.18542	0	0.178533	0.127569	0.0387768	0.527896	0.252754	0.20295	0.147183	0.105168	0.0319677	0.435199	0.208371	0.167313
CRIP2	3047	1.4751	0.423733	1.71034e-05	0.00335753	1	0.624867	0.89298	0.562264	1.44683	1.97991	2.3247	0.205076	0.293068	0.18453	0.474836	0.649789	0.762948
SIX2	2154	1.47485	-1.13448	0.000323016	0.0234408	1	0.21424	0.191353	0.252049	0.625655	0.610822	0.608851	0.0994615	0.088836	0.117014	0.290462	0.283576	0.28266
TNS4	4072	1.41915	1.76109	5.25647e-07	0.000211808	1	1.57109	2.36002	1.57046	5.41582	3.95981	5.23981	0.385829	0.579572	0.385673	1.33002	0.972449	1.28679
P2RY1	3108	1.41857	-0.996461	0.000452464	0.0274926	1	0.285654	0.191353	0.271438	0.645206	0.800388	0.590401	0.0919091	0.0615678	0.0873351	0.207595	0.257525	0.189962
KRT1	2451	1.39688	1.79688	2.53341e-08	3.5265e-05	1	1.82104	1.97731	1.88067	5.00524	4.48638	5.44276	0.742979	0.806737	0.767309	2.04212	1.83043	2.22063
GAS6-AS2	1942	1.38399	-1.92389	0.00890212	0.146547	0	0.0714134	0.191353	0.11633	0.254172	0.29488	0.42435	0.0367731	0.0985339	0.0599024	0.130882	0.151843	0.218512
HLA-DPA1	14229	1.37701	-1.87207	0.00740719	0.132785	0	0.10712	0.0850457	0.193884	0.254172	0.337005	0.42435	0.00752829	0.00597693	0.013626	0.017863	0.0236844	0.0298229
PTGES	1787	1.35736	-1.2507	0.00167537	0.0596006	0	0.178533	0.276398	0.193884	0.508344	0.716136	0.442801	0.0999068	0.154672	0.108497	0.284468	0.400748	0.24779
NTRK1	2857	1.34764	-0.731957	0.00131593	0.0526095	0	0.357067	0.403967	0.193884	1.134	0.652948	0.645751	0.12498	0.141396	0.0678628	0.396919	0.228543	0.226024
LPAL2	2502	1.34217	-1.18391	0.003887	0.0953493	0	0.16068	0.318921	0.213272	0.449689	0.884639	0.42435	0.0642207	0.127467	0.0852408	0.179732	0.353573	0.169605
RNVU1-7	164	1.34024	-0.239496	0.0246272	0.242415	0	0.339214	0.510274	0.523487	0.449689	0.842513	2.1402	2.06838	3.11143	3.19199	2.74201	5.13728	13.05
CRTAM	2624	1.33903	-2.09424	0.00977855	0.153254	0	0.124973	0.0850457	0.11633	0.215069	0.315942	0.31365	0.0476271	0.0324107	0.0443332	0.0819622	0.120405	0.119531
TSC22D3	2807	1.33901	1.27284	1.20124e-05	0.00253348	1	1.46397	0.89298	1.6674	3.38245	4.17044	2.7306	0.521544	0.318126	0.594016	1.205	1.48573	0.972783
S100A5	710	1.33413	-1.96071	0.00780897	0.136966	0	0.142827	0.127569	0.096942	0.371482	0.231691	0.3321	0.201164	0.179674	0.136538	0.523215	0.326326	0.467747
OVAAL	1491	1.33162	-2.09246	0.0221629	0.228785	0	0.0357067	0.191353	0.11633	0.215069	0.379131	0.2583	0.0239481	0.128339	0.0780217	0.144245	0.25428	0.17324
KIF19	3643	1.33101	0.926061	1.64883e-06	0.000515241	1	1.21403	1.08433	0.872478	2.52217	2.65392	2.82285	0.333249	0.297648	0.239494	0.692333	0.728498	0.774871
ITGB7	2867	1.32566	2.4521	4.77877e-09	1.04532e-05	1	3.19575	2.9766	3.12153	6.99951	8.17238	8.15491	1.11467	1.03823	1.08878	2.44141	2.8505	2.84441
RNVU1-6	164	1.31534	-0.355891	0.000289083	0.0220221	1	0.42848	0.340183	0.504098	0.80162	1.32696	1.0701	2.61268	2.07428	3.07377	4.88793	8.09121	6.52501
SUGCT	1728	1.30915	-1.67864	0.0145001	0.185485	0	0.10712	0.29766	0.0775536	0.293276	0.337005	0.535051	0.0619908	0.172257	0.0448806	0.16972	0.195026	0.309636
TLR6	5887	1.30435	-1.69451	0.00642639	0.122237	0	0.21424	0.14883	0.096942	0.293276	0.421257	0.442801	0.0363921	0.0252811	0.0164671	0.0498175	0.0715571	0.0752167
FIRRE	2928	1.30322	-1.97732	0.0186047	0.210645	0	0.0357067	0.14883	0.193884	0.312827	0.358068	0.2583	0.0121949	0.0508299	0.0662172	0.10684	0.122291	0.0882173
CSGALNACT1	4887	1.29293	-1.75679	0.013229	0.178943	0	0.16068	0.0425228	0.232661	0.293276	0.400194	0.4059	0.0328791	0.00870122	0.0476081	0.0600114	0.0818895	0.0830572
LINC01480	956	1.28721	-1.87184	0.0211539	0.22424	0	0.196387	0.127569	0.0775536	0.547448	0.252754	0.20295	0.205426	0.13344	0.081123	0.572644	0.264387	0.212291
MAFA	2373	1.28414	0.434886	1.23917e-05	0.00256408	1	0.660574	0.786673	0.85309	2.03338	1.83247	1.7343	0.278371	0.33151	0.359498	0.856881	0.772215	0.730848
RNU5A-1	117	1.26621	4.99052	0.117458	0.465672	0	15.3539	24.8971	15.8209	21.8393	29.8882	82.5269	131.23	212.796	135.222	186.66	255.454	705.359
METRNL	3223	1.25525	-0.568427	0.00109648	0.0477236	1	0.2678	0.318921	0.542875	0.997137	1.01102	0.701101	0.0830903	0.0989517	0.168438	0.309382	0.313688	0.217531
SPERT	1749	1.2515	-1.09402	0.00256409	0.0771343	0	0.196387	0.318921	0.252049	0.449689	0.568696	0.793351	0.112285	0.182345	0.14411	0.257112	0.325155	0.453603
RNA5-8S5	1248	1.24795	2.61739	0.273627	0.647971	0	7.2306	0.29766	3.12153	8.52454	13.0168	4.40956	5.79375	0.23851	2.50123	6.83056	10.4302	3.5333
ATP2B2	8962	1.24018	-0.504288	0.00105017	0.0470987	1	0.446334	0.44649	0.290826	0.91893	0.652948	1.2177	0.0498029	0.0498203	0.032451	0.102536	0.0728574	0.135874
DHH	1936	1.23384	-1.33351	0.00579803	0.117162	0	0.232093	0.14883	0.252049	0.723413	0.400194	0.38745	0.119883	0.076875	0.130191	0.373664	0.206712	0.200129
ALS2CL	5612	1.23189	0.0262981	0.000166461	0.0153545	1	0.785547	0.510274	0.445933	1.36862	1.51652	1.2546	0.139976	0.0909255	0.0794607	0.243874	0.270229	0.223557
GPRC5B	3359	1.23183	-0.83633	0.00195447	0.0652	0	0.196387	0.276398	0.465322	0.68431	0.82145	0.701101	0.0584658	0.0822859	0.13853	0.203724	0.244552	0.208723
LINC01143	650	1.22994	-1.7879	0.00901242	0.146651	0	0.142827	0.212614	0.096942	0.351931	0.337005	0.369	0.219733	0.327099	0.149142	0.541432	0.51847	0.567693
RNU5D-1	100	1.22953	1.17091	0.00812314	0.139598	0	1.16047	1.53082	1.27963	2.03338	2.06416	5.12911	11.6047	15.3082	12.7963	20.3338	20.6416	51.2911
TUBB3	2006	1.22641	2.93528	4.21558e-09	1.04532e-05	1	4.44548	4.08219	5.13793	10.7925	10.7631	10.4612	2.21609	2.03499	2.56128	5.38013	5.36546	5.21494
CEACAM1	3612	1.22474	-0.141504	0.00044238	0.0271904	1	0.5356	0.616581	0.407156	1.21221	0.863576	1.5498	0.148284	0.170704	0.112723	0.335605	0.239085	0.42907
KIF5C	11268	1.22264	-0.248302	0.000815726	0.0402916	1	0.42848	0.574058	0.445933	0.821172	0.947827	1.5867	0.0380263	0.0509459	0.0395752	0.0728764	0.0841167	0.140815
LOC100506274	923	1.21745	-2.09379	0.0188781	0.211926	0	0.10712	0.170091	0.0775536	0.332379	0.231691	0.2583	0.116056	0.184281	0.0840234	0.360107	0.25102	0.279849
C18orf61	2713	1.21409	-2.24241	0.0288566	0.259303	0	0.16068	0.0425228	0.096942	0.254172	0.231691	0.23985	0.059226	0.0156737	0.0357324	0.0936868	0.0854003	0.0884078
GALNT3	3267	1.21383	-1.38134	0.00680687	0.126489	0	0.249947	0.276398	0.096942	0.410586	0.484445	0.553501	0.0765065	0.0846031	0.0296731	0.125677	0.148284	0.169422
GRM4	8394	1.20291	-0.41817	0.000765109	0.0389214	1	0.37492	0.574058	0.348991	0.840723	0.905702	1.2177	0.0446653	0.0683891	0.0415763	0.100158	0.107899	0.145068
CYP4B1	2158	1.20228	-1.27537	0.00455574	0.10396	0	0.232093	0.191353	0.252049	0.723413	0.421257	0.42435	0.10755	0.0886714	0.116798	0.335224	0.195207	0.196641
GGN	2154	1.19562	-0.888971	0.00111486	0.0477236	1	0.32136	0.318921	0.271438	0.80162	0.610822	0.682651	0.149192	0.14806	0.126016	0.372154	0.283576	0.316922
ACTN2	5110	1.18775	-1.7559	0.0141919	0.184516	0	0.0892667	0.233876	0.155107	0.371482	0.273817	0.42435	0.017469	0.0457682	0.0303537	0.0726971	0.0535845	0.0830431
HS3ST3B1	5400	1.18249	2.05496	1.80319e-07	0.000110442	1	2.46376	2.59389	2.5011	6.51072	4.9287	5.70106	0.456252	0.480351	0.463167	1.20569	0.912723	1.05575
CD27	1320	1.18137	1.51322	1.39764e-06	0.00046523	1	1.62465	1.4883	2.05517	4.06675	4.10725	3.5793	1.2308	1.1275	1.55695	3.08087	3.11155	2.71159
LOC101928979	1039	1.17889	-1.32184	0.00433471	0.101759	0	0.178533	0.233876	0.252049	0.449689	0.421257	0.627301	0.171832	0.225097	0.242588	0.43281	0.405444	0.603754
MAFB	3393	1.1776	0.385768	8.55064e-05	0.00922085	1	0.856961	0.850457	0.620429	1.89652	1.39015	1.97415	0.252567	0.25065	0.182856	0.558949	0.40971	0.581831
LOC101928794	743	1.17375	-2.00037	0.108884	0.453397	0	0.249947	0	0.11633	0.254172	0.126377	0.479701	0.336402	0	0.156569	0.342089	0.17009	0.645627
KCNH3	3853	1.16931	-0.537315	0.00168088	0.0596006	0	0.410627	0.233876	0.542875	0.782068	0.863576	1.05165	0.106573	0.0606996	0.140897	0.202976	0.224131	0.272943
MEGF11	8767	1.16878	-1.94145	0.0176195	0.205812	0	0.10712	0.106307	0.193884	0.332379	0.358068	0.23985	0.0122186	0.0121258	0.0221152	0.0379125	0.0408427	0.0273583
RNVU1-14	164	1.16733	1.61184	5.05716e-07	0.000209284	1	1.82104	2.08362	1.68679	3.969	4.27575	4.29885	11.1039	12.705	10.2853	24.2012	26.0717	26.2125
COX6B2	1663	1.16446	-0.0325194	0.00125946	0.0516863	0	0.553454	0.680365	0.504098	1.54458	0.716136	1.60515	0.332804	0.409119	0.303126	0.928794	0.430629	0.965215
BIN1	2714	1.16443	3.58679	2.29581e-09	7.03069e-06	1	6.62359	8.39826	7.1931	16.9318	16.766	16.0146	2.44053	3.09442	2.65037	6.23868	6.1776	5.90074
RUVBL1-AS1	588	1.16411	-1.37012	0.00622892	0.120868	0	0.21424	0.233876	0.193884	0.527896	0.315942	0.590401	0.364354	0.397748	0.329735	0.897782	0.537317	1.00408
GPR132	3870	1.16306	-0.161659	0.000341084	0.0235256	1	0.624867	0.361444	0.581652	1.23176	1.13739	1.1808	0.161464	0.0933964	0.150298	0.318284	0.2939	0.305117
S1PR1	3050	1.16189	4.35652	5.62689e-11	2.87196e-07	1	12.8544	12.9482	12.0984	28.6628	27.4449	28.6898	4.21456	4.24531	3.96668	9.39764	8.99832	9.40649
KLF4	2933	1.15944	0.0311324	8.26594e-05	0.00904057	1	0.607014	0.59532	0.620429	1.30996	1.36908	1.4022	0.20696	0.202973	0.211534	0.44663	0.466786	0.478078
GRAPL	967	1.1585	-1.88965	0.0140935	0.183973	0	0.16068	0.106307	0.155107	0.273724	0.29488	0.38745	0.166163	0.109935	0.1604	0.283065	0.304943	0.400673
BEST1	3380	1.14976	-1.78805	0.0256112	0.246848	0	0.142827	0.127569	0.193884	0.156414	0.463382	0.42435	0.0422564	0.0377422	0.0573621	0.0462762	0.137095	0.125547
SNORD18B	70	1.13959	-1.35889	0.0136341	0.181919	0	0.37492	0.127569	0.135719	0.547448	0.400194	0.498151	5.356	1.82241	1.93884	7.82068	5.71705	7.11644
STAC	3083	1.1198	-1.85427	0.0153957	0.191813	0	0.124973	0.191353	0.135719	0.273724	0.337005	0.369	0.0405363	0.0620671	0.0440217	0.0887849	0.109311	0.119689
ARHGEF28	6508	1.11914	-2.28536	0.0630047	0.361051	0	0.0357067	0.212614	0.0775536	0.195517	0.273817	0.2214	0.00548658	0.0326697	0.0119167	0.0300426	0.0420739	0.0340197
GPR18	1661	1.11502	-1.05286	0.00484877	0.107135	0	0.178533	0.382706	0.290826	0.703861	0.589759	0.535051	0.107486	0.230407	0.175091	0.423758	0.355063	0.322126
TMEM191B	1334	1.11141	-0.507761	0.00278331	0.0812929	0	0.392774	0.425228	0.445933	0.547448	1.17952	1.01475	0.294433	0.318762	0.334283	0.410381	0.884197	0.760683
HEPACAM	3545	1.10893	0.610413	6.09566e-05	0.00776734	1	0.8034	1.12686	0.911255	2.22889	1.72715	2.1402	0.226629	0.317872	0.257054	0.628743	0.487208	0.603724
YAP1	5704	1.10592	-1.18813	0.00742211	0.132785	0	0.196387	0.233876	0.329603	0.547448	0.379131	0.701101	0.0344297	0.041002	0.0577845	0.0959761	0.0664676	0.122914
SERPINE1	3190	1.09408	-0.819388	0.00366155	0.0921554	0	0.2678	0.340183	0.407156	0.527896	0.926765	0.719551	0.0839499	0.10664	0.127635	0.165485	0.290522	0.225565
GTSCR1	598	1.09126	-1.92423	0.0216568	0.226354	0	0.124973	0.191353	0.11633	0.293276	0.252754	0.369	0.208986	0.319988	0.194532	0.490427	0.422666	0.617058
PP14571	2017	1.09105	-2.243	0.113093	0.459879	0	0.232093	0.0637843	0.0193884	0.0977585	0.273817	0.3321	0.115069	0.0316233	0.00961249	0.0484673	0.135754	0.164651
AHNAK	19265	1.09058	4.73557	1.05073e-10	4.02221e-07	1	17.2999	17.0091	16.6934	37.3633	33.6795	37.5642	0.897996	0.882904	0.866515	1.93944	1.74822	1.94987
LRRK1	7671	1.088	-0.153683	0.000358	0.0241485	1	0.48204	0.574058	0.60104	1.23176	1.24271	1.05165	0.0628393	0.0748349	0.0783523	0.160573	0.162001	0.137094
SNORD42B	67	1.08673	-0.554827	0.00812099	0.139598	0	0.285654	0.616581	0.348991	0.488793	1.01102	1.12545	4.26349	9.2027	5.20882	7.29541	15.0898	16.7978
IQSEC2	6967	1.08344	-1.14579	0.0045132	0.103281	0	0.32136	0.191353	0.271438	0.547448	0.547634	0.590401	0.0461261	0.0274656	0.0389605	0.0785773	0.0786039	0.0847425
TENM1	12893	1.08294	-0.113044	0.000768153	0.0389469	1	0.678427	0.637843	0.387768	1.07534	1.39015	1.16235	0.0526198	0.049472	0.0300759	0.0834052	0.107822	0.0901537
ANXA1	1536	1.08225	2.50411	4.48306e-07	0.000196708	1	4.05271	3.44435	3.3348	6.37386	8.59364	8.02576	2.63848	2.24242	2.1711	4.14965	5.59481	5.2251
CEP170P1	1070	1.08089	-1.08063	0.0522435	0.334239	0	0.303507	0.489013	0.0581652	0.625655	0.842513	0.3321	0.283651	0.457021	0.05436	0.584724	0.787396	0.310374
ULK2	9139	1.08039	-1.67909	0.0129063	0.176922	0	0.142827	0.170091	0.213272	0.410586	0.315942	0.38745	0.0156283	0.0186116	0.0233365	0.0449268	0.0345708	0.0423953
BTN1A1	2851	1.07939	-1.94206	0.0312349	0.269599	0	0.21424	0.106307	0.096942	0.254172	0.400194	0.2583	0.0751456	0.0372877	0.0340028	0.0891519	0.14037	0.0905999
C15orf54	3090	1.07695	-2.11567	0.0697285	0.375257	0	0.21424	0.106307	0.0387768	0.156414	0.231691	0.38745	0.0693334	0.0344036	0.0125491	0.0506193	0.074981	0.125388
IGFBP4	2236	1.07528	-1.35708	0.00897084	0.146548	0	0.232093	0.14883	0.290826	0.547448	0.484445	0.4059	0.103799	0.0665608	0.130065	0.244834	0.216657	0.18153
LRRN4CL	2585	1.07045	-0.812717	0.00352863	0.0903518	0	0.392774	0.29766	0.329603	0.938482	0.652948	0.571951	0.151943	0.115149	0.127506	0.363049	0.252591	0.221258
SNORD68	72	1.0632	0.11289	0.000269432	0.0210487	1	0.571307	0.786673	0.678594	1.23176	1.51652	1.49445	7.93482	10.926	9.42492	17.1077	21.0628	20.7563
ANAPC1P1	1771	1.05841	-1.83885	0.0293667	0.261432	0	0.196387	0.170091	0.096942	0.332379	0.210628	0.42435	0.11089	0.0960426	0.0547386	0.187679	0.118932	0.239611
MYO5B	9520	1.05652	0.392313	0.000716624	0.0374786	1	1.0712	0.489013	0.891866	1.42727	1.87459	1.86345	0.112521	0.0513669	0.0936834	0.149924	0.196911	0.195741
HLA-DRB1	6373	1.05172	0.920366	2.70447e-05	0.00461152	1	1.35685	1.25442	1.0082	2.50262	2.73817	2.2878	0.212907	0.196834	0.158198	0.392691	0.429651	0.358984
MYO1F	4173	1.04985	2.379	1.68189e-07	0.000109957	1	3.32072	3.33804	3.43175	7.60561	6.19247	7.08481	0.795764	0.799914	0.822369	1.82258	1.48394	1.69777
GRIP1	5060	1.04409	-1.85376	0.0441336	0.311273	0	0.196387	0.170091	0.096942	0.175965	0.505508	0.2952	0.0388116	0.0336149	0.0191585	0.0347758	0.0999028	0.05834
RAB27B	7003	1.04285	-0.39888	0.00332233	0.0880131	0	0.58916	0.467751	0.348991	0.68431	1.26377	0.977851	0.0841297	0.066793	0.0498345	0.0977167	0.180461	0.139633
VASN	5612	1.04036	-0.283151	0.00310823	0.0846853	0	0.58916	0.552797	0.387768	0.80162	0.863576	1.476	0.104982	0.0985027	0.0690962	0.14284	0.15388	0.263008
KRT73-AS1	3808	1.03919	-1.07315	0.00499201	0.108742	0	0.21424	0.318921	0.329603	0.586551	0.610822	0.571951	0.0562605	0.0837503	0.0865554	0.154031	0.160405	0.150197
PRDM16	8723	1.03875	0.0910517	0.000623407	0.0341933	1	0.8034	0.616581	0.581652	1.30996	1.11633	1.6974	0.0921014	0.0706845	0.0666803	0.150174	0.127975	0.194589
COLEC12	3134	1.03784	-1.16491	0.0143813	0.184892	0	0.249947	0.403967	0.155107	0.723413	0.463382	0.461251	0.0797533	0.128898	0.0494918	0.230827	0.147857	0.147176
ABCA17P	4188	1.03324	-1.66321	0.0256071	0.246848	0	0.16068	0.212614	0.174496	0.215069	0.505508	0.4059	0.0383668	0.0507675	0.0416656	0.0513536	0.120704	0.0969199
EOMES	3660	1.03004	2.51544	9.31109e-08	7.92063e-05	1	3.82062	3.97589	3.41236	7.74248	7.35093	7.78591	1.04388	1.08631	0.932338	2.11543	2.00845	2.1273
LOC100287944	569	1.02609	-1.17628	0.0105858	0.159757	0	0.196387	0.212614	0.387768	0.645206	0.484445	0.498151	0.345144	0.373663	0.68149	1.13393	0.851397	0.875484
FAM153A	1794	1.02515	-1.90557	0.0627096	0.360079	0	0.124973	0.29766	0.0387768	0.332379	0.273817	0.31365	0.0696619	0.16592	0.0216147	0.185273	0.152629	0.174833
GZMM	941	1.02386	2.89257	6.63039e-08	5.97203e-05	1	5.01679	5.18779	4.42056	9.32616	10.8684	9.55711	5.33134	5.51306	4.69772	9.91091	11.5499	10.1563
SULF2	4451	1.02333	-0.82038	0.00484749	0.107135	0	0.446334	0.318921	0.271438	0.723413	0.842513	0.571951	0.100277	0.0716516	0.0609835	0.162528	0.189286	0.128499
CASS4	3258	1.02044	-0.763306	0.00282576	0.0812929	0	0.303507	0.403967	0.387768	0.821172	0.695073	0.701101	0.0931574	0.123992	0.11902	0.252048	0.213344	0.215194
CGNL1	7339	1.02036	-1.27562	0.00944304	0.15046	0	0.196387	0.255137	0.290826	0.508344	0.400194	0.590401	0.0267593	0.0347646	0.0396275	0.0692662	0.0545297	0.080447
SNAI1	1706	1.01475	0.510829	0.000356199	0.0241333	1	1.12476	0.659104	0.950032	1.64234	2.16947	1.7712	0.659297	0.386345	0.556877	0.962687	1.27167	1.03822
ID2	1364	1.0139	1.49784	8.02097e-06	0.00188949	1	1.82104	2.06236	1.6674	3.28469	4.23363	3.69	1.33507	1.51199	1.22244	2.40813	3.10383	2.70528
LINC00479	2033	1.01103	-0.455491	0.00856115	0.144586	0	0.48204	0.403967	0.48471	1.40772	0.842513	0.535051	0.237108	0.198705	0.238421	0.692436	0.414419	0.263183
C4orf26	2062	1.00952	-2.22051	0.0773164	0.389175	0	0.21424	0.0850457	0.0387768	0.23462	0.231691	0.23985	0.103899	0.0412443	0.0188054	0.113783	0.112362	0.116319
EXOC3L4	2579	1.00878	-2.03398	0.0503401	0.328003	0	0.0892667	0.127569	0.193884	0.23462	0.400194	0.20295	0.0346129	0.0494643	0.075178	0.0909734	0.155174	0.0786934
CDS1	4538	1.00658	0.494509	0.000445797	0.0271954	1	1.17832	0.680365	0.85309	1.87696	2.08522	1.5498	0.259656	0.149926	0.187988	0.41361	0.459502	0.341516
ST8SIA1	9714	1.0034	-1.87154	0.0346362	0.282251	0	0.178533	0.212614	0.0775536	0.293276	0.315942	0.3321	0.018379	0.0218874	0.00798369	0.030191	0.0325244	0.0341878
LOC100506457	2777	1.00222	-1.87172	0.0411157	0.30253	0	0.124973	0.14883	0.193884	0.469241	0.210628	0.2583	0.045003	0.0535938	0.0698178	0.168974	0.0758474	0.0930142
SIRPD	812	1.00041	-2.35712	0.0572151	0.346218	0	0.0892667	0.0850457	0.135719	0.215069	0.210628	0.20295	0.109934	0.104736	0.167141	0.264863	0.259394	0.249939
OTOF	7449	0.987974	2.7538	1.59573e-07	0.000109957	0	4.30266	5.03896	4.16851	9.1893	8.25663	9.29881	0.577615	0.676461	0.559606	1.23363	1.10842	1.24833
SNORA31	130	0.987146	-1.74031	0.0539711	0.339386	0	0.21424	0.14883	0.155107	0.136862	0.505508	0.4059	1.648	1.14485	1.19313	1.05278	3.88852	3.12231
NPPC	701	0.986767	-0.0899174	0.00547844	0.11413	0	0.624867	0.531536	0.659206	1.21221	1.74821	0.682651	0.891394	0.758253	0.940379	1.72925	2.49389	0.973824
ATP1B2	3453	0.985493	0.833499	4.8315e-05	0.00697924	0	1.19617	1.23316	1.08575	2.50262	2.40116	2.0664	0.346416	0.357128	0.314437	0.724766	0.695385	0.598437
TNNT3	1535	0.985016	1.44667	5.44479e-05	0.00731321	0	1.80319	1.95605	1.6674	4.22317	3.89662	2.63835	1.17472	1.2743	1.08626	2.75125	2.53852	1.7188
SNORA65	136	0.983826	-0.216134	0.00399502	0.0967907	0	0.58916	0.637843	0.426545	0.879827	0.842513	1.53135	4.33206	4.69002	3.13636	6.46931	6.19495	11.2599
KLF2	1649	0.981089	4.52876	5.2345e-08	5.72504e-05	0	13.8006	16.5626	16.1699	30.0705	26.5181	35.1288	8.36909	10.0441	9.8059	18.2356	16.0813	21.3031
CRLF2	3902	0.980428	-1.7386	0.0459618	0.315874	0	0.10712	0.233876	0.193884	0.215069	0.526571	0.31365	0.0274526	0.0599374	0.0496884	0.0551176	0.134949	0.0803819
MIR616	95	0.975606	-1.83725	0.0326117	0.275269	0	0.124973	0.170091	0.193884	0.410586	0.29488	0.2583	1.31551	1.79044	2.04088	4.32196	3.104	2.71895
POU3F1	2928	0.973853	-0.897925	0.00546097	0.113922	0	0.410627	0.318921	0.271438	0.606103	0.695073	0.682651	0.140241	0.108921	0.0927041	0.207002	0.237388	0.233146
AVPR2	2194	0.970926	-1.8368	0.0366547	0.290434	0	0.124973	0.255137	0.11633	0.312827	0.337005	0.31365	0.0569614	0.116289	0.0530221	0.142583	0.153603	0.142958
BBC3	2095	0.968752	2.54546	6.29291e-07	0.000235017	0	3.67779	3.61444	4.47872	7.33189	8.46726	7.26931	1.75551	1.72527	2.13781	3.49971	4.04165	3.46984
GBGT1	2059	0.968312	0.997263	8.00332e-05	0.00894503	0	1.24973	1.4883	1.24086	2.50262	2.16947	3.08115	0.606962	0.722826	0.602651	1.21545	1.05365	1.49643
ITGB5	4379	0.964353	0.896263	6.47659e-05	0.00776734	0	1.12476	1.10559	1.47352	2.44396	2.31691	2.4723	0.256853	0.252476	0.336497	0.55811	0.529096	0.564582
RNU11	135	0.962682	3.62973	0.165917	0.538359	0	5.74878	11.4174	8.04619	8.97423	12.0269	27.7488	42.5835	84.5732	59.6014	66.4758	89.088	205.547
CACNA1I	10003	0.962138	3.03143	3.48289e-07	0.000161606	0	5.90946	6.16581	4.49811	11.1445	10.4472	10.6826	0.590768	0.616396	0.449676	1.11411	1.0444	1.06794
SNORA15	133	0.960563	-1.8532	0.0739265	0.381485	0	0.21424	0.191353	0.0775536	0.332379	0.484445	0.1476	1.61083	1.43874	0.58311	2.49909	3.64244	1.10978
AGAP2-AS1	1531	0.958653	-1.57622	0.0230816	0.234552	0	0.16068	0.276398	0.174496	0.410586	0.442319	0.3321	0.104951	0.180535	0.113975	0.268181	0.288909	0.216917
HLA-DQB1	4940	0.953856	1.62234	1.85729e-05	0.00355486	0	1.92816	2.50885	1.80312	4.10586	4.38107	3.5793	0.390316	0.507864	0.365004	0.831145	0.886856	0.724555
GBP1P1	1234	0.950898	0.152607	0.00381961	0.0946373	0	0.821254	0.999287	0.387768	1.36862	1.66396	1.23615	0.665522	0.809795	0.314237	1.10909	1.34843	1.00174
LAMC3	6098	0.949587	-0.288854	0.00541042	0.113064	0	0.607014	0.59532	0.387768	0.879827	0.779325	1.4022	0.0995431	0.0976254	0.0635894	0.144281	0.1278	0.229945
MIR6764	61	0.949045	-1.63539	0.0510795	0.330431	0	0.339214	0.127569	0.096942	0.312827	0.463382	0.35055	5.56088	2.09129	1.58921	5.12832	7.59643	5.74673
CNTFR	2111	0.948851	-0.502423	0.00629963	0.121516	0	0.42848	0.59532	0.348991	0.68431	0.82145	1.12545	0.202975	0.282008	0.16532	0.324164	0.389129	0.533137
C10orf10	2060	0.943597	2.53589	2.77119e-07	0.000146911	0	4.30266	3.82706	3.6838	7.74248	7.54049	7.47226	2.08867	1.85779	1.78825	3.75848	3.66043	3.62731
NUDT13	2296	0.942855	-2.30902	0.128135	0.483253	0	0.0178533	0.212614	0.11633	0.215069	0.168503	0.2583	0.00777585	0.092602	0.0506665	0.0936711	0.0733897	0.1125
CRHBP	1838	0.941058	-1.59224	0.0420538	0.305179	0	0.2678	0.170091	0.155107	0.586551	0.273817	0.2952	0.145702	0.0925415	0.0843891	0.319125	0.148975	0.16061
PYGO1	8396	0.93807	-0.170593	0.00307271	0.0844028	0	0.660574	0.722888	0.36838	1.01669	1.15846	1.1808	0.0786772	0.0860991	0.0438756	0.121092	0.137977	0.140639
FA2H	2427	0.937952	0.698322	0.000576563	0.0333145	0	1.14261	0.956764	1.14392	2.268	1.45334	2.49075	0.470793	0.394217	0.471329	0.934486	0.59882	1.02627
C6orf52	881	0.937349	-1.63372	0.0400531	0.299679	0	0.124973	0.14883	0.310214	0.391034	0.442319	0.2952	0.141854	0.168933	0.352116	0.443853	0.502065	0.335074
MAF	6878	0.936326	-1.23123	0.0428933	0.307195	0	0.2678	0.233876	0.290826	0.195517	0.589759	0.738001	0.0389358	0.0340034	0.0422835	0.0284264	0.0857458	0.107299
CYP4F12	2081	0.936113	1.99783	1.39097e-06	0.00046523	0	2.80298	2.82777	2.52049	5.27896	5.30783	5.01841	1.34694	1.35885	1.21119	2.53674	2.55062	2.41154
IL34	1917	0.935727	-1.67793	0.030087	0.265071	0	0.16068	0.191353	0.213272	0.351931	0.463382	0.27675	0.0838185	0.0998189	0.111253	0.183584	0.241723	0.144366
MIR663AHG	1213	0.932599	1.47933	0.00503431	0.108791	0	0.999787	2.87029	1.88067	3.59751	3.77025	3.48705	0.824227	2.36628	1.55043	2.9658	3.1082	2.87474
IFI44	1726	0.930201	-0.141554	0.00854273	0.144537	0	0.339214	0.637843	0.833701	0.840723	1.4744	1.12545	0.196532	0.36955	0.483025	0.487093	0.854228	0.652058
STC1	3877	0.929673	0.870565	0.0297847	0.264079	0	1.339	1.4883	0.891866	2.93276	3.1173	1.0701	0.34537	0.383879	0.23004	0.75645	0.804049	0.276013
TNFRSF6B	1155	0.92903	-0.565399	0.0110204	0.162417	0	0.48204	0.255137	0.562264	1.05579	0.610822	0.830251	0.417351	0.220898	0.486808	0.914106	0.52885	0.718832
LOC101928718	2767	0.924312	-0.732438	0.00992296	0.154805	0	0.446334	0.467751	0.252049	0.91893	0.631885	0.664201	0.161306	0.169046	0.0910911	0.332103	0.228365	0.240044
DUOX2	6346	0.920388	-1.87089	0.0465892	0.317196	0	0.142827	0.170091	0.174496	0.215069	0.421257	0.2952	0.0225066	0.0268029	0.0274969	0.0338904	0.0663814	0.0465175
DCAF4L1	4772	0.918853	-1.48407	0.0291915	0.260934	0	0.249947	0.170091	0.232661	0.332379	0.337005	0.571951	0.0523778	0.0356436	0.0487554	0.0696519	0.0706214	0.119856
FAM178B	3007	0.916324	-1.06625	0.0218157	0.226776	0	0.42848	0.276398	0.193884	0.469241	0.484445	0.756451	0.142494	0.0919183	0.0644776	0.15605	0.161106	0.251563
CASC10	1989	0.915127	-1.27335	0.0239599	0.237613	0	0.196387	0.361444	0.232661	0.586551	0.547634	0.35055	0.0987364	0.181722	0.116974	0.294898	0.275331	0.176245
GBP2	4132	0.906838	-1.64776	0.0376358	0.292803	0	0.124973	0.255137	0.213272	0.371482	0.442319	0.2952	0.0302453	0.0617466	0.0516148	0.0899038	0.107047	0.0714425
LGALS12	2302	0.906437	-1.64888	0.0309115	0.267713	0	0.142827	0.191353	0.252049	0.391034	0.358068	0.35055	0.0620446	0.0831246	0.109491	0.169867	0.155547	0.152281
MIR1249	66	0.903239	-2.0357	0.0645503	0.364452	0	0.124973	0.0850457	0.213272	0.273724	0.231691	0.2952	1.89354	1.28857	3.2314	4.14733	3.51047	4.47273
LOC100129046	1562	0.902804	-0.830288	0.0225309	0.230889	0	0.2678	0.403967	0.426545	0.860275	0.358068	0.811801	0.171447	0.258622	0.273076	0.550752	0.229237	0.519719
LAMA3	11222	0.899888	-2.09457	0.0650517	0.366211	0	0.178533	0.127569	0.096942	0.312827	0.210628	0.23985	0.0159092	0.0113677	0.00863857	0.0278763	0.0187692	0.0213732
RNY4	96	0.898429	-0.982636	0.182833	0.558458	0	0.357067	0.361444	0.252049	0.195517	0.29488	1.2915	3.71945	3.76504	2.62551	2.03664	3.07166	13.4531
DAPP1	2999	0.898003	1.35693	2.71053e-05	0.00461152	0	1.58895	1.7647	1.93884	3.10872	3.18049	3.56085	0.529826	0.588429	0.646495	1.03659	1.06052	1.18735
AMICA1	2442	0.897453	1.34905	6.27391e-05	0.00776734	0	1.6068	1.59461	2.05517	3.73438	2.88561	3.1734	0.657986	0.652992	0.841593	1.52923	1.18166	1.29951
AIM1L	5245	0.891895	-0.619846	0.00531388	0.111767	0	0.37492	0.489013	0.426545	0.80162	0.716136	0.867151	0.0714815	0.0932341	0.0813241	0.152835	0.136537	0.165329
FAM83H-AS1	5474	0.886304	-0.998766	0.0183406	0.208951	0	0.339214	0.276398	0.348991	0.449689	0.505508	0.830251	0.0619681	0.050493	0.0637543	0.08215	0.0923471	0.151672
DNAJC9-AS1	2858	0.885019	-1.99662	0.0679934	0.372327	0	0.178533	0.127569	0.135719	0.23462	0.400194	0.20295	0.062468	0.0446356	0.0474873	0.0820925	0.140026	0.0710113
LINC00278	530	0.884647	-0.820621	0.00922345	0.148547	0	0.32136	0.467751	0.329603	0.68431	0.610822	0.756451	0.60634	0.88255	0.621892	1.29115	1.15249	1.42727
LOC401010	2734	0.884218	-2.15509	0.0786347	0.39234	0	0.0714134	0.170091	0.155107	0.254172	0.210628	0.2583	0.0261205	0.0622134	0.0567327	0.0929671	0.0770403	0.0944771
RGS17	1466	0.88246	-1.33365	0.0524861	0.334452	0	0.37492	0.255137	0.11633	0.664758	0.400194	0.3321	0.255744	0.174036	0.0793522	0.45345	0.272983	0.226535
TMEM191C	1307	0.882294	-0.871885	0.0107275	0.160567	0	0.32136	0.382706	0.36838	0.782068	0.505508	0.682651	0.245876	0.292812	0.281851	0.598369	0.38677	0.522304
PLCH2	13688	0.876402	0.344803	0.00100952	0.0458018	0	0.821254	0.978025	0.814313	1.93562	1.45334	1.4022	0.0599981	0.0714513	0.059491	0.14141	0.106176	0.10244
SNORD100	76	0.874274	0.0271011	0.00111766	0.0477236	0	0.678427	0.701627	0.697982	1.29041	1.32696	1.19925	8.92667	9.23193	9.18398	16.9791	17.46	15.7796
IL21R	5094	0.873308	0.820333	0.000308104	0.0226812	0	1.12476	1.31821	1.22147	2.46352	1.79034	2.4354	0.220801	0.258777	0.239786	0.483611	0.351461	0.478092
CPED1	5607	0.872028	-0.777358	0.0207095	0.222349	0	0.232093	0.616581	0.329603	0.664758	0.779325	0.682651	0.0413935	0.109966	0.0587842	0.118559	0.138991	0.12175
PHYHIP	3337	0.86853	-1.20845	0.0196015	0.215772	0	0.303507	0.340183	0.193884	0.508344	0.505508	0.516601	0.090952	0.101943	0.0581013	0.152336	0.151486	0.15481
PADI2	4363	0.864681	1.87539	2.28047e-05	0.00410806	0	2.57088	2.46632	2.6756	4.6142	3.91769	5.49811	0.589246	0.565282	0.613248	1.05758	0.897934	1.26017
SLC6A19	5172	0.863492	-2.05457	0.114968	0.462289	0	0.0892667	0.127569	0.213272	0.430138	0.14744	0.20295	0.0172596	0.0246652	0.041236	0.0831666	0.0285073	0.0392402
SLC30A8	5848	0.862264	-1.59076	0.0661274	0.368198	0	0.0892667	0.191353	0.348991	0.312827	0.421257	0.4059	0.0152645	0.0327211	0.059677	0.053493	0.0720343	0.0694084
JUP	3508	0.861148	3.88343	1.53814e-07	0.000109957	0	9.49798	12.1615	9.75236	19.3366	19.3567	18.284	2.70752	3.4668	2.78004	5.51215	5.51789	5.21208
RASL11A	1543	0.856658	-0.107818	0.00465495	0.105119	0	0.553454	0.510274	0.833701	0.997137	1.36908	1.08855	0.358687	0.330703	0.540312	0.646233	0.887287	0.705477
LINC00403	945	0.856415	-1.85409	0.0690155	0.37474	0	0.16068	0.255137	0.096942	0.23462	0.337005	0.35055	0.170032	0.269986	0.102584	0.248276	0.356619	0.370953
MIR148B	99	0.855906	-1.96122	0.0829466	0.403456	0	0.232093	0.0850457	0.135719	0.195517	0.315942	0.3321	2.34438	0.859047	1.3709	1.97492	3.19134	3.35455
SLC7A7	2718	0.854335	1.45301	3.07896e-05	0.00518077	0	1.74963	1.87101	2.15211	3.4802	3.39112	3.56085	0.643719	0.688376	0.7918	1.28043	1.24765	1.3101
TLCD1	1197	0.85269	-1.90692	0.0598359	0.353729	0	0.16068	0.14883	0.174496	0.371482	0.210628	0.2952	0.134236	0.124336	0.145777	0.310345	0.175964	0.246617
TMEM156	1933	0.852337	-1.19983	0.046365	0.316635	0	0.48204	0.14883	0.193884	0.469241	0.526571	0.535051	0.249374	0.0769943	0.100302	0.242753	0.272411	0.276798
TSC22D1-AS1	2842	0.851411	-0.73968	0.0182829	0.20845	0	0.517747	0.403967	0.271438	0.566999	0.947827	0.664201	0.182177	0.142142	0.0955094	0.199507	0.333507	0.233709
CFAP47	10646	0.849529	-1.72717	0.0929765	0.424184	0	0.285654	0.127569	0.135719	0.410586	0.14744	0.442801	0.026832	0.0119828	0.0127483	0.0385671	0.0138493	0.0415931
ABCB4	3988	0.848418	0.181711	0.00170294	0.0599436	0	0.731987	0.829195	0.794924	1.27086	1.72715	1.2546	0.183547	0.207923	0.199329	0.318671	0.433087	0.314594
PCDHB16	4532	0.848117	-1.6795	0.050751	0.329279	0	0.178533	0.233876	0.174496	0.273724	0.29488	0.479701	0.039394	0.0516054	0.038503	0.060398	0.0650661	0.105847
GOLGA7B	6448	0.843643	-1.16687	0.020778	0.222796	0	0.357067	0.255137	0.252049	0.586551	0.442319	0.535051	0.0553764	0.0395684	0.0390895	0.0909664	0.0685979	0.0829793
C11orf21	2262	0.843187	0.0310978	0.00360127	0.0912959	0	0.8034	0.722888	0.581652	0.958034	1.4744	1.3653	0.355173	0.319579	0.257141	0.423534	0.651812	0.603582
KCNK9	4428	0.838707	-0.296688	0.00478598	0.106969	0	0.571307	0.616581	0.48471	1.0949	1.0742	0.830251	0.129021	0.139246	0.109465	0.247266	0.242594	0.1875
PEAR1	4866	0.834054	-1.23248	0.0327755	0.275595	0	0.357067	0.191353	0.271438	0.527896	0.358068	0.590401	0.07338	0.0393245	0.0557825	0.108487	0.0735857	0.121332
BAIAP2	4897	0.832955	3.29789	4.49632e-07	0.000196708	0	6.6593	7.65411	6.84411	13.7057	11.2897	12.6383	1.35987	1.56302	1.39761	2.7988	2.30543	2.58082
C11orf72	2431	0.826368	-1.05528	0.0423808	0.305833	0	0.21424	0.318921	0.426545	0.703861	0.315942	0.664201	0.0881284	0.131189	0.175461	0.289536	0.129964	0.273221
PLLP	1497	0.82621	-1.74059	0.0508821	0.329514	0	0.232093	0.191353	0.135719	0.351931	0.337005	0.31365	0.155039	0.127824	0.0906605	0.235091	0.22512	0.209519
UNC13C	8140	0.820157	1.58937	0.000111955	0.0109189	0	1.85675	2.31749	2.28783	3.14782	3.89662	4.33575	0.228102	0.284705	0.28106	0.386711	0.478701	0.532648
HABP2	3149	0.819838	-1.66324	0.0655504	0.367701	0	0.232093	0.191353	0.174496	0.430138	0.442319	0.20295	0.0737039	0.0607662	0.055413	0.136595	0.140463	0.0644491
LINC00892	689	0.819384	0.170346	0.00395074	0.0961085	0	0.64272	1.04181	0.697982	1.50548	1.53759	1.1439	0.932831	1.51206	1.01304	2.18502	2.23162	1.66023
P2RY10	1790	0.818436	-0.347242	0.00897739	0.146548	0	0.714134	0.403967	0.48471	0.899378	0.884639	1.0701	0.398957	0.22568	0.270788	0.502446	0.494212	0.597822
VNN2	2269	0.817176	-0.172939	0.00793822	0.138125	0	0.5356	0.680365	0.639817	0.997137	1.45334	0.830251	0.236051	0.299853	0.281982	0.439461	0.640518	0.365911
RPS10-NUDT3	2527	0.813866	-0.391582	0.00953523	0.151299	0	0.517747	0.659104	0.407156	1.01669	1.01102	0.756451	0.204886	0.260825	0.161122	0.40233	0.400085	0.299347
NKG7	826	0.810167	1.91079	1.09206e-05	0.00242342	0	2.83868	2.48759	2.77254	4.90748	4.61276	4.70476	3.43666	3.01161	3.35659	5.94126	5.58446	5.69583
MIR634	97	0.809116	-1.50678	0.0897483	0.417952	0	0.178533	0.382706	0.135719	0.527896	0.463382	0.2214	1.84055	3.94542	1.39916	5.44223	4.77714	2.28248
ADAMTS12	4955	0.806583	-2.03469	0.0797109	0.394867	0	0.124973	0.14883	0.174496	0.23462	0.315942	0.23985	0.0252217	0.0300363	0.0352161	0.0473502	0.0637624	0.0484057
FBXO40	5722	0.806506	-1.70996	0.0531954	0.337558	0	0.249947	0.170091	0.155107	0.332379	0.337005	0.35055	0.0436817	0.0297259	0.0271072	0.0580879	0.0588964	0.0612636
PLCE1	8342	0.805457	1.35605	9.56922e-05	0.00982946	0	2.01743	1.55208	1.91945	3.24558	3.30686	3.08115	0.24184	0.186057	0.230095	0.389065	0.396411	0.369354
CYTH4	3138	0.803743	2.39104	1.20784e-05	0.00253348	0	3.19575	4.40111	3.81951	6.66713	6.25566	6.93721	1.0184	1.40252	1.21718	2.12464	1.99352	2.21071
KCNJ1	2908	0.803432	-1.54891	0.0846127	0.406523	0	0.232093	0.318921	0.11633	0.215069	0.505508	0.442801	0.0798121	0.10967	0.0400036	0.0739576	0.173834	0.15227
AKR1C2	4155	0.802481	-0.678985	0.0195925	0.215772	0	0.464187	0.44649	0.36838	0.488793	0.863576	0.885601	0.111718	0.107458	0.0886593	0.11764	0.20784	0.213141
PTCH2	4634	0.801397	2.65488	0.245694	0.623792	0	3.85632	5.76184	4.11034	3.89079	5.62378	14.2065	0.83218	1.24338	0.886996	0.839618	1.21359	3.06571
POTEF	4337	0.801146	-1.97709	0.185615	0.562018	0	0.0178533	0.255137	0.213272	0.410586	0.210628	0.20295	0.00411652	0.058828	0.0491751	0.0946705	0.0485654	0.0467951
HOXB-AS1	797	0.80061	-1.78856	0.119316	0.468935	0	0.16068	0.29766	0.096942	0.410586	0.14744	0.38745	0.201606	0.373475	0.121634	0.515164	0.184993	0.486136
SNORD99	80	0.798841	-0.757323	0.0508948	0.329514	0	0.410627	0.531536	0.271438	0.391034	0.610822	1.08855	5.13284	6.64419	3.39297	4.88793	7.63528	13.6069
MIR3671	88	0.79669	-2.09279	0.12689	0.480612	0	0.0714134	0.14883	0.213272	0.254172	0.337005	0.16605	0.811516	1.69125	2.42355	2.88832	3.82961	1.88693
KIAA1211L	3869	0.79613	-1.5903	0.0650339	0.366211	0	0.196387	0.318921	0.135719	0.312827	0.463382	0.35055	0.0507591	0.0824299	0.0350785	0.0808548	0.119768	0.0906049
ERICH5	1550	0.79593	0.43852	0.00142361	0.0543456	0	0.999787	0.999287	0.891866	1.50548	1.97991	1.5498	0.645024	0.644701	0.575398	0.971278	1.27736	0.999872
UBE2MP1	961	0.795794	-2.03315	0.149968	0.517409	0	0.05356	0.29766	0.11633	0.23462	0.337005	0.2214	0.0557336	0.30974	0.121051	0.244142	0.350682	0.230385
CERS3	4240	0.795765	-1.38191	0.0406132	0.301327	0	0.2678	0.170091	0.310214	0.371482	0.463382	0.479701	0.0631604	0.0401159	0.0731638	0.0876138	0.109288	0.113137
RASD1	1746	0.793437	-0.2689	0.0163968	0.198136	0	0.714134	0.510274	0.504098	0.664758	1.36908	0.996301	0.409011	0.292253	0.288716	0.380732	0.784126	0.570619
C1orf189	705	0.793038	-1.56563	0.0948464	0.427906	0	0.357067	0.0637843	0.213272	0.391034	0.337005	0.4059	0.506478	0.0904741	0.302514	0.554658	0.478022	0.575745
LTB	7146	0.792509	1.08542	0.0003814	0.0246413	0	1.66036	1.23316	1.6674	2.48307	2.99092	2.4723	0.232348	0.172567	0.233334	0.347476	0.418545	0.34597
GADD45G	1065	0.792319	-2.03518	0.110526	0.45573	0	0.0892667	0.212614	0.155107	0.23462	0.189565	0.35055	0.0838185	0.199638	0.145641	0.220301	0.177996	0.329155
IL12RB1	3616	0.791234	0.952996	0.000326548	0.0234747	0	1.41041	1.46704	1.29902	2.3071	2.73817	2.19555	0.390048	0.405707	0.359243	0.638026	0.757237	0.607177
ENC1	5728	0.789636	-0.0758038	0.00664629	0.125176	0	0.624867	0.574058	0.794924	1.03624	0.96889	1.4391	0.10909	0.10022	0.138779	0.180908	0.16915	0.25124
SEMA3G	4700	0.789121	2.06708	2.23164e-05	0.00406796	0	2.89224	3.48687	2.77254	5.47448	4.78126	5.51656	0.615371	0.741888	0.589902	1.16478	1.01729	1.17374
CDH15	2859	0.787769	-1.80472	0.0636855	0.361703	0	0.21424	0.191353	0.135719	0.312827	0.315942	0.31365	0.0749353	0.06693	0.0474707	0.109418	0.110508	0.109706
LIFR	10403	0.785964	1.61639	7.07061e-05	0.00830874	0	2.57088	2.08362	1.99701	3.63662	3.91769	3.9483	0.247129	0.20029	0.191964	0.349574	0.376592	0.379535
SORCS2	6053	0.785933	-1.31108	0.0919349	0.422025	0	0.21424	0.318921	0.271438	0.23462	0.337005	0.793351	0.035394	0.0526881	0.0448435	0.038761	0.0556757	0.131067
ITGB6	4687	0.785336	-0.641955	0.0379997	0.29416	0	0.303507	0.44649	0.581652	0.449689	0.779325	1.05165	0.064755	0.0952613	0.124099	0.0959439	0.166274	0.224376
F2RL1	2883	0.785162	0.835501	0.000666721	0.0358204	0	1.23188	1.25442	1.35719	2.42441	1.79034	2.3985	0.427291	0.435111	0.470755	0.840934	0.620999	0.831947
FPR1	1371	0.783557	-1.08326	0.0285978	0.258269	0	0.249947	0.382706	0.329603	0.664758	0.484445	0.498151	0.18231	0.279143	0.24041	0.484871	0.353352	0.363348
SLC7A8	4889	0.782395	2.48569	6.3947e-06	0.00160518	0	3.82062	4.27355	4.18789	7.13637	6.25566	7.69366	0.781472	0.874114	0.856595	1.45968	1.27954	1.57367
TPI1P3	1214	0.782332	-1.45417	0.0761982	0.387556	0	0.196387	0.340183	0.193884	0.430138	0.589759	0.23985	0.161768	0.280216	0.159707	0.354314	0.485798	0.19757
TMEM183B	1691	0.78164	-1.39461	0.0629433	0.360875	0	0.32136	0.106307	0.310214	0.469241	0.442319	0.38745	0.190042	0.0628664	0.18345	0.277493	0.261573	0.229125
MGC12916	2006	0.779824	-0.224808	0.00878352	0.145871	0	0.517747	0.489013	0.794924	1.134	0.989953	0.977851	0.258099	0.243775	0.396273	0.565304	0.493496	0.487463
LINC01094	4286	0.77922	-2.33229	0.161765	0.531532	0	0.05356	0.212614	0.096942	0.195517	0.210628	0.20295	0.0124965	0.0496067	0.0226183	0.0456176	0.0491433	0.0473519
MMP28	6135	0.777295	-0.717058	0.0133617	0.179965	0	0.446334	0.361444	0.445933	0.723413	0.758262	0.682651	0.072752	0.0589151	0.0726867	0.117916	0.123596	0.111272
OVOL1	3022	0.776997	-1.94157	0.125885	0.479605	0	0.0892667	0.255137	0.155107	0.391034	0.168503	0.27675	0.029539	0.0844266	0.051326	0.129396	0.0557587	0.0915785
LOC101928279	2386	0.776815	-1.00763	0.0399125	0.299679	0	0.2678	0.318921	0.426545	0.449689	0.463382	0.811801	0.112238	0.133664	0.17877	0.18847	0.194209	0.340235
HNF4A	5470	0.776307	-1.6053	0.054472	0.340305	0	0.232093	0.233876	0.174496	0.410586	0.400194	0.2952	0.0424303	0.0427561	0.0319005	0.0750614	0.0731616	0.0539672
ST8SIA6	1398	0.774897	0.31805	0.00681982	0.126576	0	1.01764	0.765411	0.872478	1.93562	1.01102	1.60515	0.727926	0.547504	0.62409	1.38456	0.723187	1.14818
SNORA78	127	0.774856	-1.80359	0.125516	0.479396	0	0.124973	0.318921	0.11633	0.175965	0.358068	0.4059	0.984043	2.51119	0.915987	1.38555	2.81943	3.19607
ST6GALNAC1	2714	0.774544	1.72529	0.000108664	0.0107089	0	2.16025	2.91281	2.19089	3.75393	4.29682	4.33575	0.795967	1.07326	0.807255	1.38317	1.5832	1.59755
RFX4	4377	0.773142	-2.21807	0.20695	0.583946	0	0.10712	0.212614	0.0775536	0.0782068	0.400194	0.20295	0.0244734	0.0485753	0.0177184	0.0178677	0.0914311	0.0463674
ZNF32-AS2	905	0.772788	-1.22801	0.0807197	0.398061	0	0.21424	0.510274	0.155107	0.606103	0.526571	0.35055	0.236729	0.563839	0.171389	0.669727	0.581846	0.387349
LOC101928414	672	0.772532	-1.00679	0.0438533	0.310153	0	0.232093	0.403967	0.387768	0.703861	0.358068	0.664201	0.345377	0.601141	0.577036	1.04741	0.532839	0.988394
SNORD51	70	0.769955	-1.45556	0.082538	0.402613	0	0.124973	0.29766	0.310214	0.254172	0.484445	0.498151	1.78533	4.25228	4.43163	3.63103	6.92064	7.11644
DAB1	2580	0.765944	1.83359	4.13877e-05	0.0064013	0	2.89224	2.40254	2.52049	4.65331	4.06513	4.59406	1.12102	0.931217	0.976935	1.80361	1.57563	1.78064
SNORA33	133	0.764675	1.36758	0.000894332	0.0423963	0	2.05313	1.42452	2.15211	2.58083	3.83344	3.2103	15.4371	10.7106	16.1813	19.4047	28.8228	24.1376
GAS2L2	3014	0.764076	-0.767244	0.0380245	0.29416	0	0.553454	0.29766	0.348991	0.742965	0.442319	0.867151	0.183628	0.0987591	0.11579	0.246505	0.146755	0.287708
GIMAP5	1877	0.762496	1.63459	0.000252079	0.0203193	0	1.99957	2.72146	2.13272	3.22603	4.23363	4.1328	1.0653	1.4499	1.13624	1.71872	2.25553	2.20181
SLC32A1	2574	0.76023	-1.33371	0.0388763	0.296668	0	0.249947	0.233876	0.310214	0.449689	0.400194	0.498151	0.0971044	0.0908608	0.120518	0.174704	0.155475	0.193532
MPZL2	3188	0.758602	-0.029361	0.0151572	0.189613	0	0.946227	0.59532	0.542875	1.15355	1.53759	0.885601	0.296809	0.186738	0.170287	0.361841	0.482304	0.277792
VIL1	2738	0.758234	-1.04479	0.0497384	0.326448	0	0.285654	0.382706	0.329603	0.821172	0.358068	0.498151	0.104329	0.139776	0.120381	0.299917	0.130777	0.18194
COL6A4P1	2249	0.757575	-0.769244	0.0330393	0.276296	0	0.357067	0.467751	0.407156	0.606103	0.989953	0.498151	0.158767	0.207982	0.181039	0.269499	0.440175	0.221499
INPP5J	3595	0.754481	-2.11481	0.137157	0.497196	0	0.10712	0.0850457	0.232661	0.254172	0.189565	0.27675	0.029797	0.0236567	0.0647179	0.0707016	0.0527303	0.076982
FOXL1	3190	0.753791	-1.46847	0.0621849	0.359447	0	0.196387	0.29766	0.232661	0.527896	0.400194	0.2952	0.0615633	0.0933103	0.0729344	0.165485	0.125453	0.0925393
ANGPTL4	1905	0.752706	0.733365	0.00314207	0.0850907	0	1.30329	1.44578	0.891866	2.32665	2.19053	1.6236	0.684144	0.758938	0.468171	1.22134	1.14989	0.852284
SH3BP5	3559	0.7526	5.52584	1.16215e-08	1.77948e-05	0	34.5284	33.9545	34.395	54.256	55.6059	63.4496	9.7017	9.54046	9.66424	15.2447	15.624	17.8279
GZMA	896	0.751083	3.62424	3.4736e-06	0.000949782	0	8.17683	9.92908	9.42276	13.1192	16.9135	16.2545	9.12593	11.0816	10.5165	14.642	18.8766	18.1411
PROM1	4307	0.750105	-1.62105	0.0718286	0.377949	0	0.232093	0.127569	0.271438	0.332379	0.337005	0.4059	0.0538875	0.0296189	0.0630224	0.0771718	0.0782459	0.094242
PTGDR2	2910	0.748406	1.07057	0.000485455	0.0290359	0	1.73177	1.27569	1.58985	2.40486	2.71711	2.63835	0.595111	0.43838	0.54634	0.826412	0.933713	0.906651
GIMAP4	1965	0.747881	6.28896	1.07476e-08	1.77948e-05	0	55.7738	59.7233	59.5418	94.9626	108.116	90.8848	28.3836	30.3936	30.3012	48.327	55.0206	46.2518
COL27A1	7810	0.746091	3.12268	1.26786e-06	0.000451475	0	6.6593	5.9532	6.80533	10.9685	10.2365	11.3837	0.852663	0.762253	0.871361	1.40442	1.3107	1.45758
PAQR9	2106	0.745733	-1.87209	0.112409	0.458132	0	0.178533	0.14883	0.193884	0.156414	0.337005	0.38745	0.0847737	0.0706695	0.0920627	0.0742705	0.160022	0.183975
ZSCAN4	2246	0.74539	-1.78895	0.0908741	0.420763	0	0.2678	0.127569	0.155107	0.273724	0.358068	0.31365	0.119234	0.0567981	0.0690593	0.121872	0.159425	0.139648
C16orf71	2706	0.745215	-1.73967	0.0816335	0.400761	0	0.142827	0.212614	0.232661	0.254172	0.400194	0.3321	0.0527815	0.0785714	0.0859796	0.0939291	0.147891	0.122727
DPP4	3900	0.744818	-2.17504	0.22996	0.610993	0	0.10712	0.212614	0.096942	0.391034	0.252754	0.0553501	0.0274667	0.0545165	0.0248569	0.100265	0.0648087	0.0141923
ADGRG3	2670	0.743188	-0.905151	0.0266723	0.252103	0	0.285654	0.467751	0.36838	0.625655	0.631885	0.608851	0.106986	0.175188	0.13797	0.234328	0.236661	0.228034
RNU5B-1	117	0.742557	3.8655	0.332708	0.698021	0	7.89118	14.3302	10.5085	8.56365	11.2686	34.52	67.446	122.48	89.8163	73.1936	96.3129	295.043
CX3CR1	3657	0.741236	1.45408	0.0005258	0.0309656	0	1.55324	2.21119	2.32661	3.06962	3.30686	3.7638	0.424731	0.604645	0.636207	0.839381	0.904256	1.02921
C6orf25	17809	0.740436	-0.753994	0.0281351	0.257907	0	0.37492	0.552797	0.329603	0.703861	0.82145	0.571951	0.0210523	0.0310403	0.0185077	0.0395228	0.0461256	0.0321158
CSRP2	923	0.740034	1.6351	0.000180728	0.0162235	0	2.53517	1.97731	2.36538	3.94944	4.23363	3.3579	2.74667	2.14227	2.56271	4.27892	4.58681	3.63803
FRK	2849	0.739583	-0.69571	0.026596	0.251893	0	0.42848	0.318921	0.542875	0.742965	0.568696	0.848701	0.150397	0.111941	0.190549	0.260781	0.199613	0.297894
IZUMO4	1015	0.739408	2.98606	0.000103811	0.0104575	0	5.5881	5.57049	6.57267	10.7925	11.395	7.47226	5.50551	5.48817	6.47553	10.633	11.2266	7.36183
HM13-AS1	489	0.737637	-1.74176	0.140897	0.504069	0	0.142827	0.127569	0.310214	0.391034	0.14744	0.42435	0.292079	0.260876	0.634385	0.799661	0.301513	0.867792
TNFSF9	1665	0.736763	3.70469	4.63699e-07	0.000197227	0	9.46227	10.0354	9.77175	16.9122	17.1873	14.6862	5.68305	6.02726	5.86892	10.1575	10.3227	8.82055
NFAM1	5604	0.735566	-1.34509	0.102964	0.442487	0	0.285654	0.361444	0.155107	0.215069	0.505508	0.608851	0.0509731	0.0644975	0.0276779	0.0383777	0.0902048	0.108646
GPX7	1229	0.732871	-1.62215	0.148227	0.514661	0	0.249947	0.255137	0.135719	0.351931	0.126377	0.571951	0.203374	0.207597	0.11043	0.286355	0.102829	0.465379
KIAA0319	7172	0.732743	0.924734	0.00472613	0.105901	0	1.26759	1.10559	1.80312	2.09203	1.83247	3.00735	0.176741	0.154154	0.251411	0.291694	0.255503	0.419319
SERTAD1	1205	0.73264	2.68275	7.17224e-06	0.00171596	0	4.74899	4.99643	4.65322	8.83737	7.85644	7.23241	3.94107	4.14642	3.86159	7.33392	6.51986	6.002
FAM26F	1132	0.73172	0.0109368	0.0203618	0.220659	0	0.660574	0.637843	0.891866	1.34907	1.57971	0.738001	0.583546	0.563465	0.787868	1.19176	1.39551	0.651944
CACNA1G	8267	0.726814	-1.54969	0.10583	0.447872	0	0.21424	0.361444	0.11633	0.312827	0.315942	0.498151	0.0259151	0.0437213	0.0140717	0.0378405	0.0382173	0.0602577
CD37	1243	0.726768	0.985386	0.00102508	0.0461647	0	1.49968	1.59461	1.29902	2.8741	2.27479	2.12175	1.2065	1.28287	1.04507	2.31223	1.83008	1.70696
FLJ42102	2162	0.725875	-1.78898	0.123529	0.476665	0	0.178533	0.233876	0.155107	0.410586	0.14744	0.369	0.0825779	0.108176	0.0717425	0.18991	0.068196	0.170675
PACSIN1	4498	0.725764	1.11286	0.0122019	0.170782	0	1.67821	1.19064	1.90006	2.67858	1.6429	3.56085	0.373102	0.264704	0.422424	0.595506	0.365251	0.791653
SNHG12	739	0.725537	3.74779	1.62838e-07	0.000109957	0	10.23	10.0354	10.0238	17.1468	16.4711	16.4759	13.843	13.5797	13.564	23.2028	22.2884	22.2948
FAM209B	692	0.722627	-1.1343	0.0785153	0.392113	0	0.42848	0.191353	0.310214	0.410586	0.779325	0.38745	0.619191	0.276521	0.448287	0.593332	1.12619	0.559899
LOC653786	2661	0.722588	-0.829842	0.0333884	0.27824	0	0.339214	0.340183	0.504098	0.527896	0.631885	0.793351	0.127476	0.12784	0.189439	0.198383	0.237461	0.29814
SNORD36B	71	0.722563	-0.907761	0.0634824	0.361623	0	0.517747	0.233876	0.348991	0.371482	0.758262	0.719551	7.29221	3.29402	4.91537	5.23215	10.6797	10.1345
BFSP1	3009	0.722558	-0.807422	0.056773	0.345487	0	0.42848	0.318921	0.445933	0.508344	0.442319	1.01475	0.1424	0.105989	0.1482	0.168941	0.146999	0.337239
PTGER3	10280	0.718557	3.49175	2.68915e-06	0.000762524	0	8.034	7.97303	9.42276	13.5298	15.4391	12.915	0.781518	0.775587	0.916611	1.31613	1.50185	1.25632
CRYM	1559	0.718548	-2.13513	0.126076	0.479867	0	0.142827	0.106307	0.174496	0.254172	0.210628	0.23985	0.0916143	0.0681893	0.111928	0.163035	0.135105	0.153849
MT1X	404	0.718062	3.25618	4.08861e-05	0.0064013	0	7.03422	5.99572	8.5309	13.1779	10.1523	12.1586	17.4114	14.8409	21.1161	32.6184	25.1294	30.0955
LOC154761	2527	0.715836	-1.59134	0.0989983	0.434843	0	0.124973	0.29766	0.252049	0.351931	0.273817	0.461251	0.0494552	0.117792	0.0997425	0.139268	0.108356	0.182529
ARHGEF4	4247	0.715748	-1.97804	0.160777	0.530335	0	0.0714134	0.170091	0.252049	0.371482	0.210628	0.2214	0.016815	0.0400498	0.0593476	0.0874694	0.0495946	0.052131
GPR84	1509	0.714779	-0.473889	0.0399431	0.299679	0	0.37492	0.829195	0.36838	0.782068	0.82145	0.940951	0.248456	0.5495	0.244122	0.518269	0.544367	0.623559
CNN1	1908	0.714671	-1.83826	0.134106	0.491956	0	0.142827	0.212614	0.193884	0.175965	0.252754	0.461251	0.0748568	0.111433	0.101616	0.092225	0.132471	0.241746
FEZ1	3031	0.714513	-1.49466	0.0833545	0.404028	0	0.21424	0.233876	0.271438	0.273724	0.568696	0.35055	0.070683	0.0771612	0.0895538	0.0903081	0.187627	0.115655
LINC00987	2469	0.713771	0.186329	0.0160921	0.196962	0	0.731987	1.19064	0.60104	1.68145	1.3059	1.12545	0.296471	0.482236	0.243435	0.681023	0.528917	0.455833
SYN1	3210	0.713483	1.50986	0.000417158	0.0261784	0	2.35664	1.93479	2.07456	3.969	2.88561	3.59775	0.734156	0.602738	0.64628	1.23645	0.898943	1.1208
CD52	505	0.712091	2.93486	1.01696e-05	0.00230597	0	5.21318	5.57049	6.53389	9.07199	10.3419	8.96671	10.3231	11.0307	12.9384	17.9643	20.4789	17.7559
PLAU	2690	0.71184	1.27344	0.00061334	0.0341933	0	1.96387	1.63713	1.80312	2.9132	3.4543	2.52765	0.730062	0.608598	0.670305	1.08298	1.28413	0.939648
NEXN	3389	0.709641	0.386529	0.00265576	0.0792691	0	1.03549	0.935503	0.911255	1.54458	1.51652	1.6605	0.305546	0.276041	0.268886	0.455764	0.447484	0.489968
STEAP1	1313	0.708779	-0.755045	0.0259584	0.248594	0	0.37492	0.403967	0.48471	0.664758	0.800388	0.608851	0.285545	0.307667	0.369162	0.506289	0.609587	0.46371
XIST	19280	0.707515	-1.1052	0.064207	0.363452	0	0.42848	0.361444	0.174496	0.488793	0.463382	0.627301	0.0222241	0.0187471	0.0090506	0.0253523	0.0240344	0.0325363
TUBB2B	2019	0.705169	-1.75586	0.150061	0.517409	0	0.178533	0.340183	0.0775536	0.273724	0.273817	0.4059	0.0884267	0.168491	0.0384119	0.135574	0.13562	0.20104
EMP1	2804	0.703297	-1.18657	0.0581463	0.348716	0	0.2678	0.340183	0.310214	0.332379	0.589759	0.571951	0.0955065	0.121321	0.110633	0.118537	0.210328	0.203977
VGF	2553	0.702664	-0.369217	0.0302923	0.265625	0	0.37492	0.59532	0.717371	0.997137	0.674011	1.05165	0.146855	0.233184	0.280991	0.390575	0.264007	0.411928
ZBTB32	1960	0.702654	-1.36995	0.0663754	0.368792	0	0.32136	0.212614	0.252049	0.547448	0.358068	0.38745	0.163959	0.108477	0.128597	0.27931	0.182688	0.197679
IL31RA	4400	0.701486	-1.10419	0.0553418	0.342243	0	0.339214	0.425228	0.213272	0.469241	0.484445	0.627301	0.077094	0.0966428	0.048471	0.106646	0.110101	0.142568
MIR4437	60	0.70122	-1.94034	0.15916	0.528989	0	0.124973	0.255137	0.135719	0.332379	0.358068	0.1476	2.08289	4.25228	2.26198	5.53965	5.9678	2.46
DPH6-AS1	1477	0.700238	-2.50918	0.328977	0.695131	0	0.0357067	0.0637843	0.213272	0.0391034	0.210628	0.2583	0.0241751	0.043185	0.144396	0.0264749	0.142605	0.174882
TRIM22	3091	0.698966	1.39866	0.000291641	0.022107	0	2.19596	1.89227	1.8419	3.42155	3.01198	3.2103	0.710437	0.612186	0.595891	1.10694	0.974437	1.0386
CYP2S1	2624	0.698901	-1.72323	0.131162	0.487635	0	0.142827	0.276398	0.193884	0.195517	0.484445	0.31365	0.0544309	0.105335	0.0738887	0.0745111	0.184621	0.119531
PCDH19	9756	0.69732	1.00272	0.00652857	0.123603	0	1.0712	1.72218	1.72557	2.69814	1.72715	2.8413	0.109799	0.176525	0.176872	0.276562	0.177035	0.291236
PPM1J	1714	0.696648	-1.08576	0.0539702	0.339386	0	0.357067	0.233876	0.387768	0.508344	0.421257	0.664201	0.208324	0.13645	0.226236	0.296584	0.245774	0.387515
SVEP1	12343	0.696577	-1.72434	0.105133	0.446201	0	0.142827	0.212614	0.252049	0.23462	0.379131	0.369	0.0115715	0.0172255	0.0204204	0.0190084	0.0307163	0.0298955
EPHB4	4351	0.695895	0.526848	0.00534221	0.112208	0	1.32115	1.10559	0.775536	1.7401	1.76928	1.6974	0.303642	0.254101	0.178243	0.399931	0.406637	0.390118
AKR1C3	1980	0.695769	0.0588287	0.00814263	0.139619	0	0.64272	0.829195	0.833701	1.07534	1.26377	1.38375	0.324606	0.418786	0.421061	0.543103	0.638268	0.698864
SGK1	3965	0.695672	2.0663	4.28711e-05	0.00643571	0	3.01722	3.01912	3.47052	5.00524	5.3289	5.07376	0.760962	0.761443	0.87529	1.26235	1.34398	1.27964
MAGEA10	2743	0.694403	-0.941793	0.0437292	0.309419	0	0.42848	0.361444	0.310214	0.449689	0.737199	0.608851	0.156209	0.13177	0.113093	0.163941	0.268757	0.221965
RNU5F-1	116	0.694303	1.28196	0.0066593	0.125267	0	1.71392	2.36002	1.43474	2.11158	2.96986	3.78225	14.7752	20.345	12.3685	18.2033	25.6022	32.6056
CCDC73	4032	0.693088	-2.30942	0.279801	0.65279	0	0.0714134	0.276398	0.0387768	0.215069	0.105314	0.27675	0.0177117	0.0685512	0.00961726	0.0533405	0.0261196	0.0686385
B3GNT4	1504	0.69288	0.423564	0.013026	0.177608	0	0.856961	1.44578	0.717371	1.62279	1.8114	1.42065	0.569788	0.961288	0.476975	1.07898	1.20439	0.944582
ABTB2	4903	0.690286	2.90796	3.77364e-06	0.00101372	0	5.51668	5.71932	5.91346	8.73961	9.3519	9.57556	1.12516	1.16649	1.20609	1.7825	1.90738	1.953
NPDC1	1528	0.690169	3.25443	1.87067e-06	0.000561642	0	7.40914	7.67537	6.74716	11.6137	12.1743	11.439	4.84891	5.02315	4.41568	7.6006	7.96748	7.48627
C18orf65	2076	0.69012	-1.53608	0.0920303	0.422025	0	0.178533	0.276398	0.252049	0.273724	0.358068	0.498151	0.0859988	0.13314	0.121411	0.131852	0.17248	0.239957
ERG	7683	0.690006	0.846881	0.00674801	0.125597	0	1.73177	1.44578	0.85309	2.38531	2.14841	1.9926	0.225403	0.188179	0.111036	0.310466	0.279631	0.259352
MAPK8IP1	3205	0.689348	1.51123	0.000304116	0.0226812	0	2.07099	2.38128	2.01639	3.26513	3.2858	3.85605	0.646174	0.742989	0.62914	1.01876	1.02521	1.20314
GLDN	5083	0.689338	-1.1461	0.060683	0.355381	0	0.37492	0.212614	0.348991	0.391034	0.547634	0.590401	0.0737596	0.0418285	0.0686585	0.0769298	0.107738	0.116152
TFCP2L1	9286	0.689063	-0.224657	0.0268711	0.252734	0	0.446334	0.765411	0.678594	1.19265	0.716136	1.107	0.0480652	0.0824264	0.0730771	0.128436	0.07712	0.119212
SNORA16A	134	0.686783	1.63039	0.00018596	0.0163646	0	2.37449	2.16866	2.48172	3.49976	4.08619	3.74535	17.7201	16.1841	18.5203	26.1176	30.4939	27.9504
CD68	1856	0.685821	3.02981	5.58365e-06	0.00142495	0	6.07014	6.35716	6.28184	9.24796	11.1001	9.76006	3.27055	3.4252	3.38461	4.98274	5.98066	5.25865
RETN	478	0.685416	1.25246	0.00164327	0.0592042	0	1.76748	2.21119	1.43474	2.46352	3.15942	3.0627	3.69766	4.62592	3.00155	5.1538	6.60968	6.40733
LINC01163	3011	0.685393	0.834117	0.00351013	0.0903314	0	1.49968	1.29695	1.20208	2.50262	1.62184	2.30625	0.498067	0.430736	0.39923	0.831159	0.538638	0.765942
SELM	691	0.684956	0.802486	0.00302857	0.0835559	0	1.339	1.31821	1.26025	1.91607	1.74821	2.6199	1.93777	1.90768	1.8238	2.77289	2.52998	3.79147
KCNJ5	2899	0.682659	-1.04257	0.0668518	0.370077	0	0.32136	0.425228	0.290826	0.606103	0.716136	0.35055	0.110852	0.146681	0.100319	0.209073	0.247029	0.120921
CHRNA2	4067	0.681921	-1.854	0.151947	0.519642	0	0.10712	0.276398	0.174496	0.195517	0.29488	0.38745	0.0263388	0.0679613	0.0429052	0.048074	0.0725054	0.0952669
RPP40	1185	0.680465	2.39528	5.3043e-05	0.00725173	0	4.05271	3.61444	4.36239	5.7091	7.05605	6.54976	3.42001	3.05016	3.68134	4.8178	5.95447	5.52722
KCP	5400	0.679844	1.97069	0.000261844	0.0208228	0	2.69585	3.61444	2.6756	4.36003	5.20252	4.79701	0.499232	0.669341	0.495481	0.807413	0.96343	0.888334
GABRB2	7409	0.679225	1.72422	0.000265365	0.0209447	0	2.74942	2.06236	2.69499	4.0472	3.89662	4.11435	0.371091	0.278358	0.363745	0.546255	0.525931	0.555318
SLC16A2	4141	0.677931	-1.62129	0.166629	0.539413	0	0.178533	0.0850457	0.387768	0.449689	0.231691	0.369	0.0431136	0.0205375	0.0936411	0.108594	0.0559505	0.089109
LINC01108	3697	0.677411	-0.531667	0.0509571	0.329778	0	0.660574	0.361444	0.465322	0.527896	0.82145	1.05165	0.178678	0.0977669	0.125865	0.14279	0.222194	0.284461
SALL4	3484	0.675915	-1.44286	0.083381	0.404028	0	0.196387	0.318921	0.252049	0.508344	0.379131	0.3321	0.0563682	0.0915388	0.0723448	0.145908	0.108821	0.0953216
EBF2	4872	0.673868	-0.835526	0.0540888	0.339522	0	0.339214	0.510274	0.36838	0.469241	0.863576	0.608851	0.0696251	0.104736	0.0756116	0.0963138	0.177253	0.124969
IGSF22	4334	0.672328	-0.541748	0.0375036	0.292476	0	0.48204	0.659104	0.36838	0.625655	0.884639	0.885601	0.111223	0.152078	0.0849976	0.14436	0.204116	0.204338
MIR4489	62	0.672068	-1.872	0.150019	0.517409	0	0.2678	0.14883	0.11633	0.215069	0.379131	0.27675	4.31936	2.40048	1.8763	3.46885	6.11502	4.46371
PHACTR3	3379	0.671373	-1.95951	0.159696	0.529278	0	0.124973	0.127569	0.252049	0.293276	0.337005	0.1845	0.0369853	0.0377533	0.0745928	0.0867936	0.0997352	0.054602
PIK3IP1	2473	0.670777	2.09327	6.40414e-05	0.00776734	0	3.46355	2.93408	3.37358	5.1812	4.99189	5.40586	1.40055	1.18644	1.36417	2.09511	2.01856	2.18595
SOSTDC1	1869	0.669353	2.8896	5.04686e-05	0.00710678	0	5.96302	5.18779	5.91346	8.0162	10.742	8.45011	3.19049	2.7757	3.16397	4.28903	5.74748	4.52119
STPG1	3047	0.667624	-1.90827	0.228431	0.608464	0	0.21424	0.212614	0.096942	0.273724	0.0842513	0.461251	0.0703118	0.0697782	0.0318156	0.0898339	0.0276506	0.151379
DGCR6	2428	0.665239	0.13998	0.0113833	0.165236	0	0.8034	0.786673	0.872478	1.05579	1.22164	1.6236	0.33089	0.324	0.35934	0.43484	0.503148	0.668699
BST1	1480	0.663908	0.264059	0.0144739	0.185451	0	0.946227	0.786673	0.950032	1.40772	1.01102	1.82655	0.639343	0.531536	0.641913	0.951164	0.683119	1.23416
CNGA4	1911	0.66295	-1.70908	0.145555	0.510711	0	0.249947	0.191353	0.174496	0.175965	0.484445	0.3321	0.130794	0.100132	0.0913111	0.0920803	0.253503	0.173784
SIGLEC9	2020	0.662762	-1.39476	0.111304	0.456669	0	0.410627	0.233876	0.135719	0.449689	0.400194	0.4059	0.203281	0.11578	0.0671875	0.222618	0.198116	0.200941
FOSB	3776	0.6599	1.02629	0.00308396	0.084475	0	1.80319	1.25442	1.57046	2.11158	2.92773	2.3247	0.477539	0.33221	0.415906	0.559212	0.775353	0.615652
TMEM191A	1958	0.659777	0.911378	0.0027995	0.0812929	0	1.41041	1.46704	1.41535	1.89652	2.78029	2.12175	0.720334	0.749253	0.722857	0.968598	1.41997	1.08363
VIPR1	3369	0.659622	0.443612	0.00870455	0.145032	0	1.0712	1.23316	0.775536	1.42727	1.57971	1.845	0.317958	0.366032	0.230198	0.423649	0.468897	0.547641
SNORD14C	88	0.65959	-0.579028	0.0387233	0.296335	0	0.660574	0.361444	0.426545	0.840723	0.737199	0.738001	7.50652	4.10732	4.8471	9.55367	8.37726	8.38637
LOC100505622	685	0.658847	-1.08325	0.101826	0.440049	0	0.285654	0.255137	0.465322	0.762517	0.526571	0.31365	0.417012	0.372463	0.679302	1.11316	0.768716	0.457884
LSP1	3512	0.658656	5.3328	2.51556e-05	0.00437707	0	26.9764	34.6349	32.146	54.1582	52.0252	41.7524	7.68121	9.86186	9.15318	15.4209	14.8136	11.8885
SNORA61	130	0.657672	1.36387	0.00201598	0.0663656	0	1.74963	2.16866	1.99701	2.44396	3.05411	3.8007	13.4587	16.682	15.3616	18.7997	23.4932	29.2362
ZMYND12	1774	0.657121	-1.63364	0.125039	0.478649	0	0.178533	0.191353	0.290826	0.410586	0.421257	0.2214	0.100639	0.107865	0.163938	0.231446	0.237461	0.124803
CARD8-AS1	1963	0.65691	-0.640504	0.0422674	0.305678	0	0.339214	0.552797	0.523487	0.586551	0.82145	0.811801	0.172804	0.281608	0.266677	0.298803	0.418467	0.413551
TSACC	1199	0.654984	-1.05511	0.0611467	0.356542	0	0.303507	0.318921	0.407156	0.430138	0.505508	0.682651	0.253133	0.265989	0.33958	0.358747	0.421608	0.56935
TPTE2	2884	0.654261	-1.39382	0.0746835	0.383614	0	0.249947	0.233876	0.310214	0.469241	0.379131	0.4059	0.0866667	0.0810942	0.107564	0.162705	0.13146	0.140742
PDGFRB	5714	0.652443	1.7702	0.000729007	0.0377113	0	3.23146	2.27497	2.32661	4.41869	3.74918	4.18815	0.565533	0.39814	0.407177	0.773309	0.65614	0.732964
FAM171B	3555	0.652165	-0.670981	0.0461862	0.31652	0	0.410627	0.340183	0.620429	0.664758	0.842513	0.664201	0.115507	0.0956913	0.174523	0.186992	0.236994	0.186836
LINC00240	977	0.650572	-2.11391	0.258823	0.635112	0	0.178533	0.255137	0.0193884	0.195517	0.252754	0.2583	0.182736	0.261143	0.0198448	0.20012	0.258704	0.264381
OPCML	6545	0.650279	1.39359	0.00175134	0.0609465	0	2.08884	1.61587	2.32661	2.81545	3.72812	2.97045	0.319151	0.246886	0.355479	0.430167	0.569614	0.453851
C1orf56	2028	0.649404	-0.986127	0.0692048	0.374922	0	0.32136	0.44649	0.329603	0.723413	0.610822	0.38745	0.158462	0.220163	0.162526	0.356713	0.301194	0.191051
DOK2	1770	0.649366	4.91599	2.80281e-07	0.000146911	0	22.3702	24.2593	23.8283	35.0367	40.2932	35.1842	12.6386	13.7058	13.4623	19.7947	22.7645	19.8781
MACROD2	5106	0.649187	-1.06317	0.0605975	0.355381	0	0.357067	0.361444	0.310214	0.566999	0.652948	0.4059	0.0699308	0.0707881	0.0607549	0.111046	0.127879	0.0794948
SNORA44	132	0.648052	1.80351	0.000283087	0.0217784	0	2.35664	3.08291	2.65621	4.12541	4.17044	4.3542	17.8533	23.3553	20.1228	31.2531	31.5942	32.9864
ABLIM3	4778	0.648027	-0.804209	0.0686835	0.373802	0	0.410627	0.574058	0.271438	0.488793	0.652948	0.811801	0.0859412	0.120146	0.0568099	0.102301	0.136657	0.169904
TMEM145	1779	0.644259	0.920741	0.00384026	0.0947809	0	1.28544	1.65839	1.41535	2.75679	2.06416	1.97415	0.722564	0.932204	0.795589	1.54963	1.16029	1.1097
IL2RA	3216	0.644176	-0.598506	0.0705922	0.375665	0	0.464187	0.44649	0.542875	1.1731	0.568696	0.535051	0.144337	0.138834	0.168804	0.364771	0.176833	0.166371
NOG	1892	0.644156	-0.481277	0.0335851	0.27871	0	0.571307	0.510274	0.504098	0.762517	1.05314	0.682651	0.301959	0.269701	0.266437	0.403021	0.556629	0.360809
CCR7	2700	0.641288	1.694	0.000944801	0.0441061	0	2.08884	3.04038	2.40416	4.20362	4.023	3.48705	0.773645	1.12607	0.89043	1.5569	1.49	1.2915
ENPEP	4995	0.640479	-1.83882	0.163738	0.534916	0	0.232093	0.191353	0.135719	0.195517	0.252754	0.42435	0.0464652	0.0383089	0.0271709	0.0391426	0.0506014	0.0849551
LGALS9B	1243	0.640356	-0.139475	0.0441855	0.311496	0	0.821254	0.850457	0.36838	1.27086	0.96889	0.940951	0.660703	0.684197	0.296363	1.02241	0.779477	0.757
ROPN1L	1078	0.638516	-0.758055	0.0524099	0.334375	0	0.5356	0.318921	0.426545	0.566999	0.631885	0.811801	0.496846	0.295845	0.395682	0.525974	0.586164	0.753062
GNA14	2491	0.638479	-1.83857	0.152095	0.519723	0	0.196387	0.191353	0.174496	0.371482	0.168503	0.3321	0.0788385	0.0768177	0.0700504	0.14913	0.0676446	0.13332
CD24	3159	0.6384	-2.01419	0.264913	0.640859	0	0.0357067	0.29766	0.174496	0.156414	0.337005	0.27675	0.0113032	0.094226	0.0552376	0.0495137	0.106681	0.0876069
DUSP27	4034	0.637766	-1.11451	0.0631184	0.361297	0	0.32136	0.382706	0.290826	0.547448	0.421257	0.571951	0.0796629	0.09487	0.0720937	0.135708	0.104427	0.141783
C9	2692	0.637624	2.26988	0.000220335	0.0187042	0	3.60638	3.59318	4.03279	4.80972	6.19247	6.47596	1.33966	1.33476	1.49806	1.78667	2.30032	2.40563
CADM1	4394	0.636119	1.62873	0.00182844	0.0626506	0	2.62444	1.7647	2.75315	3.24558	3.93875	3.96675	0.597278	0.401615	0.626571	0.73864	0.896393	0.902766
KIF17	4098	0.633897	-1.88896	0.142688	0.50657	0	0.21424	0.170091	0.155107	0.332379	0.29488	0.2214	0.0522792	0.0415059	0.0378495	0.0811076	0.071957	0.0540264
FAM20C	4810	0.633795	0.0604025	0.0193959	0.215416	0	0.624867	1.02055	0.736759	1.40772	1.15846	1.107	0.12991	0.212172	0.153172	0.292666	0.240843	0.230146
RINL	3060	0.633725	3.44084	1.9885e-06	0.000574489	0	8.51605	8.69592	8.24007	13.217	13.059	13.2102	2.78302	2.8418	2.69283	4.31927	4.26763	4.31706
NINJ2	1457	0.633696	-0.786848	0.112331	0.458058	0	0.339214	0.680365	0.271438	0.391034	0.716136	0.867151	0.232816	0.466963	0.186299	0.268383	0.491514	0.595162
ACKR3	2100	0.633423	1.42243	0.000750311	0.0382959	0	1.98172	2.18993	2.05517	3.22603	3.58068	2.85975	0.943677	1.04282	0.978653	1.53621	1.70509	1.36179
PDE2A	4696	0.632797	-0.693624	0.0515222	0.332452	0	0.32136	0.44649	0.60104	0.762517	0.631885	0.719551	0.0684328	0.0950788	0.12799	0.162376	0.134558	0.153226
C1orf234	510	0.632261	-1.44536	0.147352	0.513031	0	0.37492	0.127569	0.252049	0.254172	0.463382	0.479701	0.735138	0.250134	0.494214	0.498377	0.908593	0.940589
DAB2	4601	0.630731	-0.564014	0.0671852	0.371004	0	0.464187	0.59532	0.445933	1.07534	0.463382	0.774901	0.100888	0.129389	0.0969209	0.23372	0.100713	0.16842
RAPGEF3	6602	0.630126	0.593486	0.00792472	0.138047	0	1.24973	0.999287	1.20208	2.18979	1.62184	1.5498	0.189296	0.151361	0.182078	0.331686	0.245659	0.234747
LOC103091866	1503	0.629486	-1.09404	0.0965026	0.43031	0	0.357067	0.425228	0.232661	0.723413	0.379131	0.461251	0.237569	0.28292	0.154798	0.481313	0.252249	0.306887
LOC254896	1241	0.628602	-1.3458	0.0963985	0.43031	0	0.2678	0.233876	0.329603	0.547448	0.315942	0.42435	0.215794	0.188457	0.265595	0.441134	0.254587	0.341942
ABCD2	5341	0.628326	-1.64905	0.138418	0.499755	0	0.178533	0.14883	0.329603	0.312827	0.400194	0.31365	0.033427	0.0278656	0.0617118	0.0585709	0.0749286	0.058725
SENCR	1298	0.626588	-0.269734	0.0217753	0.226665	0	0.571307	0.59532	0.697982	1.03624	0.863576	0.977851	0.440144	0.458644	0.537737	0.798336	0.665313	0.753352
STK4-AS1	2116	0.625576	-1.28485	0.124526	0.478121	0	0.178533	0.361444	0.348991	0.606103	0.463382	0.2952	0.0843731	0.170815	0.16493	0.286438	0.21899	0.139509
PKHD1	17407	0.625502	-0.537778	0.0432923	0.308875	0	0.517747	0.425228	0.581652	0.840723	0.589759	0.922501	0.0297436	0.0244286	0.0334148	0.048298	0.0338806	0.052996
TIMP3	5486	0.624058	0.271607	0.0121933	0.170782	0	0.839107	0.914241	1.0082	1.134	1.49546	1.6236	0.152954	0.16665	0.183776	0.206708	0.272596	0.295954
SHISA2	2889	0.624048	5.87548	1.72346e-07	0.000109957	0	44.3656	43.8623	50.2935	67.3947	76.0789	70.0547	15.3567	15.1825	17.4086	23.328	26.334	24.2488
NXF3	1896	0.623229	1.22279	0.00129328	0.0519754	0	2.01743	1.7647	1.62863	2.61993	2.73817	2.9889	1.06404	0.930748	0.85898	1.38182	1.44418	1.57643
C19orf45	1679	0.621598	-0.840617	0.121967	0.473278	0	0.392774	0.361444	0.465322	0.430138	0.379131	1.05165	0.233933	0.215273	0.277142	0.256187	0.225808	0.626356
VAMP8	776	0.620925	-1.50918	0.118818	0.467696	0	0.285654	0.29766	0.155107	0.312827	0.400194	0.42435	0.36811	0.383582	0.19988	0.403128	0.515714	0.546843
MKNK2	3785	0.620504	8.59623	0.00276395	0.0812929	0	307.435	306.632	300.986	576.091	478.042	352.728	81.2245	81.0125	79.5206	152.204	126.299	93.1909
DDX39B	16323	0.617743	-1.37981	0.109259	0.453748	0	0.196387	0.340183	0.290826	0.488793	0.463382	0.31365	0.0120313	0.0208407	0.0178169	0.029945	0.0283883	0.0192152
LINC01432	677	0.617667	-1.26324	0.117478	0.465672	0	0.196387	0.255137	0.445933	0.351931	0.547634	0.479701	0.290084	0.376864	0.65869	0.519839	0.808912	0.708568
MIR93	80	0.617517	-1.77292	0.140149	0.502567	0	0.2678	0.14883	0.174496	0.293276	0.315942	0.31365	3.3475	1.86037	2.18119	3.66594	3.94928	3.92063
DKFZp779M0652	649	0.617033	-1.94323	0.206683	0.583945	0	0.196387	0.0637843	0.252049	0.312827	0.210628	0.27675	0.302599	0.0982808	0.388365	0.482014	0.324543	0.426426
SV2B	11700	0.616522	-2.13525	0.204517	0.582074	0	0.142827	0.0850457	0.213272	0.195517	0.231691	0.2583	0.0122074	0.00726886	0.0182284	0.0167109	0.0198027	0.0220769
CFAP45	1795	0.616333	-0.361238	0.0331622	0.27687	0	0.48204	0.701627	0.581652	1.01669	0.905702	0.774901	0.268546	0.390878	0.32404	0.5664	0.504569	0.4317
KIF26B	13671	0.616162	0.0325348	0.0351236	0.284256	0	0.5356	1.10559	0.717371	1.21221	1.01102	1.34685	0.0391778	0.0808715	0.0524739	0.0886699	0.0739533	0.0985189
SEC31B	4612	0.614872	6.74471	2.54089e-07	0.000145632	0	87.9634	90.5099	75.6341	133.812	133.18	122.158	19.0727	19.6249	16.3994	29.0139	28.8769	26.4869
HCP5	9081	0.614236	0.831262	0.00785919	0.137689	0	1.73177	1.23316	1.14392	1.87696	2.46435	1.9926	0.190703	0.135796	0.125968	0.206691	0.271374	0.219425
RAD21L1	1808	0.613402	-2.24034	0.252547	0.630936	0	0.10712	0.233876	0.0775536	0.215069	0.273817	0.1476	0.0592478	0.129356	0.0428947	0.118954	0.151447	0.0816373
TTC41P	4516	0.613186	-1.80394	0.215589	0.594063	0	0.124973	0.318921	0.155107	0.449689	0.168503	0.27675	0.0276735	0.0706203	0.0343461	0.0995769	0.0373124	0.0612822
NMB	1030	0.613029	2.59345	4.41631e-05	0.00656529	0	4.57046	4.65625	5.00221	6.72579	7.43518	7.60141	4.43734	4.52063	4.85651	6.52989	7.21862	7.38001
NYAP1	3583	0.612583	-0.0504571	0.0209506	0.223271	0	0.678427	0.765411	0.756148	1.01669	0.96889	1.3653	0.189346	0.213623	0.211038	0.283753	0.270413	0.38105
TRPC1	4170	0.612544	-0.657221	0.0499605	0.326952	0	0.499894	0.340183	0.562264	0.645206	0.779325	0.738001	0.119879	0.0815786	0.134835	0.154726	0.186888	0.176979
POU2F2	7185	0.612022	2.69577	0.000329071	0.0235256	0	4.57046	5.03896	5.6808	7.84023	6.36098	9.11431	0.636111	0.701316	0.790647	1.09119	0.885313	1.26852
SLC26A11	3053	0.611232	0.418261	0.0104308	0.158367	0	1.14261	0.999287	0.930643	1.85741	1.36908	1.476	0.374259	0.327313	0.304829	0.608389	0.448439	0.483459
OXCT2	1824	0.610816	-2.03495	0.178172	0.554282	0	0.124973	0.170091	0.193884	0.195517	0.273817	0.27675	0.0685161	0.0932518	0.106296	0.107191	0.150119	0.151727
SLC17A9	2654	0.610809	-0.284526	0.0636277	0.361703	0	0.874814	0.552797	0.407156	0.977585	0.674011	1.16235	0.329621	0.208288	0.153412	0.368344	0.25396	0.437962
HSPA12B	3148	0.610026	0.834884	0.0034627	0.089867	0	1.21403	1.46704	1.47352	2.17024	1.95884	2.19555	0.38565	0.466022	0.468081	0.689403	0.62225	0.697444
ASTL	1296	0.609917	0.975189	0.00450612	0.103281	0	1.89245	1.42452	1.24086	2.38531	2.27479	2.3247	1.46023	1.09916	0.957452	1.84052	1.75524	1.79375
MAP7	5478	0.609342	1.60708	0.00126588	0.0516885	0	2.58873	2.31749	2.22967	2.99141	3.81237	4.0959	0.472569	0.423055	0.407022	0.546077	0.695942	0.747701
RAB38	1460	0.608983	-0.754519	0.0771904	0.388796	0	0.499894	0.489013	0.329603	0.742965	0.842513	0.442801	0.342393	0.33494	0.225755	0.50888	0.577064	0.303288
UBE2Q2L	498	0.606149	-0.173306	0.0396563	0.29924	0	0.74984	0.616581	0.639817	0.742965	0.947827	1.3653	1.5057	1.23811	1.28477	1.4919	1.90327	2.74157
PRSS57	1078	0.604077	0.244062	0.0140757	0.183973	0	0.767694	0.999287	0.96942	1.44683	1.17952	1.5129	0.712146	0.926982	0.899276	1.34214	1.09417	1.40343
VIM	2136	0.603118	9.49917	6.11303e-08	5.97203e-05	0	555.739	584.115	583.765	878.204	911.62	828.351	260.177	273.462	273.298	411.144	426.789	387.805
CRYBG3	10752	0.602693	3.38051	6.57616e-06	0.0016241	0	8.49819	7.67537	8.5309	12.1025	12.8273	12.6198	0.790382	0.713855	0.793424	1.12561	1.19301	1.17372
LOC731157	475	0.601673	-0.702564	0.059313	0.352343	0	0.58916	0.382706	0.387768	0.586551	0.779325	0.719551	1.24034	0.805696	0.816354	1.23484	1.64068	1.51484
GPR65	4522	0.60151	2.87122	0.000133992	0.0127433	0	5.39171	5.54923	6.41756	7.9771	10.2365	8.15491	1.19233	1.22716	1.41919	1.76406	2.26372	1.80339
RAP1GAP2	6663	0.601275	6.03457	4.01424e-08	5.12217e-05	0	51.7033	52.7283	51.7476	78.3632	75.3628	83.1727	7.75976	7.9136	7.76642	11.761	11.3106	12.4828
PCDHB9	4412	0.600462	-0.970864	0.0719021	0.377949	0	0.464187	0.318921	0.329603	0.566999	0.484445	0.645751	0.10521	0.072285	0.074706	0.128513	0.109802	0.146362
FAXDC2	2997	0.600157	-1.8211	0.145245	0.510711	0	0.21424	0.170091	0.193884	0.273724	0.337005	0.27675	0.0714849	0.0567539	0.0646927	0.0913326	0.112448	0.0923424
MCC	9266	0.599875	-0.171185	0.0343771	0.281974	0	0.678427	0.850457	0.504098	1.07534	0.863576	1.12545	0.0732168	0.0917825	0.054403	0.116053	0.0931984	0.12146
METTL12	1382	0.599661	1.49666	0.00319905	0.0860877	0	1.74963	2.65768	2.26844	3.89079	3.13836	3.04425	1.26601	1.92307	1.64142	2.81533	2.27088	2.20279
LCN12	689	0.599483	0.0207777	0.0179725	0.207165	0	0.767694	0.701627	0.85309	1.30996	1.03208	1.1808	1.11421	1.01833	1.23816	1.90125	1.49794	1.71379
ATP6V0A4	3357	0.599184	-1.54918	0.142552	0.506439	0	0.196387	0.361444	0.174496	0.332379	0.337005	0.42435	0.0585007	0.107669	0.0519796	0.0990107	0.100389	0.126408
PAX8	4055	0.598296	-0.35707	0.0312067	0.269507	0	0.553454	0.659104	0.562264	0.899378	0.800388	0.977851	0.136487	0.162541	0.138659	0.221795	0.197383	0.241147
LINC01018	3366	0.597727	-1.44235	0.218061	0.597031	0	0.0714134	0.44649	0.290826	0.371482	0.315942	0.498151	0.0212161	0.132647	0.0864011	0.110363	0.0938629	0.147995
GFPT2	3011	0.597319	1.08015	0.00369132	0.0925065	0	1.67821	1.55208	1.72557	2.15069	3.01198	2.3616	0.557361	0.515471	0.573088	0.714277	1.00033	0.784325
C1orf145	3534	0.597045	1.99554	0.00178752	0.0619243	0	3.67779	3.253	2.48172	4.75106	4.00194	5.47966	1.04069	0.920486	0.70224	1.34439	1.13241	1.55055
CHRNA7	6864	0.596984	1.2217	0.00491708	0.107712	0	2.07099	1.72218	1.6674	3.402	2.2116	2.6568	0.301717	0.2509	0.24292	0.495629	0.322202	0.387063
GIMAP7	1229	0.596951	4.65244	1.10852e-05	0.00242481	0	18.7817	20.5598	20.6486	25.8278	34.543	30.3687	15.2821	16.7289	16.8012	21.0153	28.1066	24.7101
MIR320E	53	0.596703	-1.39314	0.104993	0.446199	0	0.232093	0.276398	0.310214	0.488793	0.400194	0.35055	4.37912	5.21507	5.8531	9.2225	7.55083	6.61416
TRIM58	5156	0.59578	-0.0264745	0.0475979	0.320268	0	0.767694	0.765411	0.717371	0.68431	1.20058	1.5129	0.148893	0.148451	0.139133	0.132721	0.232851	0.293425
FOS	2158	0.595762	2.44755	0.000335993	0.0235256	0	4.2491	4.40111	4.30422	5.82641	7.8775	5.90401	1.969	2.03944	1.99454	2.69991	3.65037	2.73587
LOC606724	1142	0.595369	-1.44743	0.541292	0.831071	0	0.357067	0.382706	0.0387768	0.23462	0.0421257	0.867151	0.312668	0.335119	0.0339552	0.205447	0.0368876	0.759327
ANKRD6	5936	0.595065	0.147484	0.0281046	0.257842	0	0.714134	1.08433	0.775536	0.977585	1.43227	1.45755	0.120306	0.182671	0.13065	0.164688	0.241286	0.245544
FAM131B	4442	0.594877	0.554376	0.00748391	0.132785	0	1.14261	1.25442	1.02759	1.60324	1.85353	1.71585	0.25723	0.282401	0.231334	0.360927	0.417274	0.386279
RNA28S5	20284	0.594173	6.37073	0.021475	0.225377	0	47.3828	78.9862	71.5238	99.8701	89.7698	108.818	2.33597	3.89401	3.52612	4.92359	4.42565	5.36473
TMEM74B	2228	0.592169	0.281244	0.0180504	0.207534	0	0.946227	1.08433	0.794924	1.62279	1.49546	1.1439	0.424698	0.486684	0.356788	0.728362	0.671212	0.513421
KIAA1217	9229	0.591413	2.01869	0.00106097	0.0472254	0	3.69564	3.38057	2.52049	4.5751	4.61276	5.27671	0.400438	0.366298	0.273106	0.495731	0.499811	0.571753
ADTRP	1858	0.591368	3.4883	6.08072e-05	0.00776734	0	8.64102	8.67466	9.46154	12.1416	15.9446	12.3062	4.65071	4.66882	5.09232	6.53477	8.58157	6.62334
XKR7	2910	0.588195	-0.924554	0.0968306	0.43102	0	0.303507	0.403967	0.465322	0.742965	0.379131	0.627301	0.104298	0.13882	0.159904	0.255314	0.130286	0.215567
RNA18S5	13083	0.587408	1.97945	0.0876915	0.413446	0	4.26695	2.57263	2.46233	6.72579	3.13836	4.1697	0.326145	0.196639	0.188208	0.514086	0.239881	0.318712
KCNQ2	4740	0.587335	-0.998282	0.0819752	0.401165	0	0.410627	0.361444	0.329603	0.449689	0.505508	0.701101	0.0866302	0.076254	0.0695365	0.0948711	0.106647	0.147912
SNORA5C	137	0.587132	2.18232	0.000334267	0.0235256	0	3.12434	3.93336	3.76135	4.98569	5.6659	5.57191	22.8054	28.7107	27.4551	36.3919	41.3569	40.6708
POF1B	4035	0.585082	-0.169816	0.0353627	0.284537	0	0.69628	0.829195	0.523487	1.15355	1.03208	0.885601	0.17256	0.205501	0.129737	0.285886	0.255782	0.21948
ADRA2B	3371	0.584921	-1.21891	0.113731	0.459879	0	0.232093	0.44649	0.271438	0.469241	0.400194	0.535051	0.06885	0.13245	0.0805214	0.139199	0.118717	0.158722
LZTS3	4101	0.584857	3.6754	2.88813e-06	0.000804055	0	10.1586	10.1204	10.2952	15.2894	15.1652	15.4058	2.47709	2.4678	2.51042	3.72822	3.69794	3.75659
CAPN9	2593	0.584699	-1.9077	0.227083	0.607086	0	0.196387	0.212614	0.135719	0.23462	0.14744	0.42435	0.0757373	0.0819955	0.0523405	0.0904823	0.0568607	0.163652
AP3B2	3787	0.583093	2.59024	0.000338318	0.0235256	0	4.39192	4.89013	5.09915	6.58893	6.4031	8.50546	1.15974	1.29129	1.34649	1.73988	1.69081	2.24596
CCR1	2676	0.581633	-2.15622	0.241545	0.621082	0	0.232093	0.106307	0.096942	0.195517	0.252754	0.2214	0.0867315	0.0397261	0.0362265	0.0730632	0.0944522	0.0827355
WEE2	6122	0.581201	-2.0553	0.244721	0.622452	0	0.249947	0.14883	0.0775536	0.175965	0.273817	0.27675	0.0408276	0.0243107	0.012668	0.0287431	0.0447267	0.0452059
SOX8	3049	0.580966	-0.0495275	0.020217	0.220016	0	0.785547	0.74415	0.697982	1.05579	1.15846	1.12545	0.257641	0.244064	0.228922	0.346275	0.379946	0.369121
RPS12	503	0.578914	8.52136	0.000229253	0.0192875	0	282.565	288.326	313.103	394.475	539.693	386.343	561.759	573.213	622.472	784.245	1072.95	768.078
WWC2	8808	0.578698	-0.0858835	0.03459	0.282077	0	0.74984	0.659104	0.756148	0.879827	0.96889	1.38375	0.0851318	0.0748302	0.0858478	0.0998895	0.110001	0.157102
EHD2	3584	0.574903	-0.600301	0.0776752	0.390087	0	0.446334	0.382706	0.659206	0.723413	0.568696	0.922501	0.124535	0.106782	0.18393	0.201845	0.158676	0.257394
KCNC3	6272	0.574288	2.98519	0.000249514	0.0203193	0	5.60595	7.14384	6.28184	10.4993	7.96175	9.79696	0.893806	1.139	1.00157	1.67399	1.26941	1.56202
RPL23P8	523	0.574073	-0.266485	0.114937	0.462289	0	0.731987	0.659104	0.523487	0.566999	1.57971	0.738001	1.39959	1.26024	1.00093	1.08413	3.02048	1.41109
CRABP2	1164	0.572928	-0.16281	0.0603305	0.354707	0	0.8034	0.786673	0.465322	1.01669	0.737199	1.2915	0.690207	0.675836	0.399761	0.873444	0.633333	1.10954
KANK4	5477	0.572702	-0.371395	0.0762364	0.387556	0	0.660574	0.659104	0.445933	0.938482	0.547634	1.12545	0.120609	0.12034	0.0814192	0.17135	0.0999879	0.205487
PARM1	5054	0.572501	0.404092	0.0306512	0.26652	0	0.856961	1.08433	1.1633	1.15355	1.39015	2.04795	0.169561	0.214549	0.230175	0.228245	0.275059	0.405214
FAM27C	703	0.572208	-0.934489	0.116997	0.464612	0	0.339214	0.361444	0.465322	0.410586	0.463382	0.848701	0.482523	0.514145	0.661908	0.584048	0.65915	1.20726
IL17D	1861	0.5722	-0.482041	0.0750292	0.383973	0	0.446334	0.552797	0.639817	0.527896	0.926765	0.977851	0.239835	0.297043	0.343803	0.283663	0.497993	0.525444
LOC101927620	1076	0.572192	-2.05391	0.265953	0.641909	0	0.0714134	0.14883	0.271438	0.175965	0.29488	0.2583	0.0663693	0.138318	0.252265	0.163537	0.274052	0.240056
MIR4748	82	0.572145	-1.2862	0.155782	0.524943	0	0.32136	0.425228	0.155107	0.566999	0.379131	0.38745	3.91903	5.18571	1.89155	6.91463	4.62355	4.72501
LOC100507195	574	0.572123	-0.34543	0.0408305	0.301844	0	0.64272	0.637843	0.523487	0.762517	0.905702	1.01475	1.11972	1.11122	0.911998	1.32843	1.57788	1.76786
ABLIM1	8303	0.571107	8.54891	1.233e-06	0.000449517	0	308.434	315.732	279.794	490.767	447.501	404.72	37.1473	38.0263	33.6979	59.1072	53.8963	48.7438
LGALS9C	1719	0.570432	-1.28797	0.169937	0.54357	0	0.357067	0.340183	0.193884	0.606103	0.231691	0.479701	0.207718	0.197896	0.112789	0.35259	0.134783	0.279058
MYCNOS	1908	0.569847	-1.15447	0.0998454	0.436327	0	0.2678	0.340183	0.387768	0.547448	0.526571	0.4059	0.140356	0.178293	0.203233	0.286922	0.27598	0.212736
MIR4730	76	0.569256	-1.53589	0.126842	0.480612	0	0.21424	0.255137	0.271438	0.371482	0.358068	0.369	2.81895	3.35707	3.57155	4.88793	4.71142	4.85527
NR3C2	5898	0.569021	1.33627	0.00245081	0.0750536	0	1.92816	2.1474	1.93884	3.36289	2.59073	2.952	0.326918	0.36409	0.328728	0.570175	0.439255	0.500509
FRMPD4	8465	0.568263	0.33866	0.0249466	0.244391	0	0.910521	1.12686	0.930643	1.27086	1.22164	1.8819	0.107563	0.133119	0.10994	0.150131	0.144317	0.222316
TRIB2	4406	0.568158	7.23516	6.54036e-08	5.97203e-05	0	120.671	123.912	119.452	176.826	184.194	178.707	27.3878	28.1234	27.1112	40.1329	41.8054	40.5599
CH17-408M7.1	1409	0.567874	-2.01599	0.256746	0.633994	0	0.249947	0.170091	0.0775536	0.273724	0.315942	0.16605	0.177393	0.120718	0.0550416	0.194268	0.224232	0.11785
PBX1	6903	0.567312	0.304857	0.0194964	0.215683	0	1.01764	0.999287	0.872478	1.19265	1.36908	1.71585	0.14742	0.144761	0.126391	0.172773	0.198332	0.248566
CCDC116	2192	0.567008	2.23763	0.000387004	0.0248983	0	3.42784	3.72075	4.16851	5.7482	5.03402	5.95936	1.5638	1.69742	1.90169	2.62235	2.29654	2.71868
ELAVL3	4682	0.566839	-1.96041	0.239669	0.618846	0	0.16068	0.255137	0.11633	0.332379	0.14744	0.2952	0.0343187	0.0544932	0.0248463	0.0709908	0.0314908	0.0630501
CLDN23	1952	0.565999	-1.67882	0.182336	0.558338	0	0.249947	0.29766	0.11633	0.351931	0.315942	0.31365	0.128047	0.15249	0.0595955	0.180292	0.161856	0.160682
SNORD72	80	0.565935	-1.50924	0.180682	0.556068	0	0.232093	0.14883	0.36838	0.488793	0.358068	0.27675	2.90117	1.86037	4.60474	6.10991	4.47585	3.45938
TICAM2	3203	0.565834	-1.50767	0.179205	0.55494	0	0.2678	0.318921	0.174496	0.430138	0.484445	0.2214	0.0836092	0.0995696	0.0544788	0.134292	0.151247	0.0691228
KLF1	1614	0.565274	-0.188052	0.0554127	0.342543	0	0.571307	0.786673	0.678594	1.07534	0.674011	1.23615	0.35397	0.487406	0.420442	0.66626	0.417603	0.765893
DPP9-AS1	3071	0.564307	-1.60577	0.200989	0.578201	0	0.2678	0.340183	0.096942	0.371482	0.29488	0.369	0.0872029	0.110773	0.0315669	0.120965	0.0960207	0.120156
ALDOC	1651	0.563434	8.52104	6.49308e-05	0.00776734	0	288.76	269.68	331.018	487.541	456.769	370.181	174.9	163.343	200.496	295.301	276.662	224.216
CD55	3465	0.56272	2.98486	6.61984e-05	0.0078576	0	7.08778	5.76184	6.20429	9.22841	9.70997	9.26191	2.04553	1.66287	1.79056	2.66332	2.8023	2.67299
AZU1	1824	0.562229	-1.92409	0.231263	0.612477	0	0.232093	0.233876	0.0775536	0.293276	0.273817	0.23985	0.127244	0.128221	0.0425184	0.160787	0.150119	0.131497
SMIM1	573	0.559997	-1.18713	0.111157	0.456434	0	0.285654	0.276398	0.407156	0.391034	0.526571	0.516601	0.498523	0.482371	0.71057	0.682433	0.918972	0.901572
SMAD9	5592	0.558714	-1.38146	0.160292	0.530222	0	0.303507	0.361444	0.174496	0.293276	0.421257	0.516601	0.0542752	0.0646359	0.0312045	0.0524456	0.075332	0.0923821
SCN3B	6066	0.55841	0.103973	0.0347838	0.28284	0	1.05335	0.722888	0.717371	1.36862	0.989953	1.3284	0.173648	0.119171	0.118261	0.225621	0.163197	0.218991
ALOX12B	2502	0.556768	0.569042	0.0211818	0.224241	0	0.892667	1.19064	1.43474	1.75965	1.45334	1.93725	0.356781	0.475875	0.573438	0.703299	0.580869	0.774281
LINC00659	706	0.556604	1.41001	0.00276348	0.0812929	0	2.33879	2.25371	1.76434	3.30424	2.9488	3.0996	3.31273	3.19222	2.49907	4.68022	4.17677	4.39037
FMN1	26539	0.556025	-2.01468	0.272204	0.647201	0	0.124973	0.255137	0.135719	0.136862	0.379131	0.23985	0.00470905	0.00961366	0.00511394	0.00515701	0.0142858	0.00903765
ABALON	1903	0.554535	-0.0404028	0.067213	0.371004	0	0.464187	1.08433	0.756148	0.997137	1.3059	1.05165	0.243924	0.569802	0.397345	0.523982	0.68623	0.552628
SSX6	1286	0.552887	-0.805997	0.131372	0.488008	0	0.607014	0.425228	0.252049	0.840723	0.484445	0.571951	0.472017	0.33066	0.195995	0.653751	0.376707	0.444752
SH2D5	3834	0.550386	1.4303	0.00581993	0.117378	0	2.4102	1.99857	2.03578	3.03051	2.5486	3.85605	0.628639	0.521276	0.530981	0.790432	0.664737	1.00575
EGR2	3148	0.550342	0.311203	0.0314263	0.270429	0	0.946227	0.74415	1.22147	1.50548	1.15846	1.60515	0.30058	0.236388	0.388014	0.478234	0.367997	0.509896
KRTAP5-9	1188	0.549703	-0.132185	0.0464156	0.316635	0	0.892667	0.59532	0.620429	1.05579	0.863576	1.1808	0.751403	0.501111	0.522246	0.888714	0.726916	0.993941
LRRTM2	5628	0.54786	-0.949765	0.136378	0.495897	0	0.410627	0.552797	0.213272	0.664758	0.589759	0.461251	0.0729614	0.0982226	0.0378949	0.118116	0.10479	0.0819564
IRF7	4276	0.544925	3.24357	7.94588e-05	0.00894503	0	6.80212	8.44078	7.81353	10.4993	11.9005	11.1992	1.59077	1.97399	1.8273	2.45539	2.78309	2.61907
FXYD2	669	0.544675	1.64153	0.00314344	0.0850907	0	2.4102	2.25371	2.85009	4.30138	3.34899	3.321	3.60269	3.36878	4.26023	6.42956	5.00596	4.96413
BAIAP3	5080	0.543058	1.26245	0.00402056	0.0968882	0	1.99957	1.70091	2.05517	2.97186	2.99092	2.45385	0.393617	0.334826	0.404561	0.585012	0.588764	0.483042
CRLF1	1804	0.542785	-1.64901	0.21066	0.588849	0	0.124973	0.276398	0.290826	0.391034	0.231691	0.369	0.0692757	0.153214	0.161212	0.216759	0.128432	0.204546
LTA	11235	0.541676	1.18431	0.00346274	0.089867	0	1.94601	1.65839	1.8419	2.81545	2.52754	2.60145	0.17321	0.147609	0.163943	0.250596	0.22497	0.231549
ABCG4	3936	0.540406	0.643329	0.0179241	0.207135	0	1.12476	1.4883	1.12453	1.60324	1.66396	2.1402	0.285762	0.378125	0.285703	0.407327	0.422755	0.543751
SNORD38B	69	0.539971	-1.17629	0.16048	0.530335	0	0.446334	0.361444	0.174496	0.488793	0.568696	0.38745	6.4686	5.23832	2.52892	7.08395	8.24198	5.61522
FBLN5	2633	0.539936	-0.396361	0.106319	0.448565	0	0.714134	0.489013	0.542875	0.527896	0.800388	1.2177	0.271224	0.185725	0.206181	0.200492	0.303983	0.462477
MIR643	94	0.539745	-1.45801	0.18045	0.555723	0	0.37492	0.255137	0.155107	0.391034	0.315942	0.442801	3.98851	2.71422	1.65008	4.15994	3.36109	4.71064
COL16A1	5584	0.539433	1.6117	0.00161418	0.0584738	0	2.4102	2.61515	2.36538	3.83213	3.64387	3.26565	0.431626	0.46833	0.4236	0.68627	0.652555	0.584823
KIFC3	3708	0.538828	-1.83546	0.540319	0.830448	0	0	0.425228	0.193884	0.547448	0.126377	0.1845	0	0.114679	0.052288	0.14764	0.0340823	0.0497573
MAP3K6	4348	0.53849	1.79409	0.00183834	0.0627932	0	2.9458	3.10417	2.346	3.89079	3.91769	4.37266	0.677507	0.71393	0.539558	0.894846	0.901032	1.00567
MTSS1	5174	0.536436	-1.14614	0.213039	0.591841	0	0.339214	0.318921	0.348991	0.821172	0.210628	0.42435	0.0655612	0.0616392	0.0674509	0.158711	0.040709	0.0820159
SNORD101	73	0.536386	0.636866	0.0206363	0.222054	0	1.51753	1.12686	1.04697	1.64234	1.62184	2.1033	20.7881	15.4364	14.3421	22.4979	22.217	28.8124
MAGIX	2809	0.535776	0.683177	0.013504	0.181034	0	1.37471	1.38199	1.08575	1.81831	2.08522	1.67895	0.489394	0.491987	0.386526	0.647315	0.742335	0.597704
TSSC2	1477	0.535059	0.556944	0.015014	0.188593	0	1.26759	1.25442	0.988808	1.6619	1.79034	1.64205	0.858218	0.849305	0.669471	1.12518	1.21215	1.11175
OASL	2085	0.533726	0.0381468	0.0316803	0.271186	0	0.892667	0.722888	0.794924	1.21221	1.01102	1.27305	0.428138	0.346709	0.381259	0.581394	0.4849	0.610576
FZD9	2342	0.533634	-0.0760854	0.0555737	0.342962	0	0.714134	0.574058	0.930643	0.938482	0.947827	1.3284	0.304925	0.245115	0.397371	0.400718	0.404709	0.567208
TNFRSF1B	3675	0.533462	-0.134016	0.0421738	0.305471	0	0.678427	0.807934	0.659206	1.21221	0.926765	0.959401	0.184606	0.219846	0.179376	0.329852	0.252181	0.261062
ELL2	6046	0.532072	1.15518	0.00551254	0.114281	0	1.57109	1.95605	1.86129	2.48307	2.88561	2.41695	0.259857	0.323528	0.307854	0.410696	0.477276	0.399761
MTMR8	2661	0.530876	-1.37032	0.150504	0.517519	0	0.32136	0.233876	0.290826	0.332379	0.379131	0.516601	0.120767	0.0878901	0.109292	0.124908	0.142477	0.194138
TMC7	5196	0.530679	0.155155	0.0465725	0.317196	0	0.69628	1.14812	0.814313	1.07534	1.20058	1.53135	0.134003	0.220962	0.156719	0.206956	0.231059	0.294717
C22orf23	2010	0.530613	-1.19585	0.157941	0.528014	0	0.196387	0.467751	0.329603	0.508344	0.505508	0.4059	0.0977049	0.232712	0.163981	0.252908	0.251496	0.201941
MAP1LC3B2	832	0.530308	0.543357	0.0352677	0.28452	0	1.57109	0.829195	1.04697	1.83786	1.57971	1.60515	1.88833	0.996629	1.25838	2.20897	1.89869	1.92927
MS4A7	3008	0.530159	-2.33209	0.406262	0.751381	0	0.0714134	0.29766	0.0387768	0.11731	0.210628	0.23985	0.0237411	0.0989561	0.0128912	0.0389994	0.0700227	0.0797375
RUNDC3A	2433	0.529507	1.53948	0.00456899	0.104108	0	2.12455	2.63642	2.30722	2.89365	3.98088	3.321	0.873222	1.08361	0.948302	1.18934	1.6362	1.36498
CD19	1958	0.529227	-2.17619	0.266591	0.642291	0	0.10712	0.14883	0.193884	0.175965	0.252754	0.2214	0.0547089	0.0760112	0.0990214	0.0898699	0.129088	0.113075
LAMTOR5-AS1	533	0.529102	0.00328429	0.0327701	0.275595	0	0.731987	0.722888	0.911255	1.0949	1.20058	1.12545	1.37333	1.35626	1.70967	2.05421	2.2525	2.11154
RHOB	2373	0.528658	0.955542	0.00755781	0.13377	0	1.66036	1.42452	1.57046	2.22889	2.00097	2.49075	0.699689	0.600301	0.661804	0.939273	0.843223	1.04962
ADAM21	2664	0.528212	-0.855303	0.104468	0.445327	0	0.48204	0.467751	0.310214	0.527896	0.568696	0.719551	0.180946	0.175582	0.116447	0.198159	0.213475	0.270102
SDK1	10619	0.527825	-0.268457	0.0494253	0.326322	0	0.553454	0.701627	0.697982	0.840723	1.01102	0.959401	0.0521192	0.0660728	0.0657296	0.0791716	0.0952082	0.0903476
SNORD16	100	0.527161	-0.754571	0.098342	0.433928	0	0.357067	0.510274	0.504098	0.527896	0.800388	0.645751	3.57067	5.10274	5.04098	5.27896	8.00388	6.45751
CREB3L1	2710	0.526585	1.37377	0.00926979	0.148939	0	1.71392	2.18993	2.38477	3.03051	2.44329	3.5424	0.632443	0.808091	0.87999	1.11827	0.901582	1.30716
SOCS1	1216	0.526469	1.09397	0.0116465	0.16684	0	1.92816	1.70091	1.5123	2.99141	2.00097	2.41695	1.58566	1.39878	1.24366	2.46004	1.64553	1.98763
GATA6	3776	0.526402	-1.66595	0.227198	0.607086	0	0.2678	0.127569	0.271438	0.332379	0.210628	0.42435	0.0709217	0.033784	0.071885	0.0880241	0.0557808	0.112381
TPO	5986	0.52596	3.26821	5.98186e-05	0.00776223	0	7.7662	7.84546	7.98802	12.1612	10.2155	11.5866	1.29739	1.31064	1.33445	2.0316	1.70656	1.93562
LOC102724601	448	0.525754	-2.2883	0.335049	0.699684	0	0.21424	0.0850457	0.096942	0.23462	0.105314	0.23985	0.478215	0.189834	0.216388	0.523706	0.235076	0.53538
PIK3IP1-AS1	422	0.525559	-2.17638	0.280148	0.65279	0	0.0892667	0.14883	0.213272	0.23462	0.189565	0.2214	0.211533	0.352678	0.505385	0.555973	0.449207	0.524645
LOC102724467	767	0.525262	0.662299	0.033261	0.277392	0	1.55324	0.850457	1.35719	1.95517	1.49546	1.9926	2.02509	1.10881	1.76948	2.54911	1.94975	2.59792
FGFBP2	1171	0.524942	-0.123983	0.0474518	0.320214	0	0.571307	0.765411	0.833701	1.05579	0.926765	1.12545	0.48788	0.653639	0.711957	0.901616	0.79143	0.961103
JPH3	4658	0.524725	0.185457	0.0380425	0.29416	0	0.892667	1.12686	0.697982	1.27086	1.45334	1.1808	0.191642	0.241918	0.149846	0.272834	0.312008	0.2535
SORBS2	8979	0.524596	-1.04465	0.204014	0.581378	0	0.196387	0.489013	0.426545	0.351931	0.421257	0.793351	0.0218718	0.0544618	0.0475047	0.0391949	0.0469158	0.0883563
HEXA-AS1	2676	0.52457	-1.28706	0.131673	0.488651	0	0.339214	0.318921	0.252049	0.469241	0.400194	0.442801	0.126761	0.119178	0.0941888	0.175352	0.149549	0.165471
HSH2D	3073	0.523563	4.02107	6.45398e-05	0.00776734	0	13.4614	15.1169	11.3228	19.3953	19.2936	18.6345	4.38055	4.91925	3.68462	6.31152	6.27841	6.06395
MMRN2	4179	0.523455	-0.45047	0.106612	0.448841	0	0.69628	0.637843	0.36838	1.07534	0.695073	0.682651	0.166614	0.15263	0.0881502	0.257321	0.166325	0.163353
CPNE5	3339	0.521536	-0.926249	0.126217	0.479867	0	0.517747	0.318921	0.348991	0.645206	0.421257	0.645751	0.15506	0.095514	0.10452	0.193233	0.126163	0.193396
SNORD2	70	0.520644	2.07665	0.0028457	0.0812929	0	3.57067	2.95534	3.76135	4.30138	5.91866	4.59406	51.0096	42.2191	53.7336	61.4482	84.5522	65.6294
RIMS2	7973	0.519971	0.937078	0.00997085	0.154999	0	1.55324	1.74344	1.3378	2.46352	2.12735	2.04795	0.194813	0.218668	0.167791	0.308982	0.266819	0.256861
[truncated: 14,706 more rows]

## Sheet: B_vs_D
Geneid	gene_length	logFC	logCPM	PValue	FDR	is.sig	CPM.TMMnormalized.10	CPM.TMMnormalized.13	CPM.TMMnormalized.16	CPM.TMMnormalized.2	CPM.TMMnormalized.5	CPM.TMMnormalized.8	FPKM.TMMnormalized.10	FPKM.TMMnormalized.13	FPKM.TMMnormalized.16	FPKM.TMMnormalized.2	FPKM.TMMnormalized.5	FPKM.TMMnormalized.8
[truncated: 15,305 more rows]

[truncated: 2 more sheets: F_vs_D, Integrator_PP2A expression]
